# Supplementary material for: Developmental molecular controls over arealization of descending cortical motor pathways
Source: Research Square preprint supplement (doi:10.21203/rs.3.rs-3166328/v1), 2023-07-24
Supplement: Supplementary file 1 [file 362041da9fbc99e16e66ec0a.xlsx]

## Sheet: DEGregion_singleAge_MAST_310120
gene	p_val	avg_log2FC	pct.1	pct.2	p_val_adj	cluster	age
St6galnac5	0	1.96967	0.763	0.318	0	MO	P08
Lsamp	0	1.44783	0.992	0.947	0	MO	P08
Gm26871	0	1.40758	0.645	0.263	0	MO	P08
Pcdh15	0	1.38048	0.867	0.485	0	MO	P08
Dlg2.1	0	1.2915	0.648	0.269	0	MO	P08
Gpc5	0	1.25937	0.979	0.848	0	MO	P08
Tnr	0	1.1142	0.835	0.508	0	MO	P08
Ptprt	0	1.09483	0.921	0.645	0	MO	P08
Snhg14	0	1.04628	0.644	0.265	0	MO	P08
Pitpnc1	0	0.997937	0.846	0.52	0	MO	P08
Rian	0	0.991151	0.646	0.267	0	MO	P08
Pigk	0	0.970718	0.696	0.429	0	MO	P08
Gm27247	0	0.948897	0.584	0.189	0	MO	P08
Crim1	0	0.900335	0.799	0.415	0	MO	P08
Gm12394	0	0.89059	0.543	0.161	0	MO	P08
L3mbtl4	0	0.878208	0.903	0.676	0	MO	P08
Mir99ahg	0	0.877005	0.551	0.159	0	MO	P08
Grid2	0	0.86498	0.998	0.983	0	MO	P08
9330162G02Rik	0	0.849844	0.643	0.265	0	MO	P08
Mgat4c	0	0.816628	0.894	0.669	0	MO	P08
Fras1	0	0.810817	0.79	0.489	0	MO	P08
Zcchc16	0	0.807995	0.513	0.162	0	MO	P08
Nkain3	0	0.790302	0.923	0.701	0	MO	P08
A930011G23Rik	0	0.790301	0.59	0.232	0	MO	P08
Gm4258	0	0.778742	0.509	0.144	0	MO	P08
Diaph3	0	0.775592	0.53	0.163	0	MO	P08
Gm17167	0	0.766474	0.578	0.202	0	MO	P08
Gm2163	0	0.733378	0.495	0.144	0	MO	P08
Opcml	0	0.727215	1	0.999	0	MO	P08
Kcnip1	0	0.714795	0.485	0.195	0	MO	P08
Ndst3	0	0.709613	0.582	0.275	0	MO	P08
2610203C20Rik	0	0.708256	0.585	0.226	0	MO	P08
Gm38073	0	0.705155	0.581	0.202	0	MO	P08
Lrrc4c	0	0.703844	0.992	0.976	0	MO	P08
Ephb1	0	0.695769	0.937	0.784	0	MO	P08
Runx2	0	0.670355	0.626	0.296	0	MO	P08
Ryr3	0	0.642156	0.931	0.769	0	MO	P08
Grik4	0	0.641944	0.645	0.316	0	MO	P08
C77370	0	0.634834	0.476	0.132	0	MO	P08
Whsc1l1	0	0.604856	0.505	0.158	0	MO	P08
Rn18s-rs5	0	0.60096	0.378	0.062	0	MO	P08
Hdac9	0	0.59903	0.991	0.967	0	MO	P08
A330023F24Rik	0	0.583413	0.451	0.115	0	MO	P08
RP24-274B19.1	0	0.583363	0.489	0.146	0	MO	P08
Gm15800	0	0.574616	0.548	0.197	0	MO	P08
Trerf1	0	0.569265	0.572	0.219	0	MO	P08
Pde1a	0	0.566718	0.841	0.562	0	MO	P08
6430573F11Rik	0	0.556216	0.517	0.202	0	MO	P08
Zswim6	0	0.552227	0.503	0.173	0	MO	P08
Kcnip4	0	0.550428	1	0.999	0	MO	P08
A230103L15Rik	0	0.549503	0.495	0.16	0	MO	P08
A330076H08Rik	0	0.532019	0.551	0.201	0	MO	P08
Sorl1	0	0.530959	0.899	0.738	0	MO	P08
Ncam2	0	0.530805	0.992	0.952	0	MO	P08
Gucy1b3	0	0.511489	0.427	0.114	0	MO	P08
Whsc1	0	0.509785	0.441	0.124	0	MO	P08
Gm44560	0	0.506852	0.58	0.221	0	MO	P08
Ccdc64	0	0.497187	0.446	0.125	0	MO	P08
Gm37899	0	0.485666	0.486	0.158	0	MO	P08
Cadm2	0	0.485155	1	0.999	0	MO	P08
1500004A13Rik	0	0.475095	0.362	0.085	0	MO	P08
RP24-349L11.1	0	0.469189	0.37	0.091	0	MO	P08
Tmem181b-ps	0	0.467068	0.43	0.126	0	MO	P08
Nedd4l	0	0.464842	0.964	0.899	0	MO	P08
Dfna5	0	0.450447	0.35	0.079	0	MO	P08
Gm1043	0	0.441456	0.478	0.165	0	MO	P08
RP23-331E5.5	0	0.441053	0.369	0.089	0	MO	P08
D930015E06Rik	0	0.440647	0.395	0.11	0	MO	P08
Kcnq1	0	0.431096	0.373	0.101	0	MO	P08
Gm28928	0	0.416454	1	0.996	0	MO	P08
Gm20417	0	0.409268	0.298	0.044	0	MO	P08
Gbas	0	0.401834	0.313	0.06	0	MO	P08
Gucy1a3	0	0.397079	0.332	0.08	0	MO	P08
6820431F20Rik	0	0.394732	0.33	0.069	0	MO	P08
RP23-54G8.4	0	0.390207	0.389	0.114	0	MO	P08
Hdgfrp3	0	0.389627	0.345	0.08	0	MO	P08
Gm44559	0	0.387598	0.387	0.113	0	MO	P08
Gm44562	0	0.38489	0.458	0.162	0	MO	P08
Gm20713	0	0.383578	0.243	0.034	0	MO	P08
Rfwd2	0	0.382885	0.351	0.085	0	MO	P08
Erdr1	0	0.373055	0.378	0.109	0	MO	P08
Bre	0	0.370314	0.36	0.107	0	MO	P08
Gm14172	0	0.368116	0.279	0.045	0	MO	P08
Fam178a	0	0.36272	0.348	0.09	0	MO	P08
RP24-263E2.3	0	0.351611	0.363	0.11	0	MO	P08
1700123O21Rik	0	0.343672	0.357	0.101	0	MO	P08
RP24-89C4.5	0	0.341946	0.27	0.05	0	MO	P08
2610005L07Rik	0	0.340125	0.314	0.071	0	MO	P08
Fam65b	0	0.334181	0.32	0.093	0	MO	P08
Fam134b	0	0.3326	0.328	0.084	0	MO	P08
Lnpk1	0	0.330773	0.291	0.067	0	MO	P08
Gm14306	0	0.320532	0.286	0.064	0	MO	P08
Nkain2	0	0.308149	1	1	0	MO	P08
Slmo1	0	0.305096	0.315	0.081	0	MO	P08
Nrg3	0	0.291572	1	1	0	MO	P08
1110037F02Rik	0	0.291045	0.287	0.072	0	MO	P08
AI846148	0	0.282125	0.256	0.053	0	MO	P08
Fam63b	0	0.280656	0.298	0.083	0	MO	P08
Bzrap1	0	0.269401	0.297	0.079	0	MO	P08
RP23-212H13.8	0	0.257874	0.249	0.056	0	MO	P08
Gm37928	0	0.253312	0.228	0.044	0	MO	P08
Pcdh17	4.94065645841247e-324	0.611801	0.731	0.462	1.78303350927647e-319	MO	P08
Fam135b	4.94065645841247e-324	0.542404	0.921	0.812	1.78303350927647e-319	MO	P08
Vprbp	7.75683063970757e-322	0.25262	0.234	0.048	2.79936260956407e-317	MO	P08
Adamts18	1.8962239487387e-320	0.569616	0.577	0.271	6.84328260860311e-316	MO	P08
Shc3	2.17764374060988e-319	0.542814	0.628	0.324	7.85889849548699e-315	MO	P08
1810026B05Rik	6.76773392893113e-314	0.258551	0.244	0.054	0	MO	P08
Spon1	6.82094660199188e-312	0.586629	0.797	0.537	2.46161e-307	MO	P08
Bach2	3.34855889302849e-311	0.465604	0.952	0.838	1.20846e-306	MO	P08
Khdrbs3	7.02145024836919e-311	0.38749	0.983	0.966	2.53397e-306	MO	P08
4930578G10Rik	0	0.265916	0.26	0.064	1.60914e-304	MO	P08
Foxp2	7.54732e-307	0.789764	0.708	0.472	2.72375e-302	MO	P08
Gm13986	4.92844e-306	0.385142	0.252	0.051	1.77862e-301	MO	P08
Gm16432	1.49083e-304	0.283779	0.227	0.042	5.38027e-300	MO	P08
Vwc2	9.56089e-304	0.433319	0.335	0.092	3.45043e-299	MO	P08
Zdhhc14	1.83868e-301	0.544453	0.709	0.44	6.6356e-297	MO	P08
Epo	5.18368e-301	0.271302	0.301	0.089	1.87074e-296	MO	P08
Gm26804	1.0101e-300	0.477085	0.394	0.131	3.64534e-296	MO	P08
Gm44829	6.84371e-300	0.2562	0.233	0.05	2.46983e-295	MO	P08
Dleu2	2.84615e-297	0.253553	0.227	0.049	1.02715e-292	MO	P08
Enox1	7.1193e-297	0.478709	0.966	0.924	2.56928e-292	MO	P08
Cntn1	6.42283e-294	0.398454	0.984	0.964	2.31793e-289	MO	P08
Cacnb4	4.81642e-289	0.439035	0.982	0.956	1.7382e-284	MO	P08
Nfia	6.0762e-288	0.459892	0.864	0.62	2.19284e-283	MO	P08
2210408F21Rik	6.16315e-287	0.250904	0.223	0.05	2.22422e-282	MO	P08
Kcnq5	1.33875e-282	0.319431	0.999	0.999	4.83143e-278	MO	P08
Spag5	4.18193e-274	0.365001	0.352	0.13	1.50922e-269	MO	P08
Ppfia2	5.59876e-272	0.379445	0.985	0.969	2.02054e-267	MO	P08
Fstl5	2.83672e-270	0.598233	0.805	0.589	1.02374e-265	MO	P08
Mkx	4.28658e-270	0.52902	0.77	0.533	1.54699e-265	MO	P08
Gabrb2	2.40283e-269	0.4658	0.936	0.848	8.67158e-265	MO	P08
Snap25	6.4794e-267	0.361927	0.985	0.965	2.33835e-262	MO	P08
Gm10649	2.47639e-266	0.26061	0.223	0.052	8.93705e-262	MO	P08
St6galnac3	7.88209e-255	0.775812	0.881	0.767	2.84457e-250	MO	P08
Gria3	3.91166e-254	0.481432	0.901	0.737	1.41168e-249	MO	P08
Rph3a	4.1855e-252	0.440169	0.531	0.266	1.51051e-247	MO	P08
Cttnbp2	2.2636e-251	0.438933	0.956	0.902	8.1691e-247	MO	P08
Lypd1	1.41526e-248	0.441822	0.329	0.106	5.10753e-244	MO	P08
Neto1	1.44653e-247	0.498847	0.876	0.742	5.22039e-243	MO	P08
Slc1a2	5.35387e-244	0.475841	0.525	0.271	1.93216e-239	MO	P08
Astn2	1.27253e-239	0.674405	0.906	0.802	4.59243e-235	MO	P08
Sdk2	3.61079e-231	0.432423	0.874	0.697	1.3031e-226	MO	P08
Msra	4.52469e-228	0.427577	0.957	0.91	1.63291e-223	MO	P08
Dync1i1	5.91455e-228	0.344456	0.979	0.955	2.1345e-223	MO	P08
Slc44a5	3.21604e-226	0.521916	0.427	0.201	1.16064e-221	MO	P08
Spock1	1.32292e-223	0.389079	0.941	0.82	4.77428e-219	MO	P08
Slc35f1	9.35174e-219	0.488312	0.883	0.708	3.37495e-214	MO	P08
Gprin3	2.10662e-216	0.384855	0.512	0.265	7.60258e-212	MO	P08
Klhl29	8.18025e-216	0.412358	0.914	0.801	2.95217e-211	MO	P08
Cdh13	1.65559e-214	0.361555	0.978	0.902	5.97487e-210	MO	P08
6530403H02Rik	8.13348e-214	0.311948	0.223	0.052	2.93529e-209	MO	P08
Ccser1	3.74238e-208	0.295145	0.997	0.993	1.35059e-203	MO	P08
Lyrm4	5.95889e-207	0.288032	0.339	0.135	2.15051e-202	MO	P08
Ak5	3.54924e-206	0.447076	0.709	0.478	1.28089e-201	MO	P08
Zfp608	6.66414e-206	0.4609	0.5	0.271	2.40502e-201	MO	P08
Pex5l	1.04416e-205	0.351745	0.998	0.995	3.76826e-201	MO	P08
Kcnj3	3.1173e-204	0.450076	0.842	0.695	1.125e-199	MO	P08
Il1rap	6.92184e-201	0.423644	0.42	0.195	2.49802e-196	MO	P08
Sgcz	8.57361e-195	0.304574	0.998	0.989	3.09413e-190	MO	P08
Slco3a1	4.69394e-194	0.3784	0.938	0.867	1.69399e-189	MO	P08
Tox	5.73061e-192	0.373762	0.96	0.864	2.06812e-187	MO	P08
Adgra1	7.04701e-192	0.355101	0.459	0.232	2.5432e-187	MO	P08
Ldb2	1.18555e-190	0.306981	0.99	0.982	4.27852e-186	MO	P08
Sema6d	1.83192e-190	0.279745	0.994	0.986	6.61121e-186	MO	P08
Mdga2	4.76369e-190	0.270147	0.997	0.995	1.71917e-185	MO	P08
Socs2	6.24397e-190	0.346044	0.373	0.162	2.25339e-185	MO	P08
Syne1	1.35912e-188	0.405109	0.868	0.709	4.90493e-184	MO	P08
Nckap5	5.21585e-187	0.479485	0.735	0.528	1.88235e-182	MO	P08
Phf20l1	6.31813e-187	0.386444	0.887	0.769	2.28015e-182	MO	P08
Kcnb2	9.66092e-187	0.279908	0.994	0.982	3.48653e-182	MO	P08
Cdh11	1.05757e-183	0.429659	0.848	0.682	3.81668e-179	MO	P08
Gabra5	1.45557e-183	0.389139	0.68	0.456	5.253e-179	MO	P08
Kcnq3	5.48913e-183	0.293379	0.99	0.982	1.98097e-178	MO	P08
Atrnl1	1.04836e-176	0.352328	0.967	0.915	3.78343e-172	MO	P08
Cntnap5b	3.67832e-176	0.542121	0.828	0.688	1.32747e-171	MO	P08
Rasgrp1	1.33925e-174	0.303594	0.461	0.243	4.83323e-170	MO	P08
Gm30382	5.14346e-172	0.463631	0.934	0.822	1.85622e-167	MO	P08
Asap1	4.77617e-169	0.307813	0.951	0.905	1.72367e-164	MO	P08
Xylt1	8.91175e-169	0.299577	0.937	0.807	3.21616e-164	MO	P08
Pcdh11x	1.42326e-168	0.530853	0.673	0.478	5.1364e-164	MO	P08
Lhfp	2.8649e-166	0.440448	0.54	0.324	1.03391e-161	MO	P08
Prss12	2.55478e-164	0.30648	0.41	0.205	9.21996e-160	MO	P08
Tmtc1	2.99848e-164	0.302853	0.793	0.592	1.08212e-159	MO	P08
Etv5	5.89049e-164	0.283073	0.311	0.128	2.12582e-159	MO	P08
Arhgap26	2.80436e-163	0.351995	0.952	0.892	1.01207e-158	MO	P08
Cep112	3.0603e-157	0.437662	0.639	0.435	1.10443e-152	MO	P08
Grm8	3.35783e-156	0.344015	0.951	0.902	1.21181e-151	MO	P08
Htr4	1.03847e-154	0.304772	0.231	0.077	3.74772e-150	MO	P08
Cdh10	4.64684e-154	0.4564	0.689	0.497	1.677e-149	MO	P08
Slc26a7	1.97768e-153	0.257566	0.238	0.084	7.13723e-149	MO	P08
Ptprr	2.55994e-152	0.368898	0.781	0.607	9.23856e-148	MO	P08
Lcorl	5.32881e-152	0.37149	0.441	0.247	1.92311e-147	MO	P08
Adcy2	4.01635e-151	0.337899	0.895	0.778	1.44946e-146	MO	P08
Mctp1	2.68874e-150	0.332845	0.916	0.797	9.7034e-146	MO	P08
Rims1	4.41346e-147	0.261044	0.983	0.962	1.59277e-142	MO	P08
Meis2	1.04206e-145	0.427978	0.895	0.793	3.7607e-141	MO	P08
Prkcg	3.40741e-144	0.333799	0.899	0.803	1.2297e-139	MO	P08
Igsf21	4.62705e-144	0.361627	0.918	0.856	1.66986e-139	MO	P08
Gm15398	1.95363e-143	0.283491	0.278	0.116	7.05047e-139	MO	P08
Epha7	8.01844e-142	0.411899	0.834	0.724	2.89378e-137	MO	P08
Mpped2	1.64278e-141	0.342955	0.903	0.797	5.92863e-137	MO	P08
Wwc1	1.92556e-141	0.359199	0.898	0.816	6.94916e-137	MO	P08
Zfp385b	1.1877e-139	0.284331	0.955	0.879	4.28631e-135	MO	P08
Dmd	1.32435e-139	0.298622	0.967	0.905	4.77946e-135	MO	P08
Pappa2	1.59557e-139	0.309605	0.168	0.045	5.75827e-135	MO	P08
Zfp827	5.1703e-139	0.349836	0.763	0.6	1.86591e-134	MO	P08
Sulf2	2.87233e-136	0.34678	0.56	0.362	1.0366e-131	MO	P08
Ext1	3.25547e-134	0.268833	0.967	0.938	1.17487e-129	MO	P08
Sema3c	2.97337e-133	0.350276	0.4	0.218	1.07306e-128	MO	P08
Rab3c	6.11784e-132	0.346261	0.916	0.836	2.20787e-127	MO	P08
Ptpre	4.75065e-131	0.305306	0.767	0.593	1.71446e-126	MO	P08
Cemip	8.3613e-127	0.270462	0.35	0.178	3.01751e-122	MO	P08
Fmn1	1.18781e-126	0.325108	0.844	0.695	4.28668e-122	MO	P08
Kcnd3	2.50287e-124	0.330561	0.528	0.339	9.03259e-120	MO	P08
Stk39	1.25041e-121	0.288673	0.926	0.874	4.51259e-117	MO	P08
Tlk1	8.3977e-118	0.315301	0.689	0.517	3.03064e-113	MO	P08
Caln1	8.08498e-116	0.266872	0.949	0.9	2.91779e-111	MO	P08
Sorbs2	3.68317e-114	0.257726	0.811	0.652	1.32922e-109	MO	P08
Ntng1	6.52312e-114	0.271819	0.917	0.83	2.35413e-109	MO	P08
Frmd6	4.19614e-111	0.251322	0.395	0.226	1.51435e-106	MO	P08
Epha5	9.15768e-111	0.261037	0.989	0.978	3.30491e-106	MO	P08
Man2a1	1.21386e-105	0.335514	0.552	0.384	4.38071e-101	MO	P08
Samd4	1.31916e-105	0.26034	0.479	0.305	4.7607e-101	MO	P08
Spred2	5.96654e-105	0.254607	0.722	0.555	2.15326e-100	MO	P08
Stxbp5l	1.00503e-104	0.291411	0.844	0.721	3.62706e-100	MO	P08
Col8a1	5.31554e-104	0.295312	0.132	0.037	1.91832e-99	MO	P08
Synpr	2.03821e-100	0.299197	0.3	0.156	7.35568e-96	MO	P08
Ptpro	2.98171e-100	0.282019	0.8	0.675	1.07607e-95	MO	P08
Dtnb	3.85455e-100	0.278133	0.761	0.617	1.39107e-95	MO	P08
Sergef	3.18728e-99	0.259015	0.454	0.288	1.15026e-94	MO	P08
Ppm1l	5.6183e-98	0.274968	0.875	0.773	2.02759e-93	MO	P08
Pam	1.2442e-97	0.270298	0.505	0.336	4.4902e-93	MO	P08
Fhit	6.3966e-95	0.341988	0.746	0.613	2.30847e-90	MO	P08
Tmem163	4.51935e-90	0.273195	0.856	0.745	1.63099e-85	MO	P08
Cacnb2	4.43678e-89	0.272433	0.641	0.479	1.60119e-84	MO	P08
Grid1	2.63003e-88	0.269833	0.911	0.838	9.49153e-84	MO	P08
Gpc6	3.6661e-87	0.305323	0.961	0.928	1.32306e-82	MO	P08
Efna5	2.474e-85	0.319061	0.959	0.921	8.92841e-81	MO	P08
Focad	3.66443e-85	0.252471	0.897	0.825	1.32246e-80	MO	P08
Eps8	2.17594e-83	0.265983	0.606	0.452	7.85275e-79	MO	P08
Gabra1	6.20224e-82	0.258042	0.624	0.473	2.23833e-77	MO	P08
Sorcs3	6.83456e-82	0.38312	0.403	0.258	2.46653e-77	MO	P08
Prune2	2.26628e-80	0.283277	0.343	0.222	8.17876e-76	MO	P08
Rit2	1.26736e-72	0.257542	0.821	0.718	4.57377e-68	MO	P08
Ano3	3.01505e-71	0.253514	0.755	0.623	1.0881e-66	MO	P08
Cntnap5c	2.38641e-70	0.284435	0.676	0.543	8.61232e-66	MO	P08
Airn	2.6312e-69	0.327744	0.627	0.497	9.49575e-65	MO	P08
Tmeff2	1.51661e-51	0.332041	0.864	0.794	5.4733e-47	MO	P08
Il1rapl2	4.62289e-19	0.257413	0.23	0.175	1.66835e-14	MO	P08
Cntnap5a	2.25321e-290	0.653252	0.988	0.967	8.13159e-286	S1	P08
Sox5	1.59417e-281	0.549047	0.995	0.983	5.75321e-277	S1	P08
Bcl11a	2.05796e-248	0.712774	0.853	0.699	7.42697e-244	S1	P08
Wscd2	4.43479e-236	0.455842	0.591	0.592	1.60047e-231	S1	P08
Arid1b	6.5687e-223	0.503078	0.903	0.91	2.37058e-218	S1	P08
Nr3c1	1.1576e-199	0.300875	0.613	0.689	4.17765e-195	S1	P08
Negr1	1.9677e-195	0.47084	0.999	0.993	7.10124e-191	S1	P08
Sfxn5	4.83571e-188	0.322099	0.529	0.576	1.74516e-183	S1	P08
Hs6st3	1.25498e-187	0.501258	0.993	0.982	4.52908e-183	S1	P08
Mtcl1	1.73718e-185	0.28824	0.591	0.651	6.26931e-181	S1	P08
Sdccag8	1.68837e-183	0.341269	0.576	0.615	6.09316e-179	S1	P08
4930419G24Rik	3.3108e-179	0.381585	0.679	0.717	1.19483e-174	S1	P08
Slc24a2	1.6455e-164	0.491142	0.716	0.686	5.93846e-160	S1	P08
Sorcs2	3.51801e-163	0.338792	0.664	0.722	1.26961e-158	S1	P08
Gng7	5.67634e-161	0.253984	0.577	0.652	2.04853e-156	S1	P08
Camta1	2.13238e-160	0.417047	0.987	0.982	7.69554e-156	S1	P08
A330102I10Rik	6.63072e-159	0.336119	0.634	0.663	2.39296e-154	S1	P08
Tspan9	3.32448e-157	0.316345	0.397	0.406	1.19977e-152	S1	P08
Rgma	9.03915e-154	0.270915	0.582	0.638	3.26214e-149	S1	P08
Myrip	1.3042e-149	0.264273	0.688	0.758	4.70673e-145	S1	P08
Tcerg1l	4.83035e-148	0.417205	0.869	0.895	1.74322e-143	S1	P08
Brinp3	1.36192e-146	0.583797	0.838	0.784	4.91504e-142	S1	P08
Auts2	2.07355e-136	0.297537	0.998	0.995	7.48323e-132	S1	P08
Tmem132b	2.63011e-136	0.371589	0.8	0.826	9.49182e-132	S1	P08
Sox5os4	1.99962e-133	0.355576	0.419	0.388	7.21643e-129	S1	P08
Efna5	2.03499e-133	0.57322	0.947	0.94	7.34409e-129	S1	P08
Rgs6	3.32736e-132	0.441785	0.931	0.918	1.20081e-127	S1	P08
Maml2	7.45698e-127	0.505859	0.461	0.398	2.69115e-122	S1	P08
Ntrk2	1.28679e-126	0.354594	0.984	0.984	4.64389e-122	S1	P08
Bcl6	5.81548e-124	0.273726	0.364	0.365	2.09875e-119	S1	P08
Pde8b	1.77443e-122	0.375819	0.376	0.331	6.40374e-118	S1	P08
Npas2	7.31492e-121	0.330318	0.587	0.618	2.63988e-116	S1	P08
Ldlrad4	7.66947e-121	0.358559	0.956	0.956	2.76783e-116	S1	P08
Cdh4	2.04133e-120	0.352114	0.397	0.515	7.36695e-116	S1	P08
Nrp1	2.7375e-120	0.337531	0.76	0.783	9.87936e-116	S1	P08
Prickle1	2.95663e-119	0.32223	0.863	0.906	1.06702e-114	S1	P08
Tmem132d	4.43643e-119	0.384223	0.608	0.61	1.60106e-114	S1	P08
Kcnk2	1.17209e-118	0.383742	0.43	0.395	4.22996e-114	S1	P08
Tiam2	8.69611e-117	0.315712	0.727	0.772	3.13834e-112	S1	P08
Tmtc1	2.4197e-116	0.293914	0.669	0.704	8.73244e-112	S1	P08
Htr1f	1.17379e-115	0.521611	0.751	0.666	4.23608e-111	S1	P08
Lrrtm4	2.51215e-114	0.419422	0.999	0.998	9.06609e-110	S1	P08
A830018L16Rik	4.48138e-114	0.339341	0.916	0.937	1.61729e-109	S1	P08
Fat3	1.4764e-113	0.390653	0.939	0.932	5.32816e-109	S1	P08
Cdh20	1.02126e-111	0.440429	0.58	0.538	3.68564e-107	S1	P08
Thsd7b	1.19128e-111	0.257998	0.353	0.41	4.2992e-107	S1	P08
Rorb	3.46506e-109	0.462352	0.568	0.523	1.2505e-104	S1	P08
Fam189a1	5.94053e-109	0.334153	0.676	0.68	2.14388e-104	S1	P08
Specc1	4.6251e-107	0.324112	0.349	0.331	1.66915e-102	S1	P08
Plxna4	4.61131e-102	0.325817	0.912	0.918	1.66417e-97	S1	P08
Rbfox1	1.03399e-100	0.305538	0.999	1	3.73156e-96	S1	P08
2610307P16Rik	3.57219e-100	0.323964	0.171	0.127	1.28917e-95	S1	P08
Esrrg	1.50292e-98	0.34693	0.865	0.876	5.42389e-94	S1	P08
Atp2b2	1.79682e-98	0.277118	0.914	0.94	6.48456e-94	S1	P08
Galnt18	2.17074e-95	0.278934	0.816	0.863	7.83399e-91	S1	P08
Luzp2	3.06825e-93	0.369161	0.763	0.778	1.1073e-88	S1	P08
Nos1ap	1.00188e-91	0.29228	0.916	0.942	3.61568e-87	S1	P08
Gm44560	5.13925e-87	0.337593	0.411	0.408	1.8547e-82	S1	P08
Chrm2	1.68625e-85	0.331807	0.526	0.512	6.08551e-81	S1	P08
Arhgap15	8.67082e-85	0.267859	0.355	0.339	3.12921e-80	S1	P08
Fam20a	1.529e-84	0.294162	0.358	0.333	5.51803e-80	S1	P08
Chrm3	2.72037e-83	0.35042	0.837	0.81	9.81755e-79	S1	P08
Ust	3.27425e-83	0.300948	0.666	0.673	1.18164e-78	S1	P08
Trpm3	3.32443e-82	0.294935	0.989	0.988	1.19975e-77	S1	P08
2310067P03Rik	1.19805e-80	0.266016	0.15	0.052	4.32366e-76	S1	P08
Rora	2.67894e-79	0.471699	0.785	0.81	9.66804e-75	S1	P08
Pdzrn3	3.13151e-79	0.327507	0.596	0.579	1.13013e-74	S1	P08
Rxfp1	1.01504e-78	0.345977	0.513	0.47	3.66319e-74	S1	P08
Xist	2.97414e-78	0.457078	0.727	0.649	1.07334e-73	S1	P08
Nav2	1.67989e-77	0.280569	0.989	0.99	6.06257e-73	S1	P08
5730522E02Rik	1.48859e-76	0.319729	0.942	0.929	5.37216e-72	S1	P08
Dscam	5.68725e-75	0.260357	0.943	0.956	2.05247e-70	S1	P08
Hs3st5	2.07522e-74	0.281014	0.775	0.788	7.48924e-70	S1	P08
Spag5	3.36508e-73	0.255925	0.254	0.243	1.21442e-68	S1	P08
Olfm3	3.42587e-73	0.33813	0.281	0.238	1.23636e-68	S1	P08
Zfp804b	2.88016e-72	0.392483	0.546	0.559	1.03942e-67	S1	P08
Cdh6	3.06677e-68	0.273687	0.753	0.782	1.10677e-63	S1	P08
Cntn6	3.51048e-64	0.331433	0.921	0.936	1.2669e-59	S1	P08
Cdh18	4.74372e-64	0.252856	0.617	0.649	1.71196e-59	S1	P08
Ltbp1	2.96954e-63	0.396809	0.213	0.157	1.07168e-58	S1	P08
Trpc7	4.5466e-59	0.276321	0.241	0.199	1.64082e-54	S1	P08
Frmd5	2.03966e-58	0.26037	0.942	0.957	7.36092e-54	S1	P08
Clstn2	2.43504e-58	0.316292	0.97	0.966	8.78783e-54	S1	P08
Sv2c	3.03324e-49	0.254668	0.168	0.118	1.09466e-44	S1	P08
Trerf1	5.13281e-45	0.25798	0.403	0.403	1.85238e-40	S1	P08
Cntn4	7.54421e-41	0.288292	0.865	0.897	2.72263e-36	S1	P08
2610203C20Rik	2.70041e-38	0.305799	0.43	0.409	9.74551e-34	S1	P08
Bmpr1b	1.31654e-36	0.266642	0.16	0.098	4.75126e-32	S1	P08
Sorcs1	1.66836e-33	0.314409	0.933	0.919	6.02093e-29	S1	P08
9330162G02Rik	7.34381e-24	0.315983	0.504	0.452	2.65031e-19	S1	P08
Cntnap5a	0	0.896553	0.997	0.968	0	S2	P08
Negr1	0	0.832026	0.999	0.994	0	S2	P08
Malat1	1.49542060453468e-317	0.747058	1	1	5.39682341970521e-313	S2	P08
Pdzrn4	0	1.11194	0.769	0.58	9.88502e-305	S2	P08
Snhg11	2.06459e-284	0.463255	1	1	7.45088e-280	S2	P08
Gm36251	4.55477e-212	0.746341	0.353	0.153	1.64377e-207	S2	P08
Pdzrn3	3.61998e-211	0.858096	0.717	0.566	1.30642e-206	S2	P08
Fam19a2	4.02221e-208	0.834006	0.892	0.754	1.45158e-203	S2	P08
Pdgfc	7.75214e-187	0.659773	0.544	0.392	2.79767e-182	S2	P08
Stxbp6	8.36534e-182	1.00535	0.596	0.299	3.01897e-177	S2	P08
Mir124a-1hg	1.04973e-173	0.461602	0.601	0.576	3.78838e-169	S2	P08
Rbfox1	4.02577e-172	0.452253	0.999	1	1.45286e-167	S2	P08
Cwc22	2.53567e-167	0.840936	0.568	0.554	9.151e-163	S2	P08
Tcerg1l	1.69779e-162	0.61552	0.935	0.884	6.12715e-158	S2	P08
Ctnna3	3.60464e-151	0.695293	0.743	0.631	1.30088e-146	S2	P08
Zranb2	6.8161e-150	0.616381	0.913	0.848	2.45986e-145	S2	P08
Scube1	5.80827e-147	0.614592	0.357	0.21	2.09615e-142	S2	P08
Cyp7b1	8.15291e-146	0.631875	0.521	0.391	2.9423e-141	S2	P08
Trim35	2.89435e-145	0.428546	0.64	0.634	1.04454e-140	S2	P08
Zfp804b	1.54567e-140	0.943272	0.628	0.548	5.57817e-136	S2	P08
Gm30382	3.68394e-137	0.690881	0.949	0.872	1.3295e-132	S2	P08
AC129186.1	2.02245e-129	0.831001	0.7	0.465	7.29882e-125	S2	P08
Srsf10	1.30787e-128	0.30453	0.401	0.41	4.71995e-124	S2	P08
Sox5	1.40046e-128	0.443663	0.999	0.984	5.05411e-124	S2	P08
Slc17a7	3.47958e-128	0.337151	0.531	0.562	1.25575e-123	S2	P08
Gm5149	1.38321e-125	0.461266	0.244	0.113	4.99188e-121	S2	P08
Aff2	6.52734e-125	0.476327	0.559	0.601	2.35565e-120	S2	P08
Gm35188	7.90076e-119	0.420139	0.312	0.231	2.85131e-114	S2	P08
Htr1f	9.34252e-118	0.628459	0.818	0.666	3.37162e-113	S2	P08
Bcl6	4.40873e-116	0.442876	0.424	0.357	1.59107e-111	S2	P08
Gm47271	1.84946e-114	0.375661	0.247	0.184	6.67451e-110	S2	P08
Mir124-2hg	4.46402e-114	0.284962	0.51	0.548	1.61102e-109	S2	P08
Nrg3os	1.50527e-112	0.46096	0.735	0.742	5.43238e-108	S2	P08
Plk2	2.4486e-111	0.331429	0.347	0.317	8.83675e-107	S2	P08
Cdh4	3.76824e-109	0.773797	0.508	0.49	1.35992e-104	S2	P08
Ppid	5.05474e-109	0.309744	0.339	0.319	1.8242e-104	S2	P08
Dusp11	2.49274e-108	0.308136	0.523	0.537	8.99606e-104	S2	P08
Gm28175	3.20547e-108	0.251482	0.219	0.281	1.15682e-103	S2	P08
Srsf7	1.79531e-107	0.290161	0.593	0.634	6.47908e-103	S2	P08
Chrm2	1.98773e-107	0.569278	0.6	0.504	7.17353e-103	S2	P08
Gm20275	2.02147e-107	0.402261	0.343	0.287	7.29528e-103	S2	P08
Atp6v0b	8.99297e-107	0.416765	0.754	0.766	3.24547e-102	S2	P08
B230307C23Rik	1.60596e-105	0.338251	0.324	0.291	5.79573e-101	S2	P08
Gm48678	8.30834e-105	0.307952	0.257	0.234	2.9984e-100	S2	P08
2900055J20Rik	3.70589e-103	0.317125	0.208	0.159	1.33742e-98	S2	P08
Ftx	5.37103e-103	0.3199	0.615	0.622	1.93835e-98	S2	P08
Gm16083	5.79026e-101	0.395871	0.658	0.648	2.08965e-96	S2	P08
Nvl	7.2209e-100	0.340143	0.547	0.541	2.60595e-95	S2	P08
Kcnk9	6.37344e-99	0.345325	0.244	0.168	2.30011e-94	S2	P08
Prelid3a	1.41028e-98	0.384656	0.386	0.331	5.08957e-94	S2	P08
Acp1	1.80811e-98	0.273795	0.289	0.279	6.52527e-94	S2	P08
Lrrtm3	1.59669e-97	0.515597	0.872	0.777	5.7623e-93	S2	P08
Stmn1	1.8696e-96	0.268341	0.545	0.578	6.7472e-92	S2	P08
Sox5os4	2.51673e-96	0.443909	0.462	0.385	9.08264e-92	S2	P08
Brd9	6.65528e-96	0.300314	0.469	0.483	2.40182e-91	S2	P08
Hnrnpdl	9.1549e-96	0.265284	0.54	0.581	3.30391e-91	S2	P08
Gm28376	1.0485e-95	0.262824	0.408	0.449	3.78393e-91	S2	P08
Cdh9	5.23901e-95	0.477076	0.227	0.093	1.89071e-90	S2	P08
Asap2	1.28489e-94	0.344643	0.562	0.562	4.63702e-90	S2	P08
A230057D06Rik	1.34782e-94	0.669641	0.713	0.488	4.86413e-90	S2	P08
Ptprz1	4.01755e-94	0.271832	0.312	0.367	1.44989e-89	S2	P08
Ptprk	9.59897e-93	0.454364	0.676	0.777	3.46417e-88	S2	P08
Adgrl2	6.04287e-91	0.462762	0.861	0.818	2.18081e-86	S2	P08
Lpp	2.50842e-90	0.371113	0.646	0.63	9.05264e-86	S2	P08
Auts2	9.98638e-90	0.301529	0.999	0.996	3.60398e-85	S2	P08
Pcgf5	2.09842e-89	0.376899	0.338	0.278	7.57298e-85	S2	P08
1190002N15Rik	7.9638e-89	0.275427	0.321	0.299	2.87406e-84	S2	P08
Rorb	1.62144e-88	0.568202	0.639	0.519	5.85162e-84	S2	P08
Gm42439	1.69285e-88	0.27667	0.388	0.381	6.10932e-84	S2	P08
Ccbe1	3.25838e-88	0.545772	0.469	0.346	1.17592e-83	S2	P08
Mrpl41	5.35328e-88	0.254822	0.259	0.24	1.93195e-83	S2	P08
Gm15577	1.70913e-87	0.264516	0.185	0.121	6.16807e-83	S2	P08
Slit2	2.16165e-87	0.43984	0.884	0.859	7.80119e-83	S2	P08
C78859	1.38928e-86	0.360873	0.385	0.335	5.01379e-82	S2	P08
Gria2	2.91145e-86	0.3239	0.989	0.987	1.05071e-81	S2	P08
Rhbdl3	6.73209e-86	0.380429	0.224	0.141	2.42955e-81	S2	P08
Vrk1	1.84914e-85	0.269782	0.286	0.265	6.67337e-81	S2	P08
Rnpc3	1.91297e-85	0.304272	0.533	0.551	6.90371e-81	S2	P08
Gm48091	5.7426e-85	0.378749	0.334	0.274	2.07245e-80	S2	P08
Gsdme	2.87341e-84	0.428494	0.429	0.342	1.03698e-79	S2	P08
Bbx	1.00291e-83	0.286901	0.291	0.266	3.6194e-79	S2	P08
Arhgap15	1.72159e-83	0.455309	0.442	0.33	6.21304e-79	S2	P08
A630089N07Rik	2.31408e-83	0.288787	0.222	0.162	8.35129e-79	S2	P08
Dlg2	7.5258e-83	0.605907	0.768	0.553	2.71598e-78	S2	P08
Slc9a9	1.57652e-82	0.345275	0.781	0.797	5.68949e-78	S2	P08
Nr3c1	1.59266e-82	0.315112	0.658	0.676	5.74775e-78	S2	P08
Nyap2	2.24525e-82	0.278557	0.705	0.746	8.10287e-78	S2	P08
Lingo2	3.19877e-82	0.364188	0.998	0.997	1.15441e-77	S2	P08
4930415C11Rik	1.44415e-80	0.264263	0.249	0.213	5.21181e-76	S2	P08
Cdh18	3.44266e-79	0.596769	0.686	0.637	1.24242e-74	S2	P08
Nrsn1	6.55503e-79	0.256313	0.206	0.166	2.36564e-74	S2	P08
CT025619.1	3.52785e-78	0.401728	0.43	0.354	1.27316e-73	S2	P08
Snrpn	6.53183e-76	0.265877	0.608	0.638	2.35727e-71	S2	P08
Rab27b	1.38492e-74	0.354664	0.355	0.29	4.99804e-70	S2	P08
Eml6	2.57073e-74	0.343878	0.896	0.891	9.27752e-70	S2	P08
Sdccag8	4.19153e-73	0.305659	0.608	0.608	1.51268e-68	S2	P08
Dpyd	6.2551e-73	0.350443	0.602	0.608	2.2574e-68	S2	P08
Gm40841	1.31374e-72	0.478468	0.528	0.409	4.74117e-68	S2	P08
Slc16a2	3.71066e-72	0.300937	0.533	0.555	1.33914e-67	S2	P08
Cdh7	1.47548e-71	0.283845	0.394	0.381	5.32486e-67	S2	P08
Camk2a	1.52918e-71	0.360264	0.848	0.825	5.51866e-67	S2	P08
Arid1b	2.6616e-71	0.369044	0.897	0.91	9.60543e-67	S2	P08
A330102I10Rik	5.04692e-71	0.268338	0.628	0.661	1.82138e-66	S2	P08
Gtdc1	8.21264e-71	0.332247	0.843	0.845	2.96386e-66	S2	P08
Kirrel3	9.53141e-71	0.424867	0.98	0.973	3.43979e-66	S2	P08
Psip1	1.16502e-70	0.276708	0.663	0.675	4.20445e-66	S2	P08
BC005561	2.95445e-70	0.334237	0.76	0.752	1.06623e-65	S2	P08
Kcnk2	7.72241e-70	0.407858	0.459	0.395	2.78694e-65	S2	P08
Gm15155	1.55116e-69	0.405401	0.759	0.736	5.598e-65	S2	P08
Hnrnpa2b1	2.13534e-69	0.3158	0.718	0.72	7.70622e-65	S2	P08
Maml3	3.13936e-69	0.428709	0.346	0.269	1.13296e-64	S2	P08
Srsf11	3.84506e-68	0.309704	0.737	0.733	1.38764e-63	S2	P08
Syn2	2.15291e-67	0.283031	0.683	0.696	7.76964e-63	S2	P08
Ttc14	2.01333e-66	0.252235	0.804	0.832	7.26592e-62	S2	P08
Large1	1.56102e-65	0.33879	0.979	0.979	5.63357e-61	S2	P08
Cdh2	1.8195e-65	0.347718	0.823	0.802	6.56639e-61	S2	P08
Klhl14	2.27616e-65	0.332314	0.111	0.022	8.21442e-61	S2	P08
Zfp644	2.66326e-65	0.252335	0.331	0.31	9.61146e-61	S2	P08
Shisa6	3.76311e-65	0.285163	0.135	0.129	1.35807e-60	S2	P08
AC165953.2	1.80399e-64	0.261984	0.35	0.329	6.51042e-60	S2	P08
Cntnap2	1.96667e-63	0.273149	0.999	0.999	7.0975e-59	S2	P08
Babam2	5.15811e-63	0.269612	0.335	0.314	1.86151e-58	S2	P08
A830036E02Rik	7.1045e-63	0.297056	0.198	0.129	2.56394e-58	S2	P08
Cacna1e	1.94499e-62	0.315942	0.965	0.97	7.01927e-58	S2	P08
Kctd16	1.09974e-61	0.444978	0.71	0.616	3.96886e-57	S2	P08
Lin7a	9.62221e-61	0.270657	0.374	0.358	3.47256e-56	S2	P08
Sv2b	3.41361e-59	0.284171	0.84	0.854	1.23194e-54	S2	P08
Ube3a	4.12936e-59	0.344749	0.898	0.904	1.49024e-54	S2	P08
Luzp2	5.14199e-59	0.402302	0.767	0.776	1.85569e-54	S2	P08
Mbnl2	2.7321e-57	0.252178	0.798	0.817	9.85987e-53	S2	P08
Slc35f4	7.68157e-57	0.30031	0.587	0.566	2.7722e-52	S2	P08
Epha3	1.03423e-55	0.333447	0.56	0.514	3.73243e-51	S2	P08
Cdh6	1.59671e-55	0.250367	0.727	0.782	5.76236e-51	S2	P08
Cnksr2	3.20991e-55	0.287875	0.975	0.975	1.15842e-50	S2	P08
Plcb4	3.25674e-54	0.267901	0.686	0.689	1.17533e-49	S2	P08
Luc7l2	3.51806e-54	0.261193	0.876	0.894	1.26963e-49	S2	P08
Thsd7a	1.67065e-53	0.300416	0.287	0.23	6.02921e-49	S2	P08
Samd12	1.53836e-52	0.286198	0.891	0.9	5.55179e-48	S2	P08
Col25a1	1.4309e-51	0.271263	0.153	0.096	5.16398e-47	S2	P08
Lama2	1.82638e-51	0.33884	0.102	0.042	6.59123e-47	S2	P08
Oxr1	2.36691e-51	0.350801	0.808	0.814	8.54193e-47	S2	P08
Nexmif	6.25432e-51	0.293075	0.391	0.353	2.25712e-46	S2	P08
Rsrp1	6.27184e-51	0.281803	0.81	0.798	2.26344e-46	S2	P08
Parm1	8.31386e-51	0.265598	0.324	0.302	3.00039e-46	S2	P08
Slc35f1	1.80953e-50	0.405699	0.824	0.797	6.5304e-46	S2	P08
Trpc7	2.32617e-50	0.344292	0.297	0.196	8.39493e-46	S2	P08
Frmd5	1.51986e-49	0.347857	0.956	0.954	5.48501e-45	S2	P08
Klhl1	6.17644e-49	0.399013	0.656	0.569	2.22902e-44	S2	P08
Sv2c	1.23842e-47	0.332668	0.175	0.122	4.46934e-43	S2	P08
Slf2	8.88e-47	0.257296	0.398	0.361	3.2047e-42	S2	P08
Fgf12	4.29382e-45	0.295142	0.98	0.973	1.5496e-40	S2	P08
Fam189a1	5.84737e-44	0.316213	0.734	0.672	2.11026e-39	S2	P08
Rasgef1b	2.83302e-41	0.44758	0.623	0.461	1.02241e-36	S2	P08
Edil3	5.70926e-40	0.313242	0.725	0.69	2.06042e-35	S2	P08
A830018L16Rik	8.07989e-40	0.312099	0.919	0.934	2.91595e-35	S2	P08
5730522E02Rik	1.44818e-39	0.274382	0.955	0.929	5.22634e-35	S2	P08
Lrrtm4	5.03203e-39	0.256029	0.998	0.999	1.81601e-34	S2	P08
Cdh20	6.36397e-39	0.300429	0.567	0.543	2.29669e-34	S2	P08
Tcf25	4.50516e-37	0.386055	0.6	0.468	1.62587e-32	S2	P08
Pbx1	8.45827e-37	0.266966	0.976	0.967	3.05251e-32	S2	P08
Shisa9	9.06183e-36	0.30995	0.87	0.891	3.27032e-31	S2	P08
Adamts18	5.60784e-31	0.255979	0.446	0.429	2.02381e-26	S2	P08
Chrm3	7.87587e-31	0.270598	0.839	0.812	2.84232e-26	S2	P08
Satb2	9.53326e-31	0.265979	0.724	0.779	3.44046e-26	S2	P08
Fstl4	1.75349e-26	0.301828	0.552	0.458	6.32817e-22	S2	P08
Nsd3	4.55243e-26	0.299892	0.526	0.434	1.64292e-21	S2	P08
Xist	3.63766e-25	0.285897	0.748	0.654	1.31279e-20	S2	P08
AC121788.1	5.69246e-19	0.342474	0.19	0.185	2.05435e-14	S2	P08
Tenm3	0	2.34647	0.994	0.758	0	Vis	P08
Adamtsl1	0	1.68544	0.867	0.291	0	Vis	P08
AC149090.1	0	1.48907	0.915	0.333	0	Vis	P08
Reln	0	1.38976	0.945	0.555	0	Vis	P08
Egfem1	0	1.35631	0.842	0.345	0	Vis	P08
Unc5d	0	1.29511	0.838	0.438	0	Vis	P08
Kcnab1	0	1.20333	0.759	0.291	0	Vis	P08
AC129186.1	0	1.148	0.958	0.395	0	Vis	P08
Cntn3	0	1.14769	0.997	0.925	0	Vis	P08
Rasgef1b	0	1.11578	0.974	0.378	0	Vis	P08
Utrn	0	1.07083	0.933	0.567	0	Vis	P08
Cpne4	0	1.05673	0.742	0.25	0	Vis	P08
Pbx3	0	1.02829	0.767	0.417	0	Vis	P08
Tshz3	0	1.01635	0.915	0.425	0	Vis	P08
Rtl4	0	1.01313	0.865	0.28	0	Vis	P08
Runx1t1	0	0.995222	0.939	0.541	0	Vis	P08
5730522E02Rik	0	0.981454	0.994	0.919	0	Vis	P08
Tuba1a	0	0.942979	0.966	0.518	0	Vis	P08
Tenm2	0	0.942486	1	0.991	0	Vis	P08
Bcl11a	0	0.939214	0.982	0.677	0	Vis	P08
Gm40841	0	0.926658	0.923	0.32	0	Vis	P08
Ncald	0	0.922092	0.864	0.465	0	Vis	P08
Galnt17	0	0.898927	0.781	0.183	0	Vis	P08
Gm42418	0	0.898767	1	0.948	0	Vis	P08
Hectd4	0	0.874987	0.947	0.357	0	Vis	P08
Dlg2	0	0.87154	1	0.49	0	Vis	P08
Rxfp1	0	0.853363	0.884	0.395	0	Vis	P08
Gm45881	0	0.822296	0.62	0.137	0	Vis	P08
A230057D06Rik	0	0.821983	0.977	0.418	0	Vis	P08
Ripor2	0	0.773143	0.789	0.204	0	Vis	P08
4930587E11Rik	0	0.769557	0.689	0.149	0	Vis	P08
Nsd2	0	0.769442	0.883	0.289	0	Vis	P08
Gm47283	0	0.755183	0.853	0.289	0	Vis	P08
AY036118	0	0.74454	0.934	0.334	0	Vis	P08
Nsd3	0	0.743141	0.925	0.345	0	Vis	P08
Cdh8	0	0.73308	0.993	0.892	0	Vis	P08
Fgf12	0	0.732003	0.999	0.968	0	Vis	P08
Stac	0	0.7259	0.692	0.27	0	Vis	P08
Fn1	0	0.707504	0.304	0.026	0	Vis	P08
Dynlt1a	0	0.702075	0.577	0.078	0	Vis	P08
Dync1i2	0	0.692458	0.987	0.842	0	Vis	P08
Vcan	0	0.691535	0.851	0.468	0	Vis	P08
Tcf25	0	0.677415	0.952	0.387	0	Vis	P08
Nexmif	0	0.662511	0.812	0.263	0	Vis	P08
Pabpn1	0	0.660712	0.889	0.329	0	Vis	P08
Slf2	0	0.656079	0.842	0.267	0	Vis	P08
Tmem181a	0	0.633308	0.845	0.395	0	Vis	P08
Las1l	0	0.633057	0.921	0.555	0	Vis	P08
Fnbp1l	0	0.629156	0.995	0.908	0	Vis	P08
Chl1	0	0.62813	0.988	0.889	0	Vis	P08
Cmss1	0	0.623408	0.95	0.577	0	Vis	P08
Tubb3	0	0.615534	0.653	0.121	0	Vis	P08
Gucy1b1	0	0.603931	0.794	0.266	0	Vis	P08
Hdgfl3	0	0.602414	0.779	0.236	0	Vis	P08
Smpd3	0	0.598001	0.621	0.096	0	Vis	P08
Clk1	0	0.584542	0.917	0.524	0	Vis	P08
Nisch	0	0.583354	0.944	0.623	0	Vis	P08
Tiam1	0	0.57977	0.938	0.594	0	Vis	P08
Zfp618	0	0.577582	0.609	0.147	0	Vis	P08
Tmem131l	0	0.573396	0.774	0.246	0	Vis	P08
Actb	0	0.567098	0.833	0.396	0	Vis	P08
Tubb2b	0	0.565861	0.706	0.215	0	Vis	P08
Taf1d	0	0.562353	0.899	0.506	0	Vis	P08
Jpt1	0	0.561934	0.646	0.14	0	Vis	P08
Tubb5	0	0.55464	0.747	0.26	0	Vis	P08
Gsdme	0	0.535658	0.781	0.264	0	Vis	P08
Prelid3a	0	0.530977	0.77	0.248	0	Vis	P08
CT025619.1	0	0.528836	0.795	0.274	0	Vis	P08
Fam19a1	0	0.524523	1	1	0	Vis	P08
Tubb2a	0	0.520292	0.769	0.298	0	Vis	P08
Ice1	0	0.514487	0.937	0.571	0	Vis	P08
Zfp644	0	0.509336	0.737	0.225	0	Vis	P08
Cop1	0	0.504994	0.721	0.213	0	Vis	P08
Lnpk	0	0.502236	0.688	0.194	0	Vis	P08
Gm49171	0	0.496143	0.359	0.046	0	Vis	P08
Mindy2	0	0.493066	0.66	0.182	0	Vis	P08
Mrps5	0	0.488546	0.835	0.406	0	Vis	P08
Pde8b	0	0.487558	0.724	0.26	0	Vis	P08
Rnpc3	0	0.485062	0.886	0.48	0	Vis	P08
Mia2	0	0.483734	0.68	0.191	0	Vis	P08
Erg	0	0.482832	0.341	0.038	0	Vis	P08
Fam196b	0	0.481148	0.299	0.014	0	Vis	P08
Actg1	0	0.480622	0.647	0.192	0	Vis	P08
Gm49179	0	0.478744	0.548	0.085	0	Vis	P08
Pcsk6	0	0.473901	0.559	0.15	0	Vis	P08
Abca8a	0	0.467845	0.434	0.091	0	Vis	P08
Nasp	0	0.460247	0.765	0.334	0	Vis	P08
Adamts3	0	0.457124	0.459	0.088	0	Vis	P08
AC165953.2	0	0.457026	0.737	0.248	0	Vis	P08
Limch1	0	0.452903	0.544	0.156	0	Vis	P08
Gm20275	0	0.449619	0.683	0.213	0	Vis	P08
Ppp4r3a	0	0.445737	0.632	0.166	0	Vis	P08
Dcaf1	0	0.444445	0.61	0.146	0	Vis	P08
Gnb2	0	0.426469	0.574	0.129	0	Vis	P08
Tspoap1	0	0.424778	0.683	0.209	0	Vis	P08
Dnaja1	0	0.424503	0.702	0.269	0	Vis	P08
Gm49353	0	0.421613	0.682	0.215	0	Vis	P08
Ly6h	0	0.419088	0.807	0.403	0	Vis	P08
Snx32	0	0.414904	0.709	0.29	0	Vis	P08
Bicdl1	0	0.409711	0.745	0.269	0	Vis	P08
Rnf180	0	0.405517	0.605	0.217	0	Vis	P08
Babam2	0	0.405161	0.69	0.24	0	Vis	P08
Dalrd3	0	0.404431	0.6	0.183	0	Vis	P08
Retreg1	0	0.400425	0.614	0.191	0	Vis	P08
Epb41	0	0.397211	0.627	0.24	0	Vis	P08
Spats2l	0	0.394941	0.477	0.119	0	Vis	P08
D830024N08Rik	0	0.392245	0.619	0.181	0	Vis	P08
Washc4	0	0.39152	0.523	0.106	0	Vis	P08
Tox2	0	0.391219	0.513	0.147	0	Vis	P08
Carmil3	0	0.387595	0.696	0.293	0	Vis	P08
Washc2	0	0.385328	0.6	0.164	0	Vis	P08
Gm48678	0	0.379383	0.588	0.164	0	Vis	P08
C78859	0	0.374014	0.726	0.261	0	Vis	P08
Virma	0	0.372833	0.614	0.178	0	Vis	P08
Gm48512	0	0.372107	0.576	0.164	0	Vis	P08
Ppia	0	0.368938	0.692	0.291	0	Vis	P08
Ppp4r3b	0	0.368516	0.576	0.159	0	Vis	P08
Eipr1	0	0.365844	0.609	0.184	0	Vis	P08
Bicral	0	0.36555	0.511	0.118	0	Vis	P08
Zfp57	0	0.364276	0.574	0.181	0	Vis	P08
Mindy3	0	0.361086	0.536	0.145	0	Vis	P08
Hsp90ab1	0	0.360968	0.784	0.381	0	Vis	P08
Gm35188	0	0.359179	0.577	0.171	0	Vis	P08
Cnot3	0	0.35863	0.617	0.225	0	Vis	P08
Gm48742	0	0.3582	0.449	0.099	0	Vis	P08
4930570B17Rik	0	0.356306	0.534	0.146	0	Vis	P08
Hsp90aa1	0	0.355453	0.661	0.243	0	Vis	P08
Hspa8	0	0.355061	0.496	0.127	0	Vis	P08
Ttc4	0	0.354388	0.643	0.243	0	Vis	P08
Gucy1a1	0	0.352123	0.584	0.201	0	Vis	P08
Togaram1	0	0.343798	0.537	0.154	0	Vis	P08
Bicra	0	0.343728	0.527	0.142	0	Vis	P08
Brd9	0	0.343157	0.816	0.413	0	Vis	P08
Spindoc	0	0.342541	0.547	0.154	0	Vis	P08
Ppp6r2	0	0.338623	0.779	0.388	0	Vis	P08
Cpne2	0	0.330768	0.637	0.243	0	Vis	P08
AC161199.1	0	0.328993	0.469	0.114	0	Vis	P08
Bclaf3	0	0.319658	0.51	0.139	0	Vis	P08
Cpne6	0	0.313536	0.681	0.291	0	Vis	P08
4930415C11Rik	0	0.307648	0.531	0.152	0	Vis	P08
Zfp512b	0	0.304553	0.545	0.178	0	Vis	P08
Vars	0	0.30063	0.513	0.161	0	Vis	P08
Slc25a3	0	0.297463	0.651	0.276	0	Vis	P08
Ate1	0	0.294797	0.568	0.179	0	Vis	P08
Bhlhe22	0	0.286025	0.379	0.071	0	Vis	P08
Ptma	0	0.285728	0.398	0.087	0	Vis	P08
Rusc1	0	0.285655	0.487	0.137	0	Vis	P08
C230057M02Rik	0	0.283871	0.456	0.118	0	Vis	P08
Cbx6	0	0.281809	0.464	0.124	0	Vis	P08
Otulin	0	0.273185	0.537	0.186	0	Vis	P08
Dctn1	0	0.272304	0.607	0.244	0	Vis	P08
Plpbp	0	0.270443	0.455	0.127	0	Vis	P08
Tle2	0	0.265465	0.478	0.142	0	Vis	P08
Gm42303	0	0.263892	0.497	0.157	0	Vis	P08
Flvcr1	0	0.261491	0.427	0.108	0	Vis	P08
Slc12a6	0	0.258524	0.414	0.1	0	Vis	P08
A830010M20Rik	0	0.256969	0.418	0.107	0	Vis	P08
Cryzl1	0	0.254629	0.428	0.107	0	Vis	P08
Gapdh	0	0.254544	0.439	0.119	0	Vis	P08
Hnrnph1	4.94065645841247e-324	0.316661	0.699	0.315	1.78303350927647e-319	Vis	P08
Robo1	3.17540190140159e-317	0.655848	0.998	0.974	1.14597079219682e-312	Vis	P08
Cetn3	4.47340872448329e-314	0.294974	0.566	0.212	0	Vis	P08
Flna	6.33878830415995e-314	0.421483	0.864	0.478	0	Vis	P08
Nr2f1	1.89788981348324e-312	0.30699	0.435	0.119	6.84929e-308	Vis	P08
Zdhhc23	3.96621106533899e-312	0.272065	0.518	0.184	1.43137e-307	Vis	P08
Fgf13	2.03080407739637e-311	0.704874	0.855	0.49	7.32897e-307	Vis	P08
Ppip5k2	3.6835146398386e-311	0.353281	0.699	0.315	1.32934e-306	Vis	P08
Gm45352	2.59185283866028e-310	0.329545	0.386	0.086	9.35374e-306	Vis	P08
Plppr3	0	0.330179	0.782	0.399	6.93235e-305	Vis	P08
Htr2a	2.61482e-307	0.73848	0.716	0.334	9.43661e-303	Vis	P08
Npnt	2.04972e-305	0.521683	0.513	0.156	7.39725e-301	Vis	P08
Fam133b	2.59409e-305	0.279075	0.625	0.268	9.36182e-301	Vis	P08
Id2	3.53103e-305	0.280451	0.449	0.138	1.27431e-300	Vis	P08
Sfpq	1.84632e-304	0.520986	0.969	0.695	6.66319e-300	Vis	P08
Ttc28	2.99812e-303	0.721039	0.899	0.555	1.08199e-298	Vis	P08
Cep70	4.32188e-303	0.318466	0.681	0.309	1.55972e-298	Vis	P08
Camk2d	3.09093e-299	0.615768	0.797	0.408	1.11549e-294	Vis	P08
Txlna	6.45547e-298	0.252458	0.487	0.168	2.32971e-293	Vis	P08
Hnrnpk	2.21614e-296	0.252516	0.581	0.241	7.99782e-292	Vis	P08
Gm48749	5.32801e-296	0.306687	0.27	0.033	1.92282e-291	Vis	P08
Tuba1b	5.84412e-296	0.311217	0.493	0.16	2.10909e-291	Vis	P08
Zc3h8	9.91309e-296	0.306332	0.61	0.253	3.57753e-291	Vis	P08
Rimklb	1.25158e-295	0.365185	0.675	0.297	4.51682e-291	Vis	P08
Gdi1	2.33137e-295	0.278428	0.683	0.321	8.4137e-291	Vis	P08
Vrk2	1.58177e-293	0.332936	0.395	0.1	5.70846e-289	Vis	P08
Asap2	3.67047e-292	0.407139	0.869	0.499	1.32464e-287	Vis	P08
Srsf5	3.64903e-291	0.411742	0.881	0.515	1.3169e-286	Vis	P08
Klf12	3.74133e-290	0.57017	0.868	0.505	1.35021e-285	Vis	P08
Slc38a2	5.92556e-290	0.352346	0.567	0.212	2.13848e-285	Vis	P08
Rpl10a	4.17299e-289	0.251218	0.432	0.133	1.50599e-284	Vis	P08
Son	1.06371e-288	0.545829	0.984	0.813	3.83883e-284	Vis	P08
Dusp11	3.28236e-288	0.325934	0.838	0.474	1.18457e-283	Vis	P08
Ccdc39	8.69977e-288	0.323087	0.709	0.34	3.13966e-283	Vis	P08
Hdac7	1.27056e-287	0.274815	0.546	0.21	4.58533e-283	Vis	P08
Psd	2.81063e-287	0.267385	0.647	0.295	1.01433e-282	Vis	P08
Calm1	3.96452e-287	0.374628	0.905	0.555	1.43075e-282	Vis	P08
Spock3	6.03936e-287	0.567256	0.452	0.122	2.17954e-282	Vis	P08
Uchl1	1.66083e-286	0.307001	0.777	0.411	5.99377e-282	Vis	P08
Gria4	4.03828e-286	0.722197	0.927	0.654	1.45738e-281	Vis	P08
Timm44	6.83496e-286	0.324644	0.851	0.488	2.46667e-281	Vis	P08
Rac3	1.56192e-285	0.286742	0.545	0.209	5.63683e-281	Vis	P08
Prpf4b	1.85109e-285	0.531712	0.981	0.771	6.68039e-281	Vis	P08
Lars2	7.00612e-285	0.344096	0.64	0.279	2.52844e-280	Vis	P08
Ivns1abp	7.15692e-285	0.281114	0.667	0.311	2.58286e-280	Vis	P08
Dcc	1.87544e-284	1.84177	0.721	0.383	6.76826e-280	Vis	P08
Faap100	4.47007e-284	0.251103	0.52	0.197	1.6132e-279	Vis	P08
Kidins220	5.62163e-283	0.506832	0.984	0.852	2.02879e-278	Vis	P08
Dhx36	5.92102e-282	0.271136	0.736	0.381	2.13684e-277	Vis	P08
Trank1	7.03909e-282	0.368592	0.769	0.397	2.54034e-277	Vis	P08
Supt20	2.29213e-281	0.333184	0.77	0.402	8.27208e-277	Vis	P08
Rps8	4.91967e-281	0.316991	0.522	0.191	1.77546e-276	Vis	P08
Sorbs1	1.02733e-280	0.527032	0.98	0.804	3.70752e-276	Vis	P08
Limk2	3.1834e-279	0.303038	0.725	0.364	1.14886e-274	Vis	P08
Stk32b	9.41577e-279	0.26377	0.482	0.171	3.39806e-274	Vis	P08
Jak2	1.01738e-278	0.298034	0.7	0.343	3.67163e-274	Vis	P08
Hmgb1	5.92892e-278	0.328071	0.76	0.396	2.13969e-273	Vis	P08
C130073E24Rik	1.38307e-277	0.40523	0.218	0.016	4.99135e-273	Vis	P08
Podxl2	1.44715e-277	0.270615	0.727	0.373	5.22263e-273	Vis	P08
Tmem44	4.33093e-277	0.359696	0.732	0.364	1.56299e-272	Vis	P08
Eif2s2	9.64785e-276	0.309083	0.62	0.272	3.48181e-271	Vis	P08
Paxbp1	1.15925e-275	0.363184	0.889	0.54	4.18363e-271	Vis	P08
Pfkp	1.49038e-275	0.517908	0.996	0.948	5.37864e-271	Vis	P08
Tcf12	4.80673e-275	0.623195	0.89	0.572	1.7347e-270	Vis	P08
Hnrnpa1	3.57567e-274	0.26594	0.414	0.122	1.29042e-269	Vis	P08
Cpt1c	2.05994e-272	0.277924	0.653	0.307	7.4341e-268	Vis	P08
Tia1	7.01114e-270	0.404834	0.896	0.553	2.53025e-265	Vis	P08
Eef1a1	2.87455e-269	0.258948	0.596	0.265	1.0374e-264	Vis	P08
Cntrl	1.03948e-268	0.296812	0.619	0.277	3.75139e-264	Vis	P08
Gm32647	2.77209e-268	0.533618	0.277	0.039	1.00042e-263	Vis	P08
Otx1	5.44139e-268	0.391763	0.315	0.055	1.96374e-263	Vis	P08
Xrn2	8.38548e-268	0.327809	0.842	0.49	3.02623e-263	Vis	P08
Csrp2	1.26851e-267	0.262554	0.35	0.086	4.57791e-263	Vis	P08
Ddx5	4.74691e-267	0.475862	0.941	0.645	1.71311e-262	Vis	P08
Gmip	7.41099e-267	0.26626	0.606	0.274	2.67455e-262	Vis	P08
Gpc1	2.37247e-266	0.281434	0.723	0.372	8.56199e-262	Vis	P08
Tnrc6a	2.60746e-266	0.270754	0.793	0.447	9.41006e-262	Vis	P08
Thoc1	3.54591e-266	0.363837	0.833	0.474	1.27968e-261	Vis	P08
Myef2	1.15402e-262	0.407962	0.867	0.517	4.16474e-258	Vis	P08
C1qtnf4	1.66989e-262	0.260452	0.559	0.237	6.02645e-258	Vis	P08
Tnfrsf19	6.36814e-262	0.386	0.774	0.411	2.2982e-257	Vis	P08
Abca5	9.02032e-262	0.276655	0.646	0.307	3.25534e-257	Vis	P08
Kdm1a	1.69313e-261	0.383007	0.893	0.555	6.11032e-257	Vis	P08
Uggt2	3.00194e-261	0.332552	0.788	0.433	1.08337e-256	Vis	P08
Top2b	3.85829e-261	0.27729	0.765	0.419	1.39242e-256	Vis	P08
Enc1	1.01992e-260	0.288289	0.557	0.23	3.68078e-256	Vis	P08
Sorcs1	1.96173e-260	1.14882	0.988	0.908	7.07968e-256	Vis	P08
Gng4	2.62971e-260	0.261039	0.402	0.12	9.49036e-256	Vis	P08
Acvr2a	7.15519e-260	0.288314	0.686	0.34	2.58224e-255	Vis	P08
Matr3	2.11893e-258	0.264821	0.687	0.35	7.64702e-254	Vis	P08
Uimc1	4.56296e-258	0.265203	0.688	0.349	1.64673e-253	Vis	P08
Lrrn3	1.08524e-257	0.38053	0.578	0.236	3.91653e-253	Vis	P08
Hs3st4	1.91245e-256	0.922478	0.683	0.339	6.90185e-252	Vis	P08
Lrp2	2.03894e-256	0.341147	0.217	0.02	7.35833e-252	Vis	P08
Rpsa	6.05831e-256	0.286692	0.457	0.156	2.18639e-251	Vis	P08
Tmtc2	1.01582e-255	0.972878	0.944	0.754	3.66598e-251	Vis	P08
Prpf39	1.97653e-255	0.264585	0.802	0.462	7.13311e-251	Vis	P08
Agrn	2.73405e-255	0.284952	0.777	0.434	9.8669e-251	Vis	P08
Gm42439	6.85822e-254	0.340439	0.671	0.322	2.47506e-249	Vis	P08
Postn	1.60805e-253	0.337676	0.426	0.132	5.80328e-249	Vis	P08
Sesn3	1.2067e-252	0.288029	0.545	0.226	4.35485e-248	Vis	P08
Disp1	5.32921e-252	0.251102	0.509	0.204	1.92326e-247	Vis	P08
Arhgap29	3.14661e-251	0.425003	0.656	0.299	1.13558e-246	Vis	P08
Wsb1	1.10514e-250	0.263987	0.727	0.39	3.98833e-246	Vis	P08
Dpy19l1	2.63229e-250	0.366823	0.688	0.336	9.49967e-246	Vis	P08
Pcsk1n	5.9207e-249	0.266183	0.424	0.141	2.13672e-244	Vis	P08
Cntn6	2.71964e-248	0.576972	0.996	0.92	9.8149e-244	Vis	P08
Ddx39b	3.79462e-247	0.268868	0.798	0.461	1.36944e-242	Vis	P08
Hnrnpa2b1	3.90338e-247	0.450833	0.948	0.673	1.40869e-242	Vis	P08
Fxr1	9.55406e-247	0.363029	0.862	0.524	3.44797e-242	Vis	P08
Ank1	3.38747e-246	0.320136	0.763	0.42	1.22251e-241	Vis	P08
Cox4i1	4.07533e-246	0.262069	0.33	0.083	1.47075e-241	Vis	P08
Nap1l1	7.95275e-246	0.264932	0.761	0.426	2.87007e-241	Vis	P08
Nab1	1.08913e-244	0.273767	0.704	0.37	3.93058e-240	Vis	P08
Fam208a	1.36858e-244	0.256799	0.679	0.352	4.93907e-240	Vis	P08
U2surp	4.11416e-243	0.287002	0.827	0.495	1.48476e-238	Vis	P08
Hnrnpdl	2.05116e-242	0.341164	0.854	0.519	7.40244e-238	Vis	P08
Npas3	1.09589e-240	0.759339	0.545	0.215	3.95496e-236	Vis	P08
Serbp1	3.1079e-240	0.307202	0.653	0.319	1.12161e-235	Vis	P08
Zcchc18	1.05705e-239	0.315674	0.839	0.505	3.81478e-235	Vis	P08
Rps24	8.19959e-237	0.255212	0.396	0.127	2.95915e-232	Vis	P08
Stmn1	1.88002e-236	0.318899	0.847	0.518	6.78481e-232	Vis	P08
Col24a1	3.58418e-236	0.423995	0.338	0.084	1.29349e-231	Vis	P08
Pik3c2a	1.25426e-235	0.292428	0.717	0.385	4.52651e-231	Vis	P08
Lmo7	1.17314e-234	0.436815	0.901	0.591	4.23375e-230	Vis	P08
Lmo4	1.89796e-234	0.375885	0.503	0.188	6.84956e-230	Vis	P08
Slc24a5	2.93368e-234	0.257769	0.49	0.192	1.05874e-229	Vis	P08
Spire1	3.95516e-234	0.339605	0.867	0.542	1.42738e-229	Vis	P08
Cdh2	8.30804e-234	0.526084	0.963	0.772	2.99829e-229	Vis	P08
Metap2	5.88523e-231	0.255176	0.746	0.422	2.12392e-226	Vis	P08
Nbeal1	9.11535e-231	0.264643	0.814	0.493	3.28964e-226	Vis	P08
Fam19a2	1.35279e-230	0.565684	0.958	0.731	4.8821e-226	Vis	P08
Unc13c	2.43321e-230	0.401283	0.335	0.082	8.78121e-226	Vis	P08
Luc7l3	3.37767e-230	0.439892	0.986	0.803	1.21897e-225	Vis	P08
Gkap1	7.83534e-230	0.280127	0.505	0.204	2.82769e-225	Vis	P08
Igf2bp2	8.25978e-230	0.319576	0.472	0.179	2.98087e-225	Vis	P08
A330015K06Rik	1.34875e-229	0.3322	0.356	0.094	4.86751e-225	Vis	P08
Unc13b	2.68956e-229	0.481638	0.976	0.833	9.70634e-225	Vis	P08
Cd47	2.88176e-229	0.286673	0.779	0.451	1.04e-224	Vis	P08
St8sia2	1.00383e-228	0.385475	0.602	0.272	3.62274e-224	Vis	P08
Sgk3	4.49313e-226	0.262444	0.741	0.419	1.62152e-221	Vis	P08
Dixdc1	4.93805e-226	0.336001	0.776	0.443	1.78209e-221	Vis	P08
Edil3	5.01935e-226	0.513265	0.923	0.647	1.81143e-221	Vis	P08
Vps13c	1.10068e-225	0.298372	0.856	0.539	3.97226e-221	Vis	P08
Galnt14	1.43392e-225	0.468755	0.834	0.504	5.17488e-221	Vis	P08
Susd4	8.07044e-225	0.268109	0.72	0.399	2.91254e-220	Vis	P08
Pde7b	1.00567e-224	0.308259	0.334	0.087	3.62935e-220	Vis	P08
Anapc5	2.34243e-223	0.292546	0.843	0.525	8.45359e-219	Vis	P08
Piezo1	1.35033e-222	0.259657	0.372	0.115	4.87322e-218	Vis	P08
Ssbp2	9.50095e-222	0.447717	0.99	0.933	3.4288e-217	Vis	P08
Fat4	2.50036e-221	0.286773	0.615	0.298	9.02356e-217	Vis	P08
Satb1	4.79422e-221	0.357741	0.736	0.406	1.73019e-216	Vis	P08
Ehbp1	3.03278e-220	0.575153	0.976	0.873	1.0945e-215	Vis	P08
Cadm1	6.45499e-219	0.566108	0.993	0.917	2.32954e-214	Vis	P08
Dpysl3	7.77269e-218	0.438071	0.968	0.773	2.80509e-213	Vis	P08
Samd5	1.33223e-217	0.702478	0.595	0.283	4.80789e-213	Vis	P08
Lgr4	1.34369e-217	0.433374	0.593	0.265	4.84923e-213	Vis	P08
Neto2	2.01299e-216	0.2918	0.715	0.395	7.26469e-212	Vis	P08
Prodh	3.95304e-216	0.28335	0.424	0.148	1.42661e-211	Vis	P08
Arglu1	2.02924e-214	0.385979	0.934	0.662	7.32333e-210	Vis	P08
Prkd1	4.62333e-214	0.399613	0.73	0.401	1.66852e-209	Vis	P08
Rufy3	1.40824e-213	0.437528	0.957	0.731	5.08221e-209	Vis	P08
Yeats2	6.95776e-213	0.278921	0.835	0.524	2.51099e-208	Vis	P08
Auts2	2.33803e-212	0.370872	0.999	0.995	8.43771e-208	Vis	P08
Sacs	1.41727e-211	0.269051	0.811	0.501	5.11479e-207	Vis	P08
Rufy2	7.21157e-210	0.299473	0.915	0.629	2.60258e-205	Vis	P08
Kctd16	9.00215e-210	0.525553	0.874	0.576	3.24878e-205	Vis	P08
Man1a2	4.15984e-209	0.297857	0.858	0.554	1.50125e-204	Vis	P08
Rasa1	5.98256e-209	0.25289	0.805	0.499	2.15905e-204	Vis	P08
Cblb	1.20514e-208	0.369521	0.72	0.394	4.34923e-204	Vis	P08
Rbm5	8.20857e-207	0.421892	0.969	0.769	2.96239e-202	Vis	P08
Matk	1.35535e-206	0.275422	0.875	0.58	4.89131e-202	Vis	P08
Gm41335	3.72796e-205	0.288629	0.24	0.041	1.34538e-200	Vis	P08
Scn3a	3.09658e-204	0.37117	0.9	0.612	1.11753e-199	Vis	P08
Chd5	5.18037e-202	0.252459	0.925	0.653	1.86954e-197	Vis	P08
Tpr	1.05941e-199	0.260481	0.844	0.548	3.82331e-195	Vis	P08
Chd3	1.43412e-199	0.304717	0.913	0.635	5.1756e-195	Vis	P08
Bzw2	1.48882e-199	0.268207	0.819	0.519	5.37298e-195	Vis	P08
4930509J09Rik	2.38933e-199	0.416979	0.704	0.381	8.62284e-195	Vis	P08
Zeb1	1.36139e-198	0.441624	0.911	0.641	4.91311e-194	Vis	P08
Gm26905	3.63416e-198	0.543213	0.812	0.515	1.31153e-193	Vis	P08
Kansl1l	1.32072e-197	0.264335	0.727	0.423	4.76635e-193	Vis	P08
Rnf121	2.16918e-197	0.413049	0.821	0.511	7.82836e-193	Vis	P08
Zranb2	3.05602e-196	0.338793	0.99	0.828	1.10289e-191	Vis	P08
Psip1	3.85273e-196	0.277246	0.904	0.626	1.39041e-191	Vis	P08
Pou6f2	3.13451e-195	0.457159	0.277	0.06	1.13121e-190	Vis	P08
Srrm1	1.16763e-194	0.261714	0.895	0.617	4.21387e-190	Vis	P08
Snrnp70	1.44641e-194	0.390089	0.978	0.818	5.21994e-190	Vis	P08
Rfx3	4.62806e-194	0.462532	0.937	0.712	1.67022e-189	Vis	P08
Cdk8	6.51476e-194	0.252945	0.909	0.641	2.35111e-189	Vis	P08
Arap2	1.41686e-193	0.504747	0.914	0.671	5.11331e-189	Vis	P08
Ftx	4.09459e-193	0.252415	0.859	0.573	1.4777e-188	Vis	P08
Plekha1	1.15403e-191	0.283386	0.86	0.571	4.16479e-187	Vis	P08
Zfp280d	1.63377e-191	0.284713	0.89	0.61	5.89611e-187	Vis	P08
Pnn	3.89895e-191	0.292987	0.912	0.642	1.40709e-186	Vis	P08
Cdh4	7.15943e-191	0.327423	0.751	0.438	2.58377e-186	Vis	P08
Mef2a	1.23655e-190	0.341027	0.901	0.624	4.46258e-186	Vis	P08
Calm2	1.67296e-190	0.345705	0.953	0.715	6.03754e-186	Vis	P08
Npr3	6.63102e-190	0.392793	0.837	0.538	2.39307e-185	Vis	P08
Ptprz1	2.60459e-187	0.269023	0.602	0.312	9.39972e-183	Vis	P08
Cep170	2.72149e-187	0.27037	0.88	0.602	9.82158e-183	Vis	P08
Dnm3	1.60147e-185	0.42685	0.964	0.791	5.77956e-181	Vis	P08
Rgl1	7.18581e-184	0.268396	0.835	0.55	2.59329e-179	Vis	P08
Glra2	1.25498e-183	0.286869	0.643	0.352	4.52909e-179	Vis	P08
Rsrp1	1.76782e-183	0.365843	0.967	0.765	6.37989e-179	Vis	P08
Rbms3	6.93099e-183	0.4934	0.693	0.383	2.50133e-178	Vis	P08
Csgalnact1	1.95769e-181	0.407777	0.879	0.609	7.06511e-177	Vis	P08
Sash1	3.90886e-181	0.337257	0.421	0.158	1.41067e-176	Vis	P08
Slc6a15	6.97443e-180	0.336176	0.86	0.578	2.517e-175	Vis	P08
Pum1	1.49453e-179	0.283271	0.896	0.628	5.39362e-175	Vis	P08
Adcy8	3.26891e-178	0.268231	0.877	0.606	1.17972e-173	Vis	P08
Rin2	1.79507e-177	0.33512	0.275	0.066	6.47823e-173	Vis	P08
Lhfpl3	2.22709e-177	0.445137	0.759	0.457	8.03735e-173	Vis	P08
Rims2	3.47169e-176	0.374163	0.994	0.951	1.2529e-171	Vis	P08
Xpr1	1.334e-173	0.280816	0.884	0.618	4.81426e-169	Vis	P08
Sntb2	6.22181e-172	0.264738	0.657	0.372	2.24539e-167	Vis	P08
Rgma	6.49215e-172	0.265101	0.854	0.58	2.34295e-167	Vis	P08
Rarb	1.83214e-171	0.529748	0.485	0.207	6.61199e-167	Vis	P08
Stxbp6	2.43801e-171	0.310555	0.558	0.286	8.79853e-167	Vis	P08
Sdccag8	3.3888e-170	0.251156	0.835	0.561	1.22298e-165	Vis	P08
Tcf4	3.19209e-169	0.33782	0.998	0.972	1.15199e-164	Vis	P08
Arfgef3	2.16655e-168	0.281562	0.888	0.627	7.81887e-164	Vis	P08
Vps13a	2.54315e-168	0.253758	0.885	0.628	9.17798e-164	Vis	P08
Robo2	2.10058e-165	0.390021	0.995	0.978	7.58078e-161	Vis	P08
Adamts17	2.15979e-165	0.277077	0.447	0.197	7.79448e-161	Vis	P08
Zmynd11	5.67807e-165	0.294693	0.945	0.721	2.04916e-160	Vis	P08
Arhgap24	6.77282e-165	0.321438	0.277	0.072	2.44424e-160	Vis	P08
Rbm26	1.73143e-162	0.283895	0.947	0.726	6.24855e-158	Vis	P08
Syn3	5.20063e-162	0.398229	0.968	0.808	1.87685e-157	Vis	P08
C1ql3	5.72778e-161	0.357521	0.542	0.265	2.0671e-156	Vis	P08
Ncor1	9.60887e-161	0.297503	0.951	0.738	3.46774e-156	Vis	P08
Atrx	1.45851e-160	0.299954	0.972	0.783	5.26361e-156	Vis	P08
Zfpm2	8.59924e-158	0.654258	0.789	0.529	3.10338e-153	Vis	P08
Vwc2l	3.14883e-157	0.727408	0.595	0.325	1.13638e-152	Vis	P08
Ewsr1	3.39793e-157	0.271209	0.891	0.641	1.22628e-152	Vis	P08
Ildr2	3.05415e-156	0.275877	0.877	0.623	1.10221e-151	Vis	P08
Cacnb2	8.46981e-156	0.332248	0.79	0.517	3.05667e-151	Vis	P08
Ktn1	5.26649e-154	0.335857	0.97	0.8	1.90062e-149	Vis	P08
Slc24a2	1.20508e-151	0.311048	0.894	0.651	4.34901e-147	Vis	P08
Ust	9.8325e-151	0.563361	0.866	0.632	3.54845e-146	Vis	P08
Kifap3	9.12183e-148	0.260442	0.959	0.763	3.29198e-143	Vis	P08
Lgi1	2.362e-146	0.354825	0.84	0.584	8.52423e-142	Vis	P08
Pkp4	9.82109e-146	0.386548	0.925	0.715	3.54433e-141	Vis	P08
Esyt2	1.44869e-145	0.32403	0.923	0.706	5.22817e-141	Vis	P08
Dgkg	4.368e-145	0.259106	0.473	0.233	1.57637e-140	Vis	P08
Met	7.25136e-144	0.30596	0.727	0.462	2.61694e-139	Vis	P08
Adgrl3	1.46813e-143	0.284401	0.998	0.989	5.29833e-139	Vis	P08
Ltbp1	2.89866e-143	0.404244	0.351	0.131	1.0461e-138	Vis	P08
Nwd2	1.48815e-142	0.593086	0.925	0.76	5.37058e-138	Vis	P08
Cspp1	1.23508e-141	0.300834	0.966	0.794	4.45729e-137	Vis	P08
Wdpcp	6.0996e-140	0.510681	0.673	0.404	2.20129e-135	Vis	P08
Arhgef7	1.24793e-139	0.266804	0.893	0.661	4.50364e-135	Vis	P08
Pdzd2	2.36287e-133	0.341076	0.989	0.951	8.52734e-129	Vis	P08
Galntl6	1.57472e-131	0.426165	0.998	0.993	5.68302e-127	Vis	P08
Atp2c1	2.70423e-131	0.341465	0.96	0.815	9.75929e-127	Vis	P08
Ntrk2	1.79354e-130	0.288755	0.997	0.981	6.47272e-126	Vis	P08
Unc5c	2.89062e-129	0.451041	0.987	0.925	1.0432e-124	Vis	P08
Bicc1	6.92376e-126	0.448883	0.417	0.188	2.49872e-121	Vis	P08
Gls	3.23886e-124	0.285163	0.986	0.887	1.16887e-119	Vis	P08
Gm20754	3.9959e-123	0.412916	0.991	0.958	1.44208e-118	Vis	P08
Rora	2.79157e-120	1.18527	0.904	0.785	1.00745e-115	Vis	P08
Dock4	1.51426e-118	0.310928	0.917	0.724	5.46482e-114	Vis	P08
Srgap1	3.18256e-115	0.261967	0.947	0.776	1.14856e-110	Vis	P08
Gm26848	1.4334e-114	0.285576	0.92	0.728	5.17298e-110	Vis	P08
Jakmip1	5.24125e-113	0.261207	0.977	0.857	1.89152e-108	Vis	P08
AC121788.1	2.83563e-110	0.74668	0.352	0.151	1.02335e-105	Vis	P08
Gm20642	1.86968e-106	0.256331	0.864	0.657	6.74747e-102	Vis	P08
Grin3a	4.72306e-104	0.510314	0.713	0.482	1.7045e-99	Vis	P08
Dapk1	2.65306e-103	0.31379	0.964	0.839	9.57462e-99	Vis	P08
Piezo2	1.33377e-102	0.26163	0.138	0.028	4.81344e-98	Vis	P08
Plppr1	2.29796e-101	0.282712	0.961	0.831	8.2931e-97	Vis	P08
Nrg1	5.29348e-99	0.409372	1	0.995	1.91036e-94	Vis	P08
Pak7	1.08307e-95	0.280941	0.97	0.863	3.9087e-91	Vis	P08
Clstn2	2.862e-82	0.282159	0.992	0.962	1.03287e-77	Vis	P08
Dpp6	3.77339e-79	0.279652	0.988	0.965	1.36178e-74	Vis	P08
Hs3st5	7.44225e-75	0.378194	0.904	0.761	2.68583e-70	Vis	P08
2001-03-01	7.6511e-74	0.283626	0.986	0.939	2.76121e-69	Vis	P08
Ctnna3	5.21586e-38	0.3215	0.742	0.623	1.88235e-33	Vis	P08
Lrrtm3	1.71628e-30	0.321654	0.844	0.776	6.19388e-26	Vis	P08
Sgcd	1.60556e-19	0.368554	0.79	0.71	5.79431e-15	Vis	P08
Kirrel3	6.38018e-06	0.319898	0.984	0.972	0.230254	Vis	P08
St6galnac5	0	1.37622	0.749	0.398	0	MO	P21
Gpc5	0	1.1486	0.795	0.447	0	MO	P21
Astn2	0	1.05609	0.954	0.859	0	MO	P21
Mgat4c	0	1.03792	0.829	0.484	0	MO	P21
Pcdh15	0	0.900941	0.777	0.407	0	MO	P21
Crim1	0	0.803629	0.656	0.299	0	MO	P21
Fras1	0	0.796253	0.834	0.532	0	MO	P21
Cdh11	0	0.713712	0.863	0.592	0	MO	P21
Opcml	0	0.707677	1	1	0	MO	P21
Grid2	0	0.668139	0.998	0.978	0	MO	P21
Kcnip4	0	0.574146	1	0.998	0	MO	P21
Cadm2	0	0.558358	1	0.999	0	MO	P21
Fstl5	2.58287e-307	0.81105	0.79	0.483	9.32133e-303	MO	P21
Pde1a	2.35482e-300	0.584235	0.985	0.802	8.49831e-296	MO	P21
Nkain3	1.08242e-291	0.806809	0.642	0.324	3.90636e-287	MO	P21
Nkain2	1.78936e-287	0.382007	1	0.999	6.4576e-283	MO	P21
Adamts18	3.60398e-280	0.628149	0.425	0.118	1.30064e-275	MO	P21
Ephb1	3.3591e-274	0.674504	0.843	0.617	1.21226e-269	MO	P21
St6galnac3	1.91653e-272	0.953826	0.897	0.731	6.91656e-268	MO	P21
L3mbtl4	1.04449e-263	0.810132	0.626	0.32	3.76945e-259	MO	P21
Ryr3	7.9274e-248	0.547166	0.973	0.861	2.86092e-243	MO	P21
Gpc6	7.48729e-241	0.7622	0.844	0.603	2.70209e-236	MO	P21
Ldb2	7.8418e-237	0.5405	0.963	0.835	2.83003e-232	MO	P21
Cacnb4	1.12317e-235	0.479951	0.994	0.976	4.05341e-231	MO	P21
Lsamp	7.358e-232	1.41259	0.964	0.888	2.65543e-227	MO	P21
Atrnl1	9.26696e-231	0.497961	0.978	0.935	3.34435e-226	MO	P21
Cttnbp2	7.10148e-217	0.400928	0.991	0.98	2.56285e-212	MO	P21
Pitpnc1	1.69702e-213	0.656754	0.59	0.309	6.12437e-209	MO	P21
Dmd	1.53545e-209	0.455602	0.987	0.903	5.54127e-205	MO	P21
Enox1	1.12796e-204	0.555741	0.941	0.838	4.07069e-200	MO	P21
Tenm2	2.82711e-204	0.35643	0.998	0.96	1.02027e-199	MO	P21
Hdac9	1.30128e-200	0.450006	0.986	0.927	4.69619e-196	MO	P21
Man2a1	4.24682e-200	0.578988	0.752	0.533	1.53263e-195	MO	P21
Ndst3	7.88921e-197	0.545459	0.908	0.727	2.84714e-192	MO	P21
Rph3a	2.0968e-191	0.575143	0.543	0.266	7.56715e-187	MO	P21
Ptprt	5.01241e-188	0.590849	0.713	0.451	1.80893e-183	MO	P21
Aff3	1.32792e-185	0.470438	0.96	0.887	4.79233e-181	MO	P21
Gm28928	4.6305e-182	0.296257	1	0.999	1.6711e-177	MO	P21
Asic2	6.6038e-179	0.3209	0.999	0.995	2.38324e-174	MO	P21
Sema6d	1.46728e-173	0.507848	0.95	0.823	5.29525e-169	MO	P21
Diaph3	2.44029e-169	0.389752	0.242	0.054	8.80675e-165	MO	P21
Ano3	8.69703e-164	0.573502	0.791	0.564	3.13867e-159	MO	P21
Ncam2	1.21971e-163	0.39142	0.996	0.973	4.40181e-159	MO	P21
Grik4	3.85142e-161	0.563908	0.568	0.32	1.38994e-156	MO	P21
Grm8	1.20626e-160	0.48256	0.966	0.893	4.35328e-156	MO	P21
Sgcz	1.62045e-160	0.315919	1	0.997	5.84806e-156	MO	P21
Tnr	4.14377e-160	0.48668	0.918	0.849	1.49544e-155	MO	P21
Zdhhc14	4.98833e-155	0.500038	0.692	0.453	1.80024e-150	MO	P21
Epha6	4.21477e-153	0.388777	0.973	0.871	1.52107e-148	MO	P21
Kcnd2	1.10589e-152	0.365467	0.996	0.988	3.99106e-148	MO	P21
Nlk	6.86159e-151	0.393705	0.962	0.905	2.47628e-146	MO	P21
Grid1	4.03654e-149	0.433381	0.951	0.872	1.45675e-144	MO	P21
Gabrb2	6.91296e-148	0.440649	0.924	0.804	2.49482e-143	MO	P21
Hs3st4	1.75558e-147	0.53037	0.404	0.182	6.33572e-143	MO	P21
Pigk	2.50653e-147	0.600096	0.672	0.473	9.0458e-143	MO	P21
Nedd4l	3.01421e-138	0.381111	0.948	0.879	1.0878e-133	MO	P21
Gria3	1.8644e-137	0.275401	0.995	0.964	6.72843e-133	MO	P21
Nckap5	5.04003e-133	0.451361	0.438	0.216	1.8189e-128	MO	P21
Pde4b	4.94586e-132	0.391119	0.939	0.822	1.78491e-127	MO	P21
Tox	2.91026e-131	0.312686	0.983	0.895	1.05028e-126	MO	P21
Meis2	3.95028e-130	0.455228	0.857	0.695	1.42562e-125	MO	P21
Spag5	5.29775e-127	0.691586	0.331	0.154	1.9119e-122	MO	P21
Spock1	2.69668e-126	0.33829	0.943	0.832	9.73206e-122	MO	P21
6430573F11Rik	2.92147e-126	0.458925	0.58	0.373	1.05433e-121	MO	P21
Gm2163	3.975e-125	0.7787	0.371	0.19	1.43454e-120	MO	P21
Khdrbs3	1.45359e-124	0.302592	0.991	0.959	5.24588e-120	MO	P21
Snap25	1.29775e-123	0.274382	0.992	0.984	4.68344e-119	MO	P21
Zfp608	2.3921e-121	0.405045	0.455	0.249	8.63284e-117	MO	P21
Foxp2	3.71351e-121	0.467961	0.445	0.24	1.34017e-116	MO	P21
Slc1a2	7.96177e-120	0.457394	0.672	0.464	2.87332e-115	MO	P21
Pappa2	4.21171e-112	0.252364	0.134	0.02	1.51996e-107	MO	P21
Nrcam	7.9913e-112	0.263406	0.994	0.972	2.88398e-107	MO	P21
Dkk3	1.46472e-110	0.279085	0.178	0.044	5.28601e-106	MO	P21
Bach2	4.53926e-110	0.388158	0.818	0.651	1.63817e-105	MO	P21
Runx2	3.99725e-109	0.410684	0.614	0.418	1.44257e-104	MO	P21
Mdga2	7.76768e-109	0.261444	0.996	0.991	2.80328e-104	MO	P21
Mir99ahg	8.17421e-107	0.571636	0.294	0.134	2.94999e-102	MO	P21
Gm26871	7.13697e-105	0.828371	0.403	0.216	2.57566e-100	MO	P21
Lingo2	1.09443e-104	0.297577	0.998	0.997	3.94967e-100	MO	P21
Parp8	1.7956e-104	0.388178	0.684	0.49	6.48014e-100	MO	P21
Pcdh17	6.37546e-102	0.410639	0.475	0.292	2.30084e-97	MO	P21
Ptprr	2.08729e-101	0.401538	0.687	0.507	7.53281e-97	MO	P21
Cep112	4.06591e-101	0.401857	0.327	0.157	1.46735e-96	MO	P21
Thrb	6.48167e-101	0.303963	0.987	0.959	2.33917e-96	MO	P21
Adra1a	4.35387e-95	0.329628	0.504	0.302	1.57127e-90	MO	P21
Gm17167	1.62096e-94	0.729843	0.397	0.217	5.84989e-90	MO	P21
Mbp	4.10391e-94	0.371884	0.534	0.338	1.48106e-89	MO	P21
Dlg2.1	2.28028e-93	0.864323	0.413	0.228	8.2293e-89	MO	P21
Fah	1.22504e-92	0.314016	0.185	0.067	4.42105e-88	MO	P21
Socs2	2.9895e-92	0.290423	0.307	0.14	1.07888e-87	MO	P21
Cntn5	9.36856e-92	0.364911	0.773	0.585	3.38102e-87	MO	P21
Lypd1	1.00657e-90	0.260859	0.217	0.077	3.6326e-86	MO	P21
9330162G02Rik	7.22459e-90	0.640757	0.411	0.227	2.60728e-85	MO	P21
Kcnq3	1.43061e-88	0.293535	0.98	0.956	5.16292e-84	MO	P21
Rian	2.32913e-88	0.630207	0.41	0.225	8.40559e-84	MO	P21
Trim30a	3.20979e-88	0.345458	0.211	0.092	1.15838e-83	MO	P21
Snhg14	9.63811e-88	0.654823	0.41	0.226	3.4783e-83	MO	P21
Lhfp	5.93281e-87	0.400054	0.449	0.271	2.14109e-82	MO	P21
Tmeff1	1.44687e-86	0.394274	0.573	0.403	5.2216e-82	MO	P21
Rab3c	3.87522e-86	0.327218	0.896	0.8	1.39853e-81	MO	P21
Prkcg	2.26991e-85	0.325128	0.856	0.723	8.19189e-81	MO	P21
Epha7	1.1551e-84	0.373375	0.785	0.646	4.16865e-80	MO	P21
Gm12394	2.75177e-84	0.601559	0.37	0.205	9.93087e-80	MO	P21
Pcdh11x	5.75978e-84	0.408678	0.506	0.323	2.07865e-79	MO	P21
Sema3c	2.45904e-83	0.274313	0.215	0.085	8.87441e-79	MO	P21
Prickle2	2.65127e-82	0.260717	0.981	0.946	9.56819e-78	MO	P21
Il1rap	1.18394e-81	0.327154	0.588	0.401	4.27272e-77	MO	P21
Alk	2.47772e-81	0.399534	0.392	0.23	8.94185e-77	MO	P21
Ptprg	1.82943e-80	0.314015	0.933	0.851	6.60224e-76	MO	P21
Wwc1	1.66573e-79	0.38764	0.739	0.588	6.01144e-75	MO	P21
Pde4a	1.25304e-76	0.321562	0.874	0.771	4.52211e-72	MO	P21
Caln1	1.75403e-76	0.300877	0.849	0.703	6.33012e-72	MO	P21
A330008L17Rik	2.29175e-76	0.502923	0.554	0.387	8.27068e-72	MO	P21
Gm38073	1.19922e-75	0.512942	0.368	0.202	4.32787e-71	MO	P21
Cdh8	1.52853e-75	0.341665	0.914	0.798	5.51632e-71	MO	P21
Zcchc16	9.87099e-75	0.444955	0.21	0.086	3.56234e-70	MO	P21
Osbpl3	6.70112e-74	0.334978	0.748	0.632	2.41837e-69	MO	P21
Cdh13	1.27941e-73	0.419565	0.829	0.701	4.61725e-69	MO	P21
Gm27247	1.25241e-72	0.474994	0.353	0.193	4.51984e-68	MO	P21
Stxbp5l	2.5024e-71	0.276974	0.965	0.92	9.03091e-67	MO	P21
Gm28153	4.4117e-71	0.353189	0.207	0.089	1.59214e-66	MO	P21
Focad	4.49703e-70	0.255037	0.939	0.893	1.62293e-65	MO	P21
Gm44560	9.097e-68	0.422929	0.362	0.206	3.28302e-63	MO	P21
Sorbs2	1.4637e-66	0.261558	0.904	0.835	5.28233e-62	MO	P21
Col25a1	4.21111e-66	0.26665	0.269	0.133	1.51975e-61	MO	P21
Ccdc85a	4.45039e-66	0.30987	0.852	0.774	1.6061e-61	MO	P21
Clmp	6.33129e-66	0.317957	0.305	0.168	2.2849e-61	MO	P21
Mllt3	8.93651e-66	0.270424	0.9	0.822	3.2251e-61	MO	P21
Sulf2	2.41116e-65	0.308526	0.645	0.487	8.70163e-61	MO	P21
Gm30382	3.21208e-65	0.315247	0.838	0.709	1.15921e-60	MO	P21
2610203C20Rik	4.11742e-65	0.406704	0.281	0.145	1.48593e-60	MO	P21
Homer1	1.25495e-63	0.334722	0.878	0.805	4.529e-59	MO	P21
Neto1	2.60287e-63	0.292072	0.895	0.828	9.39351e-59	MO	P21
Nol4	1.55727e-61	0.270302	0.87	0.787	5.62003e-57	MO	P21
Zswim6	1.0224e-60	0.41032	0.309	0.17	3.68974e-56	MO	P21
Ntng1	3.02594e-60	0.259125	0.932	0.86	1.09203e-55	MO	P21
Gm4258	3.54906e-59	0.390979	0.288	0.157	1.28082e-54	MO	P21
Spon1	1.57673e-58	0.299254	0.489	0.334	5.69025e-54	MO	P21
Plxna4	1.50772e-56	0.316848	0.883	0.816	5.4412e-52	MO	P21
Grm3	2.29349e-56	0.279947	0.754	0.618	8.27699e-52	MO	P21
RP24-349L11.1	2.13245e-55	0.301684	0.194	0.09	7.6958e-51	MO	P21
Kctd1	3.65054e-54	0.294011	0.538	0.404	1.31744e-49	MO	P21
Fam65b	4.91675e-54	0.268773	0.159	0.065	1.77441e-49	MO	P21
Whsc1l1	5.68344e-54	0.333617	0.308	0.176	2.0511e-49	MO	P21
Mpped2	5.72409e-54	0.312884	0.699	0.557	2.06577e-49	MO	P21
A330023F24Rik	1.60399e-53	0.368362	0.304	0.173	5.78864e-49	MO	P21
Ptpre	1.02184e-52	0.261245	0.662	0.518	3.68772e-48	MO	P21
Gm26804	1.2492e-52	0.314812	0.271	0.164	4.50824e-48	MO	P21
Diaph2	2.91747e-52	0.272231	0.918	0.846	1.05289e-47	MO	P21
3110035E14Rik	1.3588e-51	0.258291	0.491	0.354	4.90379e-47	MO	P21
Cntn1	1.79362e-51	0.251988	0.964	0.927	6.47299e-47	MO	P21
Mctp1	1.57635e-50	0.26267	0.778	0.65	5.68889e-46	MO	P21
Shc3	9.47939e-50	0.269011	0.653	0.525	3.42102e-45	MO	P21
A230103L15Rik	9.53981e-50	0.332821	0.286	0.163	3.44282e-45	MO	P21
Gm20417	1.01554e-49	0.268517	0.185	0.086	3.66497e-45	MO	P21
A330076H08Rik	1.50892e-49	0.32148	0.269	0.149	5.44553e-45	MO	P21
Apba1	1.72712e-49	0.309413	0.877	0.802	6.23302e-45	MO	P21
C77370	8.99935e-49	0.251387	0.161	0.071	3.24778e-44	MO	P21
Adgra1	1.98799e-47	0.259305	0.691	0.565	7.17446e-43	MO	P21
Sorcs3	3.58058e-46	0.277034	0.301	0.181	1.29219e-41	MO	P21
Cacnb2	3.80628e-46	0.25076	0.545	0.404	1.37365e-41	MO	P21
Plxdc2	1.0739e-44	0.28441	0.464	0.332	3.87558e-40	MO	P21
Gm15800	4.66663e-44	0.305319	0.291	0.173	1.68414e-39	MO	P21
4930578G10Rik	6.39768e-44	0.260583	0.198	0.102	2.30886e-39	MO	P21
Cntnap5b	1.39359e-43	0.321841	0.742	0.629	5.02934e-39	MO	P21
Rfwd2	1.01148e-41	0.257083	0.197	0.105	3.65034e-37	MO	P21
Prr16	4.11645e-40	0.288134	0.795	0.695	1.48559e-35	MO	P21
Ccdc64	7.79566e-38	0.258368	0.226	0.129	2.81337e-33	MO	P21
Gm10649	6.09308e-37	0.257261	0.203	0.11	2.19893e-32	MO	P21
Hs6st3	8.94110599278904e-319	0.781174	0.997	0.979	3.22675574173764e-314	S1	P21
Cntnap5a	2.28159e-212	0.617937	0.987	0.961	8.23401e-208	S1	P21
Brinp3	5.62351e-169	0.815704	0.765	0.592	2.02947e-164	S1	P21
Slc24a2	4.02334e-134	0.542843	0.956	0.894	1.45198e-129	S1	P21
Ltbp1	1.68608e-131	0.694194	0.372	0.158	6.08488e-127	S1	P21
A330102I10Rik	2.17733e-127	0.529212	0.739	0.598	7.85777e-123	S1	P21
Gm13629	1.03979e-125	0.628647	0.573	0.378	3.7525e-121	S1	P21
Sox5	2.83772e-110	0.358199	0.996	0.988	1.02411e-105	S1	P21
Pde8b	1.01672e-108	0.567236	0.627	0.501	3.66923e-104	S1	P21
Camta1	8.44773e-108	0.397039	0.996	0.992	3.0487e-103	S1	P21
Esrrg	3.75035e-94	0.459507	0.932	0.922	1.35346e-89	S1	P21
Syt2	1.13912e-88	0.491319	0.337	0.19	4.11097e-84	S1	P21
Rorb	4.02291e-83	0.530776	0.397	0.243	1.45183e-78	S1	P21
Frmd5	6.74099e-82	0.332869	0.989	0.983	2.43276e-77	S1	P21
Nell1	4.40519e-79	0.517081	0.888	0.823	1.58979e-74	S1	P21
Unc5c	5.47848e-79	0.390492	0.963	0.955	1.97713e-74	S1	P21
Brinp2	2.25274e-77	0.344108	0.583	0.556	8.1299e-73	S1	P21
Bmpr1b	4.38503e-76	0.432955	0.27	0.135	1.58251e-71	S1	P21
AY036118	7.92896e-73	0.254516	0.496	0.531	2.86148e-68	S1	P21
Trpm3	8.24498e-73	0.490151	0.522	0.447	2.97553e-68	S1	P21
4930419G24Rik	2.44458e-70	0.391553	0.785	0.768	8.82226e-66	S1	P21
Pcdh9	1.28504e-69	0.338736	0.996	0.987	4.63757e-65	S1	P21
Sgpp2	2.22761e-69	0.368699	0.554	0.483	8.03921e-65	S1	P21
Bcl11a	5.49492e-69	0.38703	0.819	0.745	1.98306e-64	S1	P21
Wscd2	2.09779e-67	0.358834	0.473	0.399	7.57071e-63	S1	P21
Fat3	5.43372e-67	0.282371	0.991	0.985	1.96097e-62	S1	P21
Scn9a	5.77598e-66	0.347427	0.273	0.155	2.08449e-61	S1	P21
Ptprk	2.00073e-63	0.582278	0.486	0.438	7.22044e-59	S1	P21
Kansl1l	3.00482e-63	0.266758	0.496	0.479	1.08441e-58	S1	P21
Rora	6.66379e-62	0.659577	0.955	0.953	2.4049e-57	S1	P21
Sv2c	1.04938e-59	0.411928	0.444	0.326	3.78712e-55	S1	P21
Sox5os4	1.18692e-59	0.355409	0.464	0.38	4.28348e-55	S1	P21
Fstl4	6.7764e-59	0.446544	0.624	0.556	2.44553e-54	S1	P21
Nrsn1	2.69595e-57	0.297581	0.349	0.291	9.72941e-53	S1	P21
Etv1	3.97093e-55	0.344588	0.565	0.539	1.43307e-50	S1	P21
Col6a1	4.8548e-55	0.313879	0.158	0.062	1.75205e-50	S1	P21
Lrtm1	5.88303e-55	0.290693	0.46	0.406	2.12313e-50	S1	P21
Scn1a	1.0404e-54	0.264258	0.959	0.958	3.75469e-50	S1	P21
Pak7	1.09865e-54	0.338827	0.768	0.753	3.96493e-50	S1	P21
Htr2c	1.46247e-54	0.442422	0.43	0.308	5.2779e-50	S1	P21
Col26a1	2.6355e-53	0.395871	0.161	0.062	9.51126e-49	S1	P21
Rcan2	4.05404e-53	0.331881	0.438	0.359	1.46306e-48	S1	P21
Gm37459	1.66321e-52	0.268664	0.512	0.482	6.00237e-48	S1	P21
Sfxn5	2.63302e-52	0.277954	0.674	0.653	9.5023e-48	S1	P21
Hs3st5	4.24502e-52	0.345786	0.587	0.548	1.53199e-47	S1	P21
Ppm1l	6.23689e-52	0.262062	0.902	0.92	2.25083e-47	S1	P21
Plxdc1	8.83329e-52	0.303629	0.33	0.263	3.18785e-47	S1	P21
Arid1b	1.17706e-51	0.285775	0.907	0.89	4.2479e-47	S1	P21
Olfm3	2.04979e-51	0.351979	0.317	0.21	7.3975e-47	S1	P21
Cdh20	1.46505e-50	0.364469	0.706	0.647	5.28721e-46	S1	P21
Rgs6	4.04676e-50	0.379665	0.852	0.802	1.46043e-45	S1	P21
Atp1a3	9.59927e-50	0.255117	0.923	0.92	3.46428e-45	S1	P21
9630028H03Rik	1.74608e-49	0.269888	0.54	0.526	6.30144e-45	S1	P21
Cdh18	4.08937e-49	0.326574	0.719	0.695	1.47581e-44	S1	P21
Tgfbr1	1.74216e-48	0.296987	0.274	0.213	6.28728e-44	S1	P21
Zmat4	3.2337e-48	0.261888	0.7	0.699	1.16701e-43	S1	P21
5730522E02Rik	5.31345e-48	0.300574	0.875	0.855	1.91757e-43	S1	P21
Cntn6	6.41551e-48	0.340842	0.737	0.721	2.3153e-43	S1	P21
Ptchd4	8.28444e-48	0.302363	0.43	0.38	2.98977e-43	S1	P21
Vrk2	1.31573e-47	0.299672	0.266	0.199	4.74833e-43	S1	P21
Rbms1	1.17402e-46	0.265113	0.881	0.864	4.23692e-42	S1	P21
Cadps2	1.96321e-46	0.369322	0.681	0.719	7.08503e-42	S1	P21
Efna5	2.30121e-44	0.319116	0.952	0.934	8.30484e-40	S1	P21
Specc1	3.72021e-43	0.29685	0.854	0.832	1.34259e-38	S1	P21
Grin1	1.8954e-42	0.25171	0.959	0.952	6.84032e-38	S1	P21
Tmem108	8.21514e-42	0.354344	0.886	0.855	2.96476e-37	S1	P21
Vwc2l	1.11837e-41	0.559668	0.228	0.124	4.03608e-37	S1	P21
Gm26883	7.68036e-41	0.30582	0.106	0.042	2.77177e-36	S1	P21
Rbfox3	5.56655e-40	0.308071	0.956	0.947	2.00891e-35	S1	P21
Tshz2	1.44277e-39	0.512965	0.158	0.086	5.20681e-35	S1	P21
Plcb4	1.67675e-39	0.267944	0.688	0.681	6.05123e-35	S1	P21
Lrrtm4	6.02252e-36	0.274242	0.995	0.998	2.17347e-31	S1	P21
Kctd16	9.63608e-36	0.278258	0.772	0.809	3.47757e-31	S1	P21
Eda	1.17801e-35	0.262158	0.474	0.445	4.25131e-31	S1	P21
Spock3	1.34669e-31	0.33361	0.368	0.282	4.86008e-27	S1	P21
Ust	1.4375e-31	0.280331	0.522	0.458	5.18779e-27	S1	P21
Trerf1	1.29562e-23	0.388816	0.336	0.275	4.67576e-19	S1	P21
Cntnap5a	2.54782e-271	0.7345	0.993	0.96	9.19483e-267	S2	P21
Fam19a2	4.24847e-220	0.861085	0.844	0.711	1.53323e-215	S2	P21
Negr1	1.04545e-212	0.665081	0.991	0.975	3.77292e-208	S2	P21
Tcerg1l	9.53123e-168	0.63584	0.72	0.604	3.43973e-163	S2	P21
Pdzrn3	1.32179e-126	0.618243	0.929	0.794	4.77019e-122	S2	P21
Stxbp6	6.90711e-122	0.777933	0.601	0.347	2.49271e-117	S2	P21
Mia2	1.60529e-113	0.436147	0.458	0.397	5.79331e-109	S2	P21
Zranb2	2.30155e-112	0.5449	0.937	0.86	8.30606e-108	S2	P21
Gm36251	1.63884e-106	0.464536	0.258	0.146	5.91441e-102	S2	P21
Malat1	2.65234e-97	0.529127	1	1	9.57204e-93	S2	P21
Slc35f1	2.75237e-87	0.54587	0.733	0.681	9.93303e-83	S2	P21
Pcsk5	1.12937e-84	0.419493	0.907	0.917	4.07578e-80	S2	P21
Tcf25	8.80066e-82	0.542978	0.738	0.622	3.17607e-77	S2	P21
Abi3bp	1.08636e-81	0.468653	0.209	0.081	3.92057e-77	S2	P21
Pdgfc	1.11651e-73	0.387403	0.438	0.353	4.02939e-69	S2	P21
Pnn	4.53647e-72	0.36091	0.693	0.668	1.63717e-67	S2	P21
Cntnap5c	1.49446e-71	0.586418	0.592	0.499	5.39335e-67	S2	P21
Kirrel3	5.23551e-70	0.466318	0.973	0.965	1.88944e-65	S2	P21
Dcaf7	1.34299e-68	0.263436	0.452	0.444	4.84672e-64	S2	P21
Gda	2.70555e-68	0.320003	0.719	0.726	9.76405e-64	S2	P21
Mir124a-1hg	3.20882e-67	0.35882	0.759	0.733	1.15803e-62	S2	P21
Ptprk	1.46565e-65	0.497675	0.413	0.456	5.28939e-61	S2	P21
Rnpc3	1.18306e-64	0.292898	0.541	0.535	4.26954e-60	S2	P21
Rbfox1	1.21447e-64	0.250957	1	1	4.38289e-60	S2	P21
A630089N07Rik	4.26926e-64	0.274468	0.265	0.231	1.54073e-59	S2	P21
Nrsn1	1.00018e-63	0.357809	0.372	0.288	3.60957e-59	S2	P21
Cdc37l1	1.15353e-62	0.290367	0.611	0.593	4.16297e-58	S2	P21
Arhgap15	3.79314e-61	0.428132	0.524	0.431	1.36891e-56	S2	P21
Babam2	9.39315e-60	0.260609	0.406	0.395	3.38989e-55	S2	P21
Slit2	1.31976e-59	0.348839	0.874	0.887	4.76289e-55	S2	P21
Htr1f	1.86125e-59	0.346422	0.935	0.932	6.71705e-55	S2	P21
Kctd16	4.41348e-59	0.474996	0.834	0.793	1.59278e-54	S2	P21
2900055J20Rik	1.88297e-58	0.255967	0.259	0.232	6.79546e-54	S2	P21
BC005561	1.15677e-57	0.329956	0.762	0.726	4.17465e-53	S2	P21
Rsrp1	3.92348e-56	0.336845	0.842	0.809	1.41594e-51	S2	P21
Bcl6	5.16826e-56	0.272559	0.419	0.39	1.86517e-51	S2	P21
Luzp2	2.76277e-55	0.47969	0.678	0.639	9.97056e-51	S2	P21
Dpy19l1	6.5457e-54	0.267953	0.427	0.4	2.36228e-49	S2	P21
Arid1b	3.00777e-52	0.279478	0.883	0.897	1.08547e-47	S2	P21
Dpyd	4.82588e-52	0.334948	0.453	0.433	1.74161e-47	S2	P21
Pid1	1.10455e-51	0.274136	0.67	0.713	3.98619e-47	S2	P21
Usp3	1.41603e-50	0.259483	0.639	0.638	5.1103e-46	S2	P21
Pcgf5	4.95504e-48	0.295532	0.645	0.625	1.78822e-43	S2	P21
Alcam	7.16128e-48	0.321539	0.486	0.469	2.58443e-43	S2	P21
Pdzrn4	9.64402e-47	0.303106	0.514	0.518	3.48043e-42	S2	P21
Snrpn	8.41992e-46	0.252226	0.449	0.434	3.03867e-41	S2	P21
Ttc14	9.44691e-46	0.259373	0.886	0.892	3.4093e-41	S2	P21
Stpg2	1.35102e-44	0.330323	0.23	0.178	4.8757e-40	S2	P21
Rspo3	3.60093e-44	0.27843	0.367	0.328	1.29954e-39	S2	P21
Plcb4	2.5078e-43	0.262444	0.676	0.684	9.05038e-39	S2	P21
A830036E02Rik	4.12539e-43	0.269685	0.213	0.152	1.48881e-38	S2	P21
Cadps2	6.62192e-43	0.280751	0.662	0.721	2.38978e-38	S2	P21
Srsf11	3.24384e-42	0.276659	0.779	0.752	1.17067e-37	S2	P21
Igf2bp2	4.59234e-38	0.25874	0.332	0.269	1.65733e-33	S2	P21
Hs6st3	9.00294e-38	0.270276	0.99	0.982	3.24907e-33	S2	P21
Chrm2	2.02151e-36	0.318114	0.232	0.134	7.29541e-32	S2	P21
Ext1	2.52669e-36	0.272273	0.953	0.967	9.11857e-32	S2	P21
A830018L16Rik	5.22376e-36	0.265723	0.892	0.889	1.8852e-31	S2	P21
Nrg3os	6.74863e-35	0.297512	0.701	0.729	2.43551e-30	S2	P21
Dlg2	7.20012e-35	0.356306	0.814	0.683	2.59845e-30	S2	P21
Gm13629	3.66996e-34	0.264722	0.438	0.417	1.32445e-29	S2	P21
Zfp804b	7.64258e-33	0.299326	0.638	0.654	2.75813e-28	S2	P21
Nell1	5.95426e-31	0.366526	0.864	0.831	2.14883e-26	S2	P21
AC129186.1	8.35605e-31	0.359764	0.629	0.571	3.01562e-26	S2	P21
Col26a1	4.68423e-28	0.326618	0.145	0.071	1.69049e-23	S2	P21
A230057D06Rik	2.34096e-27	0.314691	0.662	0.596	8.4483e-23	S2	P21
Vwc2l	1.68888e-17	0.314042	0.155	0.145	6.09499e-13	S2	P21
Rora	4.21657e-13	0.407425	0.937	0.957	1.52172e-08	S2	P21
Egfem1	0	2.09401	0.823	0.238	0	Vis	P21
Tenm3	0	1.99737	0.993	0.692	0	Vis	P21
Kcnab1	0	1.50749	0.912	0.344	0	Vis	P21
Reln	0	1.4496	0.903	0.311	0	Vis	P21
Tenm2	0	1.13804	1	0.976	0	Vis	P21
Erg	0	0.996499	0.548	0.045	0	Vis	P21
Galnt17	3.03845e-301	1.08529	0.935	0.399	1.09655e-296	Vis	P21
Dynlt1a	4.58056e-274	0.573039	0.537	0.082	1.65308e-269	Vis	P21
5730522E02Rik	1.59853e-269	0.921087	0.994	0.843	5.76894e-265	Vis	P21
Tuba1a	1.81738e-266	0.706918	0.915	0.387	6.55875e-262	Vis	P21
Galnt14	2.27831e-266	1.02888	0.934	0.486	8.22219e-262	Vis	P21
Stac	1.21039e-263	0.621276	0.41	0.036	4.36818e-259	Vis	P21
Rtl4	1.31345e-260	1.01765	0.806	0.282	4.74012e-256	Vis	P21
Gm47283	8.99653e-247	0.566434	0.829	0.318	3.24676e-242	Vis	P21
Nsd2	6.03632e-237	0.453857	0.825	0.337	2.17845e-232	Vis	P21
Pabpn1	1.21575e-232	0.428541	0.828	0.347	4.3875e-228	Vis	P21
Spats2l	3.92919e-232	0.393711	0.512	0.11	1.41801e-227	Vis	P21
Cpne7	9.15515e-232	0.475842	0.319	0.019	3.304e-227	Vis	P21
Zfp644	2.04129e-231	0.290719	0.805	0.362	7.36681e-227	Vis	P21
Camk2d	8.207e-228	0.568254	0.579	0.133	2.96182e-223	Vis	P21
AY036118	1.55418e-227	0.260142	0.912	0.476	5.60887e-223	Vis	P21
Kcnip3	2.41219e-226	0.544034	0.752	0.269	8.70534e-222	Vis	P21
Hectd4	1.40688e-222	0.587143	0.949	0.49	5.07727e-218	Vis	P21
Bicdl1	6.53894e-219	0.259359	0.801	0.376	2.35984e-214	Vis	P21
Tox3	8.17956e-219	0.460269	0.53	0.12	2.95192e-214	Vis	P21
Tubb3	3.04424e-218	0.335355	0.547	0.141	1.09864e-213	Vis	P21
Runx1t1	6.39097e-218	0.743743	0.884	0.409	2.30644e-213	Vis	P21
Smpd3	3.7226e-217	0.347159	0.467	0.091	1.34345e-212	Vis	P21
Slf2	5.5023e-217	0.505532	0.864	0.387	1.98572e-212	Vis	P21
Hdgfl3	2.99148e-216	0.307936	0.692	0.265	1.0796e-211	Vis	P21
AC165953.2	1.63006e-214	0.364156	0.824	0.376	5.88273e-210	Vis	P21
Eipr1	1.20343e-213	0.321524	0.693	0.264	4.34306e-209	Vis	P21
A330015K06Rik	3.90254e-213	0.454079	0.511	0.114	1.40839e-208	Vis	P21
Gm49353	2.98578e-212	0.336451	0.726	0.292	1.07754e-207	Vis	P21
Adcy8	8.40468e-212	0.856541	0.953	0.558	3.03316e-207	Vis	P21
Ppp4r3a	1.69878e-211	0.306331	0.644	0.228	6.13074e-207	Vis	P21
Tubb2a	2.78225e-211	0.303624	0.679	0.26	1.00409e-206	Vis	P21
Nsd3	1.33884e-210	0.528225	0.965	0.534	4.83173e-206	Vis	P21
Samm50	1.03452e-209	0.308359	0.569	0.172	3.73349e-205	Vis	P21
Cntn3	2.89798e-208	0.755079	0.995	0.879	1.04585e-203	Vis	P21
Tspoap1	6.58165e-208	0.338225	0.77	0.331	2.37525e-203	Vis	P21
Gsg1l	1.45747e-207	0.370573	0.433	0.077	5.25988e-203	Vis	P21
Bicral	1.81526e-205	0.290269	0.618	0.214	6.55108e-201	Vis	P21
Tubb2b	3.02693e-205	0.330919	0.5	0.125	1.09239e-200	Vis	P21
Cbx6	2.49517e-204	0.268633	0.634	0.234	9.00481e-200	Vis	P21
Tshz3	3.26041e-202	0.679631	0.938	0.514	1.17665e-197	Vis	P21
Camk2n1	5.73986e-201	0.342415	0.604	0.198	2.07146e-196	Vis	P21
Virma	1.51246e-200	0.268371	0.652	0.254	5.45832e-196	Vis	P21
Mia2	8.35924e-199	0.355971	0.794	0.361	3.01677e-194	Vis	P21
Cnot3	2.1281e-198	0.275339	0.709	0.301	7.68009e-194	Vis	P21
AC129186.1	3.66365e-198	0.750334	0.955	0.536	1.32218e-193	Vis	P21
Tubb5	5.53066e-198	0.355821	0.603	0.196	1.99596e-193	Vis	P21
Bcl11a	4.10668e-196	0.727635	0.979	0.735	1.48206e-191	Vis	P21
Tmem181a	3.07284e-195	0.500933	0.864	0.408	1.10896e-190	Vis	P21
Vrk2	3.75497e-193	0.526037	0.584	0.168	1.35513e-188	Vis	P21
Gucy1b1	2.67139e-191	0.34055	0.7	0.283	9.64077e-187	Vis	P21
C230057M02Rik	3.28876e-191	0.322333	0.612	0.213	1.18688e-186	Vis	P21
Tox2	8.34103e-191	0.369462	0.596	0.195	3.01019e-186	Vis	P21
A230057D06Rik	5.20658e-190	0.426035	0.961	0.565	1.879e-185	Vis	P21
Retreg1	9.44927e-190	0.288376	0.657	0.261	3.41015e-185	Vis	P21
Nisch	1.66801e-189	0.53844	0.921	0.489	6.01968e-185	Vis	P21
Ly6h	4.59668e-189	0.291233	0.596	0.213	1.6589e-184	Vis	P21
Cmss1	9.338e-189	0.611836	0.952	0.545	3.36999e-184	Vis	P21
C78859	1.90637e-188	0.265796	0.803	0.402	6.8799e-184	Vis	P21
Actb	2.7063e-188	0.32545	0.807	0.387	9.76676e-184	Vis	P21
Mindy2	3.72122e-188	0.280604	0.632	0.243	1.34295e-183	Vis	P21
Efcab6	9.34872e-188	0.476758	0.56	0.154	3.37386e-183	Vis	P21
Cpne4	2.4282e-185	0.600441	0.484	0.105	8.76312e-181	Vis	P21
Cacna1g	3.24132e-185	0.299322	0.656	0.261	1.16976e-180	Vis	P21
Sorbs1	7.07404e-185	0.783004	0.995	0.821	2.55295e-180	Vis	P21
Dcaf1	9.92415e-185	0.27241	0.551	0.183	3.58153e-180	Vis	P21
Lars2	2.48561e-184	0.261467	0.632	0.25	8.97031e-180	Vis	P21
Galnt18	4.08172e-184	0.795864	0.981	0.743	1.47305e-179	Vis	P21
Chl1	3.4734e-182	0.591748	0.862	0.419	1.25351e-177	Vis	P21
Asap2	2.58627e-181	0.47116	0.894	0.469	9.33361e-177	Vis	P21
Tmem44	5.78831e-179	0.444352	0.649	0.233	2.08894e-174	Vis	P21
Ppp6r2	1.06627e-178	0.349951	0.839	0.424	3.84806e-174	Vis	P21
Dlg2	1.3503e-178	0.486036	1	0.671	4.87308e-174	Vis	P21
Rgma	7.38552e-178	0.276493	0.645	0.265	2.66536e-173	Vis	P21
Flrt1	1.94649e-177	0.284142	0.65	0.264	7.02469e-173	Vis	P21
Disp1	2.31139e-177	0.318326	0.581	0.206	8.34157e-173	Vis	P21
Nasp	2.5885e-177	0.260079	0.55	0.193	9.34164e-173	Vis	P21
Kcnk9	4.88857e-177	0.250819	0.579	0.216	1.76424e-172	Vis	P21
Kcnn3	7.10071e-177	0.357503	0.326	0.041	2.56258e-172	Vis	P21
Sh2d5	1.52766e-176	0.361293	0.564	0.179	5.51317e-172	Vis	P21
2001-03-01	1.78257e-176	0.859231	0.904	0.518	6.43313e-172	Vis	P21
Sh3d19	2.21737e-176	0.459156	0.561	0.169	8.00228e-172	Vis	P21
Snx32	6.46105e-172	0.277717	0.676	0.294	2.33173e-167	Vis	P21
Cpt1c	6.79749e-172	0.272681	0.645	0.269	2.45315e-167	Vis	P21
Hsp90b1	2.12091e-171	0.255808	0.635	0.266	7.65414e-167	Vis	P21
Trank1	2.5391e-167	0.552026	0.918	0.517	9.16334e-163	Vis	P21
Galntl6	1.51619e-166	0.873566	0.997	0.895	5.47179e-162	Vis	P21
Kcnb2	2.11642e-166	0.906219	0.993	0.876	7.63796e-162	Vis	P21
Ice1	9.41996e-166	0.323791	0.879	0.487	3.39957e-161	Vis	P21
Nsg2	2.90005e-165	0.272451	0.753	0.372	1.0466e-160	Vis	P21
Ripor2	2.3226e-164	0.317145	0.564	0.201	8.38204e-160	Vis	P21
Tspan9	3.84903e-164	0.305611	0.501	0.16	1.38908e-159	Vis	P21
Ccdc88c	1.0342e-162	0.334648	0.561	0.196	3.73232e-158	Vis	P21
Slit3	4.7224e-162	0.67114	0.998	0.953	1.70427e-157	Vis	P21
Matk	7.98113e-162	0.315144	0.799	0.404	2.88031e-157	Vis	P21
Cadm1	2.68185e-160	0.725256	0.992	0.839	9.67853e-156	Vis	P21
Dpysl5	1.84423e-159	0.282606	0.577	0.223	6.65566e-155	Vis	P21
Agrn	1.32701e-157	0.25088	0.577	0.231	4.78906e-153	Vis	P21
Zcchc18	1.49434e-157	0.291753	0.773	0.392	5.39292e-153	Vis	P21
4930587E11Rik	2.47755e-157	0.300247	0.517	0.175	8.94124e-153	Vis	P21
Gm2164	2.93793e-156	0.385527	0.926	0.567	1.06027e-151	Vis	P21
Gm42418	4.95672e-156	0.63792	1	0.935	1.78883e-151	Vis	P21
Gm13052	3.51816e-155	0.327406	0.641	0.268	1.26967e-150	Vis	P21
Klf12	8.37212e-154	0.660371	0.951	0.649	3.02142e-149	Vis	P21
Pabpc4	2.3406e-153	0.254478	0.64	0.287	8.44698e-149	Vis	P21
Etv6	1.26697e-152	0.481385	0.814	0.407	4.57238e-148	Vis	P21
Fndc3a	1.45091e-152	0.308751	0.747	0.371	5.2362e-148	Vis	P21
Trpc5	5.23933e-152	0.748555	0.749	0.339	1.89082e-147	Vis	P21
Cntn6	6.10106e-151	0.670527	0.975	0.694	2.20181e-146	Vis	P21
Utrn	1.66715e-150	0.796193	0.864	0.489	6.01657e-146	Vis	P21
Qrfpr	1.61148e-149	0.639627	0.575	0.191	5.81569e-145	Vis	P21
Clk1	6.14223e-149	0.356734	0.911	0.54	2.21667e-144	Vis	P21
Ptpn5	1.69683e-148	0.263007	0.804	0.439	6.12368e-144	Vis	P21
Cdh4	7.352e-147	0.898672	0.803	0.425	2.65326e-142	Vis	P21
Grin2b	1.94031e-146	0.454086	0.998	0.996	7.0024e-142	Vis	P21
Prkd1	2.65306e-146	0.389391	0.408	0.101	9.57463e-142	Vis	P21
Galnt7	3.88826e-146	0.591353	0.867	0.478	1.40324e-141	Vis	P21
Lrrn3	1.645e-145	0.33972	0.47	0.143	5.93665e-141	Vis	P21
Yap1	1.96884e-145	0.26472	0.466	0.154	7.10536e-141	Vis	P21
Dgkg	2.54497e-145	0.577141	0.694	0.294	9.18453e-141	Vis	P21
Unc5d	3.32814e-145	0.799411	0.649	0.253	1.20109e-140	Vis	P21
Kazn	6.31326e-145	0.258903	0.559	0.227	2.27839e-140	Vis	P21
Ncald	7.52146e-145	0.65548	0.619	0.229	2.71442e-140	Vis	P21
Nexmif	4.15855e-144	0.30025	0.526	0.191	1.50078e-139	Vis	P21
Tiam1	9.894e-144	0.584634	0.88	0.499	3.57065e-139	Vis	P21
Tspan33	2.15907e-143	0.383816	0.416	0.104	7.79185e-139	Vis	P21
Sema6a	4.03158e-143	0.327768	0.59	0.238	1.45496e-138	Vis	P21
Ildr2	1.30703e-142	0.407844	0.738	0.353	4.71696e-138	Vis	P21
Sez6	9.7639e-142	0.322465	0.793	0.422	3.52369e-137	Vis	P21
Mtss1	1.70463e-140	0.353105	0.759	0.382	6.15183e-136	Vis	P21
Tbc1d1	1.73778e-140	0.288979	0.554	0.219	6.27149e-136	Vis	P21
Eml1	3.11435e-140	0.256336	0.803	0.447	1.12394e-135	Vis	P21
Ank1	3.58891e-140	0.355363	0.817	0.441	1.2952e-135	Vis	P21
Serpine2	1.15641e-139	0.308466	0.73	0.369	4.17337e-135	Vis	P21
Lrrk2	1.73505e-136	0.392012	0.716	0.341	6.26161e-132	Vis	P21
Rxfp1	5.83526e-136	0.379197	0.503	0.171	2.10589e-131	Vis	P21
Mb21d2	7.38223e-136	0.271715	0.747	0.395	2.66417e-131	Vis	P21
Tmem150c	8.85664e-136	0.345358	0.764	0.397	3.19627e-131	Vis	P21
Dip2a	3.39724e-135	0.290028	0.785	0.43	1.22603e-130	Vis	P21
Timm44	1.85628e-134	0.333826	0.895	0.541	6.69914e-130	Vis	P21
Cntn5	3.61616e-134	0.680629	0.948	0.644	1.30504e-129	Vis	P21
AC149090.1	4.62407e-132	0.361421	0.779	0.418	1.66878e-127	Vis	P21
Kcnd3	4.89113e-132	0.587457	0.793	0.408	1.76516e-127	Vis	P21
Fn1	7.06403e-131	0.581136	0.214	0.017	2.54934e-126	Vis	P21
Chd5	3.00726e-130	0.27753	0.918	0.586	1.08529e-125	Vis	P21
Zfp462	3.84428e-129	0.547824	0.809	0.431	1.38736e-124	Vis	P21
Rnf121	3.09775e-128	0.44426	0.8	0.427	1.11795e-123	Vis	P21
D430041D05Rik	1.38366e-126	0.608369	0.987	0.895	4.99348e-122	Vis	P21
Satb1	2.83871e-125	0.450501	0.752	0.384	1.02446e-120	Vis	P21
Adamts17	7.83322e-125	0.423598	0.487	0.161	2.82693e-120	Vis	P21
Sgsm1	1.12144e-124	0.286039	0.795	0.454	4.04717e-120	Vis	P21
Rasgef1a	1.15524e-123	0.2687	0.914	0.592	4.16915e-119	Vis	P21
Nfix	4.86753e-123	0.369327	0.921	0.592	1.75664e-118	Vis	P21
Tmtc2	3.28729e-122	0.957827	0.854	0.521	1.18635e-117	Vis	P21
Rcan2	2.76523e-120	0.256547	0.665	0.341	9.97943e-116	Vis	P21
Csgalnact1	2.87907e-120	0.388968	0.722	0.366	1.03903e-115	Vis	P21
Fxr1	1.5769e-119	0.301351	0.885	0.554	5.69088e-115	Vis	P21
Gm26905	1.66066e-119	0.36051	0.535	0.21	5.99317e-115	Vis	P21
Cacna1c	1.87453e-119	0.584176	0.982	0.832	6.76499e-115	Vis	P21
Ust	5.5784e-119	0.681998	0.793	0.433	2.01319e-114	Vis	P21
Tcf4	1.30518e-118	0.463143	0.995	0.952	4.71026e-114	Vis	P21
Lmo4	3.65071e-118	0.250858	0.618	0.302	1.3175e-113	Vis	P21
Dcc	3.68139e-118	1.46952	0.648	0.291	1.32858e-113	Vis	P21
Dync2h1	5.63249e-118	0.298549	0.848	0.512	2.03271e-113	Vis	P21
Cds1	4.87329e-117	0.311545	0.858	0.525	1.75872e-112	Vis	P21
Mlip	5.79391e-117	0.265792	0.771	0.44	2.09096e-112	Vis	P21
Limch1	1.35435e-116	0.301178	0.655	0.323	4.88771e-112	Vis	P21
Ssbp3	1.36088e-114	0.265378	0.874	0.556	4.91128e-110	Vis	P21
Vat1l	6.13586e-114	0.46435	0.656	0.307	2.21437e-109	Vis	P21
Srsf5	2.08651e-113	0.272679	0.861	0.539	7.52999e-109	Vis	P21
Npnt	2.179e-113	0.284924	0.558	0.25	7.8638e-109	Vis	P21
Ccdc136	9.64542e-113	0.472772	0.715	0.362	3.48094e-108	Vis	P21
Dock10	1.07499e-112	0.408126	0.353	0.087	3.87955e-108	Vis	P21
Cdh8	1.38606e-112	0.523899	0.993	0.838	5.00214e-108	Vis	P21
Rin2	7.40567e-112	0.283865	0.298	0.066	2.67263e-107	Vis	P21
Srrm1	9.91873e-112	0.27746	0.926	0.625	3.57957e-107	Vis	P21
Anks1b	2.71995e-111	0.303156	1	1	9.81604e-107	Vis	P21
Tmem200a	4.58642e-110	0.324197	0.829	0.503	1.65519e-105	Vis	P21
Rgs20	5.52273e-110	0.264809	0.528	0.235	1.9931e-105	Vis	P21
Adamtsl1	1.66165e-108	0.360096	0.31	0.071	5.99672e-104	Vis	P21
Fnbp1l	5.24106e-108	0.434887	0.987	0.787	1.89145e-103	Vis	P21
Raver2	7.2515e-107	0.250512	0.849	0.542	2.61699e-102	Vis	P21
Rnf112	4.97229e-104	0.299689	0.924	0.631	1.79445e-99	Vis	P21
Kidins220	2.45787e-103	0.394887	0.983	0.768	8.87019e-99	Vis	P21
Man1a2	1.73963e-102	0.265321	0.888	0.589	6.27815e-98	Vis	P21
Lrfn2	1.30406e-101	0.302247	0.798	0.481	4.70622e-97	Vis	P21
Npas3	1.54425e-101	0.525559	0.533	0.217	5.57306e-97	Vis	P21
Hs6st3	5.44048e-100	0.546609	0.999	0.981	1.96341e-95	Vis	P21
Mapk4	4.75769e-99	0.398573	0.475	0.182	1.717e-94	Vis	P21
Tenm4	5.18247e-99	0.448408	0.992	0.935	1.8703e-94	Vis	P21
Astn1	1.14804e-98	0.327047	0.886	0.585	4.14315e-94	Vis	P21
Cwc22	8.40167e-98	0.611025	0.771	0.44	3.03208e-93	Vis	P21
Rarb	1.96477e-97	0.344695	0.453	0.175	7.09066e-93	Vis	P21
Sfpq	1.99244e-97	0.319934	0.967	0.718	7.19052e-93	Vis	P21
Pde10a	5.01291e-97	0.672289	0.985	0.957	1.80911e-92	Vis	P21
Nrip1	1.59309e-95	0.324599	0.624	0.324	5.74929e-91	Vis	P21
Sgk1	1.79635e-95	0.315368	0.89	0.597	6.48285e-91	Vis	P21
Dab1	2.15855e-95	0.282431	1	1	7.79001e-91	Vis	P21
Pde8b	2.33395e-94	0.278032	0.8	0.496	8.42299e-90	Vis	P21
Tcf12	5.78556e-94	0.485523	0.911	0.634	2.08795e-89	Vis	P21
Myt1l	1.30634e-93	0.414248	0.999	0.968	4.71446e-89	Vis	P21
Clstn2	1.61831e-92	0.562575	0.994	0.908	5.84032e-88	Vis	P21
Camk1d	1.7926e-92	0.393981	0.997	0.904	6.46931e-88	Vis	P21
Dscaml1	1.79957e-92	0.619308	0.986	0.903	6.49447e-88	Vis	P21
Dync1i2	7.29647e-92	0.415471	0.963	0.753	2.63322e-87	Vis	P21
Sort1	2.21644e-91	0.279198	0.916	0.643	7.9989e-87	Vis	P21
Robo3	2.55863e-90	0.415494	0.561	0.258	9.23385e-86	Vis	P21
Unc13b	4.249e-90	0.278728	0.795	0.499	1.53342e-85	Vis	P21
Sptbn4	5.04374e-90	0.29377	0.965	0.728	1.82024e-85	Vis	P21
Ptprn	1.23569e-88	0.376612	0.941	0.686	4.45949e-84	Vis	P21
Vps13a	1.43859e-88	0.31485	0.952	0.704	5.19173e-84	Vis	P21
Lmo7	1.94699e-88	0.345288	0.902	0.622	7.02647e-84	Vis	P21
Grin3a	4.76785e-88	0.869035	0.423	0.157	1.72067e-83	Vis	P21
Kcnt2	4.12822e-87	0.302129	0.924	0.661	1.48983e-82	Vis	P21
Syt16	3.38275e-86	0.289294	0.884	0.606	1.2208e-81	Vis	P21
Cacnb2	5.56624e-86	0.301123	0.736	0.441	2.0088e-81	Vis	P21
Ksr1	7.0092e-86	0.296895	0.823	0.537	2.52955e-81	Vis	P21
Esyt2	3.36435e-85	0.276081	0.939	0.688	1.21416e-80	Vis	P21
Rock2	1.60564e-84	0.325437	0.97	0.748	5.79459e-80	Vis	P21
Samd5	1.95589e-84	0.418348	0.37	0.123	7.05861e-80	Vis	P21
Herc2	2.24404e-84	0.264986	0.946	0.702	8.09853e-80	Vis	P21
Pdzrn3	6.92125e-84	0.36969	0.98	0.799	2.49781e-79	Vis	P21
Zmynd8	1.01948e-83	0.282162	0.934	0.682	3.67919e-79	Vis	P21
Ntrk2	4.64879e-83	0.392633	0.997	0.982	1.6777e-78	Vis	P21
Fam189a1	8.78345e-83	0.439	0.99	0.892	3.16986e-78	Vis	P21
Gap43	6.53215e-82	0.257192	0.921	0.67	2.35739e-77	Vis	P21
Pknox2	2.83108e-80	0.373382	0.933	0.689	1.02171e-75	Vis	P21
Gm26848	3.85214e-80	0.381897	0.937	0.702	1.3902e-75	Vis	P21
Smad3	5.8848e-80	0.310993	0.517	0.249	2.12377e-75	Vis	P21
5330434G04Rik	2.01675e-79	0.268303	0.468	0.223	7.27823e-75	Vis	P21
Cnih3	2.1163e-79	0.369189	0.781	0.494	7.63752e-75	Vis	P21
Slc1a1	5.97414e-79	0.291282	0.9	0.641	2.15601e-74	Vis	P21
Ttc28	1.43163e-76	0.351544	0.537	0.267	5.16662e-72	Vis	P21
Pdzd2	7.94864e-76	0.428615	0.988	0.891	2.86858e-71	Vis	P21
Gm20754	1.48041e-75	0.429007	0.98	0.826	5.34266e-71	Vis	P21
Sbf2	1.56053e-75	0.279602	0.92	0.677	5.63178e-71	Vis	P21
Mpped1	6.51912e-75	0.298552	0.941	0.712	2.35268e-70	Vis	P21
Syt9	6.33575e-74	0.303344	0.364	0.139	2.28651e-69	Vis	P21
Adamts2	1.39508e-73	0.507669	0.551	0.27	5.03469e-69	Vis	P21
Maml3	1.60152e-73	0.606483	0.865	0.622	5.77974e-69	Vis	P21
Eml5	3.90944e-73	0.375623	0.987	0.878	1.41088e-68	Vis	P21
Fgf12	9.66239e-73	0.352212	1	0.987	3.48706e-68	Vis	P21
Sorcs1	2.29485e-72	0.524618	0.997	0.979	8.28187e-68	Vis	P21
Gm49171	1.87128e-71	0.346003	0.193	0.036	6.75328e-67	Vis	P21
Arap2	6.80301e-70	0.389604	0.965	0.797	2.45514e-65	Vis	P21
Stxbp6	7.02725e-70	0.503363	0.642	0.363	2.53606e-65	Vis	P21
Myrip	7.71825e-70	0.28688	0.959	0.756	2.78544e-65	Vis	P21
Cdh2	1.02846e-69	0.282051	0.952	0.741	3.71162e-65	Vis	P21
Pbx3	2.61438e-68	0.420181	0.778	0.506	9.43502e-64	Vis	P21
Snrnp70	4.5463e-67	0.317848	0.984	0.872	1.64071e-62	Vis	P21
Jakmip1	1.61332e-66	0.291771	0.968	0.787	5.8223e-62	Vis	P21
Nrg1	1.00073e-65	0.787474	0.981	0.867	3.61152e-61	Vis	P21
Shank2	2.17835e-65	0.263184	0.975	0.798	7.86144e-61	Vis	P21
Son	4.11679e-65	0.298156	0.989	0.879	1.48571e-60	Vis	P21
Mical2	1.83531e-63	0.333735	0.997	0.934	6.62345e-59	Vis	P21
Aig1	4.94437e-63	0.265599	0.958	0.767	1.78437e-58	Vis	P21
Tanc2	5.09778e-62	0.286217	0.999	0.976	1.83974e-57	Vis	P21
Vwc2l	8.64624e-62	0.620948	0.331	0.124	3.12034e-57	Vis	P21
Efr3a	5.02564e-61	0.265597	0.976	0.812	1.8137e-56	Vis	P21
Sez6l	9.68126e-60	0.384948	0.976	0.84	3.49387e-55	Vis	P21
R3hdm2	4.23392e-59	0.319178	0.986	0.893	1.52798e-54	Vis	P21
Zeb1	1.54005e-58	0.270024	0.975	0.82	5.55788e-54	Vis	P21
Ehbp1	5.21844e-57	0.371647	0.974	0.853	1.88328e-52	Vis	P21
Edil3	6.02438e-57	0.293362	0.924	0.722	2.17414e-52	Vis	P21
Phf24	5.80576e-55	0.264534	0.939	0.751	2.09524e-50	Vis	P21
Sorl1	2.48816e-54	0.292151	0.994	0.92	8.97954e-50	Vis	P21
Spock3	8.17625e-54	0.472564	0.509	0.276	2.95073e-49	Vis	P21
Fry	1.2427e-53	0.308805	0.981	0.873	4.48478e-49	Vis	P21
Rora	3.52551e-53	0.574473	0.994	0.949	1.27232e-48	Vis	P21
Caln1	5.93898e-53	0.273238	0.938	0.754	2.14332e-48	Vis	P21
Pdzrn4	1.8225e-52	0.256655	0.719	0.493	6.57723e-48	Vis	P21
Ryr3	2.72528e-52	0.314174	0.993	0.906	9.83525e-48	Vis	P21
Htr2a	1.13259e-51	0.436919	0.34	0.144	4.08741e-47	Vis	P21
Mical3	1.4412e-51	0.264183	0.977	0.84	5.20114e-47	Vis	P21
Fam19a1	4.08106e-50	0.326767	1	0.999	1.47281e-45	Vis	P21
Srgap3	4.75525e-50	0.269977	0.98	0.865	1.71612e-45	Vis	P21
Robo1	8.12849e-50	0.269746	0.997	0.948	2.93349e-45	Vis	P21
Ntrk3	5.26676e-49	0.327581	0.987	0.941	1.90072e-44	Vis	P21
Kcnn2	5.37265e-48	0.278196	0.99	0.923	1.93893e-43	Vis	P21
Slc24a3	1.11126e-47	0.324965	0.415	0.214	4.01043e-43	Vis	P21
Unc80	1.46085e-47	0.273995	0.993	0.957	5.27204e-43	Vis	P21
Plekha5	4.99845e-47	0.253334	0.985	0.893	1.80389e-42	Vis	P21
Kcnmb2	5.67423e-47	0.389047	0.298	0.121	2.04777e-42	Vis	P21
Gria4	2.33913e-46	0.309579	0.972	0.853	8.44168e-42	Vis	P21
Xkr6	1.77968e-42	0.26261	0.948	0.8	6.42268e-38	Vis	P21
Dpp6	3.6732e-41	0.258661	0.993	0.937	1.32562e-36	Vis	P21
Arhgap26	7.63866e-41	0.259066	0.996	0.959	2.75671e-36	Vis	P21
Plxna2	8.29261e-41	0.306871	0.939	0.785	2.99272e-36	Vis	P21
Lncpint	7.02473e-39	0.261482	0.995	0.959	2.53515e-34	Vis	P21
Slc8a1	3.51468e-34	0.296366	0.997	0.976	1.26841e-29	Vis	P21
Celf4	4.16154e-30	0.341153	0.954	0.849	1.50186e-25	Vis	P21
Lypd1	6.39078e-28	0.260275	0.267	0.131	2.30637e-23	Vis	P21
Grip1	3.27701e-26	0.299515	0.96	0.868	1.18264e-21	Vis	P21
AC121788.1	1.06158e-25	0.363502	0.369	0.234	3.83113e-21	Vis	P21
Ldb2	5.09319e-20	0.377926	0.931	0.894	1.83808e-15	Vis	P21
Kirrel3	9.86503e-20	0.531828	0.98	0.965	3.56019e-15	Vis	P21
Lrrtm3	5.57222e-18	0.287786	0.936	0.92	2.01096e-13	Vis	P21
Xist	4.85722e-15	0.47371	0.591	0.462	1.75292e-10	Vis	P21
Zfp804b	3.29496e-12	0.618289	0.733	0.641	1.18912e-07	Vis	P21
Lrrc4c	1.79827e-11	0.367546	0.988	0.947	6.48976e-07	Vis	P21
Gpc5	0	1.48119	0.904	0.619	0	MO	P12
Pcdh15	0	1.43977	0.772	0.365	0	MO	P12
Opcml	0	0.57318	1	0.998	0	MO	P12
Grid2	2.47526888566465e-321	0.620871	0.997	0.96	8.93299788147514e-317	MO	P12
Spag5	1.09875e-296	1.15256	0.38	0.162	3.96528e-292	MO	P12
Nkain3	9.52969e-280	0.882012	0.789	0.503	3.43917e-275	MO	P12
St6galnac5	2.62047e-249	1.20032	0.705	0.418	9.457e-245	MO	P12
Pde1a	6.89759e-249	0.806002	0.876	0.58	2.48927e-244	MO	P12
Cadm2	2.7913e-232	0.428986	1	0.997	1.00735e-227	MO	P12
Tnr	3.29369e-232	0.818634	0.861	0.67	1.18866e-227	MO	P12
Mgat4c	2.93608e-226	0.811331	0.836	0.603	1.0596e-221	MO	P12
Fras1	2.40351e-223	0.833381	0.741	0.488	8.67402e-219	MO	P12
Gm44511	3.9857e-217	0.603604	0.335	0.124	1.4384e-212	MO	P12
Ptprt	4.33421e-212	0.751048	0.841	0.621	1.56417e-207	MO	P12
Astn2	3.34629e-204	1.01746	0.827	0.715	1.20764e-199	MO	P12
Ldb2	4.29887e-201	0.571664	0.965	0.9	1.55142e-196	MO	P12
L3mbtl4	1.69501e-198	0.821126	0.671	0.372	6.11714e-194	MO	P12
Pitpnc1	4.69898e-193	0.739436	0.659	0.379	1.69582e-188	MO	P12
Kcnip4	3.54291e-188	0.444437	1	1	1.2786e-183	MO	P12
Ndst3	8.74147e-185	0.770255	0.736	0.487	3.15471e-180	MO	P12
Lsamp	1.34089e-180	1.23308	0.916	0.858	4.83915e-176	MO	P12
Cdh11	1.26716e-179	0.637158	0.825	0.624	4.57307e-175	MO	P12
Malat1	1.946e-177	0.313468	1	1	7.0229e-173	MO	P12
Crim1	1.11313e-176	0.688992	0.632	0.364	4.01719e-172	MO	P12
Adamts18	2.57385e-175	0.683847	0.431	0.156	9.28876e-171	MO	P12
Gm28928	1.15568e-171	0.37131	1	0.996	4.17075e-167	MO	P12
Gabrb2	4.22472e-158	0.54991	0.874	0.749	1.52466e-153	MO	P12
Gria3	7.266e-157	0.479666	0.955	0.832	2.62223e-152	MO	P12
Pigk	1.33174e-156	0.752212	0.623	0.442	4.8061e-152	MO	P12
Ephb1	5.72644e-155	0.603659	0.812	0.634	2.06662e-150	MO	P12
Fstl5	2.63424e-154	0.67766	0.734	0.513	9.5067e-150	MO	P12
Diaph3	2.54891e-153	0.584965	0.364	0.134	9.19876e-149	MO	P12
Cacnb4	4.06548e-148	0.448516	0.97	0.954	1.46719e-143	MO	P12
Sgcz	2.98369e-141	0.377528	0.996	0.972	1.07678e-136	MO	P12
Msra	1.80614e-139	0.479243	0.935	0.88	6.5182e-135	MO	P12
Atrnl1	4.29935e-136	0.442351	0.947	0.898	1.55159e-131	MO	P12
Runx2	3.12356e-134	0.577817	0.579	0.334	1.12726e-129	MO	P12
Ryr3	9.01715e-133	0.494274	0.926	0.808	3.2542e-128	MO	P12
Cttnbp2	1.08905e-132	0.397723	0.964	0.947	3.93028e-128	MO	P12
Gm28153	9.40911e-131	0.50612	0.252	0.097	3.39565e-126	MO	P12
Hdac9	2.90422e-123	0.375081	0.982	0.947	1.0481e-118	MO	P12
Nedd4l	1.95993e-119	0.436387	0.914	0.836	7.07319e-115	MO	P12
Rab3c	4.59334e-118	0.502176	0.884	0.765	1.65769e-113	MO	P12
Sema6d	7.05976e-117	0.368733	0.984	0.946	2.5478e-112	MO	P12
Zfp608	4.47452e-112	0.494432	0.401	0.199	1.61481e-107	MO	P12
Ncam2	9.24871e-112	0.348846	0.983	0.92	3.33777e-107	MO	P12
Meis2	2.19717e-111	0.51248	0.821	0.693	7.92938e-107	MO	P12
Man2a1	5.09349e-111	0.543029	0.64	0.463	1.83819e-106	MO	P12
St6galnac3	3.12853e-110	0.717452	0.821	0.757	1.12905e-105	MO	P12
Foxp2	3.46706e-110	0.588008	0.493	0.285	1.25123e-105	MO	P12
Gm20417	1.50948e-109	0.265649	0.191	0.064	5.44754e-105	MO	P12
Pcdh17	7.91895e-108	0.518905	0.524	0.329	2.85787e-103	MO	P12
Enox1	1.8463e-107	0.434312	0.931	0.881	6.6631e-103	MO	P12
Nckap5	1.06608e-105	0.562423	0.512	0.307	3.84739e-101	MO	P12
Spon1	1.20105e-105	0.519331	0.617	0.401	4.33447e-101	MO	P12
Xylt1	2.91788e-103	0.373125	0.93	0.778	1.05303e-98	MO	P12
Gpc6	2.91034e-102	0.544891	0.937	0.843	1.05031e-97	MO	P12
Lhfp	1.09739e-96	0.571211	0.504	0.305	3.96037e-92	MO	P12
Aff3	1.19635e-95	0.373711	0.907	0.855	4.31751e-91	MO	P12
Cntnap5b	2.18587e-95	0.575346	0.722	0.57	7.8886e-91	MO	P12
6430573F11Rik	4.69095e-95	0.48665	0.519	0.328	1.69292e-90	MO	P12
Klhl29	6.3587e-93	0.443809	0.906	0.799	2.29479e-88	MO	P12
Dpp10	2.04217e-90	0.26772	0.994	0.981	7.37e-86	MO	P12
Gm2163	1.39211e-88	0.661899	0.364	0.198	5.02397e-84	MO	P12
Kcnq5	1.45094e-87	0.257884	0.996	0.991	5.23629e-83	MO	P12
Trmt13	3.58325e-87	0.637877	0.293	0.198	1.29316e-82	MO	P12
Socs2	8.05569e-86	0.354038	0.247	0.098	2.90722e-81	MO	P12
Il1rap	4.0154e-83	0.463866	0.497	0.314	1.44912e-78	MO	P12
Grik4	6.32855e-83	0.485632	0.553	0.358	2.28391e-78	MO	P12
Pappa2	1.64315e-82	0.330255	0.16	0.041	5.92997e-78	MO	P12
Gm26871	1.70482e-82	0.830769	0.402	0.222	6.15254e-78	MO	P12
Epha6	5.28203e-82	0.270848	0.947	0.837	1.90623e-77	MO	P12
Spock1	7.95232e-82	0.364659	0.914	0.801	2.86991e-77	MO	P12
Khdrbs3	1.33101e-81	0.282963	0.979	0.957	4.80349e-77	MO	P12
Rph3a	1.86232e-81	0.454714	0.519	0.335	6.72091e-77	MO	P12
Gm17167	3.60613e-81	0.659557	0.384	0.211	1.30142e-76	MO	P12
Phf20l1	6.79245e-81	0.380398	0.85	0.767	2.45133e-76	MO	P12
Trerf1	1.0574e-78	0.33637	0.391	0.22	3.81606e-74	MO	P12
Lypd1	1.08941e-75	0.258943	0.276	0.119	3.93158e-71	MO	P12
Mkx	3.20176e-75	0.416414	0.608	0.429	1.15548e-70	MO	P12
Mir99ahg	1.07386e-74	0.530827	0.357	0.197	3.87545e-70	MO	P12
Zdhhc14	4.57619e-74	0.428176	0.632	0.475	1.6515e-69	MO	P12
Mad1l1	4.77448e-73	0.415559	0.441	0.303	1.72306e-68	MO	P12
Snhg14	1.11991e-71	0.578166	0.405	0.225	4.04165e-67	MO	P12
Cep112	5.76093e-70	0.443763	0.408	0.241	2.07906e-65	MO	P12
3300002A11Rik	5.84916e-70	0.262118	0.139	0.048	2.1109e-65	MO	P12
Gm38073	2.43413e-69	0.573886	0.38	0.203	8.78454e-65	MO	P12
Gm27247	3.18664e-68	0.613989	0.373	0.207	1.15003e-63	MO	P12
Dlg2.1	3.46218e-67	0.800646	0.408	0.226	1.24947e-62	MO	P12
Rian	3.60674e-67	0.671973	0.405	0.224	1.30164e-62	MO	P12
9330162G02Rik	4.16381e-67	0.659634	0.403	0.221	1.50268e-62	MO	P12
Sema3c	7.2921e-67	0.394173	0.316	0.167	2.63165e-62	MO	P12
Epha5	8.15794e-67	0.2952	0.97	0.939	2.94412e-62	MO	P12
Tmeff1	5.48787e-65	0.383221	0.474	0.351	1.98052e-60	MO	P12
Gm29536	2.04289e-64	0.251883	0.209	0.106	7.37259e-60	MO	P12
Gm15398	6.83842e-64	0.266737	0.17	0.053	2.46792e-59	MO	P12
Tox	1.08599e-62	0.283517	0.93	0.842	3.91924e-58	MO	P12
Prickle2	4.64762e-62	0.266566	0.977	0.94	1.67728e-57	MO	P12
Fam135b	1.30258e-61	0.319947	0.909	0.863	4.70086e-57	MO	P12
Gm26804	9.19861e-61	0.334853	0.297	0.186	3.31969e-56	MO	P12
Tmtc1	1.32525e-60	0.357101	0.812	0.669	4.78268e-56	MO	P12
Sorl1	4.4461e-60	0.288498	0.933	0.861	1.60455e-55	MO	P12
Gm12394	2.61208e-59	0.486137	0.383	0.215	9.42675e-55	MO	P12
Neto1	3.20679e-59	0.35124	0.841	0.773	1.1573e-54	MO	P12
Gm30382	6.70494e-59	0.373278	0.859	0.733	2.41974e-54	MO	P12
Epha7	1.65221e-58	0.371321	0.742	0.637	5.96266e-54	MO	P12
Thrb	4.25061e-58	0.250782	0.969	0.937	1.534e-53	MO	P12
C77370	5.14162e-58	0.297323	0.237	0.135	1.85556e-53	MO	P12
Kcnip1	1.39125e-57	0.276083	0.182	0.066	5.02087e-53	MO	P12
RP24-349L11.1	5.97308e-57	0.292454	0.249	0.148	2.15563e-52	MO	P12
Dmd	1.40053e-56	0.272587	0.951	0.891	5.05436e-52	MO	P12
Slc1a2	3.73613e-56	0.395378	0.46	0.31	1.34833e-51	MO	P12
Gm4258	1.13565e-55	0.43955	0.345	0.198	4.09843e-51	MO	P12
Gprin3	3.62872e-54	0.342788	0.46	0.313	1.30957e-49	MO	P12
Sulf2	1.00288e-51	0.357288	0.564	0.416	3.61929e-47	MO	P12
4930447C04Rik	6.18307e-50	0.33531	0.32	0.182	2.23141e-45	MO	P12
Cdh13	7.73019e-50	0.26021	0.916	0.833	2.78975e-45	MO	P12
Cntn1	6.22414e-49	0.254765	0.943	0.929	2.24623e-44	MO	P12
A330023F24Rik	8.51894e-49	0.362854	0.325	0.196	3.0744e-44	MO	P12
Gm44560	1.14814e-47	0.350696	0.354	0.206	4.14353e-43	MO	P12
Grm8	2.76768e-47	0.283088	0.917	0.858	9.98829e-43	MO	P12
Col8a1	6.41316e-47	0.351114	0.116	0.036	2.31444e-42	MO	P12
2610203C20Rik	9.36174e-47	0.386843	0.352	0.207	3.37856e-42	MO	P12
Gm15800	1.54034e-46	0.276268	0.356	0.212	5.55892e-42	MO	P12
Tmem181b-ps	9.7531e-46	0.3187	0.286	0.178	3.5198e-41	MO	P12
a	5.52562e-45	0.253464	0.143	0.065	1.99414e-40	MO	P12
A930011G23Rik	6.23689e-45	0.42514	0.323	0.188	2.25083e-40	MO	P12
Sorbs2	9.05919e-44	0.265416	0.86	0.769	3.26937e-39	MO	P12
Gm16432	1.3296e-42	0.342506	0.335	0.199	4.79839e-38	MO	P12
Cacnb2	3.90445e-42	0.322749	0.544	0.41	1.40908e-37	MO	P12
Pde4b	7.84035e-42	0.271483	0.727	0.586	2.8295e-37	MO	P12
Sltm	8.63452e-42	0.258905	0.704	0.643	3.11611e-37	MO	P12
Sv2b	1.33821e-41	0.254651	0.891	0.814	4.82948e-37	MO	P12
Whsc1l1	8.01672e-41	0.307748	0.341	0.206	2.89315e-36	MO	P12
Csrnp3	1.62613e-40	0.26034	0.864	0.811	5.86853e-36	MO	P12
Ano4	1.98972e-40	0.263556	0.876	0.804	7.18071e-36	MO	P12
Ak5	3.59621e-40	0.30461	0.435	0.298	1.29784e-35	MO	P12
Cdh10	5.77812e-40	0.290991	0.769	0.644	2.08527e-35	MO	P12
Nlk	1.55113e-39	0.267339	0.863	0.804	5.59786e-35	MO	P12
Stxbp5l	3.16792e-39	0.264913	0.855	0.806	1.14327e-34	MO	P12
Pabpc4	4.74888e-39	0.261281	0.317	0.196	1.71382e-34	MO	P12
RP24-263E2.3	5.49512e-39	0.275088	0.292	0.182	1.98313e-34	MO	P12
Adgrg6	6.94219e-39	0.254543	0.121	0.048	2.50537e-34	MO	P12
Gabra1	1.64734e-38	0.298954	0.508	0.407	5.94507e-34	MO	P12
Parp8	2.00368e-38	0.281481	0.698	0.594	7.23107e-34	MO	P12
Bach2	4.77614e-38	0.267844	0.867	0.787	1.72366e-33	MO	P12
Shc3	6.76141e-38	0.287769	0.634	0.516	2.44013e-33	MO	P12
Zcchc16	8.86546e-38	0.316898	0.287	0.166	3.19946e-33	MO	P12
Ano3	2.99942e-37	0.283918	0.748	0.619	1.08246e-32	MO	P12
A230103L15Rik	3.49964e-37	0.285672	0.312	0.192	1.26299e-32	MO	P12
Ptprr	3.89966e-37	0.293738	0.649	0.551	1.40735e-32	MO	P12
A330008L17Rik	5.30323e-37	0.407583	0.476	0.387	1.91388e-32	MO	P12
Grid1	1.01102e-36	0.263269	0.848	0.8	3.64866e-32	MO	P12
A330076H08Rik	3.58849e-34	0.270348	0.318	0.197	1.29505e-29	MO	P12
Met	7.37433e-34	0.268672	0.399	0.281	2.66132e-29	MO	P12
Pcdh11x	1.10696e-33	0.326226	0.611	0.496	3.99492e-29	MO	P12
Zswim6	4.01863e-33	0.259126	0.322	0.201	1.45028e-28	MO	P12
Wwc1	1.4445e-32	0.285712	0.856	0.806	5.21307e-28	MO	P12
Kctd1	9.10101e-32	0.254689	0.391	0.285	3.28446e-27	MO	P12
Gm1043	4.4712e-31	0.271093	0.308	0.195	1.61361e-26	MO	P12
Dtnb	1.18637e-30	0.259111	0.703	0.622	4.28149e-26	MO	P12
Ptpro	1.76127e-30	0.282683	0.54	0.432	6.35624e-26	MO	P12
Kcnj3	1.1227e-25	0.25223	0.743	0.671	4.05172e-21	MO	P12
Hs6st3	1.54828e-214	0.583319	0.997	0.983	5.58759e-210	S1	P12
Cntnap5a	8.3401e-159	0.528281	0.986	0.963	3.00986e-154	S1	P12
Bcl11a	9.96884e-149	0.579179	0.865	0.635	3.59765e-144	S1	P12
Brinp3	2.49189e-147	0.786957	0.825	0.63	8.99297e-143	S1	P12
Sox5	4.1672e-117	0.378496	0.994	0.984	1.5039e-112	S1	P12
Col6a1	9.80709e-114	0.411304	0.255	0.066	3.53928e-109	S1	P12
Slc24a2	4.78872e-109	0.538585	0.908	0.778	1.7282e-104	S1	P12
A330102I10Rik	1.84994e-107	0.516828	0.693	0.441	6.67625e-103	S1	P12
Bmpr1b	1.28331e-92	0.449065	0.313	0.116	4.63132e-88	S1	P12
Pde8b	2.47961e-88	0.391835	0.501	0.27	8.94866e-84	S1	P12
5730522E02Rik	9.0251e-87	0.398317	0.937	0.852	3.25707e-82	S1	P12
Efna5	3.55851e-82	0.496137	0.927	0.877	1.28423e-77	S1	P12
Arid1b	1.60686e-80	0.404322	0.92	0.837	5.79898e-76	S1	P12
Sv2c	1.15209e-76	0.387039	0.4	0.198	4.15778e-72	S1	P12
Rcan2	5.50679e-73	0.347114	0.413	0.214	1.98735e-68	S1	P12
Negr1	3.98993e-72	0.313911	0.993	0.978	1.43993e-67	S1	P12
Wscd2	2.28144e-69	0.349457	0.716	0.508	8.2335e-65	S1	P12
Ltbp1	7.03339e-69	0.501071	0.313	0.139	2.53828e-64	S1	P12
Col26a1	1.24592e-66	0.413849	0.175	0.05	4.49639e-62	S1	P12
Igf2bp2	5.26262e-66	0.289732	0.391	0.206	1.89923e-61	S1	P12
Vrk2	7.67984e-65	0.259509	0.265	0.112	2.77158e-60	S1	P12
Camta1	1.00586e-64	0.290621	0.992	0.974	3.63004e-60	S1	P12
Rgs6	8.57019e-64	0.417627	0.901	0.804	3.0929e-59	S1	P12
Cntn6	5.21192e-63	0.397546	0.879	0.827	1.88093e-58	S1	P12
Chrm2	3.04528e-61	0.303456	0.401	0.222	1.09901e-56	S1	P12
Rxfp1	2.48883e-58	0.283536	0.412	0.236	8.98192e-54	S1	P12
Htr1f	3.38354e-58	0.395329	0.883	0.771	1.22109e-53	S1	P12
A830018L16Rik	7.41377e-58	0.30853	0.939	0.881	2.67556e-53	S1	P12
Hs3st5	5.53829e-57	0.361102	0.76	0.588	1.99871e-52	S1	P12
Nell1	1.5481e-56	0.458288	0.762	0.607	5.58693e-52	S1	P12
Olfm3	4.52932e-53	0.326511	0.307	0.153	1.63459e-48	S1	P12
Clstn2	1.22051e-52	0.307772	0.96	0.93	4.40469e-48	S1	P12
Sox5os4	1.27158e-52	0.262565	0.48	0.301	4.58902e-48	S1	P12
Ust	2.68161e-51	0.34027	0.701	0.524	9.67765e-47	S1	P12
Mtcl1	1.07374e-50	0.318101	0.758	0.597	3.87501e-46	S1	P12
Trpm3	2.1109e-50	0.383411	0.87	0.774	7.61802e-46	S1	P12
Arhgap15	2.22282e-48	0.255856	0.514	0.34	8.02195e-44	S1	P12
Specc1	1.23609e-47	0.378997	0.678	0.514	4.46093e-43	S1	P12
Unc5c	3.72002e-47	0.292905	0.955	0.917	1.34252e-42	S1	P12
Gm42418	2.68191e-46	0.416915	0.998	0.983	9.67873e-42	S1	P12
Col24a1	8.60234e-46	0.254587	0.192	0.079	3.1045e-41	S1	P12
Lrrtm4	1.8914e-42	0.351351	0.996	0.981	6.82588e-38	S1	P12
Sema3e	4.38611e-42	0.300801	0.56	0.394	1.5829e-37	S1	P12
Kcnk2	7.55293e-42	0.311289	0.259	0.131	2.72578e-37	S1	P12
Nr3c1	7.17747e-41	0.297915	0.748	0.612	2.59028e-36	S1	P12
Sorcs2	1.74363e-40	0.297996	0.852	0.734	6.2926e-36	S1	P12
Arap2	1.79885e-38	0.261606	0.848	0.734	6.49189e-34	S1	P12
Zfp804b	3.83858e-36	0.505417	0.689	0.609	1.38531e-31	S1	P12
Coro6	2.19943e-35	0.25285	0.405	0.263	7.93751e-31	S1	P12
Cdh20	5.7305e-30	0.281675	0.712	0.58	2.06808e-25	S1	P12
Tmem132d	1.01809e-28	0.255211	0.854	0.763	3.6742e-24	S1	P12
Pcsk5	1.52209e-28	0.250565	0.885	0.858	5.49307e-24	S1	P12
Trerf1	1.00488e-21	0.351082	0.345	0.276	3.62651e-17	S1	P12
Rora	9.52845e-20	0.524435	0.918	0.884	3.43872e-15	S1	P12
Cdh4	1.47643e-12	0.463784	0.454	0.395	5.32828e-08	S1	P12
Snhg14	6.10847e-12	0.288606	0.351	0.286	2.20449e-07	S1	P12
Postn	1.4176e-11	0.34362	0.236	0.168	5.11598e-07	S1	P12
Dlg2.1	9.66269e-09	0.263575	0.352	0.289	0.000348717	S1	P12
Rian	5.41685e-08	0.250035	0.349	0.286	0.00195489	S1	P12
Negr1	9.91641e-125	0.657005	0.994	0.981	3.57873e-120	S2	P12
Cntnap5a	4.36741e-116	0.641924	0.984	0.968	1.57615e-111	S2	P12
Kirrel3	1.4501e-112	0.790904	0.988	0.974	5.23328e-108	S2	P12
Tcerg1l	5.5552e-108	0.695471	0.811	0.724	2.00482e-103	S2	P12
Fam19a2	8.23194e-108	0.822743	0.772	0.61	2.97082e-103	S2	P12
Stxbp6	1.76569e-92	0.931167	0.641	0.353	6.37219e-88	S2	P12
Gm30382	4.78244e-67	0.621494	0.874	0.778	1.72593e-62	S2	P12
Pdzrn3	4.86786e-63	0.588922	0.845	0.747	1.75676e-58	S2	P12
Zfp804b	1.31914e-61	0.789792	0.697	0.626	4.76064e-57	S2	P12
Snhg11	2.83732e-61	0.253618	1	1	1.02396e-56	S2	P12
Slc35f1	3.38121e-59	0.679369	0.714	0.634	1.22025e-54	S2	P12
Chrm2	7.14924e-59	0.6543	0.423	0.258	2.58009e-54	S2	P12
Pdzrn4	2.91463e-58	0.572966	0.716	0.671	1.05186e-53	S2	P12
Dlg2	5.94368e-58	0.479726	0.923	0.701	2.14501e-53	S2	P12
Slc9a9	8.99193e-57	0.479107	0.697	0.653	3.2451e-52	S2	P12
Cntnap5c	3.50259e-54	0.557478	0.552	0.497	1.26405e-49	S2	P12
Pid1	2.07576e-50	0.415489	0.72	0.737	7.49122e-46	S2	P12
AC129186.1	4.86838e-49	0.630228	0.752	0.558	1.75695e-44	S2	P12
Rbfox1	3.56742e-48	0.300509	1	0.999	1.28745e-43	S2	P12
Gria2	7.27817e-48	0.318205	0.987	0.99	2.62662e-43	S2	P12
Iqgap2	3.44659e-47	0.480693	0.511	0.424	1.24384e-42	S2	P12
Pdgfc	6.58613e-47	0.490212	0.421	0.29	2.37687e-42	S2	P12
Gda	2.02967e-46	0.312899	0.663	0.69	7.32489e-42	S2	P12
Abi3bp	4.12372e-45	0.565255	0.217	0.08	1.48821e-40	S2	P12
Scube1	1.93962e-44	0.517187	0.338	0.188	6.99991e-40	S2	P12
Pde4b	2.23169e-43	0.428923	0.666	0.648	8.05393e-39	S2	P12
Gria1	8.53962e-41	0.354383	0.934	0.956	3.08186e-36	S2	P12
Ralgapa2	1.40194e-40	0.334327	0.909	0.924	5.05945e-36	S2	P12
Cdh13	1.80806e-40	0.413769	0.843	0.874	6.52509e-36	S2	P12
Gm36251	6.82795e-40	0.539747	0.294	0.143	2.46414e-35	S2	P12
Cntnap2	3.896e-38	0.340124	0.999	0.998	1.40603e-33	S2	P12
Lrrtm3	8.29022e-38	0.38826	0.863	0.82	2.99186e-33	S2	P12
Htr1f	1.0354e-37	0.433796	0.871	0.797	3.73665e-33	S2	P12
Dpyd	1.06692e-37	0.339436	0.504	0.5	3.8504e-33	S2	P12
Ctnna3	1.71038e-37	0.456116	0.745	0.685	6.17258e-33	S2	P12
A230057D06Rik	1.7937e-37	0.4939	0.769	0.581	6.47327e-33	S2	P12
Adgrl2	1.99117e-37	0.352676	0.715	0.699	7.18594e-33	S2	P12
Pcsk5	3.51343e-37	0.387381	0.872	0.866	1.26796e-32	S2	P12
Gm15155	1.37816e-36	0.379767	0.71	0.685	4.97365e-32	S2	P12
Arhgap15	8.58995e-36	0.448631	0.462	0.385	3.10003e-31	S2	P12
Zranb2	1.60108e-35	0.325954	0.91	0.91	5.77814e-31	S2	P12
Pde10a	1.78278e-35	0.480496	0.882	0.845	6.43389e-31	S2	P12
Eml6	1.28082e-34	0.300085	0.868	0.873	4.62234e-30	S2	P12
Cdh6	4.64885e-34	0.347217	0.731	0.737	1.67772e-29	S2	P12
2011-03-01	4.78612e-34	0.271829	0.603	0.63	1.72726e-29	S2	P12
Cyp7b1	1.6728e-33	0.358452	0.376	0.339	6.03697e-29	S2	P12
Cap2	1.80244e-33	0.290011	0.824	0.838	6.50482e-29	S2	P12
Gabrb1	5.41721e-33	0.343453	0.882	0.894	1.95502e-28	S2	P12
Nav1	7.51442e-33	0.270631	0.852	0.885	2.71188e-28	S2	P12
Samd12	1.17847e-32	0.258914	0.852	0.885	4.25299e-28	S2	P12
Pnisr	2.13457e-32	0.264021	0.774	0.808	7.70346e-28	S2	P12
Fgf12	7.91295e-32	0.28348	0.99	0.986	2.8557e-27	S2	P12
Oxr1	8.97768e-31	0.37758	0.851	0.824	3.23995e-26	S2	P12
Trpc7	1.13235e-30	0.477264	0.278	0.148	4.08654e-26	S2	P12
Cacna1e	2.10231e-30	0.306417	0.929	0.929	7.58703e-26	S2	P12
Mbnl2	1.36402e-29	0.26096	0.797	0.819	4.92262e-25	S2	P12
Sox5	2.82399e-29	0.278703	0.995	0.986	1.01915e-24	S2	P12
Cdh20	4.51048e-29	0.394101	0.646	0.618	1.62779e-24	S2	P12
Lingo2	7.11961e-29	0.289779	0.995	0.993	2.5694e-24	S2	P12
Syne1	1.41404e-28	0.326675	0.848	0.847	5.10314e-24	S2	P12
Arid1b	1.48786e-27	0.268459	0.847	0.865	5.36953e-23	S2	P12
Gramd1b	8.60787e-27	0.264326	0.841	0.857	3.1065e-22	S2	P12
Robo1	9.90806e-27	0.269573	0.982	0.986	3.57572e-22	S2	P12
Pnn	1.11893e-26	0.253214	0.705	0.73	4.03812e-22	S2	P12
Lpp	1.84572e-26	0.259569	0.574	0.585	6.66103e-22	S2	P12
Slit2	2.08653e-26	0.28158	0.849	0.862	7.5301e-22	S2	P12
Frmd5	4.90483e-26	0.351329	0.964	0.961	1.7701e-21	S2	P12
Farp1	1.5136e-25	0.256663	0.915	0.93	5.46243e-21	S2	P12
Rasgef1b	1.60784e-25	0.48914	0.485	0.35	5.80252e-21	S2	P12
Mia2	2.92692e-24	0.376565	0.359	0.261	1.0563e-19	S2	P12
Klf12	5.72907e-24	0.299351	0.641	0.625	2.06756e-19	S2	P12
Acp1	1.39586e-23	0.324807	0.312	0.231	5.03753e-19	S2	P12
Kctd16	4.29659e-23	0.318392	0.76	0.75	1.5506e-18	S2	P12
Ppp1r14c	5.88092e-23	0.310356	0.401	0.359	2.12236e-18	S2	P12
Specc1	6.37563e-23	0.283334	0.553	0.567	2.3009e-18	S2	P12
Trim35	1.44516e-22	0.261717	0.538	0.536	5.21544e-18	S2	P12
Edil3	1.46949e-22	0.276103	0.651	0.66	5.30326e-18	S2	P12
Luzp2	2.397e-22	0.322083	0.598	0.591	8.65055e-18	S2	P12
Srrm2	4.46558e-22	0.297235	0.99	0.991	1.61158e-17	S2	P12
Sh3pxd2a	4.51263e-22	0.343242	0.315	0.246	1.62856e-17	S2	P12
Shisa9	8.92233e-22	0.274318	0.743	0.794	3.21998e-17	S2	P12
Nfia	1.5096e-21	0.307883	0.735	0.728	5.448e-17	S2	P12
Fam19a5	2.30016e-21	0.265556	0.516	0.52	8.30104e-17	S2	P12
Ajap1	3.94196e-21	0.280631	0.361	0.319	1.42261e-16	S2	P12
Nell1	6.25437e-21	0.387661	0.673	0.653	2.25714e-16	S2	P12
Tcf25	1.39735e-20	0.38085	0.651	0.518	5.04288e-16	S2	P12
Ptprk	3.22428e-20	0.398754	0.562	0.607	1.16361e-15	S2	P12
Kansl1l	1.02203e-19	0.263277	0.412	0.401	3.6884e-15	S2	P12
Rgs6	2.00062e-19	0.304789	0.885	0.828	7.22005e-15	S2	P12
Nsd3	3.34113e-19	0.363238	0.588	0.472	1.20578e-14	S2	P12
Mctp2	3.6469e-19	0.270548	0.271	0.244	1.31613e-14	S2	P12
Gm5149	4.32475e-19	0.280571	0.166	0.083	1.56076e-14	S2	P12
Lama2	4.38215e-19	0.335945	0.115	0.048	1.58147e-14	S2	P12
C78859	6.25053e-19	0.305046	0.372	0.302	2.25575e-14	S2	P12
Gm26906	1.49904e-18	0.26177	0.369	0.33	5.40989e-14	S2	P12
Gm16083	3.35441e-18	0.28074	0.438	0.412	1.21057e-13	S2	P12
Plcl1	1.28257e-17	0.345952	0.323	0.294	4.62867e-13	S2	P12
Kcnk9	2.38967e-17	0.287982	0.262	0.207	8.62407e-13	S2	P12
Hcn1	7.0955e-17	0.25142	0.965	0.968	2.5607e-12	S2	P12
Dgkg	1.00561e-16	0.335428	0.333	0.265	3.62914e-12	S2	P12
Nhsl2	2.86753e-16	0.274887	0.226	0.156	1.03486e-11	S2	P12
Nrsn1	5.10603e-16	0.294591	0.29	0.214	1.84272e-11	S2	P12
Pcgf5	8.83734e-16	0.256455	0.495	0.473	3.18931e-11	S2	P12
Bcl2	1.55507e-15	0.254731	0.306	0.272	5.61208e-11	S2	P12
Ptn	1.56447e-15	0.26696	0.339	0.29	5.64601e-11	S2	P12
AC149090.1	5.44381e-15	0.334067	0.306	0.252	1.96462e-10	S2	P12
Cachd1	2.1289e-14	0.254916	0.134	0.072	7.68299e-10	S2	P12
Slf2	8.41572e-14	0.269322	0.394	0.338	3.03715e-09	S2	P12
Fstl4	1.08084e-13	0.352516	0.477	0.427	3.90063e-09	S2	P12
Thsd7a	1.76287e-13	0.279721	0.282	0.2	6.36203e-09	S2	P12
Igf2bp2	1.78002e-13	0.259802	0.317	0.257	6.42391e-09	S2	P12
Ccbe1	3.62174e-13	0.2962	0.265	0.188	1.30705e-08	S2	P12
Col26a1	3.35483e-10	0.303247	0.143	0.082	1.21073e-05	S2	P12
Creb5	4.6482e-10	0.264037	0.167	0.124	1.67749e-05	S2	P12
Col6a1	6.54921e-10	0.259796	0.164	0.12	2.36354e-05	S2	P12
Xist	4.74193e-09	0.286212	0.6	0.519	0.000171132	S2	P12
Cdh4	8.23502e-09	0.290667	0.439	0.41	0.000297194	S2	P12
Tenm3	0	2.02587	0.93	0.662	0	Vis	P12
Tenm2	0	1.42309	1	0.973	0	Vis	P12
Reln	3.21959e-293	1.59572	0.878	0.534	1.16192e-288	Vis	P12
5730522E02Rik	5.16716e-226	1.06539	0.973	0.866	1.86478e-221	Vis	P12
Cpne4	8.54776e-222	1.31606	0.536	0.129	3.0848e-217	Vis	P12
Cntn3	7.02733e-206	0.915995	0.983	0.896	2.53609e-201	Vis	P12
Adamtsl1	8.84665e-202	1.47271	0.464	0.14	3.19267e-197	Vis	P12
Ncald	1.64763e-176	1.35419	0.583	0.261	5.94614e-172	Vis	P12
Galnt17	5.25139e-172	1.11169	0.779	0.31	1.89518e-167	Vis	P12
Kcnab1	9.49548e-171	1.31775	0.685	0.328	3.42682e-166	Vis	P12
Utrn	1.46821e-163	1.03753	0.832	0.631	5.29863e-159	Vis	P12
Cntn6	2.64938e-162	0.919125	0.976	0.826	9.56133e-158	Vis	P12
Egfem1	6.49335e-161	1.57422	0.73	0.309	2.34338e-156	Vis	P12
Dcc	5.20695e-158	2.05142	0.532	0.32	1.87914e-153	Vis	P12
Cntn5	1.70165e-155	0.847787	0.979	0.907	6.14109e-151	Vis	P12
4930587E11Rik	2.51583e-151	0.976418	0.549	0.158	9.07937e-147	Vis	P12
Tmtc2	3.6946e-147	1.31397	0.785	0.647	1.33334e-142	Vis	P12
Runx1t1	1.11207e-141	0.904942	0.734	0.465	4.01334e-137	Vis	P12
Fn1	6.35819e-141	1.14791	0.327	0.04	2.29461e-136	Vis	P12
Sorcs1	1.24354e-140	1.32342	0.945	0.922	4.48781e-136	Vis	P12
Dlg2	9.24207e-136	0.409461	1	0.692	3.33537e-131	Vis	P12
Tshz3	5.76028e-135	0.87535	0.765	0.467	2.07883e-130	Vis	P12
Stac	3.92474e-129	0.938434	0.395	0.101	1.4164e-124	Vis	P12
Galntl6	4.69067e-123	0.77561	0.993	0.966	1.69281e-118	Vis	P12
Spock3	1.40761e-119	1.07441	0.419	0.171	5.07993e-115	Vis	P12
Tcf12	5.92875e-119	0.822244	0.772	0.585	2.13963e-114	Vis	P12
Vwc2l	1.76665e-115	1.44143	0.437	0.155	6.37565e-111	Vis	P12
Bcl11a	3.34147e-115	0.76696	0.898	0.683	1.2059e-110	Vis	P12
Kcnb2	9.47474e-115	0.819091	0.982	0.938	3.41934e-110	Vis	P12
Unc5d	1.31208e-112	1.08642	0.527	0.314	4.73518e-108	Vis	P12
Cdh8	1.5533e-112	0.753905	0.966	0.866	5.60571e-108	Vis	P12
Gm49171	1.4502e-110	0.892879	0.277	0.044	5.23364e-106	Vis	P12
Rxfp1	5.65694e-109	0.857536	0.561	0.257	2.04153e-104	Vis	P12
Galnt14	7.17526e-107	0.830116	0.785	0.561	2.58948e-102	Vis	P12
Fgf12	2.98279e-102	0.535137	0.997	0.985	1.07646e-97	Vis	P12
Htr2a	1.81132e-99	0.862869	0.444	0.235	6.53687e-95	Vis	P12
Erg	6.65458e-99	0.707961	0.319	0.062	2.40157e-94	Vis	P12
AC129186.1	1.15081e-96	0.71144	0.876	0.543	4.15316e-92	Vis	P12
Rora	1.21338e-91	1.11519	0.924	0.891	4.37896e-87	Vis	P12
Cadm1	6.54834e-90	0.671833	0.927	0.841	2.36323e-85	Vis	P12
Gm26905	4.17901e-88	0.771475	0.611	0.385	1.50816e-83	Vis	P12
Gm20754	2.39901e-87	0.641661	0.957	0.914	8.65777e-83	Vis	P12
Ehbp1	4.5732e-87	0.731511	0.904	0.846	1.65042e-82	Vis	P12
2001-03-01	2.76921e-86	0.711513	0.887	0.795	9.99381e-82	Vis	P12
A330015K06Rik	8.49768e-86	0.655764	0.327	0.105	3.06673e-81	Vis	P12
Hs6st3	1.76476e-84	0.503413	0.998	0.986	6.36886e-80	Vis	P12
Tcf25	7.77573e-83	0.424931	0.821	0.497	2.80618e-78	Vis	P12
Nrg1	6.82853e-80	0.805333	0.988	0.971	2.46435e-75	Vis	P12
A230057D06Rik	1.32723e-79	0.437439	0.874	0.569	4.78983e-75	Vis	P12
Csmd1	5.20684e-77	0.399542	1	1	1.8791e-72	Vis	P12
Samd5	4.49618e-76	0.814285	0.391	0.183	1.62263e-71	Vis	P12
Lrrn3	4.19612e-73	0.661619	0.373	0.173	1.51434e-68	Vis	P12
Nsd3	3.68247e-71	0.446298	0.759	0.45	1.32897e-66	Vis	P12
Pak7	1.8714e-70	0.621609	0.797	0.734	6.7537e-66	Vis	P12
Ust	1.30077e-67	0.704065	0.684	0.566	4.69433e-63	Vis	P12
Hectd4	1.11579e-66	0.511963	0.745	0.442	4.02679e-62	Vis	P12
Cpne7	4.43548e-66	0.414684	0.188	0.028	1.60072e-61	Vis	P12
Spats2l	3.0747e-63	0.522416	0.293	0.088	1.10963e-58	Vis	P12
Fam19a1	1.59593e-62	0.338306	1	0.999	5.75955e-58	Vis	P12
Grin3a	7.04696e-62	0.955574	0.489	0.328	2.54318e-57	Vis	P12
Cacna1c	8.54717e-61	0.465941	0.96	0.912	3.08459e-56	Vis	P12
Wdpcp	9.73347e-61	0.582928	0.528	0.422	3.51271e-56	Vis	P12
Mctp1	2.17635e-60	0.592622	0.807	0.697	7.85423e-56	Vis	P12
Car10	7.52445e-60	0.7811	0.378	0.273	2.7155e-55	Vis	P12
Slf2	1.29567e-59	0.447225	0.595	0.313	4.67595e-55	Vis	P12
Dab1	2.10688e-59	0.273776	1	0.999	7.60352e-55	Vis	P12
C130073E24Rik	3.14256e-58	0.351563	0.106	0.011	1.13412e-53	Vis	P12
AY036118	2.66799e-56	0.387994	0.711	0.436	9.6285e-52	Vis	P12
Unc13b	1.00924e-55	0.532805	0.806	0.705	3.64223e-51	Vis	P12
Macrod2	1.19016e-55	0.397263	0.998	0.994	4.29518e-51	Vis	P12
Cwc22	1.22737e-55	0.571021	0.8	0.687	4.42947e-51	Vis	P12
Csgalnact1	2.02813e-55	0.528247	0.626	0.47	7.31933e-51	Vis	P12
Adcy8	3.5602e-54	0.537286	0.849	0.693	1.28484e-49	Vis	P12
Tsix	7.19571e-54	0.498098	0.279	0.093	2.59686e-49	Vis	P12
Rtl4	2.81191e-52	0.662977	0.577	0.321	1.01479e-47	Vis	P12
4930509J09Rik	3.04352e-52	0.557204	0.554	0.409	1.09838e-47	Vis	P12
Tiam1	8.81505e-52	0.522926	0.713	0.548	3.18126e-47	Vis	P12
Ttc28	8.85424e-51	0.646028	0.512	0.364	3.19541e-46	Vis	P12
Pdzd2	4.09493e-50	0.455595	0.944	0.897	1.47782e-45	Vis	P12
Adgrb3	8.02188e-50	0.315737	0.999	0.995	2.89502e-45	Vis	P12
Gm47283	2.1179e-49	0.429056	0.604	0.345	7.6433e-45	Vis	P12
Rarb	2.12743e-49	0.596175	0.421	0.261	7.67767e-45	Vis	P12
Trank1	4.61338e-49	0.567279	0.605	0.386	1.66492e-44	Vis	P12
Plxna2	4.71877e-49	0.490224	0.816	0.812	1.70296e-44	Vis	P12
Asic2	4.73897e-49	0.388557	1	0.997	1.71025e-44	Vis	P12
Npnt	1.10903e-48	0.591022	0.471	0.254	4.00238e-44	Vis	P12
Tanc2	2.5612e-48	0.344679	0.979	0.965	9.24312e-44	Vis	P12
Lgr4	7.97898e-48	0.523757	0.4	0.267	2.87953e-43	Vis	P12
Syn3	9.72181e-48	0.526033	0.674	0.539	3.5085e-43	Vis	P12
Gm48749	3.23673e-47	0.283111	0.147	0.025	1.1681e-42	Vis	P12
Pbx3	1.69281e-46	0.563565	0.539	0.47	6.10917e-42	Vis	P12
Chl1	2.05045e-46	0.47925	0.806	0.69	7.39988e-42	Vis	P12
Bicc1	1.02053e-45	0.518016	0.265	0.19	3.683e-41	Vis	P12
Cdh2	1.79162e-45	0.463221	0.783	0.705	6.46577e-41	Vis	P12
[truncated: 1,452 more rows]
