# Supplementary material for: Developmental molecular controls over arealization of descending cortical motor pathways
Source: Research Square preprint supplement (doi:10.21203/rs.3.rs-3166328/v1), 2023-07-24
Supplement: Supplementary file 2 [file 66ab26568eb31b7676ddf16c.xlsx]

## Sheet: coreTimeandSpace-genesCal2022_v
Number	Pseudotime	Space_MO-SSp-VISp	Space_MO-SSp-SSs	Space_VISp-SSp-SSs
1	Kcnb2	Pantr1	Adgrb3	Xkr4
2	Fn1	Sphkap	Cdh20	Cntnap5a
3	Glb1l	Cdh20	Cdh7	Gm16083
4	R3hdm1	Cntnap5a	Cntnap5a	Tnr
5	Nos1ap	Gm28928	Lypd1	Gpr158
6	Nvl	Brinp3	Pbx1	Mrpl41
7	Nebl	Tnr	Ntng2	Zeb2
8	Zfp385b	Pbx3	Pde1a	Pde1a
9	Cwc22	Zeb2	Itgav	Lrrc4c
10	Pde1a	Slc1a2	Lrrc4c	Ano3
11	Fmn1	Rin2	Slc1a2	Snhg11
12	Sema6d	Egfem1	Ano3	Mir124-2hg
13	Egfem1	Kcnmb2	Ryr3	Egfem1
14	Gm20754	Lhfp	Meis2	Gm37459
15	Tspan5	Kcnab1	Sema6d	Pex5l
16	Adgrl2	A330015K06Rik	Slc24a3	4930419G24Rik
17	Gm30382	Unc5c	Mir124-2hg	Kcnab1
18	Bach2	Adgrl2	Cyp7b1	A330015K06Rik
19	Plppr1	Gm30382	Egfem1	Pdgfc
20	Zfp804b	Epha7	Pex5l	Unc5c
21	Ldb2	Astn2	4930419G24Rik	Bmpr1b
22	Kcnip4	Ccdc171	Lhfp	Gm30382
23	C530008M17Rik	Adamtsl1	Fstl5	Negr1
24	Cux2	Mllt3	Pdgfc	Zranb2
25	Tmem132b	Nfia	Bmpr1b	Tox
26	Auts2	Reln	St6galnac5	Runx1t1
27	Lncpint	Kcnip4	St6galnac3	Bach2
28	Plxna4	Pcdh7	Negr1	Lingo2
29	Lrrtm4	Fras1	Zranb2	Adamtsl1
30	Iqsec1	Rph3a	Runx1t1	Slc24a2
31	Chl1	Plxna4	Nkain3	Pabpc4
32	Cntn4	Grid2	Bach2	Stmn1
33	Grm7	Fam19a1	Lingo2	Chd5
34	Atp2b2	Cntn3	Ccdc171	Sema3e
35	Cacna1c	Cntn6	Nfia	Kcnip4
36	Ptpro	Sox5	Cachd1	Epha5
37	Usp29	Sox5os4	Raver2	Fras1
38	Gipr	Tshz3	Pabpc4	Thsd7a
39	Nav2	Nell1	Srsf10	Gm15594
40	Nell1	Mctp2	Zfp804b	Plxna4
41	Fam189a1	Hbb-bs	Reln	Grid2
42	Mical2	Hs3st4	Gabrb1	Fam19a1
43	Prkcb	6430573F11Rik	Rph3a	Pdzrn3
44	Myo16	Tenm3	Auts2	Zfp329
45	Dlgap2	Galntl6	Gm15594	Nell1
46	Nrg1	Gm26905	Grid2	Luzp2
47	Galntl6	Tox3	Pdzrn3	Mctp2
48	March1	Dpy19l1	Cntn6	Tcerg1l
49	Ntm	Opcml	Gm44511	Unc5d
50	Dscaml1	Unc13c	Sox5	Sgcz
51	Ncam1	Clstn2	Luzp2	Tenm3
52	Scaper	Stac	Dlg2	Galntl6
53	Neo1	9530059O14Rik	Tcerg1l	Cdh8
54	Rora	Utrn	Nrg1	Cdh11
55	Rasgrf1	Ptprk	Sgcz	Adamts18
56	Tmem108	Ctnna3	Tenm3	Cntn5
57	9530059O14Rik	Lrrtm3	Cdh8	Ntm
58	Syt1	Pcdh15	Cdh11	Stac
59	Grip1	Gm16105	Adamts18	Ust
60	Srgap1	Socs2	Nrp1	Slc35f1
61	Kcnip1	Mgat4c	Cntn5	Pcdh15
62	Slit3	Fam19a2	Maml2	Fam19a2
63	Asic2	Bcl11a	Dpy19l1	Bcl11a
64	Car10	5730522E02Rik	Opcml	Tenm2
65	Pitpnc1	Vrk2	Clstn2	Fndc9
66	Cep112	Slit3	Slc35f1	Fstl4
67	Stxbp6	Fndc9	Lrrtm3	Chd3
68	Nrxn3	Taco1	Pcdh15	A830036E02Rik
69	Kcnk10	Pitpnc1	Fam19a2	Taco1
70	Ptprn2	Prkca	Bcl11a	Prkca
71	Rapgef5	Cep112	5730522E02Rik	Acp1
72	Pfkp	Prkd1	Tenm2	Hdac9
73	Phactr1	4930447C04Rik	Fstl4	Spock1
74	Cap2	Spock1	Spag5	Lrtm1
75	Vcan	Edil3	Pitpnc1	Mir124a-1hg
76	Map1b	Diaph3	Cep112	Trim35
77	Mast4	Pcdh9	4930447C04Rik	Pcdh9
78	Pde4d	Klhl1	Pou6f2	Mycbp2
79	Hcn1	Gpc5	Edil3	Nell2
80	Thrb	Hs6st3	Plk2	Rbfox1
81	Erc2	Cdh6	Diaph3	Cmss1
82	Gpc6	Cdh10	Gpc5	Robo1
83	Oxr1	Zfpm2	Hs6st3	Dynlt1a
84	Csmd3	Dgkg	Cdh6	Gm26848
85	Fam135b	Il1rap	Fam135b	Gm42418
86	Pdzrn4	Lsamp	Scube1	Cntnap5c
87	Grin2a	Col8a1	Rbfox1	Efna5
88	Kalrn	Epha6	Igf2bp2	Ptprm
89	Tiam2	Cadm2	Lsamp	Dcc
90	Camk2a	Robo1	Epha6	Malat1
91	Dcc	Erg	Cadm2	Tenm1
92	Rorb	Dynlt1a	Zdhhc14	C230004F18Rik
93	Trpm3	Gm26848	Gm42418	Aff2
94	Apba1	Runx2	Runx2	Dmd
95	Sorcs1	Galnt14	Efna5	Tmsb4x
96	Gria3	Mkx	Zfp608	A230057D06Rik
97	Dmd	Malat1	Dmd	Smpd3
98	Rasgef1b	Sorcs3	Gm36251	Gm36251
99	Galnt17	Sorcs1	AC129186.1	AY036118
100	AC149090.1	4930587E11Rik	AY036118	Gm47283
	Bold text: 12 genes common between pseuotime and pseudospace MO-SSp-VISp model
