# Supplementary material for: Developmental molecular controls over arealization of descending cortical motor pathways
Source: Research Square preprint supplement (doi:10.21203/rs.3.rs-3166328/v1), 2023-07-24
Supplement: Supplementary file 3 [file 8499cf64804235453f6849fa.xlsx]

## Sheet: DEGT18type_singleAge_MAST_31012
gene	p_val	avg_log2FC	pct.1	pct.2	p_val_adj	cluster	age
St6galnac5	0	2.22465	0.708	0.367	0	L5 PT ALM Slco2a1	P08
Gm26871	0	1.48619	0.639	0.258	0	L5 PT ALM Slco2a1	P08
A930011G23Rik	0	1.35475	0.598	0.212	0	L5 PT ALM Slco2a1	P08
Astn2	0	1.33056	0.933	0.767	0	L5 PT ALM Slco2a1	P08
Dlg2.1	0	1.21134	0.644	0.262	0	L5 PT ALM Slco2a1	P08
9330162G02Rik	0	1.20183	0.639	0.258	0	L5 PT ALM Slco2a1	P08
St6galnac3	0	1.15249	0.887	0.756	0	L5 PT ALM Slco2a1	P08
Pigk	0	1.14613	0.666	0.455	0	L5 PT ALM Slco2a1	P08
Rian	0	1.13892	0.641	0.26	0	L5 PT ALM Slco2a1	P08
Nfia	0	1.13803	0.886	0.586	0	L5 PT ALM Slco2a1	P08
Snhg14	0	1.11511	0.638	0.259	0	L5 PT ALM Slco2a1	P08
Zfp804b	0	1.04913	0.671	0.424	0	L5 PT ALM Slco2a1	P08
Trerf1	0	0.921108	0.562	0.219	0	L5 PT ALM Slco2a1	P08
Gm38073	0	0.901979	0.56	0.213	0	L5 PT ALM Slco2a1	P08
Slc35f1	0	0.863525	0.859	0.73	0	L5 PT ALM Slco2a1	P08
Airn	0	0.852937	0.673	0.44	0	L5 PT ALM Slco2a1	P08
Cdh13	0	0.839438	0.991	0.884	0	L5 PT ALM Slco2a1	P08
Gm44560	0	0.819541	0.565	0.226	0	L5 PT ALM Slco2a1	P08
Gm17167	0	0.808758	0.549	0.223	0	L5 PT ALM Slco2a1	P08
2610203C20Rik	0	0.74184	0.566	0.235	0	L5 PT ALM Slco2a1	P08
Lrrc4c	0	0.71691	0.989	0.979	0	L5 PT ALM Slco2a1	P08
Igsf21	0	0.71676	0.94	0.829	0	L5 PT ALM Slco2a1	P08
Gm15800	0	0.710308	0.522	0.216	0	L5 PT ALM Slco2a1	P08
Cdh6	0	0.649951	0.866	0.672	0	L5 PT ALM Slco2a1	P08
Neto1	0	0.609042	0.851	0.767	0	L5 PT ALM Slco2a1	P08
Brinp1	0	0.591253	0.974	0.945	0	L5 PT ALM Slco2a1	P08
Dok6	0	0.583321	0.934	0.862	0	L5 PT ALM Slco2a1	P08
Cacnb4	0	0.57646	0.98	0.957	0	L5 PT ALM Slco2a1	P08
Opcml	0	0.536032	0.999	0.999	0	L5 PT ALM Slco2a1	P08
Nfib	0	0.525351	0.985	0.972	0	L5 PT ALM Slco2a1	P08
Fam135b	0	0.523218	0.893	0.842	0	L5 PT ALM Slco2a1	P08
Cacna1e	0	0.508077	0.979	0.958	0	L5 PT ALM Slco2a1	P08
Gm27247	0	0.481125	0.531	0.238	0	L5 PT ALM Slco2a1	P08
Gm28928	0	0.471395	0.999	0.997	0	L5 PT ALM Slco2a1	P08
Pex5l	0	0.464045	0.999	0.994	0	L5 PT ALM Slco2a1	P08
Pcdh7	0	0.459346	0.991	0.977	0	L5 PT ALM Slco2a1	P08
A330076H08Rik	1.03753785626662e-322	0.611119	0.522	0.223	3.7443703694806e-318	L5 PT ALM Slco2a1	P08
Kcnip4	1.75640337096563e-320	0.523434	1	1	6.33868412547787e-316	L5 PT ALM Slco2a1	P08
Mpped2	4.15331344519985e-319	0.554368	0.894	0.805	1.49888928923818e-314	L5 PT ALM Slco2a1	P08
Plxna4	4.97172970437308e-315	0.509519	0.943	0.886	1.7942475330112e-310	L5 PT ALM Slco2a1	P08
Zcchc16	1.7369857619431e-313	0.780158	0.479	0.191	0	L5 PT ALM Slco2a1	P08
Mir99ahg	2.02342e-306	0.650742	0.498	0.208	7.3023e-302	L5 PT ALM Slco2a1	P08
Grid2	5.74145e-303	0.441199	0.996	0.984	2.07203e-298	L5 PT ALM Slco2a1	P08
Rorb	7.56327e-298	0.787828	0.64	0.407	2.72951e-293	L5 PT ALM Slco2a1	P08
Sgcz	4.34607e-293	0.488109	0.995	0.993	1.56845e-288	L5 PT ALM Slco2a1	P08
Gm12394	2.82716e-291	0.678582	0.49	0.209	1.02029e-286	L5 PT ALM Slco2a1	P08
Dpyd	9.29058e-287	0.647376	0.697	0.502	3.35288e-282	L5 PT ALM Slco2a1	P08
Msra	1.05445e-284	0.478296	0.95	0.916	3.80539e-280	L5 PT ALM Slco2a1	P08
Gm37899	1.01638e-280	0.58979	0.455	0.184	3.668e-276	L5 PT ALM Slco2a1	P08
Whsc1l1	1.78562e-276	0.604599	0.464	0.194	6.44411e-272	L5 PT ALM Slco2a1	P08
Rit2	1.67018e-275	0.549016	0.821	0.714	6.02753e-271	L5 PT ALM Slco2a1	P08
C77370	3.29383e-275	0.618251	0.432	0.171	1.18871e-270	L5 PT ALM Slco2a1	P08
A230103L15Rik	2.22168e-271	0.593388	0.459	0.192	8.01781e-267	L5 PT ALM Slco2a1	P08
Gm1043	9.97385e-271	0.582565	0.451	0.186	3.59946e-266	L5 PT ALM Slco2a1	P08
Gm2163	1.10222e-269	0.617863	0.449	0.185	3.97782e-265	L5 PT ALM Slco2a1	P08
Zswim6	9.83409e-268	0.608251	0.47	0.202	3.54902e-263	L5 PT ALM Slco2a1	P08
Grid1	1.92915e-267	0.476102	0.907	0.84	6.96211e-263	L5 PT ALM Slco2a1	P08
Gm44562	1.17013e-262	0.566735	0.436	0.178	4.22287e-258	L5 PT ALM Slco2a1	P08
Kcnip1	2.21019e-260	0.63752	0.439	0.24	7.97637e-256	L5 PT ALM Slco2a1	P08
Prr16	1.14771e-255	0.520341	0.899	0.844	4.14197e-251	L5 PT ALM Slco2a1	P08
Gm4258	9.42824e-254	0.50458	0.453	0.197	3.40256e-249	L5 PT ALM Slco2a1	P08
Rimbp2	2.98669e-253	0.455754	0.902	0.846	1.07787e-248	L5 PT ALM Slco2a1	P08
Nckap5	8.51206e-252	0.602952	0.705	0.557	3.07192e-247	L5 PT ALM Slco2a1	P08
Tmem181b-ps	7.25127e-244	0.527367	0.396	0.156	2.61691e-239	L5 PT ALM Slco2a1	P08
RP24-274B19.1	1.39408e-241	0.498994	0.44	0.191	5.03111e-237	L5 PT ALM Slco2a1	P08
Fras1	9.15888e-241	0.567703	0.699	0.585	3.30535e-236	L5 PT ALM Slco2a1	P08
Ppm1l	1.29638e-233	0.44733	0.862	0.785	4.67852e-229	L5 PT ALM Slco2a1	P08
Dlgap1	1.99495e-229	0.272857	0.999	0.999	7.19958e-225	L5 PT ALM Slco2a1	P08
Diaph2	5.64526e-228	0.458086	0.847	0.771	2.03732e-223	L5 PT ALM Slco2a1	P08
Grik4	7.30512e-228	0.553166	0.584	0.375	2.63634e-223	L5 PT ALM Slco2a1	P08
A330023F24Rik	3.03368e-220	0.486419	0.397	0.166	1.09483e-215	L5 PT ALM Slco2a1	P08
Whsc1	6.62815e-219	0.486704	0.396	0.166	2.39203e-214	L5 PT ALM Slco2a1	P08
B3galt1	3.01257e-216	0.404522	0.947	0.899	1.08721e-211	L5 PT ALM Slco2a1	P08
Far2	3.44789e-211	0.44385	0.766	0.672	1.24431e-206	L5 PT ALM Slco2a1	P08
Ccdc171	1.0517e-209	0.48253	0.393	0.208	3.79547e-205	L5 PT ALM Slco2a1	P08
Ccdc64	1.77547e-207	0.436065	0.397	0.172	6.40751e-203	L5 PT ALM Slco2a1	P08
Dscaml1	2.76257e-203	0.423807	0.937	0.874	9.96983e-199	L5 PT ALM Slco2a1	P08
Sv2b	3.9439e-202	0.380605	0.871	0.832	1.42331e-197	L5 PT ALM Slco2a1	P08
Cntn4	1.07572e-201	0.612322	0.923	0.854	3.88216e-197	L5 PT ALM Slco2a1	P08
Crym	9.79787e-198	0.45759	0.46	0.264	3.53595e-193	L5 PT ALM Slco2a1	P08
Tiam2	4.19381e-192	0.464607	0.8	0.72	1.51351e-187	L5 PT ALM Slco2a1	P08
Pid1	4.34897e-190	0.430078	0.872	0.794	1.5695e-185	L5 PT ALM Slco2a1	P08
D930015E06Rik	2.55966e-189	0.450909	0.354	0.148	9.23756e-185	L5 PT ALM Slco2a1	P08
Cntnap5c	2.98484e-188	0.497309	0.685	0.527	1.0772e-183	L5 PT ALM Slco2a1	P08
Gm44559	1.09527e-187	0.429587	0.351	0.146	3.95272e-183	L5 PT ALM Slco2a1	P08
Slc44a5	1.6758e-185	0.495628	0.393	0.233	6.0478e-181	L5 PT ALM Slco2a1	P08
Hs6st3	2.1623e-185	0.398001	0.985	0.982	7.80352e-181	L5 PT ALM Slco2a1	P08
Erdr1	8.16584e-184	0.426001	0.342	0.142	2.94697e-179	L5 PT ALM Slco2a1	P08
Cntn1	1.38286e-183	0.340287	0.98	0.968	4.9906e-179	L5 PT ALM Slco2a1	P08
Kcnq3	9.91089e-178	0.325244	0.99	0.982	3.57674e-173	L5 PT ALM Slco2a1	P08
RP23-54G8.4	9.5688e-175	0.390167	0.349	0.151	3.45329e-170	L5 PT ALM Slco2a1	P08
Gucy1b3	1.06823e-174	0.413092	0.372	0.168	3.85514e-170	L5 PT ALM Slco2a1	P08
RP24-349L11.1	8.30102e-173	0.422902	0.325	0.134	2.99575e-168	L5 PT ALM Slco2a1	P08
Bre	4.50378e-171	0.416141	0.327	0.136	1.62537e-166	L5 PT ALM Slco2a1	P08
1500004A13Rik	4.8952e-171	0.409462	0.316	0.128	1.76663e-166	L5 PT ALM Slco2a1	P08
Syt17	5.28606e-169	0.332038	0.27	0.103	1.90769e-164	L5 PT ALM Slco2a1	P08
Prickle2	1.90552e-168	0.323835	0.976	0.932	6.87685e-164	L5 PT ALM Slco2a1	P08
Spag5	4.32913e-166	0.461236	0.333	0.144	1.56234e-161	L5 PT ALM Slco2a1	P08
Xylt1	1.59489e-165	0.31676	0.928	0.812	5.7558e-161	L5 PT ALM Slco2a1	P08
Htr1f	3.01028e-164	0.548411	0.751	0.603	1.08638e-159	L5 PT ALM Slco2a1	P08
Kcnh1	1.87663e-163	0.454978	0.513	0.336	6.77256e-159	L5 PT ALM Slco2a1	P08
Gbas	5.87218e-163	0.355723	0.27	0.101	2.11921e-158	L5 PT ALM Slco2a1	P08
Hdgfrp3	4.66892e-162	0.356783	0.302	0.122	1.68497e-157	L5 PT ALM Slco2a1	P08
Dpp10	3.95847e-158	0.254896	0.994	0.991	1.42857e-153	L5 PT ALM Slco2a1	P08
Fam178a	1.16625e-157	0.354366	0.308	0.128	4.20889e-153	L5 PT ALM Slco2a1	P08
Sntg2	9.45164e-155	0.350326	0.282	0.124	3.411e-150	L5 PT ALM Slco2a1	P08
Stk39	6.66898e-154	0.339013	0.911	0.89	2.40677e-149	L5 PT ALM Slco2a1	P08
RP23-331E5.5	1.49807e-153	0.351807	0.318	0.138	5.40639e-149	L5 PT ALM Slco2a1	P08
Csmd2	1.87931e-149	0.25436	0.99	0.988	6.78223e-145	L5 PT ALM Slco2a1	P08
Lsamp	3.9939e-149	0.950162	0.975	0.965	1.44136e-144	L5 PT ALM Slco2a1	P08
Nin	4.653e-149	0.322649	0.894	0.858	1.67922e-144	L5 PT ALM Slco2a1	P08
Cntnap5b	1.1211e-147	0.486936	0.801	0.714	4.04592e-143	L5 PT ALM Slco2a1	P08
Dfna5	1.34031e-147	0.366698	0.3	0.128	4.83703e-143	L5 PT ALM Slco2a1	P08
Kcnq1	1.46902e-146	0.377747	0.323	0.15	5.30155e-142	L5 PT ALM Slco2a1	P08
Rfwd2	6.62128e-146	0.347715	0.304	0.132	2.38955e-141	L5 PT ALM Slco2a1	P08
Rn18s-rs5	1.55046e-145	0.335602	0.307	0.134	5.59546e-141	L5 PT ALM Slco2a1	P08
Slmo1	1.63728e-145	0.336103	0.28	0.115	5.90879e-141	L5 PT ALM Slco2a1	P08
Ptpre	2.40434e-145	0.363855	0.727	0.633	8.67703e-141	L5 PT ALM Slco2a1	P08
Lypd1	8.03604e-144	0.370925	0.3	0.132	2.90012e-139	L5 PT ALM Slco2a1	P08
Fam63b	1.06805e-143	0.332266	0.269	0.108	3.85448e-139	L5 PT ALM Slco2a1	P08
Crim1	2.57456e-143	0.41988	0.653	0.572	9.29134e-139	L5 PT ALM Slco2a1	P08
1700123O21Rik	1.37105e-142	0.337489	0.315	0.141	4.94797e-138	L5 PT ALM Slco2a1	P08
6820431F20Rik	1.3739e-142	0.318053	0.282	0.117	4.95826e-138	L5 PT ALM Slco2a1	P08
Greb1l	4.48295e-142	0.406491	0.406	0.248	1.61785e-137	L5 PT ALM Slco2a1	P08
Pcsk5	9.22885e-140	0.358358	0.822	0.781	3.3306e-135	L5 PT ALM Slco2a1	P08
Nmnat2	1.14688e-139	0.345179	0.864	0.823	4.13897e-135	L5 PT ALM Slco2a1	P08
Bzrap1	1.91455e-139	0.323615	0.267	0.108	6.90941e-135	L5 PT ALM Slco2a1	P08
2610307P16Rik	3.14129e-137	0.355215	0.197	0.064	1.13366e-132	L5 PT ALM Slco2a1	P08
Prkca	3.91666e-137	0.360099	0.876	0.829	1.41348e-132	L5 PT ALM Slco2a1	P08
2610005L07Rik	8.84711e-137	0.309296	0.271	0.113	3.19284e-132	L5 PT ALM Slco2a1	P08
L3mbtl4	2.53727e-136	0.434663	0.804	0.783	9.15676e-132	L5 PT ALM Slco2a1	P08
Apba1	7.35014e-135	0.307278	0.977	0.961	2.65259e-130	L5 PT ALM Slco2a1	P08
Ephb1	5.63866e-134	0.352951	0.889	0.834	2.03494e-129	L5 PT ALM Slco2a1	P08
Enox1	6.02517e-134	0.341074	0.949	0.942	2.17442e-129	L5 PT ALM Slco2a1	P08
Slit3	1.12737e-132	0.375205	0.899	0.823	4.06856e-128	L5 PT ALM Slco2a1	P08
A230077H06Rik	3.016e-132	0.25211	0.227	0.084	1.08844e-127	L5 PT ALM Slco2a1	P08
Fam134b	1.14491e-130	0.323925	0.285	0.125	4.13188e-126	L5 PT ALM Slco2a1	P08
Gm37928	4.58213e-130	0.272661	0.201	0.069	1.65364e-125	L5 PT ALM Slco2a1	P08
Gria1	8.07377e-130	0.294697	0.979	0.965	2.91374e-125	L5 PT ALM Slco2a1	P08
Itpr1	9.96209e-129	0.327293	0.836	0.788	3.59522e-124	L5 PT ALM Slco2a1	P08
Prkce	2.22475e-128	0.263889	0.987	0.979	8.02891e-124	L5 PT ALM Slco2a1	P08
RP24-263E2.3	1.79828e-127	0.297232	0.319	0.154	6.48981e-123	L5 PT ALM Slco2a1	P08
Grm8	1.20712e-126	0.297507	0.939	0.914	4.35639e-122	L5 PT ALM Slco2a1	P08
Gm26804	4.34922e-126	0.365319	0.342	0.182	1.56959e-121	L5 PT ALM Slco2a1	P08
Fhit	7.26812e-126	0.384344	0.714	0.646	2.62299e-121	L5 PT ALM Slco2a1	P08
Tnr	1.80208e-124	0.466509	0.727	0.621	6.50354e-120	L5 PT ALM Slco2a1	P08
Kcnj3	7.91932e-123	0.321887	0.791	0.749	2.858e-118	L5 PT ALM Slco2a1	P08
Gltscr1	1.44573e-122	0.29009	0.232	0.091	5.2175e-118	L5 PT ALM Slco2a1	P08
Tmeff1	6.73504e-122	0.312038	0.573	0.498	2.43061e-117	L5 PT ALM Slco2a1	P08
Gm20417	2.08915e-121	0.27298	0.243	0.1	7.53954e-117	L5 PT ALM Slco2a1	P08
Tenm4	2.6827e-121	0.292585	0.971	0.954	9.68161e-117	L5 PT ALM Slco2a1	P08
4930578G10Rik	8.1756e-121	0.276081	0.231	0.092	2.95049e-116	L5 PT ALM Slco2a1	P08
Gm21989	2.86775e-120	0.271917	0.206	0.075	1.03494e-115	L5 PT ALM Slco2a1	P08
Epo	1.56728e-119	0.295253	0.269	0.12	5.65615e-115	L5 PT ALM Slco2a1	P08
Iqsec1	5.91467e-119	0.29501	0.894	0.875	2.13454e-114	L5 PT ALM Slco2a1	P08
Thsd7b	6.53469e-119	0.474079	0.464	0.323	2.35831e-114	L5 PT ALM Slco2a1	P08
RP24-89C4.5	9.95782e-119	0.268592	0.228	0.091	3.59368e-114	L5 PT ALM Slco2a1	P08
Slc9a9	1.60826e-118	0.336667	0.827	0.758	5.80403e-114	L5 PT ALM Slco2a1	P08
Man1a	9.40483e-118	0.357278	0.415	0.259	3.39411e-113	L5 PT ALM Slco2a1	P08
Alcam	4.28382e-116	0.402539	0.754	0.639	1.54599e-111	L5 PT ALM Slco2a1	P08
Zfp827	1.24842e-114	0.301513	0.711	0.656	4.50543e-110	L5 PT ALM Slco2a1	P08
Gm44742	2.76669e-114	0.288727	0.236	0.099	9.9847e-110	L5 PT ALM Slco2a1	P08
Tox	5.1292e-114	0.312329	0.938	0.887	1.85108e-109	L5 PT ALM Slco2a1	P08
Brinp3	2.44342e-113	0.330704	0.853	0.728	8.81807e-109	L5 PT ALM Slco2a1	P08
Lnpk1	3.7187e-113	0.273287	0.25	0.108	1.34204e-108	L5 PT ALM Slco2a1	P08
Gabbr2	4.17163e-111	0.259724	0.945	0.935	1.5055e-106	L5 PT ALM Slco2a1	P08
Dner	4.86952e-111	0.337036	0.794	0.708	1.75736e-106	L5 PT ALM Slco2a1	P08
1110037F02Rik	2.22027e-110	0.281738	0.248	0.11	8.01275e-106	L5 PT ALM Slco2a1	P08
Sertad2	2.44434e-109	0.313258	0.76	0.709	8.82137e-105	L5 PT ALM Slco2a1	P08
Zfp608	2.62608e-109	0.343689	0.436	0.337	9.47725e-105	L5 PT ALM Slco2a1	P08
Fhod3	4.51664e-109	0.313662	0.891	0.821	1.63001e-104	L5 PT ALM Slco2a1	P08
Mia2.1	7.51652e-109	0.252989	0.211	0.084	2.71264e-104	L5 PT ALM Slco2a1	P08
Gucy1a3	3.38678e-108	0.266672	0.278	0.134	1.22226e-103	L5 PT ALM Slco2a1	P08
Myo16	5.90947e-107	0.263599	0.959	0.947	2.13267e-102	L5 PT ALM Slco2a1	P08
Gm26618	7.0603e-107	0.254928	0.211	0.085	2.54799e-102	L5 PT ALM Slco2a1	P08
Gm14306	1.30997e-106	0.274705	0.242	0.107	4.72757e-102	L5 PT ALM Slco2a1	P08
Gm14172	9.80392e-105	0.260574	0.227	0.097	3.53814e-100	L5 PT ALM Slco2a1	P08
Pcdh17	9.44583e-103	0.341379	0.642	0.557	3.40891e-98	L5 PT ALM Slco2a1	P08
Luzp2	1.0732e-102	0.366725	0.83	0.711	3.87306e-98	L5 PT ALM Slco2a1	P08
Gm37340	4.30166e-102	0.251482	0.199	0.079	1.55243e-97	L5 PT ALM Slco2a1	P08
Tssc1	1.41474e-101	0.258919	0.238	0.107	5.10565e-97	L5 PT ALM Slco2a1	P08
Foxp1	1.42843e-101	0.2663	0.927	0.874	5.15505e-97	L5 PT ALM Slco2a1	P08
Pitpnc1	2.52749e-100	0.320445	0.697	0.683	9.12147e-96	L5 PT ALM Slco2a1	P08
Meis2	2.31347e-99	0.355382	0.871	0.817	8.34908e-95	L5 PT ALM Slco2a1	P08
Clmp	1.18905e-98	0.307592	0.716	0.639	4.29115e-94	L5 PT ALM Slco2a1	P08
Esrrg	4.36778e-98	0.293576	0.888	0.857	1.57629e-93	L5 PT ALM Slco2a1	P08
Gm44593	1.72138e-97	0.353539	0.531	0.414	6.21229e-93	L5 PT ALM Slco2a1	P08
Large1	3.55704e-97	0.25885	0.982	0.976	1.2837e-92	L5 PT ALM Slco2a1	P08
Bcl11b	7.20063e-95	0.250089	0.949	0.934	2.59864e-90	L5 PT ALM Slco2a1	P08
Elavl2	1.27578e-94	0.257816	0.83	0.803	4.60417e-90	L5 PT ALM Slco2a1	P08
Ano4	2.61233e-93	0.262724	0.874	0.846	9.42763e-89	L5 PT ALM Slco2a1	P08
Tlk1	2.86209e-93	0.265347	0.632	0.576	1.0329e-88	L5 PT ALM Slco2a1	P08
Osbp2	3.95355e-93	0.258111	0.587	0.54	1.4268e-88	L5 PT ALM Slco2a1	P08
Slc16a2	5.24475e-93	0.336793	0.593	0.506	1.89278e-88	L5 PT ALM Slco2a1	P08
Bmpr1b	7.4468e-92	0.350343	0.151	0.062	2.68748e-87	L5 PT ALM Slco2a1	P08
Ndst3	8.87382e-92	0.359176	0.477	0.387	3.20247e-87	L5 PT ALM Slco2a1	P08
Tcerg1l	4.40365e-91	0.323827	0.901	0.876	1.58923e-86	L5 PT ALM Slco2a1	P08
Lyrm4	9.42225e-91	0.296013	0.301	0.173	3.4004e-86	L5 PT ALM Slco2a1	P08
Sorl1	2.41593e-90	0.258225	0.843	0.798	8.71885e-86	L5 PT ALM Slco2a1	P08
Kcnd3	2.35487e-89	0.315182	0.483	0.386	8.49849e-85	L5 PT ALM Slco2a1	P08
Grm3	5.85008e-88	0.283337	0.894	0.862	2.11124e-83	L5 PT ALM Slco2a1	P08
Zeb2	7.10679e-87	0.268903	0.958	0.931	2.56477e-82	L5 PT ALM Slco2a1	P08
Zswim5	1.41568e-86	0.287169	0.381	0.276	5.10903e-82	L5 PT ALM Slco2a1	P08
Fam65b	4.92325e-86	0.260705	0.272	0.142	1.77675e-81	L5 PT ALM Slco2a1	P08
Plekha7	1.92965e-84	0.266967	0.342	0.225	6.9639e-80	L5 PT ALM Slco2a1	P08
Prune2	5.36916e-84	0.261688	0.316	0.25	1.93768e-79	L5 PT ALM Slco2a1	P08
Lcorl	8.62069e-84	0.2806	0.39	0.3	3.11112e-79	L5 PT ALM Slco2a1	P08
Reck	3.09588e-81	0.261392	0.377	0.283	1.11727e-76	L5 PT ALM Slco2a1	P08
Vwc2	6.31198e-81	0.273687	0.277	0.152	2.27793e-76	L5 PT ALM Slco2a1	P08
Rasgrp1	8.33988e-81	0.275655	0.417	0.287	3.00978e-76	L5 PT ALM Slco2a1	P08
Hs3st5	5.89846e-80	0.319981	0.807	0.761	2.12869e-75	L5 PT ALM Slco2a1	P08
Tmem117	5.81464e-79	0.251203	0.633	0.583	2.09845e-74	L5 PT ALM Slco2a1	P08
Zbtb16	3.03703e-78	0.288568	0.516	0.446	1.09603e-73	L5 PT ALM Slco2a1	P08
Grk3	4.73632e-77	0.253127	0.607	0.553	1.70929e-72	L5 PT ALM Slco2a1	P08
Snca	9.46104e-77	0.281998	0.591	0.51	3.4144e-72	L5 PT ALM Slco2a1	P08
Mctp2	2.15375e-75	0.281704	0.354	0.223	7.77266e-71	L5 PT ALM Slco2a1	P08
Nxn	8.80868e-72	0.279143	0.353	0.25	3.17896e-67	L5 PT ALM Slco2a1	P08
Necab1	2.7118e-71	0.305157	0.777	0.685	9.78662e-67	L5 PT ALM Slco2a1	P08
4930419G24Rik	1.67463e-68	0.255091	0.727	0.69	6.04356e-64	L5 PT ALM Slco2a1	P08
Nkain3	5.7175e-66	0.272867	0.833	0.798	2.06339e-61	L5 PT ALM Slco2a1	P08
Gm30382	1.1967e-55	0.345426	0.894	0.864	4.31877e-51	L5 PT ALM Slco2a1	P08
Pcdh11x	2.27349e-47	0.276829	0.604	0.552	8.20479e-43	L5 PT ALM Slco2a1	P08
Egfem1	0	1.95428	0.668	0.282	0	L5 PT ALM Hpgd	P08
Stxbp6	0	1.06306	0.526	0.212	0	L5 PT ALM Hpgd	P08
Fstl4	0	0.893529	0.657	0.352	0	L5 PT ALM Hpgd	P08
Gria4	0	0.842253	0.822	0.625	0	L5 PT ALM Hpgd	P08
Kctd8	0	0.805443	0.55	0.24	0	L5 PT ALM Hpgd	P08
Dlg2	0	0.780201	0.765	0.46	0	L5 PT ALM Hpgd	P08
Ccbe1	0	0.77689	0.556	0.238	0	L5 PT ALM Hpgd	P08
A230057D06Rik	0	0.765047	0.706	0.393	0	L5 PT ALM Hpgd	P08
Robo1	0	0.614179	0.987	0.973	0	L5 PT ALM Hpgd	P08
Rbfox1	7.906e-299	0.395486	0.999	1	2.8532e-294	L5 PT ALM Hpgd	P08
Oxr1	5.50275e-290	0.59996	0.887	0.769	1.98589e-285	L5 PT ALM Hpgd	P08
Gm2164	2.0932e-284	0.741721	0.607	0.325	7.55417e-280	L5 PT ALM Hpgd	P08
Tcf25	2.2993e-282	0.603839	0.667	0.369	8.29796e-278	L5 PT ALM Hpgd	P08
Galnt17	1.94764e-274	0.617279	0.448	0.184	7.02883e-270	L5 PT ALM Hpgd	P08
AC129186.1	3.6313e-269	0.446713	0.664	0.383	1.3105e-264	L5 PT ALM Hpgd	P08
Auts2	2.81608e-264	0.330175	0.997	0.995	1.01629e-259	L5 PT ALM Hpgd	P08
AC149090.1	3.09904e-240	0.697129	0.6	0.328	1.11841e-235	L5 PT ALM Hpgd	P08
Hectd4	1.85576e-237	0.510363	0.626	0.352	6.69727e-233	L5 PT ALM Hpgd	P08
Kirrel3	6.8746e-236	0.595466	0.981	0.97	2.48097e-231	L5 PT ALM Hpgd	P08
Nsd3	3.68217e-229	0.499751	0.61	0.341	1.32886e-224	L5 PT ALM Hpgd	P08
Rasgef1b	5.20968e-226	0.400615	0.638	0.381	1.88012e-221	L5 PT ALM Hpgd	P08
AY036118	6.95526e-221	0.534496	0.599	0.335	2.51008e-216	L5 PT ALM Hpgd	P08
Gucy1a1	4.99221e-218	0.426078	0.41	0.177	1.80164e-213	L5 PT ALM Hpgd	P08
Gm47283	3.12157e-216	0.545473	0.542	0.289	1.12654e-211	L5 PT ALM Hpgd	P08
Lrrtm4	1.36094e-210	0.383738	1	0.998	4.91149e-206	L5 PT ALM Hpgd	P08
Gm42418	3.79484e-209	1.00795	0.978	0.944	1.36952e-204	L5 PT ALM Hpgd	P08
Gm40841	1.92758e-200	0.437713	0.577	0.327	6.95643e-196	L5 PT ALM Hpgd	P08
Klhl1	6.4013e-199	0.585754	0.71	0.498	2.31017e-194	L5 PT ALM Hpgd	P08
Arl15	2.35722e-185	0.482376	0.932	0.883	8.50698e-181	L5 PT ALM Hpgd	P08
Magi3	1.28665e-184	0.399443	0.901	0.837	4.64339e-180	L5 PT ALM Hpgd	P08
Nsd2	1.81465e-182	0.422997	0.536	0.3	6.5489e-178	L5 PT ALM Hpgd	P08
Fgf12	2.32769e-178	0.382496	0.983	0.967	8.4004e-174	L5 PT ALM Hpgd	P08
Bicdl1	8.20523e-178	0.429725	0.489	0.264	2.96119e-173	L5 PT ALM Hpgd	P08
Gpc5	7.67684e-177	0.856771	0.923	0.912	2.77049e-172	L5 PT ALM Hpgd	P08
Rtl4	1.08627e-176	0.534486	0.521	0.293	3.92025e-172	L5 PT ALM Hpgd	P08
Gucy1b1	1.25445e-170	0.415463	0.492	0.271	4.52717e-166	L5 PT ALM Hpgd	P08
Col11a1	2.11671e-170	0.442684	0.279	0.108	7.63901e-166	L5 PT ALM Hpgd	P08
Slf2	3.94976e-169	0.405266	0.503	0.28	1.42543e-164	L5 PT ALM Hpgd	P08
Camk2d	1.34983e-166	0.464342	0.601	0.396	4.87138e-162	L5 PT ALM Hpgd	P08
Rab3c	3.93001e-165	0.392875	0.914	0.855	1.4183e-160	L5 PT ALM Hpgd	P08
Ahi1	9.98091e-164	0.254131	0.997	0.997	3.60201e-159	L5 PT ALM Hpgd	P08
Sorbs2	1.37293e-159	0.462226	0.814	0.686	4.95476e-155	L5 PT ALM Hpgd	P08
Zranb2	1.97698e-158	0.406922	0.909	0.822	7.13472e-154	L5 PT ALM Hpgd	P08
Runx1t1	1.12728e-155	0.47165	0.702	0.552	4.06825e-151	L5 PT ALM Hpgd	P08
Nos1ap	1.10901e-154	0.363812	0.952	0.927	4.00229e-150	L5 PT ALM Hpgd	P08
Pbx3	1.66501e-153	0.586563	0.569	0.42	6.00884e-149	L5 PT ALM Hpgd	P08
Pabpn1	2.55676e-153	0.40731	0.555	0.343	9.22709e-149	L5 PT ALM Hpgd	P08
CT025619.1	3.98109e-152	0.389951	0.493	0.282	1.43673e-147	L5 PT ALM Hpgd	P08
Lamp5	1.69061e-150	0.287607	0.296	0.124	6.10126e-146	L5 PT ALM Hpgd	P08
Gm28175	1.26535e-149	0.42639	0.382	0.207	4.5665e-145	L5 PT ALM Hpgd	P08
Kcnc2	6.80833e-149	0.382904	0.35	0.163	2.45706e-144	L5 PT ALM Hpgd	P08
Satb2	8.385e-149	0.494985	0.851	0.725	3.02606e-144	L5 PT ALM Hpgd	P08
Wwc1	6.12525e-148	0.414729	0.893	0.837	2.21054e-143	L5 PT ALM Hpgd	P08
C78859	3.08675e-147	0.337617	0.468	0.261	1.11398e-142	L5 PT ALM Hpgd	P08
Kctd16	4.39601e-147	0.451048	0.736	0.559	1.58648e-142	L5 PT ALM Hpgd	P08
Igsf3	2.61672e-146	0.322536	0.445	0.243	9.44347e-142	L5 PT ALM Hpgd	P08
Tmem131l	5.90153e-146	0.357413	0.463	0.258	2.1298e-141	L5 PT ALM Hpgd	P08
Kif26b	4.79132e-145	0.4087	0.788	0.647	1.72914e-140	L5 PT ALM Hpgd	P08
Gm36251	8.0404e-145	0.381812	0.275	0.113	2.9017e-140	L5 PT ALM Hpgd	P08
Tspoap1	1.68556e-143	0.368722	0.409	0.216	6.08303e-139	L5 PT ALM Hpgd	P08
Clvs1	2.11216e-141	0.363426	0.807	0.662	7.62258e-137	L5 PT ALM Hpgd	P08
Ripor2	2.62064e-141	0.335637	0.425	0.228	9.45764e-137	L5 PT ALM Hpgd	P08
Kcnk9	2.87957e-141	0.290156	0.276	0.114	1.03921e-136	L5 PT ALM Hpgd	P08
Nexmif	9.51506e-141	0.354542	0.483	0.279	3.43389e-136	L5 PT ALM Hpgd	P08
Prelid3a	1.2299e-138	0.338143	0.46	0.261	4.43857e-134	L5 PT ALM Hpgd	P08
Tenm3	1.86782e-138	0.963609	0.826	0.78	6.74079e-134	L5 PT ALM Hpgd	P08
Ptprk	8.33196e-138	0.58537	0.816	0.735	3.00692e-133	L5 PT ALM Hpgd	P08
Cit	6.46252e-137	0.368653	0.796	0.656	2.33226e-132	L5 PT ALM Hpgd	P08
Trpc4	8.29062e-136	0.321427	0.906	0.868	2.992e-131	L5 PT ALM Hpgd	P08
Sema6a	1.39649e-130	0.395367	0.725	0.551	5.03978e-126	L5 PT ALM Hpgd	P08
Gsdme	5.82323e-128	0.297046	0.471	0.278	2.10154e-123	L5 PT ALM Hpgd	P08
Fam189a1	5.44469e-125	0.34384	0.784	0.614	1.96494e-120	L5 PT ALM Hpgd	P08
Taco1	2.23335e-121	0.497295	0.508	0.325	8.05993e-117	L5 PT ALM Hpgd	P08
Eipr1	1.05918e-119	0.280111	0.362	0.191	3.82247e-115	L5 PT ALM Hpgd	P08
Klf12	1.95106e-119	0.372589	0.673	0.501	7.04118e-115	L5 PT ALM Hpgd	P08
Tox2	9.31496e-119	0.251072	0.308	0.148	3.36167e-114	L5 PT ALM Hpgd	P08
Sorcs3	1.47272e-118	0.332235	0.448	0.263	5.31491e-114	L5 PT ALM Hpgd	P08
Slc4a3	3.15325e-118	0.387524	0.776	0.643	1.13798e-113	L5 PT ALM Hpgd	P08
Hdgfl3	3.39831e-117	0.274264	0.441	0.258	1.22642e-112	L5 PT ALM Hpgd	P08
Gm16083	3.56831e-117	0.372714	0.73	0.6	1.28777e-112	L5 PT ALM Hpgd	P08
Babam2	7.86951e-117	0.287715	0.428	0.247	2.84003e-112	L5 PT ALM Hpgd	P08
Cdh12	5.32453e-116	0.383632	0.628	0.442	1.92157e-111	L5 PT ALM Hpgd	P08
Trpc7	6.74824e-115	0.342721	0.303	0.148	2.43537e-110	L5 PT ALM Hpgd	P08
Cpne4	2.9875e-114	0.39919	0.445	0.265	1.07816e-109	L5 PT ALM Hpgd	P08
Cdh4	5.40276e-114	0.733624	0.568	0.445	1.9498e-109	L5 PT ALM Hpgd	P08
Tshz3	2.71811e-113	0.34523	0.623	0.438	9.80938e-109	L5 PT ALM Hpgd	P08
Rfx3	8.43206e-113	0.331295	0.801	0.72	3.04305e-108	L5 PT ALM Hpgd	P08
AC165953.2	1.25605e-111	0.275838	0.442	0.263	4.53296e-107	L5 PT ALM Hpgd	P08
Cpne6	3.92149e-111	0.314751	0.466	0.29	1.41523e-106	L5 PT ALM Hpgd	P08
Zfp644	3.96315e-111	0.284907	0.421	0.245	1.43026e-106	L5 PT ALM Hpgd	P08
Luc7l3	5.71496e-110	0.366453	0.889	0.799	2.06247e-105	L5 PT ALM Hpgd	P08
Srrm2	8.17374e-110	0.329144	0.979	0.952	2.94982e-105	L5 PT ALM Hpgd	P08
Prpf4b	2.62788e-109	0.334487	0.863	0.772	9.48375e-105	L5 PT ALM Hpgd	P08
A830018L16Rik	3.34554e-109	0.33584	0.949	0.922	1.20737e-104	L5 PT ALM Hpgd	P08
Sulf2	1.1231e-107	0.375782	0.561	0.406	4.05316e-103	L5 PT ALM Hpgd	P08
Mia2	3.05581e-107	0.26609	0.378	0.211	1.10281e-102	L5 PT ALM Hpgd	P08
Retreg1	3.30234e-107	0.254718	0.364	0.2	1.19178e-102	L5 PT ALM Hpgd	P08
Lnpk	5.35256e-105	0.253967	0.38	0.215	1.93169e-100	L5 PT ALM Hpgd	P08
Nrgn	3.43327e-104	0.331353	0.811	0.696	1.23903e-99	L5 PT ALM Hpgd	P08
Gm49353	6.22481e-102	0.252014	0.397	0.231	2.24647e-97	L5 PT ALM Hpgd	P08
Chrm3	1.52304e-99	0.302815	0.879	0.775	5.49652e-95	L5 PT ALM Hpgd	P08
Cdh8	2.05075e-99	0.326492	0.932	0.895	7.40097e-95	L5 PT ALM Hpgd	P08
Gm11639	4.80642e-98	0.272111	0.252	0.122	1.73459e-93	L5 PT ALM Hpgd	P08
Tmeff2	1.15915e-97	0.285847	0.893	0.792	4.18325e-93	L5 PT ALM Hpgd	P08
Fmn1	2.16555e-92	0.308322	0.841	0.73	7.81526e-88	L5 PT ALM Hpgd	P08
Malat1	4.77848e-92	0.253742	1	1	1.72451e-87	L5 PT ALM Hpgd	P08
Sfpq	1.22148e-91	0.313971	0.81	0.699	4.4082e-87	L5 PT ALM Hpgd	P08
Mast4	5.09935e-91	0.326599	0.798	0.672	1.8403e-86	L5 PT ALM Hpgd	P08
Cntn3	1.32851e-90	0.257004	0.955	0.926	4.79445e-86	L5 PT ALM Hpgd	P08
Srsf11	3.77008e-90	0.323993	0.805	0.689	1.36058e-85	L5 PT ALM Hpgd	P08
Sobp	4.76325e-90	0.250557	0.944	0.92	1.71901e-85	L5 PT ALM Hpgd	P08
Washc2	8.40095e-89	0.258218	0.327	0.183	3.03182e-84	L5 PT ALM Hpgd	P08
Carmil3	4.62281e-87	0.283581	0.457	0.302	1.66833e-82	L5 PT ALM Hpgd	P08
Slc35f4	6.24891e-85	0.306196	0.662	0.51	2.25517e-80	L5 PT ALM Hpgd	P08
Atp2b4	5.42264e-84	0.315795	0.67	0.537	1.95697e-79	L5 PT ALM Hpgd	P08
Sorbs1	4.76981e-83	0.268958	0.87	0.812	1.72138e-78	L5 PT ALM Hpgd	P08
Dok5	1.41485e-81	0.292385	0.649	0.517	5.10606e-77	L5 PT ALM Hpgd	P08
Pantr1	4.97179e-81	0.310009	0.447	0.304	1.79427e-76	L5 PT ALM Hpgd	P08
Sema3e	7.32652e-81	0.311316	0.534	0.378	2.64407e-76	L5 PT ALM Hpgd	P08
Adcy8	8.86039e-80	0.292595	0.728	0.605	3.19762e-75	L5 PT ALM Hpgd	P08
Dync1i2	1.31674e-79	0.275868	0.898	0.847	4.752e-75	L5 PT ALM Hpgd	P08
Rnpc3	2.0924e-79	0.299205	0.634	0.496	7.55125e-75	L5 PT ALM Hpgd	P08
Ryr1	1.09901e-78	0.252304	0.305	0.178	3.96621e-74	L5 PT ALM Hpgd	P08
Hnrnpa2b1	2.24782e-78	0.289309	0.782	0.681	8.11215e-74	L5 PT ALM Hpgd	P08
Cmss1	3.11061e-78	0.461781	0.705	0.6	1.12259e-73	L5 PT ALM Hpgd	P08
Cacng3	3.53558e-78	0.28062	0.584	0.437	1.27595e-73	L5 PT ALM Hpgd	P08
Gm26917	1.50318e-77	0.532697	0.681	0.575	5.42484e-73	L5 PT ALM Hpgd	P08
Calm1	1.50457e-77	0.32594	0.696	0.565	5.42985e-73	L5 PT ALM Hpgd	P08
Slc24a3	8.7035e-77	0.315835	0.614	0.468	3.14101e-72	L5 PT ALM Hpgd	P08
Tbc1d5	6.89767e-75	0.267032	0.867	0.799	2.4893e-70	L5 PT ALM Hpgd	P08
Pcsk6	2.74485e-73	0.264876	0.298	0.171	9.90588e-69	L5 PT ALM Hpgd	P08
Epha6	2.80232e-73	0.344811	0.942	0.887	1.01133e-68	L5 PT ALM Hpgd	P08
Tmem150c	3.57645e-73	0.271683	0.697	0.573	1.2907e-68	L5 PT ALM Hpgd	P08
Ice1	1.92862e-71	0.298394	0.709	0.586	6.9602e-67	L5 PT ALM Hpgd	P08
Timm44	3.50216e-71	0.283531	0.633	0.499	1.26389e-66	L5 PT ALM Hpgd	P08
5730522E02Rik	3.56891e-71	0.336559	0.937	0.928	1.28799e-66	L5 PT ALM Hpgd	P08
Frmd6	7.89104e-70	0.260281	0.394	0.265	2.8478e-65	L5 PT ALM Hpgd	P08
Ktn1	1.97689e-69	0.252036	0.873	0.802	7.13441e-65	L5 PT ALM Hpgd	P08
Nrip1	4.48082e-69	0.296987	0.502	0.369	1.61708e-64	L5 PT ALM Hpgd	P08
Son	2.64902e-68	0.281438	0.88	0.819	9.56005e-64	L5 PT ALM Hpgd	P08
Sfmbt2	1.97455e-67	0.271955	0.461	0.33	7.12594e-63	L5 PT ALM Hpgd	P08
Hsp90aa1	1.55802e-64	0.259178	0.395	0.264	5.62273e-60	L5 PT ALM Hpgd	P08
Pcgf5	6.17523e-64	0.267816	0.361	0.238	2.22858e-59	L5 PT ALM Hpgd	P08
Hnrnpdl	2.37791e-63	0.253156	0.651	0.53	8.58165e-59	L5 PT ALM Hpgd	P08
Shisa6	2.37431e-61	0.278546	0.176	0.102	8.56864e-57	L5 PT ALM Hpgd	P08
Chd5	2.60209e-61	0.30023	0.76	0.662	9.39069e-57	L5 PT ALM Hpgd	P08
Grm1	7.60479e-61	0.266048	0.672	0.559	2.74449e-56	L5 PT ALM Hpgd	P08
Ptprz1	1.96058e-60	0.273586	0.441	0.311	7.07555e-56	L5 PT ALM Hpgd	P08
AC121788.1	1.79892e-59	0.374373	0.252	0.144	6.49213e-55	L5 PT ALM Hpgd	P08
Cdh18	3.23624e-59	0.446289	0.697	0.609	1.16793e-54	L5 PT ALM Hpgd	P08
Vcan	4.76601e-58	0.259524	0.613	0.484	1.72e-53	L5 PT ALM Hpgd	P08
Sorcs2	7.15807e-56	0.261776	0.77	0.674	2.58327e-51	L5 PT ALM Hpgd	P08
Tuba1a	1.12593e-54	0.306358	0.657	0.555	4.06337e-50	L5 PT ALM Hpgd	P08
Shc3	2.44796e-54	0.259806	0.558	0.436	8.83443e-50	L5 PT ALM Hpgd	P08
Camk2a	5.92411e-54	0.253588	0.871	0.801	2.13795e-49	L5 PT ALM Hpgd	P08
Lhfp	3.06461e-46	0.266958	0.494	0.4	1.10599e-41	L5 PT ALM Hpgd	P08
Cadm1	1.26563e-43	0.269767	0.936	0.926	4.56752e-39	L5 PT ALM Hpgd	P08
Cwc22	8.56672e-18	0.278442	0.585	0.538	3.09164e-13	L5 PT ALM Hpgd	P08
Dcc	0	3.53131	0.959	0.396	0	L5 PT ALM Npsr1	P08
Rora	0	2.3556	0.971	0.791	0	L5 PT ALM Npsr1	P08
Grin3a	0	2.03052	0.968	0.482	0	L5 PT ALM Npsr1	P08
Tmtc2	0	1.99876	0.989	0.769	0	L5 PT ALM Npsr1	P08
Sorcs1	0	1.93879	1	0.915	0	L5 PT ALM Npsr1	P08
Reln	0	1.65988	0.871	0.6	0	L5 PT ALM Npsr1	P08
Sorcs3	0	1.60543	0.877	0.287	0	L5 PT ALM Npsr1	P08
Vwc2l	0	1.59577	0.86	0.328	0	L5 PT ALM Npsr1	P08
Tmeff2	0	1.32035	0.986	0.817	0	L5 PT ALM Npsr1	P08
Dgkb	0	1.30865	0.966	0.718	0	L5 PT ALM Npsr1	P08
Samd5	0	1.27482	0.836	0.293	0	L5 PT ALM Npsr1	P08
Ncald	0	1.24338	0.879	0.503	0	L5 PT ALM Npsr1	P08
Nwd2	0	1.23364	0.954	0.774	0	L5 PT ALM Npsr1	P08
Ltbp1	0	1.23303	0.653	0.126	0	L5 PT ALM Npsr1	P08
Rbms3	0	1.22018	0.891	0.396	0	L5 PT ALM Npsr1	P08
Fn1	0	1.21134	0.499	0.036	0	L5 PT ALM Npsr1	P08
Ust	0	1.17403	0.926	0.65	0	L5 PT ALM Npsr1	P08
Ttc28	0	1.10263	0.928	0.586	0	L5 PT ALM Npsr1	P08
Satb2	0	1.09946	0.962	0.756	0	L5 PT ALM Npsr1	P08
Wdpcp	0	1.08666	0.806	0.419	0	L5 PT ALM Npsr1	P08
Piezo2	0	1.07576	0.359	0.019	0	L5 PT ALM Npsr1	P08
Nrg1	0	1.03538	1	0.996	0	L5 PT ALM Npsr1	P08
Cers6	0	0.972541	0.961	0.769	0	L5 PT ALM Npsr1	P08
Ehbp1	0	0.943102	0.979	0.883	0	L5 PT ALM Npsr1	P08
Npnt	0	0.937273	0.702	0.175	0	L5 PT ALM Npsr1	P08
Csmd1	0	0.784822	1	1	0	L5 PT ALM Npsr1	P08
Otx1	0	0.767402	0.542	0.061	0	L5 PT ALM Npsr1	P08
Lrp2	0	0.71493	0.446	0.019	0	L5 PT ALM Npsr1	P08
Pcdh9	2.86597e-302	1.37163	0.998	0.987	1.0343e-297	L5 PT ALM Npsr1	P08
Il1rapl2	5.8818e-293	1.82225	0.566	0.172	2.12268e-288	L5 PT ALM Npsr1	P08
Fam196b	7.23546e-284	0.612914	0.385	0.034	2.6112e-279	L5 PT ALM Npsr1	P08
Pou6f2	6.43508e-283	0.889691	0.46	0.065	2.32235e-278	L5 PT ALM Npsr1	P08
Nr3c2	4.39428e-272	0.937885	0.952	0.666	1.58585e-267	L5 PT ALM Npsr1	P08
Brinp2	2.47691e-258	0.862504	0.725	0.267	8.93893e-254	L5 PT ALM Npsr1	P08
Gm45881	4.00097e-254	0.930616	0.614	0.185	1.44391e-249	L5 PT ALM Npsr1	P08
Cntn3	2.91792e-250	0.883048	0.994	0.933	1.05305e-245	L5 PT ALM Npsr1	P08
Sash1	2.34484e-247	0.738783	0.613	0.167	8.46229e-243	L5 PT ALM Npsr1	P08
Ptprn2	2.50624e-247	0.612738	0.998	0.989	9.04476e-243	L5 PT ALM Npsr1	P08
Sgcd	1.38014e-246	1.26074	0.909	0.708	4.98077e-242	L5 PT ALM Npsr1	P08
Nrxn3	1.02171e-224	0.507737	1	1	3.68726e-220	L5 PT ALM Npsr1	P08
Adamtsl1	2.38432e-223	1.3754	0.607	0.371	8.60479e-219	L5 PT ALM Npsr1	P08
Kcnb2	1.48532e-222	0.652623	0.998	0.988	5.36037e-218	L5 PT ALM Npsr1	P08
Lgr4	4.2565e-217	0.801393	0.68	0.29	1.53613e-212	L5 PT ALM Npsr1	P08
Cdh8	2.05431e-215	0.870374	0.988	0.902	7.41378e-211	L5 PT ALM Npsr1	P08
Gm32647	2.5433e-215	0.852495	0.349	0.056	9.1785e-211	L5 PT ALM Npsr1	P08
Gm48749	1.06499e-210	0.474481	0.36	0.048	3.84343e-206	L5 PT ALM Npsr1	P08
Gm45352	3.43415e-196	0.5199	0.474	0.108	1.23935e-191	L5 PT ALM Npsr1	P08
Pcdh15	3.57817e-177	0.943753	0.944	0.662	1.29132e-172	L5 PT ALM Npsr1	P08
Utrn	1.80049e-175	0.88124	0.799	0.615	6.49779e-171	L5 PT ALM Npsr1	P08
Spock3	9.8482e-175	0.802596	0.473	0.153	3.55412e-170	L5 PT ALM Npsr1	P08
Vgll3	1.47937e-171	0.418184	0.336	0.055	5.33891e-167	L5 PT ALM Npsr1	P08
Arap2	2.76932e-169	0.70352	0.907	0.696	9.9942e-165	L5 PT ALM Npsr1	P08
Htr7	2.9466e-168	0.459707	0.469	0.124	1.0634e-163	L5 PT ALM Npsr1	P08
Nol4	1.32361e-164	0.681953	0.938	0.752	4.77677e-160	L5 PT ALM Npsr1	P08
Gm49171	1.2935e-161	0.576149	0.364	0.077	4.66809e-157	L5 PT ALM Npsr1	P08
Postn	1.40322e-159	0.946504	0.485	0.156	5.06408e-155	L5 PT ALM Npsr1	P08
Asic2	3.31341e-157	0.549693	1	0.998	1.19578e-152	L5 PT ALM Npsr1	P08
Satb1	5.69144e-156	0.731107	0.786	0.434	2.05398e-151	L5 PT ALM Npsr1	P08
Kcnh5	1.63049e-152	0.630227	0.467	0.136	5.88426e-148	L5 PT ALM Npsr1	P08
Gm20754	2.36186e-151	0.621708	0.996	0.961	8.52371e-147	L5 PT ALM Npsr1	P08
Unc13c	1.78451e-149	0.686416	0.4	0.101	6.44011e-145	L5 PT ALM Npsr1	P08
Npas3	2.49172e-147	0.883518	0.535	0.248	8.99236e-143	L5 PT ALM Npsr1	P08
Plcb4	7.8781e-146	0.655565	0.912	0.669	2.84313e-141	L5 PT ALM Npsr1	P08
Fam19a1	2.93256e-142	0.42531	1	1	1.05833e-137	L5 PT ALM Npsr1	P08
Lmo4	6.04046e-141	0.580661	0.553	0.214	2.17994e-136	L5 PT ALM Npsr1	P08
Klhl32	3.68417e-139	0.597261	0.9	0.641	1.32958e-134	L5 PT ALM Npsr1	P08
Pdzd2	5.89862e-138	0.552043	0.984	0.955	2.12875e-133	L5 PT ALM Npsr1	P08
Aff2	6.19973e-136	0.692957	0.861	0.573	2.23742e-131	L5 PT ALM Npsr1	P08
Lsamp	3.58738e-133	0.444597	1	0.968	1.29465e-128	L5 PT ALM Npsr1	P08
Htr2a	8.47567e-133	0.72031	0.683	0.374	3.05879e-128	L5 PT ALM Npsr1	P08
Dixdc1	2.98583e-131	0.592697	0.786	0.475	1.07756e-126	L5 PT ALM Npsr1	P08
Cxxc4	9.67765e-129	0.605204	0.751	0.447	3.49257e-124	L5 PT ALM Npsr1	P08
Nrip1	1.2211e-127	0.628381	0.721	0.394	4.40682e-123	L5 PT ALM Npsr1	P08
Plxna2	1.89976e-127	0.588402	0.951	0.802	6.85603e-123	L5 PT ALM Npsr1	P08
Zfp385b	8.63527e-127	0.521298	0.988	0.913	3.11638e-122	L5 PT ALM Npsr1	P08
Tgfb2	1.56931e-126	0.49647	0.317	0.069	5.66348e-122	L5 PT ALM Npsr1	P08
Tmcc3	1.10559e-125	0.291378	0.218	0.027	3.98997e-121	L5 PT ALM Npsr1	P08
Col12a1	8.78274e-124	0.416552	0.273	0.051	3.1696e-119	L5 PT ALM Npsr1	P08
Mctp1	2.56411e-121	0.565155	0.965	0.85	9.25362e-117	L5 PT ALM Npsr1	P08
Kcnh8	8.115e-121	0.318499	0.26	0.045	2.92862e-116	L5 PT ALM Npsr1	P08
Gm13936	1.95763e-118	0.326143	0.266	0.049	7.06489e-114	L5 PT ALM Npsr1	P08
Tshz1	3.88313e-118	0.252252	0.182	0.018	1.40138e-113	L5 PT ALM Npsr1	P08
Brinp3	2.71896e-114	0.889051	0.919	0.784	9.81245e-110	L5 PT ALM Npsr1	P08
Met	3.97139e-114	0.647169	0.736	0.487	1.43323e-109	L5 PT ALM Npsr1	P08
Peli2	5.74549e-112	0.353366	0.306	0.072	2.07349e-107	L5 PT ALM Npsr1	P08
Olfm3	6.5543e-112	0.728587	0.52	0.222	2.36538e-107	L5 PT ALM Npsr1	P08
Ildr2	7.06892e-112	0.524729	0.883	0.647	2.5511e-107	L5 PT ALM Npsr1	P08
Myo1b	8.72791e-112	0.442011	0.473	0.175	3.14981e-107	L5 PT ALM Npsr1	P08
Zmat4	1.97556e-110	0.541322	0.508	0.208	7.12959e-106	L5 PT ALM Npsr1	P08
4930587E11Rik	2.61318e-110	0.539473	0.521	0.216	9.43072e-106	L5 PT ALM Npsr1	P08
Trpa1	3.69248e-110	0.274798	0.298	0.07	1.33258e-105	L5 PT ALM Npsr1	P08
Prodh	5.35993e-110	0.450524	0.462	0.172	1.93434e-105	L5 PT ALM Npsr1	P08
Cpne4	1.13782e-107	0.645284	0.621	0.309	4.10628e-103	L5 PT ALM Npsr1	P08
Tshz3	1.0129e-106	0.654332	0.738	0.489	3.65545e-102	L5 PT ALM Npsr1	P08
Prrg1	3.59768e-106	0.502949	0.432	0.157	1.29837e-101	L5 PT ALM Npsr1	P08
Tacr3	5.68863e-106	0.29813	0.212	0.033	2.05297e-101	L5 PT ALM Npsr1	P08
C1ql3	1.50001e-105	0.562654	0.583	0.289	5.41339e-101	L5 PT ALM Npsr1	P08
Il1rapl1	1.15932e-102	0.398166	1	0.994	4.18387e-98	L5 PT ALM Npsr1	P08
Pde7b	1.74561e-102	0.427744	0.36	0.109	6.29974e-98	L5 PT ALM Npsr1	P08
Sh3gl2	9.44282e-102	0.519413	0.931	0.785	3.40782e-97	L5 PT ALM Npsr1	P08
Astn1	1.30058e-101	0.494975	0.91	0.728	4.69366e-97	L5 PT ALM Npsr1	P08
Galnt17	4.34013e-101	0.630276	0.56	0.261	1.56631e-96	L5 PT ALM Npsr1	P08
Kctd8	9.8259e-100	0.603705	0.648	0.334	3.54607e-95	L5 PT ALM Npsr1	P08
Cblb	4.2469e-99	0.530891	0.699	0.428	1.53266e-94	L5 PT ALM Npsr1	P08
Epha6	2.36694e-98	0.500515	0.986	0.901	8.54206e-94	L5 PT ALM Npsr1	P08
Cald1	3.73682e-98	0.367659	0.266	0.061	1.34858e-93	L5 PT ALM Npsr1	P08
Scml2	1.17264e-97	0.251136	0.263	0.06	4.23193e-93	L5 PT ALM Npsr1	P08
Tmem132b	9.07898e-97	0.479406	0.958	0.809	3.27651e-92	L5 PT ALM Npsr1	P08
Car10	1.3173e-96	0.773173	0.398	0.151	4.75402e-92	L5 PT ALM Npsr1	P08
Dapk1	2.15974e-96	0.493403	0.943	0.853	7.79429e-92	L5 PT ALM Npsr1	P08
Man2a1	3.38158e-96	0.456939	0.754	0.447	1.22038e-91	L5 PT ALM Npsr1	P08
Robo3	1.12979e-95	0.430675	0.451	0.177	4.0773e-91	L5 PT ALM Npsr1	P08
Tbc1d4	4.4964e-95	0.271699	0.226	0.044	1.62271e-90	L5 PT ALM Npsr1	P08
Prickle1	1.51862e-94	0.518809	0.981	0.891	5.48055e-90	L5 PT ALM Npsr1	P08
Auts2	2.08457e-93	0.340349	1	0.996	7.52302e-89	L5 PT ALM Npsr1	P08
Galnt18	5.80228e-93	0.452445	0.963	0.844	2.09399e-88	L5 PT ALM Npsr1	P08
Kcnk2	1.05217e-92	0.416954	0.683	0.377	3.79718e-88	L5 PT ALM Npsr1	P08
Tcf12	1.5209e-92	0.582595	0.792	0.612	5.48878e-88	L5 PT ALM Npsr1	P08
Frmpd4	2.4871e-92	0.477673	0.986	0.924	8.97568e-88	L5 PT ALM Npsr1	P08
Galnt13	7.52032e-91	0.498467	0.987	0.916	2.71401e-86	L5 PT ALM Npsr1	P08
Cldn34c1	1.5322e-90	0.29017	0.274	0.07	5.52954e-86	L5 PT ALM Npsr1	P08
Npc2	2.44574e-90	0.25886	0.288	0.078	8.82643e-86	L5 PT ALM Npsr1	P08
Rarb	4.49866e-90	0.707889	0.486	0.235	1.62352e-85	L5 PT ALM Npsr1	P08
Gm15398	1.12971e-89	0.363732	0.445	0.179	4.077e-85	L5 PT ALM Npsr1	P08
Runx1t1	9.32079e-89	0.557053	0.82	0.591	3.36378e-84	L5 PT ALM Npsr1	P08
Adamts17	2.24589e-88	0.478996	0.491	0.218	8.10518e-84	L5 PT ALM Npsr1	P08
Cnih3	9.73534e-87	0.514928	0.686	0.419	3.51339e-82	L5 PT ALM Npsr1	P08
Hs3st4	4.29286e-83	0.802209	0.563	0.383	1.54925e-78	L5 PT ALM Npsr1	P08
E130308A19Rik	7.26928e-83	0.280055	0.344	0.119	2.62341e-78	L5 PT ALM Npsr1	P08
Rcan2	2.14291e-82	0.337168	0.419	0.17	7.73356e-78	L5 PT ALM Npsr1	P08
Tmem65	4.44499e-81	0.379329	0.499	0.235	1.60415e-76	L5 PT ALM Npsr1	P08
Fam189a1	5.27668e-81	0.504709	0.87	0.663	1.9043e-76	L5 PT ALM Npsr1	P08
Ripor2	7.50235e-81	0.438092	0.558	0.281	2.70752e-76	L5 PT ALM Npsr1	P08
Gpc6	9.08043e-81	0.568698	0.977	0.943	3.27703e-76	L5 PT ALM Npsr1	P08
Synpr	2.29752e-80	0.583165	0.449	0.212	8.29153e-76	L5 PT ALM Npsr1	P08
4930509J09Rik	7.53564e-80	0.489456	0.68	0.415	2.71954e-75	L5 PT ALM Npsr1	P08
Slc24a3	2.48803e-79	0.524681	0.764	0.503	8.97907e-75	L5 PT ALM Npsr1	P08
Npr3	2.30551e-78	0.494581	0.776	0.572	8.32037e-74	L5 PT ALM Npsr1	P08
Lgi1	3.76748e-78	0.54432	0.772	0.615	1.35965e-73	L5 PT ALM Npsr1	P08
Dpy19l1	7.00195e-78	0.436499	0.645	0.375	2.52694e-73	L5 PT ALM Npsr1	P08
Zfpm2	8.1528e-78	0.682898	0.698	0.562	2.94226e-73	L5 PT ALM Npsr1	P08
St6gal2	4.91466e-77	0.377286	0.52	0.256	1.77365e-72	L5 PT ALM Npsr1	P08
Col8a1	1.20955e-76	0.638879	0.227	0.074	4.36514e-72	L5 PT ALM Npsr1	P08
Adamts20	2.65379e-76	0.388564	0.685	0.412	9.57727e-72	L5 PT ALM Npsr1	P08
Epb41l4b	4.86573e-76	0.280011	0.316	0.107	1.75599e-71	L5 PT ALM Npsr1	P08
Prkg1	1.66442e-75	0.604194	0.609	0.369	6.00674e-71	L5 PT ALM Npsr1	P08
Pbx1	4.16287e-75	0.401402	0.99	0.966	1.50234e-70	L5 PT ALM Npsr1	P08
Inpp4b	1.29423e-73	0.336697	0.241	0.065	4.67074e-69	L5 PT ALM Npsr1	P08
Cdk14	4.22531e-73	0.439717	0.911	0.768	1.52487e-68	L5 PT ALM Npsr1	P08
Dscam	6.77398e-73	0.353341	0.989	0.951	2.44466e-68	L5 PT ALM Npsr1	P08
Lhfp	8.31026e-73	0.562916	0.67	0.416	2.99909e-68	L5 PT ALM Npsr1	P08
Kcnc2	9.21359e-73	0.557546	0.455	0.216	3.32509e-68	L5 PT ALM Npsr1	P08
Cplx2	3.33013e-72	0.336913	0.652	0.383	1.20181e-67	L5 PT ALM Npsr1	P08
Gm40841	4.02354e-72	0.446085	0.669	0.401	1.45206e-67	L5 PT ALM Npsr1	P08
Heatr5a	1.12934e-71	0.358867	0.669	0.4	4.07568e-67	L5 PT ALM Npsr1	P08
Esyt2	1.89141e-71	0.416829	0.885	0.73	6.8259e-67	L5 PT ALM Npsr1	P08
Stx3	2.41901e-71	0.318503	0.502	0.248	8.72997e-67	L5 PT ALM Npsr1	P08
Chrm2	1.31017e-70	0.411435	0.755	0.493	4.72826e-66	L5 PT ALM Npsr1	P08
Tspan33	5.37518e-70	0.251543	0.369	0.151	1.93985e-65	L5 PT ALM Npsr1	P08
Tex2	2.03992e-69	0.324965	0.588	0.327	7.36187e-65	L5 PT ALM Npsr1	P08
Cop1	1.08407e-68	0.326056	0.532	0.279	3.91231e-64	L5 PT ALM Npsr1	P08
Sel1l3	3.13376e-68	0.430536	0.774	0.539	1.13094e-63	L5 PT ALM Npsr1	P08
Rufy3	5.09979e-68	0.413492	0.898	0.758	1.84046e-63	L5 PT ALM Npsr1	P08
Sntg1	1.80986e-67	0.443984	0.969	0.923	6.53159e-63	L5 PT ALM Npsr1	P08
CT025619.1	2.63143e-67	0.312343	0.595	0.342	9.49657e-63	L5 PT ALM Npsr1	P08
Klf12	2.90374e-67	0.440807	0.779	0.548	1.04793e-62	L5 PT ALM Npsr1	P08
5530401A14Rik	4.01838e-67	0.314448	0.487	0.243	1.45019e-62	L5 PT ALM Npsr1	P08
Galnt7	6.09042e-67	0.432324	0.752	0.532	2.19797e-62	L5 PT ALM Npsr1	P08
Pkp4	5.12259e-66	0.452324	0.867	0.74	1.84869e-61	L5 PT ALM Npsr1	P08
Zfp618	5.43134e-66	0.32142	0.44	0.207	1.96012e-61	L5 PT ALM Npsr1	P08
Nsd2	5.8133e-66	0.315334	0.622	0.37	2.09796e-61	L5 PT ALM Npsr1	P08
Rxfp1	6.80737e-66	0.298309	0.712	0.458	2.45671e-61	L5 PT ALM Npsr1	P08
Smc2	1.33585e-65	0.273711	0.343	0.137	4.82093e-61	L5 PT ALM Npsr1	P08
Fut8	4.97033e-65	0.426293	0.873	0.731	1.79374e-60	L5 PT ALM Npsr1	P08
Arntl	8.17706e-65	0.3912	0.726	0.485	2.95102e-60	L5 PT ALM Npsr1	P08
Mdfic	1.44143e-64	0.283429	0.194	0.047	5.20197e-60	L5 PT ALM Npsr1	P08
Lypd1	2.564e-64	0.449268	0.431	0.204	9.25321e-60	L5 PT ALM Npsr1	P08
Spats2l	2.84671e-64	0.293419	0.379	0.163	1.02735e-59	L5 PT ALM Npsr1	P08
Rnf180	3.6151e-64	0.33034	0.506	0.264	1.30465e-59	L5 PT ALM Npsr1	P08
Syndig1	7.46237e-64	0.41356	0.95	0.827	2.69309e-59	L5 PT ALM Npsr1	P08
St8sia1	8.40016e-64	0.299723	0.65	0.396	3.03153e-59	L5 PT ALM Npsr1	P08
Smpd3	1.18841e-63	0.255955	0.383	0.169	4.28884e-59	L5 PT ALM Npsr1	P08
Gsdme	1.64771e-63	0.307886	0.578	0.332	5.94642e-59	L5 PT ALM Npsr1	P08
Phyhipl	2.84521e-63	0.297908	0.532	0.288	1.02681e-58	L5 PT ALM Npsr1	P08
Grb10	3.17743e-63	0.264377	0.469	0.239	1.1467e-58	L5 PT ALM Npsr1	P08
Slc6a15	3.81233e-63	0.433599	0.799	0.611	1.37583e-58	L5 PT ALM Npsr1	P08
Zbtb7c	5.44314e-63	0.278916	0.288	0.102	1.96437e-58	L5 PT ALM Npsr1	P08
Hdgfl3	6.61288e-63	0.263868	0.545	0.309	2.38652e-58	L5 PT ALM Npsr1	P08
Tmem131l	7.55031e-62	0.251513	0.55	0.318	2.72483e-57	L5 PT ALM Npsr1	P08
Nexmif	1.04378e-61	0.278845	0.574	0.338	3.76689e-57	L5 PT ALM Npsr1	P08
Limch1	2.47961e-61	0.370839	0.426	0.205	8.94865e-57	L5 PT ALM Npsr1	P08
Tmem200a	4.95333e-61	0.422174	0.791	0.575	1.78761e-56	L5 PT ALM Npsr1	P08
Fbn1	9.46643e-61	0.250577	0.485	0.257	3.41634e-56	L5 PT ALM Npsr1	P08
Cntrl	1.18465e-60	0.296732	0.559	0.316	4.27528e-56	L5 PT ALM Npsr1	P08
Grm5	2.02228e-60	0.278679	0.998	0.996	7.29819e-56	L5 PT ALM Npsr1	P08
Cadm3	2.09389e-60	0.327857	0.699	0.457	7.55663e-56	L5 PT ALM Npsr1	P08
Msi2	2.69748e-60	0.331039	0.616	0.37	9.73492e-56	L5 PT ALM Npsr1	P08
Nsd3	5.50526e-60	0.323618	0.668	0.424	1.98679e-55	L5 PT ALM Npsr1	P08
2510009E07Rik	2.52045e-59	0.313725	0.631	0.387	9.09605e-55	L5 PT ALM Npsr1	P08
Hectd4	5.63786e-59	0.43912	0.677	0.438	2.03465e-54	L5 PT ALM Npsr1	P08
Dynlt1a	8.57744e-59	0.286339	0.346	0.147	3.09551e-54	L5 PT ALM Npsr1	P08
Lrrn3	3.31196e-58	0.409263	0.491	0.277	1.19525e-53	L5 PT ALM Npsr1	P08
Rfx3	4.94298e-58	0.391278	0.891	0.739	1.78387e-53	L5 PT ALM Npsr1	P08
Epha10	5.39265e-58	0.321288	0.576	0.337	1.94616e-53	L5 PT ALM Npsr1	P08
Apba2	6.02026e-58	0.368005	0.936	0.831	2.17265e-53	L5 PT ALM Npsr1	P08
Ncam1	6.7798e-58	0.290457	0.997	0.983	2.44676e-53	L5 PT ALM Npsr1	P08
Ccdc34	5.47622e-57	0.299623	0.512	0.281	1.97631e-52	L5 PT ALM Npsr1	P08
Sesn3	1.06898e-56	0.29166	0.488	0.263	3.85783e-52	L5 PT ALM Npsr1	P08
Hs6st2	2.63692e-56	0.41944	0.879	0.708	9.5164e-52	L5 PT ALM Npsr1	P08
Frmpd1	4.03916e-56	0.259556	0.427	0.215	1.45769e-51	L5 PT ALM Npsr1	P08
Dlg2	5.18086e-56	0.599724	0.765	0.56	1.86972e-51	L5 PT ALM Npsr1	P08
A230057D06Rik	1.20137e-55	0.42385	0.728	0.494	4.33562e-51	L5 PT ALM Npsr1	P08
Pvt1	2.31876e-55	0.356672	0.948	0.831	8.36819e-51	L5 PT ALM Npsr1	P08
AC149090.1	2.41319e-55	0.558577	0.647	0.413	8.70898e-51	L5 PT ALM Npsr1	P08
Cpne8	5.22854e-55	0.439149	0.721	0.525	1.88693e-50	L5 PT ALM Npsr1	P08
Mei4	6.37713e-55	0.384125	0.426	0.217	2.30144e-50	L5 PT ALM Npsr1	P08
Fat3	6.46937e-55	0.479098	0.988	0.929	2.33473e-50	L5 PT ALM Npsr1	P08
Cachd1	8.20243e-55	0.302382	0.249	0.087	2.96018e-50	L5 PT ALM Npsr1	P08
Il1rap	2.38986e-54	0.512097	0.494	0.297	8.62476e-50	L5 PT ALM Npsr1	P08
Thrb	5.62936e-54	0.313829	0.991	0.936	2.03158e-49	L5 PT ALM Npsr1	P08
Pced1b	2.54451e-53	0.315433	0.649	0.417	9.18287e-49	L5 PT ALM Npsr1	P08
Pak7	3.3508e-53	0.365146	0.942	0.876	1.20927e-48	L5 PT ALM Npsr1	P08
Clstn2	7.241e-53	0.487613	0.986	0.965	2.61321e-48	L5 PT ALM Npsr1	P08
Prex2	1.16741e-52	0.371854	0.426	0.219	4.21306e-48	L5 PT ALM Npsr1	P08
Pcsk2	2.46757e-52	0.387298	0.977	0.911	8.9052e-48	L5 PT ALM Npsr1	P08
Ccdc136	1.28022e-51	0.294595	0.632	0.404	4.62018e-47	L5 PT ALM Npsr1	P08
Gm2164	1.85837e-51	0.340747	0.623	0.416	6.70666e-47	L5 PT ALM Npsr1	P08
Pcsk6	2.15724e-51	0.325221	0.406	0.203	7.78526e-47	L5 PT ALM Npsr1	P08
Cdkl5	4.6367e-51	0.348556	0.885	0.732	1.67334e-46	L5 PT ALM Npsr1	P08
Pfkp	5.63603e-51	0.316577	0.978	0.954	2.03399e-46	L5 PT ALM Npsr1	P08
Epb41	5.67291e-51	0.292066	0.507	0.288	2.0473e-46	L5 PT ALM Npsr1	P08
Bace2	8.06988e-51	0.263998	0.191	0.057	2.91234e-46	L5 PT ALM Npsr1	P08
Dock9	8.246e-51	0.33587	0.949	0.897	2.9759e-46	L5 PT ALM Npsr1	P08
Tmem163	1.11095e-50	0.310298	0.932	0.792	4.00931e-46	L5 PT ALM Npsr1	P08
Ppp3ca	3.17188e-50	0.282268	0.992	0.971	1.1447e-45	L5 PT ALM Npsr1	P08
Raver2	3.73359e-50	0.341315	0.765	0.553	1.34741e-45	L5 PT ALM Npsr1	P08
Ptprz1	7.18628e-50	0.317592	0.564	0.343	2.59346e-45	L5 PT ALM Npsr1	P08
Mgat5	7.60294e-50	0.256206	0.623	0.4	2.74383e-45	L5 PT ALM Npsr1	P08
Arhgap42	1.29153e-49	0.252549	0.407	0.208	4.661e-45	L5 PT ALM Npsr1	P08
Frmpd3	1.72795e-49	0.315836	0.611	0.388	6.236e-45	L5 PT ALM Npsr1	P08
Wwp1	1.78725e-49	0.260121	0.585	0.364	6.45001e-45	L5 PT ALM Npsr1	P08
Ptn	3.48947e-49	0.262428	0.511	0.297	1.25931e-44	L5 PT ALM Npsr1	P08
Fgf13	1.20295e-48	0.455783	0.715	0.538	4.34131e-44	L5 PT ALM Npsr1	P08
Lhfpl3	2.82434e-48	0.462826	0.688	0.493	1.01928e-43	L5 PT ALM Npsr1	P08
Trabd2b	4.84083e-48	0.261581	0.106	0.024	1.74701e-43	L5 PT ALM Npsr1	P08
Vps54	5.5956e-48	0.312469	0.751	0.544	2.0194e-43	L5 PT ALM Npsr1	P08
Fat4	6.08182e-48	0.268647	0.551	0.335	2.19487e-43	L5 PT ALM Npsr1	P08
Kif13a	8.25698e-48	0.28385	0.55	0.334	2.97986e-43	L5 PT ALM Npsr1	P08
Alk	1.61672e-47	0.339531	0.253	0.102	5.83459e-43	L5 PT ALM Npsr1	P08
Mef2a	3.08447e-47	0.335994	0.824	0.658	1.11315e-42	L5 PT ALM Npsr1	P08
Uggt2	3.26951e-47	0.276721	0.693	0.476	1.17993e-42	L5 PT ALM Npsr1	P08
Plcl1	6.68736e-47	0.377222	0.555	0.341	2.4134e-42	L5 PT ALM Npsr1	P08
Gm26901	1.03253e-46	0.251555	0.441	0.241	3.72629e-42	L5 PT ALM Npsr1	P08
Dpp6	9.88848e-46	0.314103	0.983	0.967	3.56865e-41	L5 PT ALM Npsr1	P08
Nab1	1.54289e-45	0.284686	0.624	0.41	5.56813e-41	L5 PT ALM Npsr1	P08
Mgat4c	2.78956e-45	0.649229	0.881	0.778	1.00672e-40	L5 PT ALM Npsr1	P08
Smyd3	5.62175e-45	0.351668	0.893	0.777	2.02883e-40	L5 PT ALM Npsr1	P08
Sntb2	8.74026e-45	0.309111	0.613	0.404	3.15427e-40	L5 PT ALM Npsr1	P08
Gm11418	3.11149e-44	0.254065	0.494	0.291	1.1229e-39	L5 PT ALM Npsr1	P08
Sema6a	4.39359e-44	0.313131	0.798	0.602	1.5856e-39	L5 PT ALM Npsr1	P08
Spire1	5.96277e-44	0.313673	0.77	0.582	2.1519e-39	L5 PT ALM Npsr1	P08
Cep85l	6.11644e-44	0.254582	0.685	0.476	2.20736e-39	L5 PT ALM Npsr1	P08
Fam19a5	1.77043e-43	0.320987	0.787	0.597	6.3893e-39	L5 PT ALM Npsr1	P08
Me3	1.03325e-42	0.264714	0.773	0.575	3.72888e-38	L5 PT ALM Npsr1	P08
Atp2c1	2.47459e-42	0.303392	0.938	0.831	8.93055e-38	L5 PT ALM Npsr1	P08
Eps8	2.37551e-41	0.284811	0.717	0.516	8.573e-37	L5 PT ALM Npsr1	P08
Dgkh	2.97071e-41	0.269753	0.973	0.898	1.0721e-36	L5 PT ALM Npsr1	P08
Dnm3	4.36836e-41	0.327421	0.913	0.812	1.5765e-36	L5 PT ALM Npsr1	P08
Cdh10	6.38917e-41	0.404841	0.769	0.582	2.30579e-36	L5 PT ALM Npsr1	P08
Arl15	7.24058e-41	0.366795	0.97	0.896	2.61305e-36	L5 PT ALM Npsr1	P08
Tenm2	1.33195e-40	0.425409	0.993	0.992	4.80688e-36	L5 PT ALM Npsr1	P08
Atp8a1	2.34512e-40	0.306895	0.869	0.715	8.4633e-36	L5 PT ALM Npsr1	P08
Palld	6.34083e-39	0.273484	0.123	0.037	2.28834e-34	L5 PT ALM Npsr1	P08
Tuba1a	2.28329e-38	0.310421	0.753	0.58	8.24016e-34	L5 PT ALM Npsr1	P08
Wdr17	6.65816e-38	0.26569	0.717	0.526	2.40286e-33	L5 PT ALM Npsr1	P08
Alcam	1.51627e-37	0.419303	0.839	0.689	5.47205e-33	L5 PT ALM Npsr1	P08
Neto2	3.35842e-37	0.251922	0.627	0.434	1.21202e-32	L5 PT ALM Npsr1	P08
Maml2	4.18414e-37	0.330059	0.588	0.395	1.51002e-32	L5 PT ALM Npsr1	P08
Mical2	4.38451e-37	0.273992	0.882	0.734	1.58233e-32	L5 PT ALM Npsr1	P08
Ppp2r3a	5.37292e-36	0.255453	0.749	0.568	1.93903e-31	L5 PT ALM Npsr1	P08
Ppm1h	1.37964e-35	0.30638	0.85	0.707	4.97899e-31	L5 PT ALM Npsr1	P08
Mkl1	3.52013e-35	0.300239	0.811	0.664	1.27038e-30	L5 PT ALM Npsr1	P08
Pde10a	7.46698e-35	0.290201	0.871	0.73	2.69476e-30	L5 PT ALM Npsr1	P08
Gm28905	8.47698e-35	0.363011	0.652	0.474	3.05926e-30	L5 PT ALM Npsr1	P08
Fggy	5.20235e-34	0.284402	0.508	0.328	1.87747e-29	L5 PT ALM Npsr1	P08
Unc13b	5.8836e-34	0.286121	0.919	0.852	2.12333e-29	L5 PT ALM Npsr1	P08
Bcl11a	1.04661e-33	0.305337	0.851	0.719	3.7771e-29	L5 PT ALM Npsr1	P08
Las1l	1.29515e-33	0.275014	0.765	0.604	4.67406e-29	L5 PT ALM Npsr1	P08
Ambra1	1.55721e-33	0.26619	0.896	0.777	5.6198e-29	L5 PT ALM Npsr1	P08
Vcan	2.53865e-33	0.251959	0.699	0.519	9.16173e-29	L5 PT ALM Npsr1	P08
Fgf12	7.40789e-33	0.300566	0.987	0.972	2.67344e-28	L5 PT ALM Npsr1	P08
Cobl	9.23531e-33	0.259963	0.774	0.613	3.33293e-28	L5 PT ALM Npsr1	P08
Scn9a	1.04729e-32	0.255206	0.555	0.375	3.77956e-28	L5 PT ALM Npsr1	P08
Kansl1l	1.9836e-32	0.295935	0.629	0.461	7.15862e-28	L5 PT ALM Npsr1	P08
Kat6b	2.84605e-32	0.267229	0.821	0.678	1.02711e-27	L5 PT ALM Npsr1	P08
Kcnd2	4.05581e-32	0.268456	0.999	0.99	1.4637e-27	L5 PT ALM Npsr1	P08
Camk4	1.78933e-31	0.268409	0.907	0.802	6.4575e-27	L5 PT ALM Npsr1	P08
Atp5o	3.08265e-31	0.252066	0.727	0.56	1.1125e-26	L5 PT ALM Npsr1	P08
Grik2	7.61291e-31	0.272778	0.998	0.997	2.74742e-26	L5 PT ALM Npsr1	P08
Gria4	3.68838e-30	0.306231	0.827	0.689	1.3311e-25	L5 PT ALM Npsr1	P08
Tsc22d1	9.58022e-30	0.253942	0.892	0.786	3.45741e-25	L5 PT ALM Npsr1	P08
Tbc1d5	7.01876e-29	0.2555	0.916	0.817	2.533e-24	L5 PT ALM Npsr1	P08
Galnt14	3.71416e-26	0.255438	0.703	0.548	1.3404e-21	L5 PT ALM Npsr1	P08
2003-03-01	7.38865e-26	0.268158	0.415	0.266	2.66649e-21	L5 PT ALM Npsr1	P08
Cdh2	1.68659e-23	0.299383	0.85	0.801	6.08674e-19	L5 PT ALM Npsr1	P08
Ptprm	2.01341e-23	0.259739	0.413	0.271	7.2662e-19	L5 PT ALM Npsr1	P08
Zfp804a	3.90557e-22	0.312305	0.874	0.778	1.40948e-17	L5 PT ALM Npsr1	P08
Cdh7	2.21541e-21	0.306184	0.501	0.372	7.99519e-17	L5 PT ALM Npsr1	P08
AC121788.1	1.52581e-20	0.409045	0.293	0.176	5.50648e-16	L5 PT ALM Npsr1	P08
Adamts18	6.43856e-18	0.399858	0.483	0.426	2.32361e-13	L5 PT ALM Npsr1	P08
Foxp2	2.27131e-15	0.337115	0.698	0.586	8.19693e-11	L5 PT ALM Npsr1	P08
Ptprk	8.4143e-09	0.309339	0.815	0.762	0.000303664	L5 PT ALM Npsr1	P08
Dlg2.1	0	2.82743	0.496	0.061	0	L5 PT ALM Slco2a1	P21
St6galnac5	0	2.22352	0.778	0.268	0	L5 PT ALM Slco2a1	P21
9330162G02Rik	0	2.14942	0.494	0.061	0	L5 PT ALM Slco2a1	P21
Snhg14	0	2.06654	0.492	0.061	0	L5 PT ALM Slco2a1	P21
Gm26871	0	1.93391	0.481	0.057	0	L5 PT ALM Slco2a1	P21
Rian	0	1.85319	0.491	0.06	0	L5 PT ALM Slco2a1	P21
Gm17167	0	1.74771	0.476	0.058	0	L5 PT ALM Slco2a1	P21
Astn2	0	1.66303	0.97	0.812	0	L5 PT ALM Slco2a1	P21
Gm38073	0	1.44449	0.444	0.051	0	L5 PT ALM Slco2a1	P21
St6galnac3	0	1.40335	0.888	0.703	0	L5 PT ALM Slco2a1	P21
Gm2163	0	1.37464	0.432	0.056	0	L5 PT ALM Slco2a1	P21
Trerf1	0	1.36584	0.448	0.056	0	L5 PT ALM Slco2a1	P21
Cdh13	0	1.33349	0.92	0.537	0	L5 PT ALM Slco2a1	P21
Gm12394	0	1.3314	0.443	0.058	0	L5 PT ALM Slco2a1	P21
Gm44560	0	1.23111	0.439	0.055	0	L5 PT ALM Slco2a1	P21
Pde1a	0	1.21173	0.972	0.775	0	L5 PT ALM Slco2a1	P21
Cntn4	0	1.19894	0.979	0.808	0	L5 PT ALM Slco2a1	P21
Nfia	0	1.10608	0.921	0.623	0	L5 PT ALM Slco2a1	P21
Gm27247	0	1.09705	0.417	0.059	0	L5 PT ALM Slco2a1	P21
Cntnap5c	0	1.03252	0.663	0.303	0	L5 PT ALM Slco2a1	P21
Zswim6	0	0.973448	0.371	0.046	0	L5 PT ALM Slco2a1	P21
A330023F24Rik	0	0.968979	0.37	0.044	0	L5 PT ALM Slco2a1	P21
Whsc1l1	0	0.94889	0.375	0.046	0	L5 PT ALM Slco2a1	P21
Pigk	0	0.90892	0.662	0.437	0	L5 PT ALM Slco2a1	P21
Gm15800	0	0.872157	0.358	0.045	0	L5 PT ALM Slco2a1	P21
Gm4258	0	0.851466	0.345	0.042	0	L5 PT ALM Slco2a1	P21
A230103L15Rik	0	0.843874	0.347	0.044	0	L5 PT ALM Slco2a1	P21
Tmem132d	0	0.836173	0.929	0.787	0	L5 PT ALM Slco2a1	P21
Hecw2	0	0.690224	0.976	0.946	0	L5 PT ALM Slco2a1	P21
Cacnb4	0	0.665734	0.993	0.972	0	L5 PT ALM Slco2a1	P21
Sv2b	0	0.660176	0.954	0.852	0	L5 PT ALM Slco2a1	P21
Gm28928	0	0.633842	1	0.999	0	L5 PT ALM Slco2a1	P21
Opcml	0	0.632935	1	1	0	L5 PT ALM Slco2a1	P21
Nav3	0	0.587842	0.999	0.993	0	L5 PT ALM Slco2a1	P21
Nrxn3	0	0.453216	1	0.999	0	L5 PT ALM Slco2a1	P21
Dlgap1	0	0.396922	0.999	0.999	0	L5 PT ALM Slco2a1	P21
Spag5	6.91691904177745e-323	1.04434	0.365	0.06	2.49624691298706e-318	L5 PT ALM Slco2a1	P21
Zeb2	8.64614880222181e-322	0.80044	0.897	0.7	3.12030864123383e-317	L5 PT ALM Slco2a1	P21
Grid1	3.86782522036144e-316	0.627714	0.95	0.854	1.39585944377624e-311	L5 PT ALM Slco2a1	P21
Grid2	1.63765328302315e-313	0.540683	0.997	0.974	0	L5 PT ALM Slco2a1	P21
2610203C20Rik	2.46849088128187e-313	0.811833	0.329	0.041	0	L5 PT ALM Slco2a1	P21
Necab1	9.20317687237388e-310	0.830849	0.529	0.219	3.32133e-305	L5 PT ALM Slco2a1	P21
A930011G23Rik	0	0.768629	0.267	0.016	2.02834e-304	L5 PT ALM Slco2a1	P21
Mir99ahg	1.00382e-307	0.851003	0.329	0.043	3.62269e-303	L5 PT ALM Slco2a1	P21
Prr16	4.16636e-303	0.861192	0.82	0.633	1.5036e-298	L5 PT ALM Slco2a1	P21
Grik4	6.14236e-299	0.811968	0.568	0.258	2.21672e-294	L5 PT ALM Slco2a1	P21
Pcdh7	4.2998e-298	0.481959	0.996	0.979	1.55175e-293	L5 PT ALM Slco2a1	P21
Gm44562	2.81162e-296	0.777581	0.32	0.042	1.01469e-291	L5 PT ALM Slco2a1	P21
Zfp804b	1.70892e-291	0.934878	0.775	0.471	6.16733e-287	L5 PT ALM Slco2a1	P21
Nrg3	1.11351e-290	0.336812	1	1	4.01855e-286	L5 PT ALM Slco2a1	P21
A330076H08Rik	4.59703e-285	0.728297	0.319	0.046	1.65902e-280	L5 PT ALM Slco2a1	P21
Gm1043	2.83811e-284	0.715348	0.291	0.032	1.02424e-279	L5 PT ALM Slco2a1	P21
Fras1	9.39966e-278	0.783164	0.781	0.534	3.39224e-273	L5 PT ALM Slco2a1	P21
Tmeff1	7.07948e-276	0.708127	0.6	0.321	2.55491e-271	L5 PT ALM Slco2a1	P21
Sgcz	5.3464e-269	0.44825	1	0.997	1.92946e-264	L5 PT ALM Slco2a1	P21
Grm8	2.134e-264	0.617469	0.957	0.887	7.7014e-260	L5 PT ALM Slco2a1	P21
Gm37899	5.37917e-263	0.646865	0.277	0.032	1.94129e-258	L5 PT ALM Slco2a1	P21
2210408F21Rik	5.12146e-259	0.695785	0.295	0.042	1.84828e-254	L5 PT ALM Slco2a1	P21
Ccdc64	9.59769e-257	0.626179	0.276	0.033	3.46371e-252	L5 PT ALM Slco2a1	P21
Nfib	3.05946e-250	0.457401	0.99	0.967	1.10413e-245	L5 PT ALM Slco2a1	P21
Cntn1	5.24911e-241	0.533674	0.966	0.915	1.89435e-236	L5 PT ALM Slco2a1	P21
RP24-274B19.1	9.41151e-239	0.603149	0.276	0.04	3.39652e-234	L5 PT ALM Slco2a1	P21
Plxna4	8.7846e-235	0.625217	0.892	0.786	3.17028e-230	L5 PT ALM Slco2a1	P21
Dpp10	1.25866e-230	0.402617	0.997	0.991	4.54239e-226	L5 PT ALM Slco2a1	P21
Kcnj3	2.32924e-230	0.67882	0.884	0.776	8.40598e-226	L5 PT ALM Slco2a1	P21
Dok6	7.85758e-230	0.577062	0.944	0.879	2.83572e-225	L5 PT ALM Slco2a1	P21
Man1a	3.30312e-222	0.678506	0.681	0.429	1.19206e-217	L5 PT ALM Slco2a1	P21
Mgat4c	2.41201e-221	0.839015	0.74	0.526	8.7047e-217	L5 PT ALM Slco2a1	P21
Pid1	6.08584e-218	0.663945	0.785	0.589	2.19632e-213	L5 PT ALM Slco2a1	P21
Dleu2	1.91409e-217	0.573206	0.246	0.032	6.90774e-213	L5 PT ALM Slco2a1	P21
Gm16432	1.68979e-214	0.581528	0.248	0.035	6.09827e-210	L5 PT ALM Slco2a1	P21
4930578G10Rik	7.32278e-212	0.523297	0.232	0.029	2.64272e-207	L5 PT ALM Slco2a1	P21
RP24-349L11.1	2.56147e-211	0.520554	0.222	0.024	9.24408e-207	L5 PT ALM Slco2a1	P21
Zcchc16	3.17461e-210	0.662033	0.229	0.027	1.14568e-205	L5 PT ALM Slco2a1	P21
Htr1f	5.07249e-210	0.567718	0.96	0.893	1.83061e-205	L5 PT ALM Slco2a1	P21
Gm42616	4.93777e-209	0.497594	0.232	0.029	1.78199e-204	L5 PT ALM Slco2a1	P21
Tmem181b-ps	3.77256e-208	0.540296	0.244	0.034	1.36148e-203	L5 PT ALM Slco2a1	P21
RP24-263E2.3	3.06513e-207	0.523272	0.243	0.034	1.10618e-202	L5 PT ALM Slco2a1	P21
Celf4	6.78873e-207	0.606049	0.907	0.794	2.44999e-202	L5 PT ALM Slco2a1	P21
Ncam2	1.75406e-205	0.489749	0.993	0.972	6.33021e-201	L5 PT ALM Slco2a1	P21
Pde4d	2.51408e-203	0.348077	0.999	0.997	9.07307e-199	L5 PT ALM Slco2a1	P21
Rfwd2	3.21816e-203	0.502658	0.232	0.03	1.1614e-198	L5 PT ALM Slco2a1	P21
Gm44559	5.65211e-202	0.512575	0.236	0.033	2.03979e-197	L5 PT ALM Slco2a1	P21
2610005L07Rik	1.21607e-200	0.46024	0.221	0.027	4.38866e-196	L5 PT ALM Slco2a1	P21
Slc35f1	1.27421e-200	0.727702	0.767	0.578	4.59849e-196	L5 PT ALM Slco2a1	P21
Gm10649	9.01319e-197	0.575768	0.238	0.036	3.25277e-192	L5 PT ALM Slco2a1	P21
Dpyd	1.99532e-196	0.689516	0.54	0.287	7.20091e-192	L5 PT ALM Slco2a1	P21
Ptpre	3.07693e-196	0.590104	0.678	0.459	1.11043e-191	L5 PT ALM Slco2a1	P21
RP23-331E5.5	9.84004e-195	0.487984	0.226	0.03	3.55117e-190	L5 PT ALM Slco2a1	P21
Tox	4.07033e-192	0.460227	0.976	0.883	1.46894e-187	L5 PT ALM Slco2a1	P21
Fam134b	3.87573e-191	0.453446	0.2	0.02	1.39871e-186	L5 PT ALM Slco2a1	P21
Bre	1.00286e-190	0.485717	0.218	0.028	3.61922e-186	L5 PT ALM Slco2a1	P21
Gucy1b3	4.61686e-189	0.496104	0.224	0.032	1.66618e-184	L5 PT ALM Slco2a1	P21
Erdr1	1.87035e-188	0.487223	0.214	0.027	6.74991e-184	L5 PT ALM Slco2a1	P21
Crym	5.60149e-188	0.520439	0.4	0.163	2.02152e-183	L5 PT ALM Slco2a1	P21
Gm10125	2.72561e-186	0.506642	0.218	0.03	9.83644e-182	L5 PT ALM Slco2a1	P21
Gm20417	3.17532e-186	0.45572	0.209	0.026	1.14594e-181	L5 PT ALM Slco2a1	P21
Hs3st2	9.42007e-186	0.556298	0.822	0.694	3.39961e-181	L5 PT ALM Slco2a1	P21
Gm26804	2.11574e-185	0.568434	0.301	0.093	7.63549e-181	L5 PT ALM Slco2a1	P21
Cacna2d1	3.94382e-185	0.472793	0.946	0.913	1.42328e-180	L5 PT ALM Slco2a1	P21
Gm43174	1.97764e-183	0.479258	0.217	0.03	7.13709e-179	L5 PT ALM Slco2a1	P21
Cdh6	5.89087e-183	0.551897	0.848	0.687	2.12596e-178	L5 PT ALM Slco2a1	P21
Fam63b	2.40919e-181	0.427948	0.192	0.02	8.69454e-177	L5 PT ALM Slco2a1	P21
Gbas	1.91726e-179	0.413602	0.194	0.022	6.91922e-175	L5 PT ALM Slco2a1	P21
Luzp2	6.34044e-176	0.759252	0.724	0.534	2.2882e-171	L5 PT ALM Slco2a1	P21
Slmo1	1.82559e-175	0.417132	0.199	0.025	6.58837e-171	L5 PT ALM Slco2a1	P21
Mia2.1	3.67768e-174	0.454907	0.209	0.03	1.32724e-169	L5 PT ALM Slco2a1	P21
Fam178a	4.26175e-174	0.43023	0.204	0.028	1.53802e-169	L5 PT ALM Slco2a1	P21
Whsc1	1.48804e-173	0.445169	0.207	0.029	5.3702e-169	L5 PT ALM Slco2a1	P21
6820431F20Rik	8.61937e-171	0.410893	0.192	0.023	3.11064e-166	L5 PT ALM Slco2a1	P21
Pcsk2	4.00229e-169	0.447043	0.977	0.957	1.44438e-164	L5 PT ALM Slco2a1	P21
Rapgef5	1.51073e-168	0.407055	0.98	0.939	5.45208e-164	L5 PT ALM Slco2a1	P21
Ppm1l	6.033e-168	0.461391	0.936	0.887	2.17725e-163	L5 PT ALM Slco2a1	P21
Fam135b	3.16089e-166	0.442445	0.975	0.943	1.14073e-161	L5 PT ALM Slco2a1	P21
Ephb1	4.7599e-166	0.543186	0.784	0.645	1.7178e-161	L5 PT ALM Slco2a1	P21
Enox1	7.36829e-165	0.51195	0.908	0.86	2.65914e-160	L5 PT ALM Slco2a1	P21
Cacna1e	4.32871e-163	0.4396	0.96	0.934	1.56219e-158	L5 PT ALM Slco2a1	P21
Apba1	7.66538e-163	0.505962	0.868	0.796	2.76636e-158	L5 PT ALM Slco2a1	P21
Mpped2	7.26289e-162	0.591929	0.706	0.512	2.6211e-157	L5 PT ALM Slco2a1	P21
Kcnq1	5.1714e-160	0.433806	0.218	0.044	1.86631e-155	L5 PT ALM Slco2a1	P21
4632427E13Rik	5.89483e-159	0.41567	0.193	0.028	2.12739e-154	L5 PT ALM Slco2a1	P21
Nkain2	3.61612e-158	0.280797	1	0.998	1.30502e-153	L5 PT ALM Slco2a1	P21
C77370	1.42051e-157	0.400675	0.179	0.022	5.12648e-153	L5 PT ALM Slco2a1	P21
Gria1	7.43678e-157	0.478403	0.953	0.882	2.68386e-152	L5 PT ALM Slco2a1	P21
Ssbp2	1.45686e-156	0.419658	0.965	0.934	5.25767e-152	L5 PT ALM Slco2a1	P21
Far2	1.57853e-155	0.519346	0.669	0.508	5.69674e-151	L5 PT ALM Slco2a1	P21
Gm14306	1.95178e-155	0.384788	0.182	0.024	7.04377e-151	L5 PT ALM Slco2a1	P21
Ano3	1.08093e-154	0.600665	0.751	0.564	3.90098e-150	L5 PT ALM Slco2a1	P21
Bzrap1	1.17893e-154	0.366445	0.173	0.02	4.25465e-150	L5 PT ALM Slco2a1	P21
Snca	1.34907e-154	0.546323	0.58	0.405	4.86864e-150	L5 PT ALM Slco2a1	P21
Sox2ot	4.57465e-154	0.459351	0.17	0.019	1.65095e-149	L5 PT ALM Slco2a1	P21
Gm14172	1.09264e-153	0.373755	0.169	0.019	3.94324e-149	L5 PT ALM Slco2a1	P21
Ext1	9.26095e-152	0.400376	0.978	0.944	3.34218e-147	L5 PT ALM Slco2a1	P21
Gm43175	1.43207e-151	0.363776	0.181	0.025	5.16821e-147	L5 PT ALM Slco2a1	P21
Fam65b	3.33573e-151	0.40081	0.173	0.021	1.20383e-146	L5 PT ALM Slco2a1	P21
B3galt1	6.30668e-151	0.408283	0.958	0.905	2.27602e-146	L5 PT ALM Slco2a1	P21
Kcnd2	9.32378e-151	0.399294	0.994	0.989	3.36486e-146	L5 PT ALM Slco2a1	P21
Hdgfrp3	1.29003e-149	0.373129	0.173	0.022	4.6556e-145	L5 PT ALM Slco2a1	P21
Kcnt2	7.36245e-149	0.533957	0.769	0.575	2.65704e-144	L5 PT ALM Slco2a1	P21
Xylt1	1.01135e-148	0.459948	0.899	0.762	3.64986e-144	L5 PT ALM Slco2a1	P21
Pex5l	9.61823e-148	0.251822	1	0.998	3.47112e-143	L5 PT ALM Slco2a1	P21
Khdrbs3	3.19762e-147	0.353023	0.987	0.957	1.15399e-142	L5 PT ALM Slco2a1	P21
Diaph2	1.65599e-145	0.434165	0.903	0.849	5.9763e-141	L5 PT ALM Slco2a1	P21
Gm28153	8.52199e-145	0.477366	0.214	0.049	3.0755e-140	L5 PT ALM Slco2a1	P21
Fstl5	9.08161e-145	0.584183	0.706	0.528	3.27746e-140	L5 PT ALM Slco2a1	P21
Gabrb1	1.77776e-143	0.533848	0.899	0.818	6.41574e-139	L5 PT ALM Slco2a1	P21
Lnpk1	4.83764e-143	0.340598	0.17	0.023	1.74586e-138	L5 PT ALM Slco2a1	P21
Lgi1	1.31044e-142	0.489906	0.619	0.436	4.72923e-138	L5 PT ALM Slco2a1	P21
Ndst3	8.80897e-140	0.527917	0.871	0.735	3.17907e-135	L5 PT ALM Slco2a1	P21
Gm44742	8.88418e-139	0.347794	0.162	0.02	3.20621e-134	L5 PT ALM Slco2a1	P21
Fhod3	2.47956e-137	0.464487	0.805	0.689	8.94848e-133	L5 PT ALM Slco2a1	P21
Sema6d	6.85172e-137	0.503752	0.927	0.825	2.47272e-132	L5 PT ALM Slco2a1	P21
Igsf21	7.78821e-136	0.513502	0.755	0.584	2.81069e-131	L5 PT ALM Slco2a1	P21
RP23-54G8.4	1.13687e-135	0.373602	0.184	0.032	4.10287e-131	L5 PT ALM Slco2a1	P21
Wbscr17	3.25385e-135	0.298219	0.184	0.041	1.17428e-130	L5 PT ALM Slco2a1	P21
Lace1	8.6705e-134	0.354405	0.162	0.022	3.1291e-129	L5 PT ALM Slco2a1	P21
Stxbp5l	1.00557e-132	0.425786	0.954	0.925	3.629e-128	L5 PT ALM Slco2a1	P21
Grip1	4.25734e-131	0.456693	0.916	0.823	1.53643e-126	L5 PT ALM Slco2a1	P21
Plekha2	4.48591e-131	0.272608	0.139	0.015	1.61892e-126	L5 PT ALM Slco2a1	P21
1110037F02Rik	4.32157e-130	0.310905	0.149	0.018	1.55961e-125	L5 PT ALM Slco2a1	P21
Dfna5	8.40822e-130	0.336098	0.167	0.026	3.03444e-125	L5 PT ALM Slco2a1	P21
Dmd	3.87255e-129	0.34668	0.977	0.895	1.39756e-124	L5 PT ALM Slco2a1	P21
9430020K01Rik	6.93674e-128	0.314289	0.148	0.018	2.5034e-123	L5 PT ALM Slco2a1	P21
Adgrl3	1.70415e-127	0.308716	0.996	0.989	6.1501e-123	L5 PT ALM Slco2a1	P21
Gm43606	5.54114e-126	0.300061	0.149	0.019	1.99974e-121	L5 PT ALM Slco2a1	P21
Gm44829	2.07067e-125	0.280816	0.132	0.013	7.47285e-121	L5 PT ALM Slco2a1	P21
Nrcam	6.20566e-125	0.316524	0.989	0.973	2.23956e-120	L5 PT ALM Slco2a1	P21
Nckap5	8.07522e-125	0.475448	0.39	0.23	2.91426e-120	L5 PT ALM Slco2a1	P21
CAAA01180111.2	1.51137e-121	0.282622	0.135	0.015	5.45439e-117	L5 PT ALM Slco2a1	P21
Fam179b	5.47536e-121	0.294783	0.143	0.018	1.976e-116	L5 PT ALM Slco2a1	P21
Trim30a	8.35924e-121	0.386659	0.213	0.06	3.01677e-116	L5 PT ALM Slco2a1	P21
Vsnl1	9.44799e-121	0.379197	0.911	0.857	3.40969e-116	L5 PT ALM Slco2a1	P21
Lyrm4	1.01659e-120	0.435795	0.268	0.113	3.66879e-116	L5 PT ALM Slco2a1	P21
Epo	3.68437e-120	0.346007	0.178	0.038	1.32965e-115	L5 PT ALM Slco2a1	P21
Blnk	4.66927e-120	0.315506	0.178	0.04	1.68509e-115	L5 PT ALM Slco2a1	P21
Gm21989	1.44172e-119	0.28311	0.131	0.014	5.20303e-115	L5 PT ALM Slco2a1	P21
Large1	1.67954e-119	0.323574	0.987	0.971	6.06129e-115	L5 PT ALM Slco2a1	P21
Cntn6	2.24955e-119	0.563211	0.791	0.629	8.11841e-115	L5 PT ALM Slco2a1	P21
Ppm1e	2.22049e-118	0.304941	0.99	0.981	8.01353e-114	L5 PT ALM Slco2a1	P21
RP24-250L13.2	6.77202e-118	0.31128	0.136	0.016	2.44395e-113	L5 PT ALM Slco2a1	P21
Dscaml1	9.04127e-118	0.379018	0.95	0.858	3.2629e-113	L5 PT ALM Slco2a1	P21
Cacna2d3	1.93855e-117	0.267305	0.997	0.988	6.99602e-113	L5 PT ALM Slco2a1	P21
Tssc1	8.59229e-117	0.298829	0.147	0.021	3.10087e-112	L5 PT ALM Slco2a1	P21
Gltscr1l	1.9073e-116	0.310052	0.151	0.023	6.88325e-112	L5 PT ALM Slco2a1	P21
D930015E06Rik	3.23264e-116	0.318841	0.151	0.023	1.16663e-111	L5 PT ALM Slco2a1	P21
Plekha7	6.58373e-116	0.404373	0.35	0.188	2.376e-111	L5 PT ALM Slco2a1	P21
BC030336	5.99489e-115	0.277369	0.13	0.015	2.1635e-110	L5 PT ALM Slco2a1	P21
Neto1	6.38513e-115	0.403999	0.884	0.827	2.30433e-110	L5 PT ALM Slco2a1	P21
Alcam	1.07026e-113	0.492186	0.55	0.359	3.86247e-109	L5 PT ALM Slco2a1	P21
Smek2	4.30689e-111	0.253826	0.124	0.013	1.55431e-106	L5 PT ALM Slco2a1	P21
Thrb	9.79337e-111	0.345427	0.984	0.956	3.53433e-106	L5 PT ALM Slco2a1	P21
Clmp	5.99462e-110	0.41956	0.301	0.139	2.1634e-105	L5 PT ALM Slco2a1	P21
AI846148	3.64173e-109	0.259492	0.124	0.014	1.31426e-104	L5 PT ALM Slco2a1	P21
Ptprg	3.38614e-108	0.38314	0.924	0.844	1.22203e-103	L5 PT ALM Slco2a1	P21
Pde4b	4.27093e-107	0.414092	0.92	0.82	1.54133e-102	L5 PT ALM Slco2a1	P21
Kcnmb4	6.78821e-107	0.38646	0.529	0.409	2.4498e-102	L5 PT ALM Slco2a1	P21
Fah	7.36389e-107	0.330549	0.176	0.051	2.65756e-102	L5 PT ALM Slco2a1	P21
Rimbp2	9.2053e-107	0.386337	0.879	0.828	3.3221e-102	L5 PT ALM Slco2a1	P21
1810026B05Rik	1.11705e-106	0.250623	0.122	0.014	4.03133e-102	L5 PT ALM Slco2a1	P21
L3mbtl4	2.6198e-105	0.523315	0.512	0.408	9.45461e-101	L5 PT ALM Slco2a1	P21
Atrnl1	6.71146e-103	0.351835	0.968	0.939	2.4221e-98	L5 PT ALM Slco2a1	P21
Adcy1	6.828e-103	0.385945	0.779	0.688	2.46416e-98	L5 PT ALM Slco2a1	P21
Fam21	2.87939e-99	0.255555	0.119	0.015	1.03914e-94	L5 PT ALM Slco2a1	P21
Hs3st5	3.92617e-99	0.479955	0.614	0.473	1.41692e-94	L5 PT ALM Slco2a1	P21
Gm11906	6.71498e-99	0.269282	0.122	0.016	2.42337e-94	L5 PT ALM Slco2a1	P21
Clstn2	6.79109e-99	0.371111	0.938	0.887	2.45084e-94	L5 PT ALM Slco2a1	P21
Hs3st4	1.35857e-98	0.474123	0.354	0.199	4.90293e-94	L5 PT ALM Slco2a1	P21
Qk	2.49238e-98	0.368351	0.453	0.333	8.99474e-94	L5 PT ALM Slco2a1	P21
1700123O21Rik	3.59056e-98	0.250094	0.132	0.022	1.2958e-93	L5 PT ALM Slco2a1	P21
Cntnap4	2.28985e-96	0.374994	0.254	0.114	8.26384e-92	L5 PT ALM Slco2a1	P21
Gm44511	3.105e-96	0.326827	0.23	0.122	1.12056e-91	L5 PT ALM Slco2a1	P21
Epha7	6.4373e-96	0.403432	0.747	0.667	2.32316e-91	L5 PT ALM Slco2a1	P21
Rnf217	2.44343e-95	0.384141	0.542	0.41	8.81808e-91	L5 PT ALM Slco2a1	P21
Grm3	4.18548e-95	0.424296	0.735	0.611	1.5105e-90	L5 PT ALM Slco2a1	P21
Dner	1.28019e-94	0.429294	0.4	0.247	4.62009e-90	L5 PT ALM Slco2a1	P21
Gabra2	8.63448e-91	0.379608	0.693	0.599	3.1161e-86	L5 PT ALM Slco2a1	P21
Mctp1	7.91958e-90	0.42689	0.754	0.653	2.8581e-85	L5 PT ALM Slco2a1	P21
Tenm4	4.99109e-88	0.311534	0.954	0.922	1.80123e-83	L5 PT ALM Slco2a1	P21
Kcnd3	1.36808e-87	0.428958	0.504	0.373	4.93725e-83	L5 PT ALM Slco2a1	P21
Prickle2	1.85344e-87	0.273008	0.978	0.942	6.6889e-83	L5 PT ALM Slco2a1	P21
Pip5k1b	7.99174e-87	0.404582	0.441	0.281	2.88414e-82	L5 PT ALM Slco2a1	P21
Slc4a10	9.83401e-87	0.354004	0.805	0.74	3.549e-82	L5 PT ALM Slco2a1	P21
Jph1	7.42983e-86	0.362435	0.605	0.491	2.68135e-81	L5 PT ALM Slco2a1	P21
Kcnq3	6.39057e-85	0.312007	0.975	0.957	2.30629e-80	L5 PT ALM Slco2a1	P21
Stxbp5	1.13672e-84	0.337017	0.731	0.644	4.10229e-80	L5 PT ALM Slco2a1	P21
Arhgap15	1.50077e-84	0.428748	0.518	0.347	5.41612e-80	L5 PT ALM Slco2a1	P21
Zbtb16	2.56644e-83	0.367727	0.831	0.763	9.26204e-79	L5 PT ALM Slco2a1	P21
Kcnk10	1.93568e-79	0.370904	0.529	0.411	6.98567e-75	L5 PT ALM Slco2a1	P21
Sltm	3.76619e-79	0.328399	0.781	0.729	1.35918e-74	L5 PT ALM Slco2a1	P21
Pde4a	4.94271e-79	0.33259	0.845	0.788	1.78377e-74	L5 PT ALM Slco2a1	P21
Mmp16	4.98675e-79	0.354096	0.695	0.598	1.79967e-74	L5 PT ALM Slco2a1	P21
Ccdc171	1.36774e-78	0.337	0.319	0.189	4.93605e-74	L5 PT ALM Slco2a1	P21
Syn3	1.69619e-78	0.388993	0.501	0.385	6.12137e-74	L5 PT ALM Slco2a1	P21
Pcdh17	3.17742e-77	0.346196	0.425	0.319	1.1467e-72	L5 PT ALM Slco2a1	P21
Crim1	3.62333e-76	0.379889	0.506	0.427	1.30762e-71	L5 PT ALM Slco2a1	P21
Nt5dc3	4.27709e-76	0.306232	0.248	0.146	1.54356e-71	L5 PT ALM Slco2a1	P21
Caln1	7.3054e-76	0.401996	0.798	0.739	2.63644e-71	L5 PT ALM Slco2a1	P21
Pak7	8.19483e-75	0.381012	0.788	0.71	2.95743e-70	L5 PT ALM Slco2a1	P21
Syn2	1.23574e-73	0.319726	0.824	0.774	4.45966e-69	L5 PT ALM Slco2a1	P21
Plcxd3	1.49845e-73	0.34505	0.29	0.159	5.40775e-69	L5 PT ALM Slco2a1	P21
Map3k5	2.21976e-73	0.317103	0.623	0.545	8.01089e-69	L5 PT ALM Slco2a1	P21
Cckbr	6.93563e-73	0.315121	0.345	0.229	2.503e-68	L5 PT ALM Slco2a1	P21
Foxp1	7.28838e-73	0.314883	0.858	0.775	2.6303e-68	L5 PT ALM Slco2a1	P21
Ntrk3	1.06053e-72	0.287284	0.957	0.93	3.82736e-68	L5 PT ALM Slco2a1	P21
Mpdz	1.33086e-72	0.31049	0.483	0.383	4.80293e-68	L5 PT ALM Slco2a1	P21
Vps13b	2.00313e-72	0.293498	0.894	0.86	7.2291e-68	L5 PT ALM Slco2a1	P21
Antxr1	6.37557e-71	0.281573	0.22	0.095	2.30088e-66	L5 PT ALM Slco2a1	P21
4732471J01Rik	6.4449e-71	0.325414	0.658	0.596	2.3259e-66	L5 PT ALM Slco2a1	P21
Lsamp	1.55465e-69	0.91972	0.913	0.942	5.61056e-65	L5 PT ALM Slco2a1	P21
Khdrbs2	2.7513e-69	0.273581	0.981	0.949	9.92918e-65	L5 PT ALM Slco2a1	P21
Cog5	2.4919e-68	0.299312	0.733	0.677	8.99301e-64	L5 PT ALM Slco2a1	P21
Fam19a2	2.98821e-67	0.399484	0.756	0.706	1.07842e-62	L5 PT ALM Slco2a1	P21
Htr4	5.71353e-67	0.284943	0.186	0.092	2.06195e-62	L5 PT ALM Slco2a1	P21
Dok5	1.71471e-66	0.277269	0.379	0.294	6.18821e-62	L5 PT ALM Slco2a1	P21
Amph	5.2141e-66	0.280229	0.907	0.86	1.88172e-61	L5 PT ALM Slco2a1	P21
Tlk1	1.28821e-65	0.283711	0.604	0.535	4.64901e-61	L5 PT ALM Slco2a1	P21
Lmo3	1.74874e-65	0.327651	0.57	0.46	6.31103e-61	L5 PT ALM Slco2a1	P21
Diaph3	2.41678e-65	0.262496	0.187	0.086	8.72191e-61	L5 PT ALM Slco2a1	P21
Scn2a	6.92847e-65	0.298014	0.818	0.759	2.50042e-60	L5 PT ALM Slco2a1	P21
Add3	8.86566e-65	0.291437	0.379	0.27	3.19953e-60	L5 PT ALM Slco2a1	P21
Adcy9	1.44506e-64	0.297114	0.762	0.698	5.21508e-60	L5 PT ALM Slco2a1	P21
Hdac9	3.48725e-64	0.272809	0.966	0.942	1.25851e-59	L5 PT ALM Slco2a1	P21
Chrna7	4.33811e-64	0.340955	0.46	0.347	1.56558e-59	L5 PT ALM Slco2a1	P21
Epha10	4.43673e-64	0.336782	0.66	0.577	1.60117e-59	L5 PT ALM Slco2a1	P21
Npas2	1.16438e-63	0.320911	0.813	0.748	4.20212e-59	L5 PT ALM Slco2a1	P21
Mmp17	1.27287e-63	0.302933	0.457	0.354	4.59365e-59	L5 PT ALM Slco2a1	P21
C130071C03Rik	1.40206e-63	0.288771	0.837	0.79	5.05991e-59	L5 PT ALM Slco2a1	P21
Fmn2	2.96071e-62	0.28043	0.862	0.816	1.06849e-57	L5 PT ALM Slco2a1	P21
Kcnh1	5.96018e-62	0.31629	0.616	0.487	2.15097e-57	L5 PT ALM Slco2a1	P21
Meis2	2.06063e-61	0.336368	0.813	0.718	7.43659e-57	L5 PT ALM Slco2a1	P21
Sdk2	5.22215e-61	0.327843	0.801	0.715	1.88462e-56	L5 PT ALM Slco2a1	P21
Mfsd4a	5.26322e-61	0.288122	0.556	0.485	1.89944e-56	L5 PT ALM Slco2a1	P21
5031425E22Rik	6.73457e-61	0.286591	0.706	0.661	2.43044e-56	L5 PT ALM Slco2a1	P21
Adamts18	8.84083e-61	0.334571	0.317	0.197	3.19057e-56	L5 PT ALM Slco2a1	P21
3110035E14Rik	6.93889e-60	0.254893	0.453	0.375	2.50418e-55	L5 PT ALM Slco2a1	P21
Cntfr	9.4403e-60	0.307911	0.481	0.405	3.40691e-55	L5 PT ALM Slco2a1	P21
Syt16	2.4226e-59	0.320824	0.671	0.586	8.74293e-55	L5 PT ALM Slco2a1	P21
Mad1l1	1.25533e-58	0.264989	0.403	0.351	4.53035e-54	L5 PT ALM Slco2a1	P21
Nr4a3	9.49317e-58	0.266758	0.201	0.105	3.42599e-53	L5 PT ALM Slco2a1	P21
Gdpd5	1.01787e-57	0.271663	0.36	0.27	3.67339e-53	L5 PT ALM Slco2a1	P21
Gng12	2.33882e-57	0.27267	0.512	0.438	8.44056e-53	L5 PT ALM Slco2a1	P21
Smap1	3.3536e-57	0.261362	0.684	0.636	1.21028e-52	L5 PT ALM Slco2a1	P21
Ptprr	9.0003e-57	0.275776	0.615	0.566	3.24812e-52	L5 PT ALM Slco2a1	P21
Fmnl2	1.0229e-56	0.289264	0.663	0.606	3.69154e-52	L5 PT ALM Slco2a1	P21
Cdh11	3.68101e-56	0.32054	0.757	0.677	1.32844e-51	L5 PT ALM Slco2a1	P21
Frmd3	7.26527e-56	0.26133	0.33	0.241	2.62196e-51	L5 PT ALM Slco2a1	P21
Plekhg5	6.99268e-54	0.254466	0.569	0.514	2.52359e-49	L5 PT ALM Slco2a1	P21
Dgkb	1.60537e-53	0.304286	0.835	0.754	5.79362e-49	L5 PT ALM Slco2a1	P21
Zdhhc14	4.29169e-53	0.30348	0.607	0.517	1.54883e-48	L5 PT ALM Slco2a1	P21
Spink10	1.27044e-52	0.262574	0.603	0.547	4.58488e-48	L5 PT ALM Slco2a1	P21
2011-03-01	2.37517e-52	0.27343	0.774	0.726	8.57176e-48	L5 PT ALM Slco2a1	P21
Dtnb	7.42929e-52	0.254849	0.695	0.641	2.68115e-47	L5 PT ALM Slco2a1	P21
Klhl1	8.17269e-52	0.341953	0.608	0.503	2.94944e-47	L5 PT ALM Slco2a1	P21
Zswim5	5.60661e-51	0.268788	0.403	0.325	2.02337e-46	L5 PT ALM Slco2a1	P21
Jazf1	6.16216e-51	0.259624	0.871	0.832	2.22386e-46	L5 PT ALM Slco2a1	P21
Tll1	6.29212e-51	0.274905	0.231	0.14	2.27076e-46	L5 PT ALM Slco2a1	P21
Adra1a	2.85882e-50	0.293589	0.445	0.337	1.03172e-45	L5 PT ALM Slco2a1	P21
Psd3	1.33033e-49	0.25582	0.876	0.825	4.80104e-45	L5 PT ALM Slco2a1	P21
Fut9	1.57492e-49	0.274451	0.836	0.792	5.68374e-45	L5 PT ALM Slco2a1	P21
Pcsk5	2.34348e-49	0.263259	0.932	0.89	8.4574e-45	L5 PT ALM Slco2a1	P21
Kctd1	4.52177e-49	0.25118	0.495	0.433	1.63186e-44	L5 PT ALM Slco2a1	P21
Myo16	2.1623e-48	0.269695	0.544	0.482	7.80351e-44	L5 PT ALM Slco2a1	P21
Dgkg	1.83696e-47	0.313159	0.381	0.276	6.62939e-43	L5 PT ALM Slco2a1	P21
Map7	3.72764e-47	0.256717	0.558	0.484	1.34527e-42	L5 PT ALM Slco2a1	P21
Ak5	3.73438e-47	0.285857	0.412	0.328	1.3477e-42	L5 PT ALM Slco2a1	P21
Etl4	2.85645e-45	0.373729	0.858	0.818	1.03087e-40	L5 PT ALM Slco2a1	P21
Wdr17	5.81301e-45	0.250143	0.471	0.415	2.09786e-40	L5 PT ALM Slco2a1	P21
5330434G04Rik	3.4787e-44	0.34777	0.287	0.194	1.25543e-39	L5 PT ALM Slco2a1	P21
Cacnb2	1.80421e-43	0.281264	0.517	0.41	6.51121e-39	L5 PT ALM Slco2a1	P21
Plxdc2	2.12464e-43	0.26936	0.425	0.356	7.66761e-39	L5 PT ALM Slco2a1	P21
Cntnap5b	5.02122e-43	0.320256	0.711	0.646	1.81211e-38	L5 PT ALM Slco2a1	P21
Cdh10	8.04796e-41	0.302356	0.715	0.662	2.90443e-36	L5 PT ALM Slco2a1	P21
Zfpm2	9.47359e-40	0.28777	0.736	0.661	3.41893e-35	L5 PT ALM Slco2a1	P21
Slc16a2	9.63622e-40	0.260899	0.409	0.333	3.47762e-35	L5 PT ALM Slco2a1	P21
Trps1	4.44424e-39	0.256746	0.432	0.352	1.60388e-34	L5 PT ALM Slco2a1	P21
Gm44593	4.60363e-39	0.252049	0.373	0.303	1.6614e-34	L5 PT ALM Slco2a1	P21
Gm26691	3.46358e-38	0.273176	0.435	0.371	1.24997e-33	L5 PT ALM Slco2a1	P21
Kcnab1	2.32924e-35	0.345605	0.449	0.343	8.406e-31	L5 PT ALM Slco2a1	P21
Rora	0	1.17508	0.983	0.938	0	L5 PT ALM Hpgd	P21
Galnt17	0	1.07606	0.725	0.319	0	L5 PT ALM Hpgd	P21
Pdzrn3	0	0.983452	0.952	0.75	0	L5 PT ALM Hpgd	P21
Gm2164	0	0.915616	0.862	0.474	0	L5 PT ALM Hpgd	P21
Dlg2	0	0.76514	0.947	0.583	0	L5 PT ALM Hpgd	P21
Robo1	0	0.758863	0.982	0.938	0	L5 PT ALM Hpgd	P21
Asap1	1.09440481210295e-319	0.605427	0.983	0.968	3.94959752639832e-315	L5 PT ALM Hpgd	P21
Tcf25	1.05361e-295	0.517088	0.875	0.523	3.80239e-291	L5 PT ALM Hpgd	P21
Adcy8	1.40583e-285	0.818242	0.793	0.502	5.07351e-281	L5 PT ALM Hpgd	P21
Stxbp6	5.27271e-271	0.96795	0.611	0.28	1.90287e-266	L5 PT ALM Hpgd	P21
Rbfox1	2.60299e-267	0.435492	1	1	9.39393e-263	L5 PT ALM Hpgd	P21
A230057D06Rik	2.34988e-266	0.662731	0.831	0.493	8.4805e-262	L5 PT ALM Hpgd	P21
Egfem1	7.9419e-234	1.3713	0.473	0.213	2.86615e-229	L5 PT ALM Hpgd	P21
Kctd8	1.28116e-232	0.738845	0.717	0.41	4.62359e-228	L5 PT ALM Hpgd	P21
Zranb2	8.43713e-217	0.540975	0.955	0.833	3.04487e-212	L5 PT ALM Hpgd	P21
Nsd3	2.70012e-214	0.504909	0.789	0.473	9.74445e-210	L5 PT ALM Hpgd	P21
Sorbs1	1.20546e-211	0.641845	0.915	0.802	4.35039e-207	L5 PT ALM Hpgd	P21
Gm42418	8.56033e-208	0.722866	0.988	0.918	3.08934e-203	L5 PT ALM Hpgd	P21
Dscam	5.85474e-189	0.440697	0.99	0.986	2.11292e-184	L5 PT ALM Hpgd	P21
Npnt	3.2227e-186	0.55085	0.465	0.19	1.16304e-181	L5 PT ALM Hpgd	P21
Malat1	2.33006e-179	0.490216	1	1	8.40897e-175	L5 PT ALM Hpgd	P21
Fgf12	1.37497e-173	0.352155	0.997	0.984	4.96214e-169	L5 PT ALM Hpgd	P21
AY036118	2.88602e-168	0.491014	0.712	0.426	1.04153e-163	L5 PT ALM Hpgd	P21
Pak1	5.94257e-167	0.566379	0.811	0.651	2.14461e-162	L5 PT ALM Hpgd	P21
Grm1	5.33636e-161	0.630254	0.666	0.484	1.92584e-156	L5 PT ALM Hpgd	P21
Hectd4	1.05547e-160	0.411792	0.724	0.445	3.80909e-156	L5 PT ALM Hpgd	P21
AC129186.1	2.54664e-158	0.406319	0.76	0.49	9.19058e-154	L5 PT ALM Hpgd	P21
Sorbs2	7.39552e-158	0.49271	0.912	0.846	2.66897e-153	L5 PT ALM Hpgd	P21
D430041D05Rik	1.10968e-157	0.46905	0.944	0.885	4.00473e-153	L5 PT ALM Hpgd	P21
Ildr2	4.95732e-157	0.507657	0.571	0.304	1.78905e-152	L5 PT ALM Hpgd	P21
C78859	9.53782e-153	0.47104	0.623	0.354	3.4421e-148	L5 PT ALM Hpgd	P21
Cop1	3.46286e-152	0.506952	0.61	0.345	1.24971e-147	L5 PT ALM Hpgd	P21
Tshz2	6.04224e-152	0.791923	0.208	0.047	2.18059e-147	L5 PT ALM Hpgd	P21
Lrrtm4	3.95186e-150	0.479641	0.999	0.997	1.42619e-145	L5 PT ALM Hpgd	P21
Slf2	4.93815e-150	0.484907	0.612	0.349	1.78213e-145	L5 PT ALM Hpgd	P21
Asap2	1.14703e-146	0.516935	0.677	0.432	4.13951e-142	L5 PT ALM Hpgd	P21
Mical2	8.08942e-146	0.429776	0.968	0.927	2.91939e-141	L5 PT ALM Hpgd	P21
Satb2	1.32852e-145	0.610797	0.826	0.687	4.7945e-141	L5 PT ALM Hpgd	P21
Fstl4	1.73799e-145	0.704366	0.701	0.503	6.27224e-141	L5 PT ALM Hpgd	P21
Clvs1	4.36626e-142	0.492515	0.806	0.643	1.57574e-137	L5 PT ALM Hpgd	P21
Tmem150c	7.30716e-142	0.511291	0.581	0.362	2.63708e-137	L5 PT ALM Hpgd	P21
Fam189a1	1.35962e-136	0.419313	0.94	0.883	4.90674e-132	L5 PT ALM Hpgd	P21
Bicdl1	1.03489e-131	0.418499	0.588	0.336	3.7348e-127	L5 PT ALM Hpgd	P21
Mdga1	1.19254e-130	0.285829	0.164	0.027	4.30377e-126	L5 PT ALM Hpgd	P21
Gm21798	3.50912e-128	0.419014	0.357	0.148	1.26641e-123	L5 PT ALM Hpgd	P21
Lhfp	1.32331e-127	0.540868	0.502	0.284	4.7757e-123	L5 PT ALM Hpgd	P21
Slc8a1	2.49761e-127	0.369423	0.983	0.976	9.01363e-123	L5 PT ALM Hpgd	P21
Gsdme	2.67047e-125	0.431633	0.568	0.323	9.63745e-121	L5 PT ALM Hpgd	P21
Stpg2	8.15515e-125	0.508329	0.31	0.123	2.94311e-120	L5 PT ALM Hpgd	P21
Klf12	1.24851e-124	0.452307	0.801	0.62	4.50574e-120	L5 PT ALM Hpgd	P21
Kirrel3	8.0961e-122	0.510742	0.977	0.961	2.9218e-117	L5 PT ALM Hpgd	P21
Slc24a3	2.44716e-121	0.566612	0.371	0.165	8.83154e-117	L5 PT ALM Hpgd	P21
Tspoap1	6.62026e-120	0.412164	0.533	0.299	2.38919e-115	L5 PT ALM Hpgd	P21
Rgs17	7.79391e-116	0.49077	0.733	0.567	2.81274e-111	L5 PT ALM Hpgd	P21
Tmem200a	3.67672e-114	0.474786	0.672	0.469	1.32689e-109	L5 PT ALM Hpgd	P21
Kctd16	1.08802e-113	0.627593	0.863	0.768	3.92654e-109	L5 PT ALM Hpgd	P21
Prelid3a	4.78286e-113	0.3873	0.557	0.324	1.72609e-108	L5 PT ALM Hpgd	P21
Zfp644	2.90953e-112	0.385202	0.563	0.331	1.05002e-107	L5 PT ALM Hpgd	P21
Farp1	2.47601e-111	0.352218	0.955	0.928	8.93567e-107	L5 PT ALM Hpgd	P21
Col26a1	2.98378e-111	0.505418	0.165	0.042	1.07682e-106	L5 PT ALM Hpgd	P21
Nsd2	1.64106e-110	0.370774	0.542	0.312	5.92244e-106	L5 PT ALM Hpgd	P21
AC149090.1	5.94221e-109	0.41491	0.61	0.378	2.14448e-104	L5 PT ALM Hpgd	P21
Slc2a13	2.1854e-108	0.474999	0.871	0.805	7.88688e-104	L5 PT ALM Hpgd	P21
Ptprk	1.92627e-107	0.884538	0.563	0.389	6.9517e-103	L5 PT ALM Hpgd	P21
Srrm2	1.74906e-106	0.321139	0.991	0.975	6.31219e-102	L5 PT ALM Hpgd	P21
Etv1	1.69279e-103	0.512068	0.67	0.479	6.10911e-99	L5 PT ALM Hpgd	P21
Gm26883	2.40771e-103	0.362454	0.125	0.02	8.68918e-99	L5 PT ALM Hpgd	P21
Sh2d5	1.53007e-101	0.33946	0.342	0.159	5.52187e-97	L5 PT ALM Hpgd	P21
Catspere2	9.70589e-101	0.364748	0.586	0.363	3.50276e-96	L5 PT ALM Hpgd	P21
Sema6a	1.38478e-100	0.385798	0.409	0.208	4.99753e-96	L5 PT ALM Hpgd	P21
Slc4a3	1.40033e-100	0.422187	0.69	0.49	5.05365e-96	L5 PT ALM Hpgd	P21
Babam2	2.13556e-100	0.362287	0.542	0.322	7.70703e-96	L5 PT ALM Hpgd	P21
Erg	1.14271e-99	0.403053	0.187	0.054	4.12391e-95	L5 PT ALM Hpgd	P21
Ankrd33b	7.54649e-98	0.430124	0.596	0.39	2.72345e-93	L5 PT ALM Hpgd	P21
Tmem108	3.83088e-97	0.457454	0.918	0.833	1.38253e-92	L5 PT ALM Hpgd	P21
Gm40841	1.08551e-94	0.396348	0.544	0.334	3.9175e-90	L5 PT ALM Hpgd	P21
Ptgfrn	2.95529e-94	0.278442	0.218	0.074	1.06653e-89	L5 PT ALM Hpgd	P21
Tmem131l	6.04514e-94	0.33294	0.442	0.241	2.18163e-89	L5 PT ALM Hpgd	P21
Hcn1	6.32427e-94	0.276658	0.993	0.993	2.28236e-89	L5 PT ALM Hpgd	P21
Gm43948	2.55716e-93	0.324182	0.312	0.139	9.22855e-89	L5 PT ALM Hpgd	P21
Galnt7	3.72033e-93	0.419879	0.629	0.463	1.34263e-88	L5 PT ALM Hpgd	P21
A630089N07Rik	4.27179e-91	0.349546	0.357	0.176	1.54164e-86	L5 PT ALM Hpgd	P21
Rtl4	1.02823e-90	0.463331	0.469	0.271	3.71077e-86	L5 PT ALM Hpgd	P21
Fam19a1	1.70306e-89	0.250638	0.999	0.999	6.14616e-85	L5 PT ALM Hpgd	P21
Mia2	7.36217e-89	0.319349	0.545	0.337	2.65693e-84	L5 PT ALM Hpgd	P21
Plcb4	4.51579e-88	0.35914	0.797	0.624	1.6297e-83	L5 PT ALM Hpgd	P21
Wwc1	1.0508e-87	0.455223	0.728	0.628	3.79225e-83	L5 PT ALM Hpgd	P21
Gucy1b1	1.26732e-87	0.319096	0.459	0.261	4.57361e-83	L5 PT ALM Hpgd	P21
Trpc7	4.20921e-87	0.307555	0.201	0.066	1.51906e-82	L5 PT ALM Hpgd	P21
Gm27008	1.22146e-86	0.258214	0.25	0.099	4.40812e-82	L5 PT ALM Hpgd	P21
Gm36251	3.62456e-86	0.34954	0.267	0.114	1.30807e-81	L5 PT ALM Hpgd	P21
Oxr1	4.87055e-86	0.319326	0.972	0.962	1.75773e-81	L5 PT ALM Hpgd	P21
Kcnip3	1.17269e-85	0.462638	0.437	0.261	4.23212e-81	L5 PT ALM Hpgd	P21
Rab31	4.57655e-85	0.336836	0.357	0.178	1.65163e-80	L5 PT ALM Hpgd	P21
AC165953.2	1.12836e-84	0.313527	0.56	0.355	4.07213e-80	L5 PT ALM Hpgd	P21
Gm48091	5.99782e-84	0.321092	0.463	0.268	2.16455e-79	L5 PT ALM Hpgd	P21
Samd4	2.44235e-82	0.398058	0.668	0.49	8.81419e-78	L5 PT ALM Hpgd	P21
Epha3	5.1796e-82	0.419095	0.547	0.369	1.86927e-77	L5 PT ALM Hpgd	P21
Cacng3	1.13697e-78	0.374787	0.734	0.608	4.10321e-74	L5 PT ALM Hpgd	P21
Rcan2	1.36182e-78	0.360923	0.502	0.311	4.91468e-74	L5 PT ALM Hpgd	P21
Mast4	2.70022e-78	0.283493	0.965	0.936	9.74484e-74	L5 PT ALM Hpgd	P21
Pabpn1	7.79295e-78	0.321697	0.526	0.333	2.8124e-73	L5 PT ALM Hpgd	P21
Frmd5	9.83583e-78	0.295778	0.986	0.983	3.54965e-73	L5 PT ALM Hpgd	P21
Rnpc3	3.7013e-77	0.320771	0.662	0.471	1.33576e-72	L5 PT ALM Hpgd	P21
Gm40437	9.19726e-77	0.295972	0.27	0.121	3.3192e-72	L5 PT ALM Hpgd	P21
Vwc2l	4.48638e-76	0.555163	0.24	0.098	1.61909e-71	L5 PT ALM Hpgd	P21
Sox5os4	1.57885e-74	0.37276	0.516	0.338	5.6979e-70	L5 PT ALM Hpgd	P21
Osbpl6	1.11362e-72	0.262597	0.968	0.945	4.01893e-68	L5 PT ALM Hpgd	P21
Gm47283	3.12673e-72	0.306696	0.496	0.311	1.12841e-67	L5 PT ALM Hpgd	P21
Wwox	5.05274e-72	0.408522	0.826	0.709	1.82348e-67	L5 PT ALM Hpgd	P21
Gm13211	5.30857e-72	0.312132	0.323	0.165	1.91581e-67	L5 PT ALM Hpgd	P21
Ptprm	1.23229e-71	0.413756	0.53	0.352	4.4472e-67	L5 PT ALM Hpgd	P21
Lamp5	2.05999e-71	0.33309	0.564	0.39	7.4343e-67	L5 PT ALM Hpgd	P21
Cds1	1.10667e-70	0.353108	0.656	0.513	3.99387e-66	L5 PT ALM Hpgd	P21
Shisa6	1.99883e-70	0.323454	0.223	0.1	7.21358e-66	L5 PT ALM Hpgd	P21
Sgsm1	9.44192e-70	0.394556	0.589	0.441	3.40749e-65	L5 PT ALM Hpgd	P21
Rab3c	1.80931e-69	0.320269	0.884	0.828	6.5296e-65	L5 PT ALM Hpgd	P21
Vat1l	7.08379e-69	0.399058	0.446	0.292	2.55647e-64	L5 PT ALM Hpgd	P21
Chst11	1.29325e-68	0.325727	0.343	0.188	4.66722e-64	L5 PT ALM Hpgd	P21
Shank2	1.57019e-68	0.349437	0.874	0.788	5.66666e-64	L5 PT ALM Hpgd	P21
Gm49353	1.76575e-68	0.278235	0.455	0.279	6.37243e-64	L5 PT ALM Hpgd	P21
Lnpk	4.82478e-68	0.285804	0.439	0.266	1.74122e-63	L5 PT ALM Hpgd	P21
4933413L06Rik	7.28916e-68	0.365151	0.496	0.328	2.63059e-63	L5 PT ALM Hpgd	P21
Atp6v0b	1.84256e-67	0.330129	0.878	0.783	6.64962e-63	L5 PT ALM Hpgd	P21
Raver2	3.35072e-67	0.336073	0.673	0.524	1.20924e-62	L5 PT ALM Hpgd	P21
2900055J20Rik	3.99355e-67	0.333137	0.334	0.187	1.44123e-62	L5 PT ALM Hpgd	P21
Kcnk9	1.17004e-66	0.254648	0.361	0.201	4.22255e-62	L5 PT ALM Hpgd	P21
CT025619.1	1.93655e-66	0.274995	0.39	0.225	6.98881e-62	L5 PT ALM Hpgd	P21
Acp1	2.01475e-66	0.290803	0.426	0.258	7.27103e-62	L5 PT ALM Hpgd	P21
4930587E11Rik	4.94481e-66	0.253047	0.311	0.161	1.78453e-61	L5 PT ALM Hpgd	P21
B230307C23Rik	3.3028e-65	0.261928	0.578	0.398	1.19195e-60	L5 PT ALM Hpgd	P21
Syne1	3.71922e-65	0.287377	0.956	0.93	1.34223e-60	L5 PT ALM Hpgd	P21
2001-03-01	8.97752e-65	0.452542	0.643	0.517	3.2399e-60	L5 PT ALM Hpgd	P21
Gm42303	1.44053e-64	0.256274	0.35	0.193	5.19874e-60	L5 PT ALM Hpgd	P21
Gm48678	1.56426e-64	0.260677	0.37	0.21	5.64527e-60	L5 PT ALM Hpgd	P21
Cdh4	4.36382e-64	0.383778	0.575	0.409	1.57486e-59	L5 PT ALM Hpgd	P21
4930570B17Rik	4.57376e-64	0.260443	0.334	0.181	1.65062e-59	L5 PT ALM Hpgd	P21
Ppp4r3a	5.84584e-64	0.26671	0.378	0.219	2.1097e-59	L5 PT ALM Hpgd	P21
Ralgapa2	7.39862e-64	0.256364	0.951	0.934	2.67009e-59	L5 PT ALM Hpgd	P21
Son	8.77617e-64	0.280154	0.938	0.867	3.16723e-59	L5 PT ALM Hpgd	P21
Epha4	1.95358e-62	0.329364	0.762	0.648	7.05027e-58	L5 PT ALM Hpgd	P21
Prpf4b	2.0204e-62	0.285432	0.898	0.814	7.29141e-58	L5 PT ALM Hpgd	P21
Tbc1d1	3.27499e-62	0.28118	0.357	0.203	1.18191e-57	L5 PT ALM Hpgd	P21
Mrps5	1.7182e-61	0.284542	0.567	0.396	6.20079e-57	L5 PT ALM Hpgd	P21
Eipr1	2.34113e-61	0.255947	0.418	0.255	8.44889e-57	L5 PT ALM Hpgd	P21
4430402I18Rik	4.04524e-61	0.315122	0.522	0.36	1.45989e-56	L5 PT ALM Hpgd	P21
Ppp6r2	5.6727e-61	0.276865	0.583	0.41	2.04722e-56	L5 PT ALM Hpgd	P21
Shc3	7.51123e-61	0.321739	0.684	0.538	2.71073e-56	L5 PT ALM Hpgd	P21
Kif26b	1.42843e-60	0.312505	0.478	0.318	5.15505e-56	L5 PT ALM Hpgd	P21
Nell1	2.20366e-60	0.447314	0.826	0.843	7.9528e-56	L5 PT ALM Hpgd	P21
Gm45846	5.45722e-60	0.251335	0.27	0.136	1.96945e-55	L5 PT ALM Hpgd	P21
Chst1	1.01786e-59	0.309188	0.457	0.298	3.67337e-55	L5 PT ALM Hpgd	P21
Timm44	1.2588e-58	0.3035	0.685	0.525	4.54287e-54	L5 PT ALM Hpgd	P21
Gm35188	4.2296e-58	0.256326	0.364	0.212	1.52642e-53	L5 PT ALM Hpgd	P21
Gm20275	7.91236e-58	0.252767	0.406	0.248	2.85549e-53	L5 PT ALM Hpgd	P21
Tshz3	1.0846e-57	0.305109	0.663	0.506	3.9142e-53	L5 PT ALM Hpgd	P21
Gria4	1.23099e-57	0.304249	0.894	0.852	4.44252e-53	L5 PT ALM Hpgd	P21
Cwc22	2.53286e-57	0.417375	0.577	0.423	9.14084e-53	L5 PT ALM Hpgd	P21
Luc7l3	5.26976e-57	0.296943	0.885	0.783	1.9018e-52	L5 PT ALM Hpgd	P21
Pcgf5	3.04719e-56	0.308815	0.724	0.58	1.0997e-51	L5 PT ALM Hpgd	P21
Mast3	9.90464e-56	0.306969	0.555	0.403	3.57449e-51	L5 PT ALM Hpgd	P21
Dgkh	2.03098e-55	0.273775	0.889	0.837	7.3296e-51	L5 PT ALM Hpgd	P21
Srsf11	1.60183e-53	0.292469	0.832	0.718	5.78083e-49	L5 PT ALM Hpgd	P21
Mir124a-1hg	5.2591e-53	0.297647	0.806	0.702	1.89796e-48	L5 PT ALM Hpgd	P21
Nrgn	6.96951e-52	0.28785	0.718	0.58	2.51523e-47	L5 PT ALM Hpgd	P21
Cpne8	1.01304e-51	0.293775	0.559	0.407	3.65595e-47	L5 PT ALM Hpgd	P21
Rbm24	1.07939e-51	0.27065	0.491	0.338	3.89541e-47	L5 PT ALM Hpgd	P21
Klhl32	1.99338e-51	0.290067	0.775	0.695	7.1939e-47	L5 PT ALM Hpgd	P21
Cadps2	3.32432e-51	0.513162	0.753	0.689	1.19971e-46	L5 PT ALM Hpgd	P21
Mbp	1.30264e-50	0.292051	0.532	0.383	4.70111e-46	L5 PT ALM Hpgd	P21
Ktn1	1.44596e-50	0.250181	0.925	0.86	5.21831e-46	L5 PT ALM Hpgd	P21
Cobl	9.64416e-50	0.273457	0.855	0.787	3.48048e-45	L5 PT ALM Hpgd	P21
Pfkfb4	1.97118e-49	0.258985	0.389	0.248	7.1138e-45	L5 PT ALM Hpgd	P21
Hnrnpa2b1	3.81284e-49	0.268131	0.734	0.597	1.37602e-44	L5 PT ALM Hpgd	P21
Spock1	1.14794e-48	0.320328	0.913	0.872	4.14279e-44	L5 PT ALM Hpgd	P21
Gm26917	1.62731e-48	0.41371	0.719	0.587	5.87281e-44	L5 PT ALM Hpgd	P21
Sfpq	2.94264e-48	0.26157	0.818	0.708	1.06197e-43	L5 PT ALM Hpgd	P21
Ptn	5.5138e-48	0.297827	0.374	0.245	1.98988e-43	L5 PT ALM Hpgd	P21
Eda	7.36246e-48	0.35157	0.542	0.405	2.65704e-43	L5 PT ALM Hpgd	P21
Sorbs2os	1.23858e-47	0.273461	0.395	0.258	4.4699e-43	L5 PT ALM Hpgd	P21
Tmem163	5.0414e-47	0.301876	0.796	0.705	1.81939e-42	L5 PT ALM Hpgd	P21
Specc1	5.30005e-47	0.295911	0.879	0.815	1.91273e-42	L5 PT ALM Hpgd	P21
Gpc5	7.87865e-46	0.433062	0.645	0.603	2.84333e-41	L5 PT ALM Hpgd	P21
Pitpnm3	1.2642e-43	0.256595	0.587	0.448	4.56239e-39	L5 PT ALM Hpgd	P21
Xkr6	1.04594e-42	0.26698	0.85	0.799	3.77468e-38	L5 PT ALM Hpgd	P21
Taco1	1.07918e-42	0.344489	0.429	0.294	3.89466e-38	L5 PT ALM Hpgd	P21
Ppib	2.0942e-42	0.252729	0.745	0.621	7.55776e-38	L5 PT ALM Hpgd	P21
Sv2c	3.53116e-42	0.312867	0.441	0.306	1.27436e-37	L5 PT ALM Hpgd	P21
AC121788.1	4.2279e-42	0.469716	0.331	0.206	1.52581e-37	L5 PT ALM Hpgd	P21
Pnisr	8.02012e-42	0.255	0.866	0.788	2.89438e-37	L5 PT ALM Hpgd	P21
Xist	1.64847e-41	0.402786	0.565	0.43	5.94918e-37	L5 PT ALM Hpgd	P21
Gm15594	3.03077e-41	0.272071	0.589	0.453	1.09377e-36	L5 PT ALM Hpgd	P21
Ndfip1	4.3447e-41	0.268925	0.785	0.706	1.56796e-36	L5 PT ALM Hpgd	P21
Frmd6	4.51655e-40	0.276945	0.704	0.591	1.62998e-35	L5 PT ALM Hpgd	P21
Gm16083	9.85363e-40	0.25804	0.366	0.242	3.55608e-35	L5 PT ALM Hpgd	P21
Cdh22	1.58499e-39	0.271912	0.631	0.506	5.72006e-35	L5 PT ALM Hpgd	P21
6430573F11Rik	2.8709e-39	0.279177	0.556	0.432	1.03608e-34	L5 PT ALM Hpgd	P21
Rgs6	7.88943e-39	0.345635	0.835	0.802	2.84722e-34	L5 PT ALM Hpgd	P21
Usp25	4.90466e-38	0.252617	0.558	0.43	1.77004e-33	L5 PT ALM Hpgd	P21
Grik1	4.24091e-36	0.268987	0.125	0.057	1.5305e-31	L5 PT ALM Hpgd	P21
Mlip	1.3323e-34	0.259935	0.559	0.433	4.80815e-30	L5 PT ALM Hpgd	P21
BC005561	1.53487e-34	0.252703	0.792	0.702	5.53918e-30	L5 PT ALM Hpgd	P21
Galnt14	2.97031e-34	0.263523	0.618	0.492	1.07195e-29	L5 PT ALM Hpgd	P21
Nav1	5.16492e-34	0.253703	0.854	0.809	1.86397e-29	L5 PT ALM Hpgd	P21
Ctnna3	7.1852e-33	0.252311	0.816	0.76	2.59307e-28	L5 PT ALM Hpgd	P21
Runx1t1	3.05617e-32	0.252487	0.522	0.429	1.10294e-27	L5 PT ALM Hpgd	P21
9630028H03Rik	1.82673e-31	0.27072	0.602	0.491	6.5925e-27	L5 PT ALM Hpgd	P21
Arhgap29	2.34763e-30	0.252874	0.401	0.294	8.47238e-26	L5 PT ALM Hpgd	P21
Tenm3	1.11923e-13	0.316408	0.712	0.731	4.03919e-09	L5 PT ALM Hpgd	P21
Dcc	0	2.90286	0.796	0.296	0	L5 PT ALM Npsr1	P21
Tmtc2	0	1.86253	0.908	0.532	0	L5 PT ALM Npsr1	P21
Grin3a	1.19183e-290	1.73679	0.673	0.151	4.30121e-286	L5 PT ALM Npsr1	P21
Sorcs1	6.35794e-255	1.15281	1	0.98	2.29452e-250	L5 PT ALM Npsr1	P21
Lrrc4c	2.50241e-226	1.45887	0.993	0.948	9.03093e-222	L5 PT ALM Npsr1	P21
Plcb4	5.5555e-214	1.16256	0.948	0.663	2.00492e-209	L5 PT ALM Npsr1	P21
Vwc2l	8.21214e-195	1.65275	0.585	0.115	2.96368e-190	L5 PT ALM Npsr1	P21
Fn1	3.06961e-191	0.985971	0.331	0.017	1.10779e-186	L5 PT ALM Npsr1	P21
Samd5	1.09913e-186	1.01981	0.573	0.119	3.96664e-182	L5 PT ALM Npsr1	P21
Ust	3.16566e-185	1.20889	0.824	0.447	1.14246e-180	L5 PT ALM Npsr1	P21
Rora	5.12816e-180	1.32953	0.997	0.95	1.8507e-175	L5 PT ALM Npsr1	P21
Chrnb3	8.58297e-177	0.562131	0.28	0.007	3.09751e-172	L5 PT ALM Npsr1	P21
Reln	4.26277e-169	1.36224	0.631	0.356	1.53839e-164	L5 PT ALM Npsr1	P21
Ltbp1	1.7173e-159	0.986942	0.659	0.172	6.19755e-155	L5 PT ALM Npsr1	P21
Ccdc136	1.56182e-146	0.93693	0.745	0.375	5.63644e-142	L5 PT ALM Npsr1	P21
Nrg1	4.09773e-145	1.60442	0.946	0.875	1.47883e-140	L5 PT ALM Npsr1	P21
Kcnb2	1.49581e-143	1.25586	0.961	0.883	5.39822e-139	L5 PT ALM Npsr1	P21
Ttc28	4.09567e-141	0.913498	0.704	0.266	1.47809e-136	L5 PT ALM Npsr1	P21
Kcnh5	7.23935e-127	0.82569	0.631	0.208	2.61261e-122	L5 PT ALM Npsr1	P21
Galnt18	1.5052e-125	0.853268	0.965	0.755	5.43211e-121	L5 PT ALM Npsr1	P21
Fam19a1	5.83336e-124	0.617501	1	0.999	2.1052e-119	L5 PT ALM Npsr1	P21
Fat3	9.59162e-122	0.635984	1	0.985	3.46152e-117	L5 PT ALM Npsr1	P21
Otx1	1.08628e-120	0.451378	0.331	0.038	3.92027e-116	L5 PT ALM Npsr1	P21
Ncald	1.40651e-120	0.918351	0.582	0.249	5.07596e-116	L5 PT ALM Npsr1	P21
Nrip1	2.40755e-119	0.880223	0.663	0.334	8.68861e-115	L5 PT ALM Npsr1	P21
Gm49171	4.61788e-116	0.679762	0.299	0.035	1.66655e-111	L5 PT ALM Npsr1	P21
Pcdh9	1.59834e-112	0.881817	1	0.988	5.76826e-108	L5 PT ALM Npsr1	P21
Ildr2	2.26931e-112	0.755594	0.78	0.367	8.18973e-108	L5 PT ALM Npsr1	P21
Htr2a	8.52543e-112	0.814326	0.468	0.144	3.07674e-107	L5 PT ALM Npsr1	P21
Sash1	3.02899e-110	0.549024	0.37	0.062	1.09313e-105	L5 PT ALM Npsr1	P21
Ptprm	7.81373e-110	0.934244	0.776	0.386	2.8199e-105	L5 PT ALM Npsr1	P21
AC156026.1	1.00259e-109	0.45955	0.262	0.024	3.61824e-105	L5 PT ALM Npsr1	P21
Adcy8	2.73562e-106	0.885849	0.867	0.582	9.87259e-102	L5 PT ALM Npsr1	P21
Ehbp1	3.06364e-104	0.70339	0.972	0.858	1.10564e-99	L5 PT ALM Npsr1	P21
Cnih3	8.91561e-104	0.788248	0.808	0.505	3.21755e-99	L5 PT ALM Npsr1	P21
Plxna2	1.29251e-103	0.763699	0.942	0.792	4.66453e-99	L5 PT ALM Npsr1	P21
Cntn3	5.27958e-100	0.736913	0.975	0.885	1.90535e-95	L5 PT ALM Npsr1	P21
Olfm3	5.8625e-99	0.736498	0.593	0.207	2.11572e-94	L5 PT ALM Npsr1	P21
Tmem44	9.693e-99	0.687931	0.627	0.253	3.49811e-94	L5 PT ALM Npsr1	P21
Galnt17	4.45139e-96	0.954479	0.783	0.433	1.60646e-91	L5 PT ALM Npsr1	P21
Rarb	7.64568e-94	0.802325	0.515	0.182	2.75925e-89	L5 PT ALM Npsr1	P21
Tmem108	8.93078e-94	0.679556	0.984	0.853	3.22303e-89	L5 PT ALM Npsr1	P21
Npnt	2.49675e-92	0.621994	0.646	0.257	9.01051e-88	L5 PT ALM Npsr1	P21
Cpne7	3.4751e-92	0.486588	0.273	0.036	1.25413e-87	L5 PT ALM Npsr1	P21
Frmpd4	8.89695e-92	0.599136	0.996	0.954	3.21082e-87	L5 PT ALM Npsr1	P21
Kctd8	7.01879e-90	0.868021	0.822	0.492	2.53301e-85	L5 PT ALM Npsr1	P21
Syndig1	3.15256e-88	0.785957	0.851	0.658	1.13773e-83	L5 PT ALM Npsr1	P21
Gm30648	1.73686e-85	0.50085	0.328	0.066	6.26815e-81	L5 PT ALM Npsr1	P21
Elfn1	3.21031e-85	0.324069	0.242	0.028	1.15857e-80	L5 PT ALM Npsr1	P21
Robo3	4.07767e-85	0.739717	0.608	0.268	1.47159e-80	L5 PT ALM Npsr1	P21
Car4	9.36348e-85	0.382272	0.23	0.025	3.37919e-80	L5 PT ALM Npsr1	P21
Cdh4	5.51168e-84	1.07341	0.652	0.452	1.98911e-79	L5 PT ALM Npsr1	P21
Gm48749	9.2276e-84	0.320964	0.206	0.018	3.33015e-79	L5 PT ALM Npsr1	P21
Mme	1.68797e-83	0.365958	0.236	0.027	6.09172e-79	L5 PT ALM Npsr1	P21
Il1rapl2	3.5459e-83	0.765327	0.398	0.113	1.27968e-78	L5 PT ALM Npsr1	P21
Cers6	9.71173e-83	0.654693	0.926	0.736	3.50487e-78	L5 PT ALM Npsr1	P21
Utrn	4.77003e-82	0.827139	0.719	0.516	1.72146e-77	L5 PT ALM Npsr1	P21
4930445B16Rik	5.05277e-82	0.436521	0.264	0.04	1.82349e-77	L5 PT ALM Npsr1	P21
Slc24a3	1.02995e-79	0.815122	0.535	0.214	3.717e-75	L5 PT ALM Npsr1	P21
Zfp462	2.44166e-79	0.747607	0.691	0.456	8.8117e-75	L5 PT ALM Npsr1	P21
Inpp4b	3.07108e-79	0.817323	0.359	0.123	1.10832e-74	L5 PT ALM Npsr1	P21
Zmat4	3.187e-79	0.654423	0.923	0.683	1.15016e-74	L5 PT ALM Npsr1	P21
Hs6st3	3.59274e-78	0.640016	1	0.982	1.29659e-73	L5 PT ALM Npsr1	P21
2003-03-01	6.42776e-76	0.672644	0.601	0.272	2.31972e-71	L5 PT ALM Npsr1	P21
Tspan33	6.73236e-76	0.568388	0.388	0.12	2.42964e-71	L5 PT ALM Npsr1	P21
Grm5	1.489e-75	0.446197	1	0.997	5.37366e-71	L5 PT ALM Npsr1	P21
Pde8b	3.41208e-75	0.739512	0.792	0.509	1.23139e-70	L5 PT ALM Npsr1	P21
Csmd1	1.6609e-72	0.36992	1	1	5.99404e-68	L5 PT ALM Npsr1	P21
Apba2	5.88289e-72	0.557325	0.978	0.902	2.12307e-67	L5 PT ALM Npsr1	P21
A230057D06Rik	8.23765e-72	0.642813	0.882	0.588	2.97289e-67	L5 PT ALM Npsr1	P21
Pcsk6	1.61807e-70	0.422199	0.274	0.052	5.83946e-66	L5 PT ALM Npsr1	P21
Myo1b	2.07062e-70	0.446755	0.408	0.122	7.47267e-66	L5 PT ALM Npsr1	P21
Pou6f2	5.35351e-70	0.44699	0.27	0.05	1.93203e-65	L5 PT ALM Npsr1	P21
Egflam	3.71092e-68	0.321654	0.157	0.012	1.33923e-63	L5 PT ALM Npsr1	P21
Arap2	5.70342e-68	0.586201	0.933	0.807	2.05831e-63	L5 PT ALM Npsr1	P21
Syt9	2.03432e-67	0.577466	0.411	0.145	7.34165e-63	L5 PT ALM Npsr1	P21
Pde7b	6.58583e-67	0.630016	0.452	0.163	2.37676e-62	L5 PT ALM Npsr1	P21
Rcan2	7.80324e-67	0.56559	0.688	0.353	2.81611e-62	L5 PT ALM Npsr1	P21
Satb2	1.7967e-66	0.608474	0.929	0.72	6.48412e-62	L5 PT ALM Npsr1	P21
Sema5a	1.99174e-66	0.419284	0.255	0.047	7.188e-62	L5 PT ALM Npsr1	P21
Slc8a3	2.33932e-66	0.537817	0.755	0.426	8.44236e-62	L5 PT ALM Npsr1	P21
Nol4	4.20071e-66	0.58901	0.961	0.818	1.51599e-61	L5 PT ALM Npsr1	P21
Kcnk2	3.42579e-65	0.504174	0.318	0.078	1.23633e-60	L5 PT ALM Npsr1	P21
Cux2	1.33453e-63	0.33716	0.21	0.031	4.81618e-59	L5 PT ALM Npsr1	P21
Car10	1.44831e-61	0.785344	0.86	0.697	5.22682e-57	L5 PT ALM Npsr1	P21
Npas3	4.86052e-61	0.707257	0.487	0.234	1.75411e-56	L5 PT ALM Npsr1	P21
Dscam	9.22641e-60	0.406335	1	0.987	3.32972e-55	L5 PT ALM Npsr1	P21
D430041D05Rik	1.14816e-59	0.570016	0.971	0.9	4.14361e-55	L5 PT ALM Npsr1	P21
Ankrd33b	2.26891e-59	0.525459	0.749	0.439	8.18826e-55	L5 PT ALM Npsr1	P21
Anks1b	1.10753e-58	0.276467	1	1	3.99697e-54	L5 PT ALM Npsr1	P21
Piezo2	8.31421e-58	0.331633	0.125	0.008	3.00052e-53	L5 PT ALM Npsr1	P21
Lsamp	1.16859e-57	0.410761	1	0.919	4.21731e-53	L5 PT ALM Npsr1	P21
Nrxn3	3.42874e-56	0.519782	1	0.999	1.2374e-51	L5 PT ALM Npsr1	P21
Brinp3	4.95951e-56	0.770998	0.854	0.614	1.78984e-51	L5 PT ALM Npsr1	P21
Adamts16	1.07289e-55	0.270019	0.128	0.009	3.87194e-51	L5 PT ALM Npsr1	P21
Camk2d	1.12845e-55	0.504205	0.423	0.164	4.07246e-51	L5 PT ALM Npsr1	P21
Rit2	2.00438e-55	0.637696	0.873	0.683	7.23359e-51	L5 PT ALM Npsr1	P21
Klhl32	2.36485e-55	0.514348	0.899	0.71	8.53451e-51	L5 PT ALM Npsr1	P21
Spock3	3.90664e-55	0.826019	0.493	0.287	1.40987e-50	L5 PT ALM Npsr1	P21
Gm11639	1.18418e-54	0.422405	0.29	0.079	4.27357e-50	L5 PT ALM Npsr1	P21
Tmem200a	3.2848e-54	0.53953	0.792	0.52	1.18545e-49	L5 PT ALM Npsr1	P21
Gabrg3	4.13145e-54	0.536089	0.983	0.952	1.491e-49	L5 PT ALM Npsr1	P21
Whrn	1.10191e-53	0.378267	0.286	0.075	3.97668e-49	L5 PT ALM Npsr1	P21
Tcf12	1.14814e-53	0.618627	0.828	0.652	4.14352e-49	L5 PT ALM Npsr1	P21
Mapk4	1.15883e-53	0.535982	0.455	0.196	4.18209e-49	L5 PT ALM Npsr1	P21
Tgfbr1	1.7141e-52	0.387484	0.483	0.208	6.18601e-48	L5 PT ALM Npsr1	P21
Lmo4	9.36377e-52	0.470008	0.603	0.317	3.37929e-47	L5 PT ALM Npsr1	P21
Zfp385b	1.20776e-51	0.407651	0.996	0.972	4.3587e-47	L5 PT ALM Npsr1	P21
Satb1	1.50277e-51	0.581759	0.655	0.407	5.42334e-47	L5 PT ALM Npsr1	P21
Limch1	6.41139e-51	0.549089	0.614	0.34	2.31381e-46	L5 PT ALM Npsr1	P21
Hectd4	1.00734e-50	0.477032	0.8	0.521	3.63539e-46	L5 PT ALM Npsr1	P21
Il1rapl1	3.53341e-50	0.365754	1	0.998	1.27517e-45	L5 PT ALM Npsr1	P21
Mlip	1.00239e-49	0.513512	0.735	0.457	3.61753e-45	L5 PT ALM Npsr1	P21
Trpv6	3.5249e-49	0.272855	0.206	0.041	1.2721e-44	L5 PT ALM Npsr1	P21
Synpr	1.57991e-48	0.418234	0.357	0.126	5.70174e-44	L5 PT ALM Npsr1	P21
Galnt14	4.22309e-48	0.495909	0.79	0.516	1.52407e-43	L5 PT ALM Npsr1	P21
Hs6st2	8.91022e-48	0.450716	0.894	0.668	3.21561e-43	L5 PT ALM Npsr1	P21
Klf12	9.90642e-48	0.52989	0.87	0.668	3.57513e-43	L5 PT ALM Npsr1	P21
Gm28905	4.79237e-47	0.652226	0.771	0.555	1.72952e-42	L5 PT ALM Npsr1	P21
Dlg2	6.14696e-47	0.375854	0.924	0.691	2.21838e-42	L5 PT ALM Npsr1	P21
Nsd3	1.63898e-46	0.406585	0.831	0.563	5.91492e-42	L5 PT ALM Npsr1	P21
Brinp2	1.89232e-46	0.484513	0.8	0.545	6.82918e-42	L5 PT ALM Npsr1	P21
Slc26a4	9.974e-46	0.533767	0.551	0.284	3.59952e-41	L5 PT ALM Npsr1	P21
Astn1	1.01669e-45	0.474628	0.828	0.603	3.66913e-41	L5 PT ALM Npsr1	P21
Lrrc49	2.28162e-45	0.366606	0.679	0.399	8.23414e-41	L5 PT ALM Npsr1	P21
Zfp808	2.40378e-45	0.488214	0.292	0.104	8.675e-41	L5 PT ALM Npsr1	P21
Phf24	2.52602e-45	0.468374	0.911	0.761	9.11617e-41	L5 PT ALM Npsr1	P21
Tshz2	4.39838e-45	0.422208	0.28	0.089	1.58733e-40	L5 PT ALM Npsr1	P21
Gm9866	8.98668e-45	0.25033	0.308	0.103	3.2432e-40	L5 PT ALM Npsr1	P21
Tmeff2	7.3855e-44	0.515621	0.974	0.9	2.66535e-39	L5 PT ALM Npsr1	P21
Pdlim7	1.81069e-43	0.35859	0.538	0.273	6.53461e-39	L5 PT ALM Npsr1	P21
Dnm3	6.67218e-43	0.440073	0.905	0.716	2.40792e-38	L5 PT ALM Npsr1	P21
Fry	8.69998e-43	0.372413	0.974	0.878	3.13974e-38	L5 PT ALM Npsr1	P21
Gm21798	1.96093e-42	0.354178	0.448	0.203	7.07679e-38	L5 PT ALM Npsr1	P21
Kcnh1	2.24256e-42	0.515675	0.774	0.548	8.09316e-38	L5 PT ALM Npsr1	P21
Lypd1	3.51106e-42	0.473527	0.332	0.132	1.26711e-37	L5 PT ALM Npsr1	P21
Sorcs3	6.29465e-42	0.57317	0.456	0.224	2.27168e-37	L5 PT ALM Npsr1	P21
Dpy19l1	7.20565e-41	0.398953	0.653	0.387	2.60045e-36	L5 PT ALM Npsr1	P21
Nrg2	8.43995e-41	0.377568	0.81	0.559	3.04589e-36	L5 PT ALM Npsr1	P21
Camk4	1.4572e-40	0.493811	0.897	0.778	5.25889e-36	L5 PT ALM Npsr1	P21
Wdpcp	1.55692e-40	0.537997	0.606	0.376	5.61879e-36	L5 PT ALM Npsr1	P21
Egfem1	5.49631e-40	0.798871	0.528	0.285	1.98356e-35	L5 PT ALM Npsr1	P21
Cxxc4	6.47361e-40	0.481165	0.644	0.416	2.33626e-35	L5 PT ALM Npsr1	P21
Fgf12	6.64084e-40	0.378124	1	0.988	2.39661e-35	L5 PT ALM Npsr1	P21
Lgr4	7.14031e-40	0.426227	0.595	0.343	2.57687e-35	L5 PT ALM Npsr1	P21
Rph3a	1.55543e-39	0.393888	0.646	0.384	5.61339e-35	L5 PT ALM Npsr1	P21
Sgk1	8.10305e-39	0.459769	0.809	0.616	2.92431e-34	L5 PT ALM Npsr1	P21
Lhfp	8.57941e-39	0.466653	0.596	0.341	3.09622e-34	L5 PT ALM Npsr1	P21
4930401C15Rik	1.94029e-38	0.331644	0.216	0.057	7.0023e-34	L5 PT ALM Npsr1	P21
Ctnnal1	3.5591e-38	0.323493	0.694	0.437	1.28444e-33	L5 PT ALM Npsr1	P21
Sntg1	6.15627e-38	0.359697	0.993	0.929	2.22174e-33	L5 PT ALM Npsr1	P21
Ptchd4	9.46444e-38	0.464896	0.627	0.374	3.41562e-33	L5 PT ALM Npsr1	P21
Cux1	1.2128e-37	0.371102	0.622	0.368	4.37687e-33	L5 PT ALM Npsr1	P21
Kif16b	1.41182e-37	0.269155	0.636	0.385	5.09513e-33	L5 PT ALM Npsr1	P21
Gm20752	1.67803e-37	0.344377	0.265	0.087	6.05586e-33	L5 PT ALM Npsr1	P21
Lrrn3	2.2131e-37	0.384879	0.372	0.164	7.98687e-33	L5 PT ALM Npsr1	P21
Tmem65	3.4777e-37	0.340137	0.37	0.157	1.25507e-32	L5 PT ALM Npsr1	P21
Epb41l4b	1.34695e-36	0.299661	0.574	0.328	4.86102e-32	L5 PT ALM Npsr1	P21
Cpne4	1.76672e-36	0.497355	0.313	0.134	6.37592e-32	L5 PT ALM Npsr1	P21
Mei4	1.83957e-36	0.330764	0.297	0.109	6.63882e-32	L5 PT ALM Npsr1	P21
Vwa5b2	3.1832e-36	0.321933	0.754	0.508	1.14879e-31	L5 PT ALM Npsr1	P21
Asic2	4.12906e-36	0.331608	1	0.997	1.49014e-31	L5 PT ALM Npsr1	P21
Wls	4.30564e-36	0.42097	0.528	0.29	1.55386e-31	L5 PT ALM Npsr1	P21
Wwtr1	5.8955e-36	0.370494	0.429	0.204	2.12763e-31	L5 PT ALM Npsr1	P21
Elf2	7.62024e-36	0.383906	0.504	0.269	2.75007e-31	L5 PT ALM Npsr1	P21
Sel1l3	1.08787e-35	0.386875	0.845	0.645	3.92601e-31	L5 PT ALM Npsr1	P21
AC165953.2	1.24352e-35	0.278165	0.652	0.409	4.48773e-31	L5 PT ALM Npsr1	P21
Glra2	1.96259e-35	0.350606	0.262	0.09	7.08279e-31	L5 PT ALM Npsr1	P21
Terf1	2.98032e-35	0.332312	0.48	0.247	1.07557e-30	L5 PT ALM Npsr1	P21
Spock1	4.03055e-35	0.460281	0.966	0.88	1.45459e-30	L5 PT ALM Npsr1	P21
Pdzrn3	4.62967e-35	0.272817	0.962	0.808	1.6708e-30	L5 PT ALM Npsr1	P21
Wwox	5.49635e-35	0.412416	0.907	0.737	1.98358e-30	L5 PT ALM Npsr1	P21
Focad	6.0562e-35	0.335181	0.983	0.911	2.18562e-30	L5 PT ALM Npsr1	P21
Pcdh10	7.17083e-35	0.316647	0.569	0.327	2.58788e-30	L5 PT ALM Npsr1	P21
Apbb2	8.08795e-35	0.338673	0.968	0.887	2.91886e-30	L5 PT ALM Npsr1	P21
Aifm3	1.50063e-34	0.254298	0.337	0.142	5.41564e-30	L5 PT ALM Npsr1	P21
Mcc	1.69791e-34	0.323145	0.363	0.158	6.12757e-30	L5 PT ALM Npsr1	P21
Cwc22	1.75167e-34	0.489014	0.698	0.46	6.3216e-30	L5 PT ALM Npsr1	P21
Gm14211	2.62304e-34	0.300722	0.248	0.082	9.46629e-30	L5 PT ALM Npsr1	P21
Ktn1	3.80294e-34	0.340515	0.968	0.876	1.37244e-29	L5 PT ALM Npsr1	P21
Sv2c	4.67058e-34	0.427315	0.576	0.336	1.68556e-29	L5 PT ALM Npsr1	P21
Ap3b1	4.88767e-34	0.337656	0.663	0.422	1.76391e-29	L5 PT ALM Npsr1	P21
Aff2	4.98633e-34	0.556	0.793	0.649	1.79952e-29	L5 PT ALM Npsr1	P21
St8sia1	5.58076e-34	0.321938	0.681	0.438	2.01404e-29	L5 PT ALM Npsr1	P21
4930587E11Rik	9.6549e-34	0.326045	0.413	0.198	3.48436e-29	L5 PT ALM Npsr1	P21
Rhobtb3	9.68836e-34	0.261085	0.359	0.161	3.49643e-29	L5 PT ALM Npsr1	P21
Gulp1	1.62144e-33	0.319152	0.162	0.039	5.8516e-29	L5 PT ALM Npsr1	P21
C530008M17Rik	2.78028e-33	0.315865	0.462	0.239	1.00338e-28	L5 PT ALM Npsr1	P21
Thsd7a	3.91969e-33	0.514182	0.34	0.169	1.41458e-28	L5 PT ALM Npsr1	P21
Chrm2	9.62727e-33	0.421944	0.329	0.139	3.47439e-28	L5 PT ALM Npsr1	P21
Srrm2	1.21893e-32	0.321291	0.996	0.979	4.39901e-28	L5 PT ALM Npsr1	P21
Gsdme	1.4708e-32	0.294374	0.624	0.391	5.30797e-28	L5 PT ALM Npsr1	P21
Adamtsl1	5.51526e-32	0.389453	0.242	0.086	1.9904e-27	L5 PT ALM Npsr1	P21
Cadm2	8.82194e-32	0.329932	1	1	3.18375e-27	L5 PT ALM Npsr1	P21
C1ql3	1.03863e-31	0.431523	0.415	0.217	3.74832e-27	L5 PT ALM Npsr1	P21
Dgkb	1.79734e-31	0.404725	0.93	0.793	6.48641e-27	L5 PT ALM Npsr1	P21
Gm2164	5.1963e-31	0.445659	0.809	0.591	1.87529e-26	L5 PT ALM Npsr1	P21
Mgat5	5.70803e-31	0.321955	0.806	0.593	2.05997e-26	L5 PT ALM Npsr1	P21
Gas6	6.55708e-31	0.289501	0.752	0.526	2.36638e-26	L5 PT ALM Npsr1	P21
Crtc3	7.04492e-31	0.271023	0.703	0.473	2.54244e-26	L5 PT ALM Npsr1	P21
AC127697.2	1.06082e-30	0.338807	0.214	0.073	3.82839e-26	L5 PT ALM Npsr1	P21
Galnt7	3.9118e-30	0.396668	0.722	0.505	1.41173e-25	L5 PT ALM Npsr1	P21
CT025619.1	8.65241e-30	0.284022	0.481	0.267	3.12257e-25	L5 PT ALM Npsr1	P21
Osbpl3	1.12302e-29	0.267396	0.872	0.676	4.05286e-25	L5 PT ALM Npsr1	P21
Pacsin2	1.2436e-29	0.252395	0.434	0.229	4.48803e-25	L5 PT ALM Npsr1	P21
Rnpc3	1.3717e-29	0.262253	0.742	0.521	4.95031e-25	L5 PT ALM Npsr1	P21
Asap2	1.71072e-29	0.275438	0.722	0.5	6.1738e-25	L5 PT ALM Npsr1	P21
A830082K12Rik	2.31319e-29	0.256494	0.472	0.262	8.34808e-25	L5 PT ALM Npsr1	P21
Ppp1r7	3.53058e-29	0.257673	0.443	0.237	1.27415e-24	L5 PT ALM Npsr1	P21
Gm20754	3.72405e-29	0.456257	0.91	0.838	1.34397e-24	L5 PT ALM Npsr1	P21
St7	5.25817e-29	0.338921	0.907	0.754	1.89762e-24	L5 PT ALM Npsr1	P21
Zranb2	5.46071e-29	0.28009	0.974	0.867	1.97072e-24	L5 PT ALM Npsr1	P21
Kcnn3	8.91338e-29	0.25009	0.198	0.063	3.21675e-24	L5 PT ALM Npsr1	P21
Lrrc28	1.05429e-28	0.255067	0.525	0.31	3.80483e-24	L5 PT ALM Npsr1	P21
Grik2	1.27699e-28	0.386335	0.994	0.993	4.60851e-24	L5 PT ALM Npsr1	P21
Arsb	1.79687e-28	0.2641	0.557	0.341	6.48471e-24	L5 PT ALM Npsr1	P21
Galnt13	2.13556e-28	0.326889	0.974	0.919	7.707e-24	L5 PT ALM Npsr1	P21
Fam189a1	2.85744e-28	0.325636	0.972	0.897	1.03122e-23	L5 PT ALM Npsr1	P21
Dgki	3.67651e-28	0.357596	0.99	0.97	1.32682e-23	L5 PT ALM Npsr1	P21
Sfxn5	6.34265e-28	0.297489	0.838	0.644	2.289e-23	L5 PT ALM Npsr1	P21
Camk2g	7.01955e-28	0.306191	0.794	0.589	2.53329e-23	L5 PT ALM Npsr1	P21
Gm45881	1.13811e-27	0.254333	0.313	0.14	4.10734e-23	L5 PT ALM Npsr1	P21
Prex2	1.19217e-27	0.267979	0.379	0.19	4.30244e-23	L5 PT ALM Npsr1	P21
Ppfibp1	2.64554e-27	0.402286	0.688	0.498	9.5475e-23	L5 PT ALM Npsr1	P21
Ypel2	4.18941e-27	0.256312	0.52	0.312	1.51192e-22	L5 PT ALM Npsr1	P21
Cadm3	4.55054e-27	0.310185	0.497	0.289	1.64224e-22	L5 PT ALM Npsr1	P21
Gbe1	5.22915e-27	0.407035	0.303	0.141	1.88715e-22	L5 PT ALM Npsr1	P21
Hdac9	7.96617e-27	0.476577	0.977	0.955	2.87491e-22	L5 PT ALM Npsr1	P21
Hivep3	8.71325e-27	0.26726	0.99	0.945	3.14453e-22	L5 PT ALM Npsr1	P21
Sh3gl2	1.03367e-26	0.372197	0.907	0.809	3.7304e-22	L5 PT ALM Npsr1	P21
Nr6a1	1.67812e-26	0.335316	0.797	0.609	6.05617e-22	L5 PT ALM Npsr1	P21
Pced1b	2.46448e-26	0.258149	0.448	0.252	8.89406e-22	L5 PT ALM Npsr1	P21
Tshz3	3.01218e-26	0.3649	0.738	0.547	1.08707e-21	L5 PT ALM Npsr1	P21
Mgll	8.77692e-26	0.360192	0.503	0.304	3.1675e-21	L5 PT ALM Npsr1	P21
Ntrk2	1.59156e-25	0.264685	0.996	0.983	5.74377e-21	L5 PT ALM Npsr1	P21
Grik1	1.69844e-25	0.356736	0.204	0.071	6.12949e-21	L5 PT ALM Npsr1	P21
Osbpl6	2.04589e-25	0.2518	0.99	0.95	7.38341e-21	L5 PT ALM Npsr1	P21
Ppp3ca	2.17928e-25	0.264329	0.993	0.981	7.86479e-21	L5 PT ALM Npsr1	P21
Macrod2	3.14183e-25	0.339591	0.999	0.999	1.13385e-20	L5 PT ALM Npsr1	P21
Peak1	3.58273e-25	0.402895	0.636	0.459	1.29297e-20	L5 PT ALM Npsr1	P21
Dock7	5.39244e-25	0.314977	0.746	0.551	1.94608e-20	L5 PT ALM Npsr1	P21
Camk2n1	5.79534e-25	0.272344	0.418	0.229	2.09148e-20	L5 PT ALM Npsr1	P21
Adamts17	1.09983e-24	0.28537	0.362	0.184	3.96917e-20	L5 PT ALM Npsr1	P21
Dixdc1	1.67336e-24	0.258756	0.512	0.313	6.039e-20	L5 PT ALM Npsr1	P21
Arntl	1.94431e-24	0.278734	0.784	0.593	7.01682e-20	L5 PT ALM Npsr1	P21
Herc4	2.67027e-24	0.256603	0.722	0.52	9.63673e-20	L5 PT ALM Npsr1	P21
Stxbp1	4.79411e-24	0.315097	0.911	0.796	1.73015e-19	L5 PT ALM Npsr1	P21
Tnrc6a	1.25474e-23	0.261583	0.739	0.543	4.52822e-19	L5 PT ALM Npsr1	P21
Syt2	1.73279e-23	0.426436	0.378	0.211	6.25348e-19	L5 PT ALM Npsr1	P21
Naaladl2	1.95604e-23	0.258009	0.679	0.48	7.05917e-19	L5 PT ALM Npsr1	P21
Slco3a1	2.39444e-23	0.352845	0.854	0.71	8.64131e-19	L5 PT ALM Npsr1	P21
Dpysl5	2.49258e-23	0.289073	0.434	0.248	8.99548e-19	L5 PT ALM Npsr1	P21
Il1rap	3.32184e-23	0.373782	0.672	0.48	1.19882e-18	L5 PT ALM Npsr1	P21
Cdkl5	5.13521e-23	0.298019	0.91	0.785	1.85324e-18	L5 PT ALM Npsr1	P21
Gk	5.56738e-23	0.264808	0.528	0.333	2.00921e-18	L5 PT ALM Npsr1	P21
A830018L16Rik	8.64019e-23	0.307834	0.966	0.884	3.11816e-18	L5 PT ALM Npsr1	P21
Camta1	9.31239e-23	0.26315	1	0.992	3.36075e-18	L5 PT ALM Npsr1	P21
Pdzd2	9.83525e-23	0.350174	0.952	0.898	3.54944e-18	L5 PT ALM Npsr1	P21
Cacna1c	1.1804e-22	0.333838	0.936	0.842	4.25994e-18	L5 PT ALM Npsr1	P21
Dgkh	1.34958e-22	0.261449	0.952	0.848	4.87051e-18	L5 PT ALM Npsr1	P21
Fmn1	1.376e-22	0.318134	0.968	0.888	4.96583e-18	L5 PT ALM Npsr1	P21
Clcn2	1.41285e-22	0.270157	0.672	0.476	5.09884e-18	L5 PT ALM Npsr1	P21
Prrg1	1.93821e-22	0.263846	0.341	0.176	6.99481e-18	L5 PT ALM Npsr1	P21
Slc39a10	2.57012e-22	0.257612	0.449	0.265	9.27531e-18	L5 PT ALM Npsr1	P21
Pantr1	3.37914e-22	0.264919	0.563	0.369	1.2195e-17	L5 PT ALM Npsr1	P21
Galntl6	9.25348e-22	0.465333	0.911	0.906	3.33949e-17	L5 PT ALM Npsr1	P21
Cdk14	3.07429e-21	0.314561	0.803	0.638	1.10948e-16	L5 PT ALM Npsr1	P21
Enpp2	3.40826e-21	0.264674	0.501	0.316	1.23001e-16	L5 PT ALM Npsr1	P21
Syt4	3.47212e-21	0.306771	0.496	0.311	1.25305e-16	L5 PT ALM Npsr1	P21
Ptprt	5.24512e-21	0.384415	0.73	0.568	1.89291e-16	L5 PT ALM Npsr1	P21
Nav1	1.0076e-20	0.258101	0.936	0.816	3.63634e-16	L5 PT ALM Npsr1	P21
Cdh8	1.45372e-20	0.35549	0.911	0.851	5.24634e-16	L5 PT ALM Npsr1	P21
Rgs17	2.09775e-20	0.28472	0.783	0.612	7.57058e-16	L5 PT ALM Npsr1	P21
Dcx	2.19062e-20	0.288534	0.593	0.408	7.90573e-16	L5 PT ALM Npsr1	P21
Rnf13	2.35814e-20	0.287158	0.638	0.452	8.5103e-16	L5 PT ALM Npsr1	P21
Gls	4.0385e-20	0.267708	0.945	0.88	1.45746e-15	L5 PT ALM Npsr1	P21
Rnf152	4.73355e-20	0.25236	0.397	0.23	1.70829e-15	L5 PT ALM Npsr1	P21
Trpc7	7.1728e-20	0.27184	0.233	0.103	2.58859e-15	L5 PT ALM Npsr1	P21
Man1a2	9.35139e-20	0.260101	0.78	0.61	3.37482e-15	L5 PT ALM Npsr1	P21
Gria4	9.95145e-20	0.301466	0.946	0.86	3.59138e-15	L5 PT ALM Npsr1	P21
Lrch1	1.10954e-19	0.269402	0.777	0.608	4.00422e-15	L5 PT ALM Npsr1	P21
Scai	1.16695e-19	0.251639	0.942	0.856	4.21141e-15	L5 PT ALM Npsr1	P21
Epha6	1.48671e-19	0.270014	0.981	0.916	5.3654e-15	L5 PT ALM Npsr1	P21
Clvs1	6.46571e-19	0.25714	0.841	0.688	2.33341e-14	L5 PT ALM Npsr1	P21
Unc13b	6.95063e-19	0.30686	0.69	0.52	2.50841e-14	L5 PT ALM Npsr1	P21
Srrm3	9.05043e-19	0.26819	0.885	0.773	3.26621e-14	L5 PT ALM Npsr1	P21
Sbf2	6.75974e-18	0.282599	0.824	0.694	2.43952e-13	L5 PT ALM Npsr1	P21
Pde9a	1.13553e-17	0.35874	0.424	0.281	4.098e-13	L5 PT ALM Npsr1	P21
Cadps2	2.14439e-17	0.538791	0.808	0.704	7.73888e-13	L5 PT ALM Npsr1	P21
Pak7	2.61375e-17	0.360058	0.862	0.749	9.43276e-13	L5 PT ALM Npsr1	P21
Efr3a	3.93805e-17	0.252165	0.918	0.824	1.4212e-12	L5 PT ALM Npsr1	P21
Myt1l	8.07325e-17	0.253172	0.991	0.97	2.91356e-12	L5 PT ALM Npsr1	P21
Sh3d19	8.0802e-17	0.254584	0.347	0.201	2.91606e-12	L5 PT ALM Npsr1	P21
Plxdc1	2.60017e-16	0.257064	0.423	0.267	9.38375e-12	L5 PT ALM Npsr1	P21
Sez6l	8.95119e-16	0.278374	0.93	0.85	3.23039e-11	L5 PT ALM Npsr1	P21
Gm13629	9.69532e-16	0.299581	0.573	0.41	3.49894e-11	L5 PT ALM Npsr1	P21
Prkca	1.7475e-15	0.357837	0.898	0.861	6.30654e-11	L5 PT ALM Npsr1	P21
Dip2a	2.83978e-15	0.258089	0.617	0.458	1.02485e-10	L5 PT ALM Npsr1	P21
Nwd2	8.96163e-15	0.323892	0.637	0.492	3.23416e-10	L5 PT ALM Npsr1	P21
Plcl1	6.68611e-14	0.269642	0.774	0.635	2.41295e-09	L5 PT ALM Npsr1	P21
Ostm1	1.7213e-12	0.292866	0.239	0.131	6.21199e-08	L5 PT ALM Npsr1	P21
Cacnb2	4.59113e-12	0.328368	0.566	0.466	1.65689e-07	L5 PT ALM Npsr1	P21
Xkr4	6.00555e-12	0.275389	0.985	0.964	2.16734e-07	L5 PT ALM Npsr1	P21
Rorb	2.44277e-11	0.294998	0.395	0.268	8.81573e-07	L5 PT ALM Npsr1	P21
Grm3	9.60613e-11	0.378208	0.748	0.68	3.46676e-06	L5 PT ALM Npsr1	P21
Gpr158	2.37453e-10	0.256496	0.845	0.768	8.56943e-06	L5 PT ALM Npsr1	P21
Prkg1	9.80319e-10	0.2585	0.305	0.206	3.53787e-05	L5 PT ALM Npsr1	P21
Ptprk	5.11075e-09	0.277919	0.554	0.441	0.000184442	L5 PT ALM Npsr1	P21
Unc5d	1.53556e-07	0.349051	0.379	0.29	0.00554168	L5 PT ALM Npsr1	P21
Zfp804a	2.31307e-06	0.257725	0.799	0.72	0.0834764	L5 PT ALM Npsr1	P21
Trpm3	0.000738965	0.251923	0.534	0.459	1	L5 PT ALM Npsr1	P21
St6galnac5	0	2.21403	0.855	0.31	0	L5 PT ALM Slco2a1	P12
Astn2	0	1.69844	0.944	0.628	0	L5 PT ALM Slco2a1	P12
St6galnac3	0	1.4139	0.939	0.668	0	L5 PT ALM Slco2a1	P12
Pigk	0	1.1041	0.751	0.349	0	L5 PT ALM Slco2a1	P12
Nfia	0	0.989511	0.914	0.586	0	L5 PT ALM Slco2a1	P12
Nfib	3.56402e-300	0.601072	0.984	0.928	1.28622e-295	L5 PT ALM Slco2a1	P12
A930011G23Rik	1.53446e-299	1.04763	0.445	0.098	5.5377e-295	L5 PT ALM Slco2a1	P12
Cdh13	1.4352e-297	0.649717	0.982	0.784	5.17949e-293	L5 PT ALM Slco2a1	P12
Opcml	3.39752e-283	0.543251	0.999	0.998	1.22613e-278	L5 PT ALM Slco2a1	P12
Cntn4	1.58265e-277	0.870709	0.953	0.777	5.71163e-273	L5 PT ALM Slco2a1	P12
Gm26871	6.92558e-273	1.52284	0.493	0.156	2.49937e-268	L5 PT ALM Slco2a1	P12
Gm38073	1.82205e-247	1.04542	0.473	0.136	6.57561e-243	L5 PT ALM Slco2a1	P12
Dlg2.1	4.89329e-246	1.66866	0.499	0.162	1.76594e-241	L5 PT ALM Slco2a1	P12
Gm27247	2.9833e-238	0.517971	0.451	0.152	1.07664e-233	L5 PT ALM Slco2a1	P12
Gm2163	1.10865e-236	0.991555	0.456	0.131	4.00102e-232	L5 PT ALM Slco2a1	P12
Trerf1	2.02293e-234	0.818724	0.483	0.154	7.30054e-230	L5 PT ALM Slco2a1	P12
Cacnb4	3.16011e-233	0.557902	0.983	0.944	1.14045e-228	L5 PT ALM Slco2a1	P12
9330162G02Rik	2.57249e-231	1.21714	0.493	0.157	9.28385e-227	L5 PT ALM Slco2a1	P12
Rian	4.08195e-231	1.26552	0.497	0.159	1.47313e-226	L5 PT ALM Slco2a1	P12
Gm12394	1.72004e-230	0.902543	0.479	0.146	6.20745e-226	L5 PT ALM Slco2a1	P12
Snhg14	4.84316e-230	1.23042	0.497	0.159	1.74785e-225	L5 PT ALM Slco2a1	P12
Pcdh7	1.57895e-227	0.521812	0.991	0.943	5.69828e-223	L5 PT ALM Slco2a1	P12
Gm17167	1.12589e-225	0.967873	0.475	0.147	4.06324e-221	L5 PT ALM Slco2a1	P12
Zfp804b	3.36683e-212	0.948291	0.808	0.499	1.21505e-207	L5 PT ALM Slco2a1	P12
2610203C20Rik	2.39616e-211	0.668311	0.447	0.138	8.64749e-207	L5 PT ALM Slco2a1	P12
Sgcz	6.64497e-210	0.552613	0.995	0.973	2.3981e-205	L5 PT ALM Slco2a1	P12
Gm4258	2.3747e-208	0.668716	0.437	0.131	8.57006e-204	L5 PT ALM Slco2a1	P12
Gm44560	2.5033e-208	0.649357	0.448	0.138	9.03415e-204	L5 PT ALM Slco2a1	P12
Mir99ahg	3.40649e-208	0.726554	0.443	0.135	1.22937e-203	L5 PT ALM Slco2a1	P12
Cntnap5c	2.68753e-206	0.666722	0.695	0.355	9.69903e-202	L5 PT ALM Slco2a1	P12
Gm15800	4.95213e-205	0.600207	0.449	0.144	1.78717e-200	L5 PT ALM Slco2a1	P12
Gm16432	2.28613e-202	0.643829	0.43	0.13	8.25042e-198	L5 PT ALM Slco2a1	P12
Slc35f1	7.64055e-199	0.768146	0.806	0.517	2.7574e-194	L5 PT ALM Slco2a1	P12
Whsc1l1	3.56098e-198	0.622679	0.436	0.136	1.28512e-193	L5 PT ALM Slco2a1	P12
Ndst3	1.6521e-196	0.773699	0.77	0.468	5.96226e-192	L5 PT ALM Slco2a1	P12
A330023F24Rik	1.68764e-195	0.619738	0.42	0.126	6.09052e-191	L5 PT ALM Slco2a1	P12
Ptpre	1.03591e-194	0.511408	0.705	0.37	3.73849e-190	L5 PT ALM Slco2a1	P12
A230103L15Rik	7.12605e-194	0.556266	0.409	0.12	2.57172e-189	L5 PT ALM Slco2a1	P12
Gm28928	5.68681e-191	0.480446	0.999	0.997	2.05231e-186	L5 PT ALM Slco2a1	P12
Zcchc16	5.91112e-191	0.716585	0.376	0.101	2.13326e-186	L5 PT ALM Slco2a1	P12
Grik4	3.04398e-188	0.578147	0.632	0.303	1.09854e-183	L5 PT ALM Slco2a1	P12
Dpyd	1.56327e-185	0.64531	0.681	0.361	5.64167e-181	L5 PT ALM Slco2a1	P12
Spag5	2.01836e-184	0.768969	0.423	0.135	7.28407e-180	L5 PT ALM Slco2a1	P12
Grid2	6.2243e-181	0.438715	0.992	0.966	2.24629e-176	L5 PT ALM Slco2a1	P12
Sv2b	5.14758e-180	0.534476	0.933	0.784	1.85771e-175	L5 PT ALM Slco2a1	P12
Zswim6	8.22131e-180	0.586324	0.415	0.133	2.96699e-175	L5 PT ALM Slco2a1	P12
Cntn1	9.52181e-177	0.463083	0.973	0.907	3.43632e-172	L5 PT ALM Slco2a1	P12
Gm1043	1.56174e-176	0.51465	0.401	0.126	5.63617e-172	L5 PT ALM Slco2a1	P12
Fras1	5.1145e-174	0.713229	0.762	0.48	1.84577e-169	L5 PT ALM Slco2a1	P12
1500004A13Rik	1.17521e-172	0.619187	0.4	0.127	4.24122e-168	L5 PT ALM Slco2a1	P12
A330076H08Rik	1.49555e-172	0.430266	0.401	0.137	5.39731e-168	L5 PT ALM Slco2a1	P12
Pde1a	2.17383e-172	0.798122	0.841	0.615	7.84512e-168	L5 PT ALM Slco2a1	P12
Dlgap1	4.36342e-171	0.311805	0.999	0.997	1.57471e-166	L5 PT ALM Slco2a1	P12
Tmeff1	3.40791e-170	0.544998	0.58	0.273	1.22988e-165	L5 PT ALM Slco2a1	P12
Gm37899	2.73806e-168	0.488412	0.385	0.119	9.88139e-164	L5 PT ALM Slco2a1	P12
Man1a	4.15227e-168	0.539334	0.63	0.319	1.49851e-163	L5 PT ALM Slco2a1	P12
RP24-349L11.1	1.25987e-162	0.445318	0.33	0.088	4.54676e-158	L5 PT ALM Slco2a1	P12
Lgi1	6.62264e-162	0.499629	0.716	0.412	2.39005e-157	L5 PT ALM Slco2a1	P12
Tmem181b-ps	5.82045e-159	0.446608	0.37	0.116	2.10054e-154	L5 PT ALM Slco2a1	P12
Ccdc64	9.12529e-158	0.391763	0.37	0.12	3.29323e-153	L5 PT ALM Slco2a1	P12
Brinp1	2.06059e-157	0.442471	0.975	0.914	7.43645e-153	L5 PT ALM Slco2a1	P12
Ccdc171	5.30955e-156	0.5148	0.49	0.206	1.91616e-151	L5 PT ALM Slco2a1	P12
RP24-263E2.3	9.79066e-156	0.377426	0.372	0.124	3.53335e-151	L5 PT ALM Slco2a1	P12
Nckap5	3.52622e-155	0.592006	0.565	0.272	1.27258e-150	L5 PT ALM Slco2a1	P12
Gm26804	3.57924e-155	0.459566	0.38	0.125	1.29171e-150	L5 PT ALM Slco2a1	P12
RP24-274B19.1	3.58148e-155	0.424749	0.376	0.127	1.29252e-150	L5 PT ALM Slco2a1	P12
Gm44562	6.01959e-152	0.411872	0.339	0.099	2.17241e-147	L5 PT ALM Slco2a1	P12
Xylt1	8.01131e-151	0.407509	0.95	0.768	2.8912e-146	L5 PT ALM Slco2a1	P12
C77370	1.62747e-149	0.421235	0.309	0.083	5.87337e-145	L5 PT ALM Slco2a1	P12
Ppm1l	6.28485e-149	0.509022	0.913	0.763	2.26814e-144	L5 PT ALM Slco2a1	P12
Fam135b	7.51007e-148	0.473699	0.943	0.838	2.71031e-143	L5 PT ALM Slco2a1	P12
Bre	2.97872e-147	0.391958	0.327	0.095	1.07499e-142	L5 PT ALM Slco2a1	P12
Dfna5	6.04864e-147	0.382353	0.321	0.091	2.18289e-142	L5 PT ALM Slco2a1	P12
Gbas	3.51396e-146	0.375249	0.318	0.09	1.26815e-141	L5 PT ALM Slco2a1	P12
Clmp	2.11971e-145	0.469769	0.483	0.209	7.64981e-141	L5 PT ALM Slco2a1	P12
Crym	7.59522e-145	0.428794	0.467	0.198	2.74104e-140	L5 PT ALM Slco2a1	P12
Ptprg	2.23504e-144	0.440478	0.856	0.604	8.06605e-140	L5 PT ALM Slco2a1	P12
RP23-331E5.5	1.42037e-142	0.364358	0.329	0.099	5.12598e-138	L5 PT ALM Slco2a1	P12
Nrg3	2.3213e-142	0.258825	1	0.999	8.37734e-138	L5 PT ALM Slco2a1	P12
Whsc1	3.07517e-140	0.409351	0.339	0.107	1.1098e-135	L5 PT ALM Slco2a1	P12
Kcnq1	1.10193e-139	0.403527	0.346	0.112	3.97675e-135	L5 PT ALM Slco2a1	P12
Dok6	1.50436e-138	0.484828	0.92	0.789	5.42908e-134	L5 PT ALM Slco2a1	P12
Erdr1	4.66699e-138	0.41192	0.325	0.101	1.68427e-133	L5 PT ALM Slco2a1	P12
Gucy1b3	6.17447e-138	0.370387	0.331	0.104	2.2283e-133	L5 PT ALM Slco2a1	P12
Pid1	2.074e-137	0.534807	0.861	0.638	7.48486e-133	L5 PT ALM Slco2a1	P12
Necab1	3.44284e-137	0.466765	0.641	0.359	1.24249e-132	L5 PT ALM Slco2a1	P12
Far2	3.86934e-137	0.4913	0.727	0.456	1.39641e-132	L5 PT ALM Slco2a1	P12
Fstl5	2.05373e-136	0.522361	0.764	0.496	7.41171e-132	L5 PT ALM Slco2a1	P12
Neto1	8.72063e-136	0.498892	0.896	0.732	3.14719e-131	L5 PT ALM Slco2a1	P12
Htr1f	1.26007e-135	0.510489	0.909	0.726	4.54746e-131	L5 PT ALM Slco2a1	P12
4930578G10Rik	3.52394e-134	0.32437	0.282	0.075	1.27176e-129	L5 PT ALM Slco2a1	P12
Gm44511	1.14351e-132	0.442203	0.349	0.119	4.12683e-128	L5 PT ALM Slco2a1	P12
6820431F20Rik	1.29164e-131	0.323641	0.3	0.087	4.6614e-127	L5 PT ALM Slco2a1	P12
Fam134b	1.40164e-131	0.34723	0.296	0.085	5.05839e-127	L5 PT ALM Slco2a1	P12
Glb1l	1.73558e-131	0.397557	0.388	0.148	6.26355e-127	L5 PT ALM Slco2a1	P12
Pex5l	2.67221e-131	0.275893	0.999	0.996	9.64372e-127	L5 PT ALM Slco2a1	P12
Dner	7.75972e-130	0.37729	0.62	0.351	2.8004e-125	L5 PT ALM Slco2a1	P12
Grid1	4.51642e-129	0.436983	0.92	0.746	1.62993e-124	L5 PT ALM Slco2a1	P12
Slmo1	2.18476e-128	0.338976	0.306	0.093	7.88457e-124	L5 PT ALM Slco2a1	P12
Dleu2	2.38874e-127	0.363025	0.31	0.097	8.62072e-123	L5 PT ALM Slco2a1	P12
Fam63b	1.63372e-126	0.322841	0.284	0.08	5.89594e-122	L5 PT ALM Slco2a1	P12
Fam178a	2.32973e-125	0.336678	0.323	0.107	8.40776e-121	L5 PT ALM Slco2a1	P12
Igsf21	2.32583e-124	0.412159	0.929	0.76	8.39368e-120	L5 PT ALM Slco2a1	P12
Kcnd3	6.98934e-124	0.416939	0.531	0.271	2.52238e-119	L5 PT ALM Slco2a1	P12
Prickle2	2.89053e-122	0.357364	0.986	0.934	1.04316e-117	L5 PT ALM Slco2a1	P12
Mia2.1	2.63897e-120	0.323793	0.286	0.086	9.52378e-116	L5 PT ALM Slco2a1	P12
2610005L07Rik	1.84057e-119	0.31062	0.29	0.089	6.64242e-115	L5 PT ALM Slco2a1	P12
Thsd7b	9.76234e-119	0.451661	0.393	0.161	3.52313e-114	L5 PT ALM Slco2a1	P12
Qk	1.23167e-118	0.412378	0.504	0.251	4.44497e-114	L5 PT ALM Slco2a1	P12
Snca	1.83478e-118	0.458581	0.648	0.387	6.62154e-114	L5 PT ALM Slco2a1	P12
Kcnip4	5.44413e-118	0.363095	1	1	1.96473e-113	L5 PT ALM Slco2a1	P12
Gm43174	7.57049e-117	0.292116	0.291	0.092	2.73211e-112	L5 PT ALM Slco2a1	P12
Rfwd2	1.91554e-116	0.338257	0.291	0.092	6.91299e-112	L5 PT ALM Slco2a1	P12
Hdgfrp3	8.10035e-116	0.293283	0.266	0.077	2.92334e-111	L5 PT ALM Slco2a1	P12
AI846148	1.40658e-115	0.271641	0.25	0.067	5.07621e-111	L5 PT ALM Slco2a1	P12
Gm42616	1.20868e-114	0.286246	0.284	0.089	4.36202e-110	L5 PT ALM Slco2a1	P12
Gm37340	1.43816e-114	0.321094	0.26	0.073	5.19017e-110	L5 PT ALM Slco2a1	P12
Nr4a3	3.5257e-113	0.300572	0.264	0.08	1.27239e-108	L5 PT ALM Slco2a1	P12
Grm8	1.26253e-112	0.415353	0.946	0.837	4.55633e-108	L5 PT ALM Slco2a1	P12
Dpp10	5.85377e-112	0.30964	0.994	0.982	2.11257e-107	L5 PT ALM Slco2a1	P12
Epo	1.85958e-111	0.30415	0.298	0.099	6.71103e-107	L5 PT ALM Slco2a1	P12
Lnpk1	2.02286e-111	0.26533	0.255	0.073	7.30032e-107	L5 PT ALM Slco2a1	P12
Cdh6	2.0335e-111	0.401953	0.857	0.642	7.33869e-107	L5 PT ALM Slco2a1	P12
Cntnap4	6.7964e-110	0.407521	0.482	0.242	2.45275e-105	L5 PT ALM Slco2a1	P12
Gm43175	2.22472e-108	0.279963	0.268	0.082	8.0288e-104	L5 PT ALM Slco2a1	P12
Pip5k1b	7.70887e-108	0.333443	0.36	0.151	2.78205e-103	L5 PT ALM Slco2a1	P12
B3galt1	4.55459e-107	0.376663	0.943	0.821	1.64371e-102	L5 PT ALM Slco2a1	P12
Mpped2	7.0132e-106	0.413393	0.83	0.616	2.53099e-101	L5 PT ALM Slco2a1	P12
Gm28153	8.93236e-106	0.383583	0.272	0.086	3.2236e-101	L5 PT ALM Slco2a1	P12
Grm3	2.12216e-105	0.410523	0.853	0.652	7.65866e-101	L5 PT ALM Slco2a1	P12
Lypd1	1.28445e-104	0.292754	0.292	0.111	4.63546e-100	L5 PT ALM Slco2a1	P12
Lace1	4.19879e-104	0.28002	0.25	0.074	1.5153e-99	L5 PT ALM Slco2a1	P12
Rnf217	1.31074e-103	0.353341	0.612	0.367	4.73034e-99	L5 PT ALM Slco2a1	P12
Gm14172	1.94338e-102	0.268424	0.246	0.073	7.01347e-98	L5 PT ALM Slco2a1	P12
Diaph2	4.31731e-101	0.414063	0.866	0.687	1.55807e-96	L5 PT ALM Slco2a1	P12
Luzp2	4.53643e-101	0.580173	0.718	0.494	1.63715e-96	L5 PT ALM Slco2a1	P12
Mpdz	8.01735e-100	0.312069	0.525	0.294	2.89338e-95	L5 PT ALM Slco2a1	P12
Cdh10	1.1946e-99	0.457865	0.816	0.612	4.31118e-95	L5 PT ALM Slco2a1	P12
Pcdh17	1.74613e-99	0.374228	0.551	0.314	6.30162e-95	L5 PT ALM Slco2a1	P12
Reck	2.36463e-98	0.328333	0.459	0.236	8.53372e-94	L5 PT ALM Slco2a1	P12
2210408F21Rik	3.52195e-98	0.252636	0.273	0.099	1.27104e-93	L5 PT ALM Slco2a1	P12
Fam65b	9.01649e-98	0.2638	0.266	0.09	3.25396e-93	L5 PT ALM Slco2a1	P12
Khdrbs3	1.89572e-96	0.302109	0.986	0.953	6.84145e-92	L5 PT ALM Slco2a1	P12
Zbtb16	2.63444e-96	0.426807	0.711	0.48	9.50742e-92	L5 PT ALM Slco2a1	P12
Gng12	1.32282e-95	0.30494	0.485	0.263	4.77392e-91	L5 PT ALM Slco2a1	P12
Rimbp2	1.71803e-95	0.34868	0.938	0.811	6.20018e-91	L5 PT ALM Slco2a1	P12
Lyrm4	1.8981e-95	0.269685	0.319	0.13	6.85005e-91	L5 PT ALM Slco2a1	P12
Kcnj3	2.00277e-95	0.412453	0.815	0.617	7.2278e-91	L5 PT ALM Slco2a1	P12
3110035E14Rik	5.06661e-95	0.268066	0.427	0.217	1.82849e-90	L5 PT ALM Slco2a1	P12
Zeb2	5.77109e-95	0.406468	0.918	0.778	2.08273e-90	L5 PT ALM Slco2a1	P12
Kcnmb4	2.35812e-94	0.36145	0.614	0.38	8.51022e-90	L5 PT ALM Slco2a1	P12
Stam2	2.73418e-94	0.340046	0.491	0.266	9.86738e-90	L5 PT ALM Slco2a1	P12
Tox	1.21834e-92	0.330479	0.947	0.832	4.39688e-88	L5 PT ALM Slco2a1	P12
Msra	1.5848e-92	0.36137	0.953	0.867	5.71938e-88	L5 PT ALM Slco2a1	P12
Zdhhc14	1.94197e-92	0.308376	0.675	0.447	7.00839e-88	L5 PT ALM Slco2a1	P12
Kcnh1	2.97536e-92	0.299409	0.604	0.377	1.07378e-87	L5 PT ALM Slco2a1	P12
Plxna4	9.84415e-92	0.381353	0.906	0.769	3.55266e-87	L5 PT ALM Slco2a1	P12
Prr16	9.8149e-91	0.444115	0.853	0.692	3.5421e-86	L5 PT ALM Slco2a1	P12
Cacnb2	4.81363e-90	0.262591	0.594	0.376	1.73719e-85	L5 PT ALM Slco2a1	P12
Fhod3	8.8869e-90	0.337971	0.9	0.734	3.20719e-85	L5 PT ALM Slco2a1	P12
2011-03-01	2.95439e-89	0.400001	0.746	0.534	1.06621e-84	L5 PT ALM Slco2a1	P12
Ppm1e	6.32056e-88	0.296267	0.978	0.944	2.28103e-83	L5 PT ALM Slco2a1	P12
Enox1	1.36261e-87	0.37803	0.951	0.867	4.91751e-83	L5 PT ALM Slco2a1	P12
Celf4	4.21718e-87	0.319285	0.948	0.826	1.52194e-82	L5 PT ALM Slco2a1	P12
Ncam2	1.50838e-86	0.319064	0.978	0.926	5.44359e-82	L5 PT ALM Slco2a1	P12
Mgat4c	4.00106e-85	0.307728	0.82	0.622	1.44394e-80	L5 PT ALM Slco2a1	P12
Pde4a	2.69606e-84	0.317243	0.797	0.596	9.72981e-80	L5 PT ALM Slco2a1	P12
Ephb1	4.51147e-84	0.350935	0.823	0.63	1.62814e-79	L5 PT ALM Slco2a1	P12
Cacna1e	5.63857e-84	0.298648	0.966	0.9	2.0349e-79	L5 PT ALM Slco2a1	P12
Hecw2	7.31924e-84	0.329646	0.949	0.871	2.64144e-79	L5 PT ALM Slco2a1	P12
Rorb	3.32513e-83	0.264043	0.508	0.303	1.20001e-78	L5 PT ALM Slco2a1	P12
Greb1l	8.78793e-83	0.301811	0.364	0.173	3.17148e-78	L5 PT ALM Slco2a1	P12
Tlk1	2.36161e-80	0.291383	0.681	0.468	8.52281e-76	L5 PT ALM Slco2a1	P12
Npas2	4.68244e-80	0.296528	0.768	0.564	1.68984e-75	L5 PT ALM Slco2a1	P12
Meis2	8.8514e-79	0.345595	0.85	0.673	3.19438e-74	L5 PT ALM Slco2a1	P12
Lmo3	1.0141e-78	0.27768	0.675	0.465	3.65979e-74	L5 PT ALM Slco2a1	P12
Apba1	1.8145e-78	0.360158	0.933	0.839	6.54835e-74	L5 PT ALM Slco2a1	P12
Trps1	2.06716e-76	0.29917	0.313	0.142	7.46017e-72	L5 PT ALM Slco2a1	P12
Alcam	2.93301e-76	0.318216	0.624	0.415	1.05849e-71	L5 PT ALM Slco2a1	P12
Tnr	5.05721e-76	0.337547	0.855	0.68	1.8251e-71	L5 PT ALM Slco2a1	P12
Slc44a5	1.08051e-75	0.334834	0.343	0.163	3.89946e-71	L5 PT ALM Slco2a1	P12
Pde4b	5.06247e-74	0.25455	0.76	0.565	1.82699e-69	L5 PT ALM Slco2a1	P12
Trpc3	2.29878e-73	0.254938	0.276	0.118	8.29606e-69	L5 PT ALM Slco2a1	P12
Map3k5	2.39871e-72	0.293584	0.661	0.458	8.65669e-68	L5 PT ALM Slco2a1	P12
Gap43	7.6978e-72	0.283966	0.82	0.641	2.77806e-67	L5 PT ALM Slco2a1	P12
Kcnab1	3.13727e-70	0.378904	0.478	0.284	1.13221e-65	L5 PT ALM Slco2a1	P12
Fmn2	5.18036e-70	0.322243	0.857	0.71	1.86954e-65	L5 PT ALM Slco2a1	P12
Zfp608	3.85303e-69	0.311985	0.393	0.211	1.39052e-64	L5 PT ALM Slco2a1	P12
Sertad2	5.87277e-69	0.328516	0.778	0.597	2.11942e-64	L5 PT ALM Slco2a1	P12
Zswim5	2.31287e-68	0.266666	0.431	0.248	8.3469e-64	L5 PT ALM Slco2a1	P12
Tmem132d	4.32705e-67	0.271648	0.877	0.726	1.56159e-62	L5 PT ALM Slco2a1	P12
Lrrc4c	1.01036e-66	0.25234	0.985	0.937	3.64628e-62	L5 PT ALM Slco2a1	P12
Prkca	3.33705e-66	0.261188	0.875	0.72	1.20431e-61	L5 PT ALM Slco2a1	P12
Thrb	2.63137e-65	0.252725	0.979	0.93	9.49636e-61	L5 PT ALM Slco2a1	P12
Kctd1	7.86414e-65	0.255813	0.433	0.255	2.83809e-60	L5 PT ALM Slco2a1	P12
Ppp2r2b	1.55347e-62	0.251618	0.987	0.97	5.60632e-58	L5 PT ALM Slco2a1	P12
Klhl2	1.71702e-61	0.262458	0.79	0.618	6.19657e-57	L5 PT ALM Slco2a1	P12
Diaph3	2.29019e-61	0.280578	0.328	0.168	8.26508e-57	L5 PT ALM Slco2a1	P12
Grip1	4.38962e-60	0.268404	0.956	0.874	1.58417e-55	L5 PT ALM Slco2a1	P12
Nkain3	2.00864e-59	0.342908	0.733	0.555	7.24898e-55	L5 PT ALM Slco2a1	P12
Stxbp5l	3.1957e-59	0.30803	0.89	0.781	1.1533e-54	L5 PT ALM Slco2a1	P12
Hs3st5	2.76859e-58	0.303921	0.741	0.566	9.99158e-54	L5 PT ALM Slco2a1	P12
Adamts18	2.68508e-57	0.259276	0.371	0.211	9.6902e-53	L5 PT ALM Slco2a1	P12
Bmpr1b	6.00924e-57	0.334426	0.256	0.117	2.16868e-52	L5 PT ALM Slco2a1	P12
Lsamp	3.17685e-54	0.902545	0.924	0.854	1.14649e-49	L5 PT ALM Slco2a1	P12
Vsnl1	3.87809e-52	0.264457	0.847	0.711	1.39956e-47	L5 PT ALM Slco2a1	P12
L3mbtl4	4.31292e-49	0.403396	0.6	0.436	1.55649e-44	L5 PT ALM Slco2a1	P12
Crim1	5.27513e-48	0.28955	0.579	0.413	1.90374e-43	L5 PT ALM Slco2a1	P12
Cntnap5b	4.10441e-47	0.31984	0.728	0.57	1.48124e-42	L5 PT ALM Slco2a1	P12
Airn	1.39488e-43	0.297972	0.451	0.298	5.03397e-39	L5 PT ALM Slco2a1	P12
Trmt13	6.9186e-42	0.377432	0.316	0.183	2.49685e-37	L5 PT ALM Slco2a1	P12
Egfem1	1.98844e-288	1.67244	0.526	0.204	7.17608e-284	L5 PT ALM Hpgd	P12
Stxbp6	2.84216e-243	1.14924	0.539	0.25	1.02571e-238	L5 PT ALM Hpgd	P12
Rbfox1	8.3977e-224	0.466028	1	0.999	3.03065e-219	L5 PT ALM Hpgd	P12
Fstl4	7.87383e-203	0.921641	0.561	0.317	2.84159e-198	L5 PT ALM Hpgd	P12
Lrrtm4	6.53874e-195	0.568997	0.996	0.977	2.35977e-190	L5 PT ALM Hpgd	P12
Robo1	4.70149e-191	0.558576	0.985	0.987	1.69672e-186	L5 PT ALM Hpgd	P12
Gpc5	5.30704e-179	0.958778	0.74	0.757	1.91526e-174	L5 PT ALM Hpgd	P12
Galnt17	7.50662e-165	0.850109	0.512	0.228	2.70907e-160	L5 PT ALM Hpgd	P12
Pdzrn3	3.25116e-155	0.704847	0.819	0.704	1.17331e-150	L5 PT ALM Hpgd	P12
Kctd8	5.25238e-153	0.799567	0.499	0.241	1.89553e-148	L5 PT ALM Hpgd	P12
Gm2164	1.20037e-144	0.770988	0.646	0.408	4.33201e-140	L5 PT ALM Hpgd	P12
Dlg2	8.76058e-140	0.499289	0.852	0.615	3.16161e-135	L5 PT ALM Hpgd	P12
Sorbs2	1.03775e-136	0.505313	0.819	0.802	3.74512e-132	L5 PT ALM Hpgd	P12
Ptprk	7.52794e-134	0.809854	0.657	0.551	2.71676e-129	L5 PT ALM Hpgd	P12
Adcy8	1.262e-130	0.549396	0.757	0.669	4.55442e-126	L5 PT ALM Hpgd	P12
Auts2	2.2407e-130	0.333748	0.994	0.993	8.08645e-126	L5 PT ALM Hpgd	P12
Gria4	1.02993e-129	0.539123	0.788	0.736	3.71691e-125	L5 PT ALM Hpgd	P12
Kirrel3	5.53014e-129	0.617119	0.981	0.97	1.99577e-124	L5 PT ALM Hpgd	P12
Wwc1	2.84452e-123	0.468133	0.838	0.82	1.02656e-118	L5 PT ALM Hpgd	P12
Mast4	2.47307e-122	0.466771	0.84	0.808	8.92507e-118	L5 PT ALM Hpgd	P12
Fam189a1	9.72274e-114	0.465696	0.857	0.768	3.50884e-109	L5 PT ALM Hpgd	P12
Nos1ap	1.78411e-112	0.368458	0.978	0.948	6.43868e-108	L5 PT ALM Hpgd	P12
Arl15	5.01278e-112	0.422521	0.881	0.871	1.80906e-107	L5 PT ALM Hpgd	P12
Sorcs2	2.07325e-111	0.497643	0.793	0.751	7.48216e-107	L5 PT ALM Hpgd	P12
Magi3	8.69446e-108	0.369591	0.75	0.751	3.13774e-103	L5 PT ALM Hpgd	P12
Slc4a3	2.20846e-96	0.438582	0.71	0.688	7.97012e-92	L5 PT ALM Hpgd	P12
Gm42418	3.9465e-96	0.794884	0.989	0.987	1.42425e-91	L5 PT ALM Hpgd	P12
Frmd5	3.10013e-93	0.387997	0.954	0.968	1.11881e-88	L5 PT ALM Hpgd	P12
Epha4	1.49873e-92	0.33559	0.724	0.736	5.40878e-88	L5 PT ALM Hpgd	P12
Negr1	3.34195e-90	0.328618	0.985	0.981	1.20608e-85	L5 PT ALM Hpgd	P12
A230057D06Rik	3.71203e-90	0.494724	0.716	0.502	1.33964e-85	L5 PT ALM Hpgd	P12
Grm1	1.72354e-89	0.445564	0.541	0.492	6.22009e-85	L5 PT ALM Hpgd	P12
Zranb2	1.95151e-89	0.420913	0.92	0.9	7.04281e-85	L5 PT ALM Hpgd	P12
Camk2a	6.71189e-87	0.37445	0.952	0.946	2.42225e-82	L5 PT ALM Hpgd	P12
Unc80	9.76924e-87	0.352808	0.917	0.916	3.52562e-82	L5 PT ALM Hpgd	P12
Kif26b	2.36752e-86	0.406724	0.539	0.477	8.54414e-82	L5 PT ALM Hpgd	P12
Ccbe1	6.10211e-86	0.455783	0.258	0.142	2.20219e-81	L5 PT ALM Hpgd	P12
Cit	1.06528e-85	0.366417	0.802	0.776	3.84448e-81	L5 PT ALM Hpgd	P12
Ryr2	2.85775e-82	0.339762	0.948	0.957	1.03133e-77	L5 PT ALM Hpgd	P12
Sema6a	5.0829e-82	0.467233	0.473	0.348	1.83437e-77	L5 PT ALM Hpgd	P12
Erg	5.87579e-80	0.484992	0.142	0.045	2.12051e-75	L5 PT ALM Hpgd	P12
Dscam	2.43133e-79	0.319616	0.958	0.959	8.77443e-75	L5 PT ALM Hpgd	P12
Trpc7	7.25434e-79	0.441258	0.23	0.102	2.61802e-74	L5 PT ALM Hpgd	P12
Clvs1	6.25565e-78	0.356654	0.635	0.592	2.2576e-73	L5 PT ALM Hpgd	P12
Lingo2	5.3965e-77	0.296379	0.993	0.994	1.94754e-72	L5 PT ALM Hpgd	P12
Rab3c	2.27599e-75	0.316021	0.817	0.821	8.21383e-71	L5 PT ALM Hpgd	P12
Pcgf5	1.79807e-74	0.300462	0.476	0.475	6.48907e-70	L5 PT ALM Hpgd	P12
Farp1	4.13814e-74	0.306867	0.924	0.931	1.49341e-69	L5 PT ALM Hpgd	P12
Sox5	1.06156e-73	0.274251	0.989	0.986	3.83108e-69	L5 PT ALM Hpgd	P12
Phactr3	2.90544e-73	0.283397	0.823	0.846	1.04854e-68	L5 PT ALM Hpgd	P12
Trpc4	2.1476e-72	0.318699	0.86	0.846	7.75046e-68	L5 PT ALM Hpgd	P12
Slc1a1	3.21504e-72	0.271554	0.552	0.561	1.16027e-67	L5 PT ALM Hpgd	P12
Tmem150c	1.13762e-71	0.34674	0.468	0.417	4.10555e-67	L5 PT ALM Hpgd	P12
Npnt	1.67294e-70	0.447801	0.367	0.199	6.03748e-66	L5 PT ALM Hpgd	P12
Sorbs1	3.72471e-70	0.27605	0.849	0.868	1.34421e-65	L5 PT ALM Hpgd	P12
Tmeff2	6.11348e-70	0.285424	0.834	0.827	2.20629e-65	L5 PT ALM Hpgd	P12
Dock4	1.39099e-69	0.271248	0.728	0.761	5.01994e-65	L5 PT ALM Hpgd	P12
Cacng3	1.81201e-69	0.322688	0.626	0.608	6.53937e-65	L5 PT ALM Hpgd	P12
Tenm3	5.37938e-68	0.395766	0.643	0.737	1.94136e-63	L5 PT ALM Hpgd	P12
Satb2	1.61264e-67	0.409119	0.713	0.696	5.81986e-63	L5 PT ALM Hpgd	P12
Adgrl2	3.10424e-67	0.322354	0.706	0.697	1.12029e-62	L5 PT ALM Hpgd	P12
Shank2	6.04726e-67	0.317668	0.887	0.885	2.18239e-62	L5 PT ALM Hpgd	P12
Prrc2c	9.63977e-67	0.250468	0.654	0.686	3.4789e-62	L5 PT ALM Hpgd	P12
Cacna1c	2.26824e-65	0.264615	0.913	0.922	8.18587e-61	L5 PT ALM Hpgd	P12
Slc8a1	2.29849e-65	0.254817	0.969	0.981	8.29503e-61	L5 PT ALM Hpgd	P12
Raver2	2.74238e-65	0.28128	0.602	0.587	9.89698e-61	L5 PT ALM Hpgd	P12
Srrm2	1.13864e-63	0.350456	0.991	0.99	4.10923e-59	L5 PT ALM Hpgd	P12
Tmem108	2.1598e-63	0.295025	0.958	0.963	7.7945e-59	L5 PT ALM Hpgd	P12
Prex1	2.87145e-63	0.366302	0.266	0.173	1.03628e-58	L5 PT ALM Hpgd	P12
Tcf25	3.89899e-63	0.405087	0.632	0.444	1.4071e-58	L5 PT ALM Hpgd	P12
Ralgapa2	7.11251e-63	0.25815	0.915	0.929	2.56684e-58	L5 PT ALM Hpgd	P12
Slc2a13	1.34734e-62	0.272269	0.741	0.769	4.8624e-58	L5 PT ALM Hpgd	P12
Pnisr	1.99702e-62	0.281521	0.793	0.814	7.20706e-58	L5 PT ALM Hpgd	P12
Rgs6	1.14678e-61	0.405138	0.839	0.831	4.13861e-57	L5 PT ALM Hpgd	P12
Slc24a3	3.03184e-61	0.447097	0.427	0.357	1.09416e-56	L5 PT ALM Hpgd	P12
Pcnx2	3.47824e-61	0.263119	0.808	0.817	1.25526e-56	L5 PT ALM Hpgd	P12
2001-03-01	6.67537e-61	0.266117	0.783	0.826	2.40907e-56	L5 PT ALM Hpgd	P12
Pitpnm3	2.61094e-60	0.299784	0.397	0.361	9.42261e-56	L5 PT ALM Hpgd	P12
Gm26917	6.72478e-60	0.449547	0.619	0.596	2.4269e-55	L5 PT ALM Hpgd	P12
Specc1	1.18988e-59	0.300956	0.557	0.573	4.29415e-55	L5 PT ALM Hpgd	P12
Lamp5	2.72084e-59	0.31869	0.306	0.233	9.81922e-55	L5 PT ALM Hpgd	P12
Frmd6	9.03376e-59	0.308854	0.394	0.356	3.26019e-54	L5 PT ALM Hpgd	P12
Etv1	2.55776e-58	0.288575	0.382	0.356	9.23071e-54	L5 PT ALM Hpgd	P12
Kctd16	4.50906e-58	0.341853	0.75	0.753	1.62728e-53	L5 PT ALM Hpgd	P12
Epha3	7.00942e-57	0.274676	0.459	0.456	2.52963e-52	L5 PT ALM Hpgd	P12
Luc7l3	1.18459e-56	0.333066	0.856	0.861	4.27505e-52	L5 PT ALM Hpgd	P12
Shisa9	3.37597e-56	0.307011	0.76	0.813	1.21836e-51	L5 PT ALM Hpgd	P12
AY036118	7.74983e-56	0.440639	0.556	0.387	2.79684e-51	L5 PT ALM Hpgd	P12
Pnn	1.00175e-55	0.255187	0.715	0.738	3.61522e-51	L5 PT ALM Hpgd	P12
Slf2	3.00054e-55	0.427407	0.425	0.273	1.08286e-50	L5 PT ALM Hpgd	P12
Pbx3	4.911e-55	0.368788	0.51	0.448	1.77233e-50	L5 PT ALM Hpgd	P12
Lhfp	7.41627e-55	0.396826	0.437	0.357	2.67646e-50	L5 PT ALM Hpgd	P12
Klf12	8.26277e-55	0.306	0.645	0.611	2.98195e-50	L5 PT ALM Hpgd	P12
Shc3	9.52323e-55	0.261394	0.573	0.567	3.43684e-50	L5 PT ALM Hpgd	P12
Gm36251	1.21953e-54	0.392718	0.224	0.103	4.40115e-50	L5 PT ALM Hpgd	P12
Gm16083	6.54517e-54	0.26705	0.421	0.409	2.36209e-49	L5 PT ALM Hpgd	P12
Sulf2	1.32297e-52	0.251698	0.481	0.485	4.77447e-48	L5 PT ALM Hpgd	P12
Ildr2	1.39918e-52	0.272607	0.616	0.574	5.04951e-48	L5 PT ALM Hpgd	P12
Nsd3	9.75556e-52	0.373111	0.574	0.405	3.52069e-47	L5 PT ALM Hpgd	P12
Syne1	1.3566e-51	0.308	0.855	0.841	4.89583e-47	L5 PT ALM Hpgd	P12
5730522E02Rik	7.68617e-51	0.344157	0.868	0.888	2.77386e-46	L5 PT ALM Hpgd	P12
Cdh20	8.10375e-50	0.353842	0.639	0.605	2.92456e-45	L5 PT ALM Hpgd	P12
Hnrnpa2b1	8.27104e-50	0.252931	0.644	0.652	2.98494e-45	L5 PT ALM Hpgd	P12
Taco1	1.66847e-47	0.361512	0.298	0.256	6.02133e-43	L5 PT ALM Hpgd	P12
Kcnk9	1.82412e-47	0.344687	0.273	0.16	6.58308e-43	L5 PT ALM Hpgd	P12
Rbfox3	7.51685e-47	0.275108	0.946	0.963	2.71276e-42	L5 PT ALM Hpgd	P12
Cdh18	8.81103e-47	0.260309	0.573	0.589	3.17981e-42	L5 PT ALM Hpgd	P12
Rab31	1.20898e-45	0.328657	0.279	0.195	4.36307e-41	L5 PT ALM Hpgd	P12
Gm11639	1.28666e-45	0.326672	0.215	0.13	4.64342e-41	L5 PT ALM Hpgd	P12
Tbc1d1	2.63839e-45	0.288368	0.22	0.153	9.52168e-41	L5 PT ALM Hpgd	P12
Gm30382	6.5305e-45	0.33682	0.798	0.782	2.35679e-40	L5 PT ALM Hpgd	P12
Cdh12	8.99326e-45	0.305718	0.604	0.577	3.24558e-40	L5 PT ALM Hpgd	P12
C78859	1.59548e-44	0.348979	0.384	0.243	5.75792e-40	L5 PT ALM Hpgd	P12
Qrfpr	1.4874e-43	0.325404	0.373	0.329	5.36786e-39	L5 PT ALM Hpgd	P12
Serpine2	1.55212e-42	0.250594	0.387	0.358	5.60143e-38	L5 PT ALM Hpgd	P12
Adamts2	7.12376e-42	0.262347	0.424	0.404	2.57089e-37	L5 PT ALM Hpgd	P12
Galntl6	8.52836e-42	0.293786	0.967	0.972	3.0778e-37	L5 PT ALM Hpgd	P12
Atp2b2	1.01514e-41	0.255317	0.961	0.972	3.66352e-37	L5 PT ALM Hpgd	P12
Atp2b4	4.33178e-41	0.284016	0.311	0.274	1.5633e-36	L5 PT ALM Hpgd	P12
Pdzrn4	1.78431e-40	0.326134	0.686	0.667	6.43938e-36	L5 PT ALM Hpgd	P12
Cacna1h	6.49321e-40	0.270164	0.343	0.304	2.34334e-35	L5 PT ALM Hpgd	P12
Hectd4	4.55824e-39	0.311532	0.555	0.406	1.64502e-34	L5 PT ALM Hpgd	P12
Col8a1	3.93138e-38	0.291059	0.112	0.037	1.41879e-33	L5 PT ALM Hpgd	P12
Tshz3	2.69525e-37	0.257886	0.522	0.482	9.72688e-33	L5 PT ALM Hpgd	P12
Bicdl1	9.62474e-37	0.335088	0.39	0.265	3.47347e-32	L5 PT ALM Hpgd	P12
Gm45846	2.15161e-36	0.258588	0.176	0.085	7.76494e-32	L5 PT ALM Hpgd	P12
Gucy1b1	5.89242e-36	0.319584	0.362	0.234	2.12652e-31	L5 PT ALM Hpgd	P12
Gm47283	7.5889e-36	0.370044	0.442	0.314	2.73876e-31	L5 PT ALM Hpgd	P12
Rasgrf2	2.28658e-33	0.26168	0.311	0.271	8.25206e-29	L5 PT ALM Hpgd	P12
Gucy1a1	1.0228e-31	0.258602	0.204	0.11	3.69117e-27	L5 PT ALM Hpgd	P12
Tspoap1	2.88246e-31	0.319035	0.313	0.205	1.04025e-26	L5 PT ALM Hpgd	P12
AC149090.1	3.5482e-29	0.333196	0.311	0.21	1.28051e-24	L5 PT ALM Hpgd	P12
Pabpn1	7.82026e-28	0.299701	0.336	0.246	2.82225e-23	L5 PT ALM Hpgd	P12
B230307C23Rik	2.11804e-27	0.251174	0.344	0.287	7.64378e-23	L5 PT ALM Hpgd	P12
Eipr1	3.02327e-27	0.265067	0.27	0.178	1.09107e-22	L5 PT ALM Hpgd	P12
Rtl4	3.97951e-27	0.314191	0.411	0.294	1.43617e-22	L5 PT ALM Hpgd	P12
Cdh4	9.86194e-27	0.328471	0.413	0.413	3.55908e-22	L5 PT ALM Hpgd	P12
Col26a1	2.96622e-26	0.27447	0.108	0.072	1.07048e-21	L5 PT ALM Hpgd	P12
Mia2	7.7762e-24	0.259054	0.324	0.226	2.80635e-19	L5 PT ALM Hpgd	P12
Ripor2	7.13574e-20	0.253071	0.292	0.212	2.57522e-15	L5 PT ALM Hpgd	P12
Xist	2.5345e-15	0.275213	0.553	0.506	9.14677e-11	L5 PT ALM Hpgd	P12
Dcc	0	3.74339	0.923	0.288	0	L5 PT ALM Npsr1	P12
Tmtc2	0	2.22913	0.973	0.632	0	L5 PT ALM Npsr1	P12
Vwc2l	0	2.20804	0.798	0.128	0	L5 PT ALM Npsr1	P12
Grin3a	0	2.16901	0.906	0.292	0	L5 PT ALM Npsr1	P12
Sorcs1	0	2.12446	0.999	0.918	0	L5 PT ALM Npsr1	P12
Rora	0	1.95609	0.993	0.886	0	L5 PT ALM Npsr1	P12
Nrg1	0	1.56431	1	0.97	0	L5 PT ALM Npsr1	P12
Ehbp1	0	1.36167	0.973	0.841	0	L5 PT ALM Npsr1	P12
Fn1	7.6291997587372e-314	1.6773	0.555	0.026	0	L5 PT ALM Npsr1	P12
Kcnb2	8.79659e-289	1.28847	0.993	0.938	3.1746e-284	L5 PT ALM Npsr1	P12
Reln	4.06843e-285	1.69767	0.841	0.547	1.46825e-280	L5 PT ALM Npsr1	P12
Pcdh9	5.8022e-263	1.32532	1	0.989	2.09396e-258	L5 PT ALM Npsr1	P12
Il1rapl2	8.82872e-255	2.04791	0.607	0.135	3.1862e-250	L5 PT ALM Npsr1	P12
Ncald	2.03287e-250	1.65513	0.734	0.256	7.33644e-246	L5 PT ALM Npsr1	P12
Ust	1.34495e-238	1.33277	0.873	0.551	4.85379e-234	L5 PT ALM Npsr1	P12
Csmd1	7.4464e-218	0.698433	1	1	2.68733e-213	L5 PT ALM Npsr1	P12
Lrrc4c	1.9165e-214	1.26646	0.996	0.954	6.91647e-210	L5 PT ALM Npsr1	P12
Samd5	4.36089e-205	1.31337	0.657	0.163	1.5738e-200	L5 PT ALM Npsr1	P12
Sorcs3	4.74271e-202	1.46002	0.737	0.238	1.7116e-197	L5 PT ALM Npsr1	P12
Ttc28	1.72886e-191	1.26943	0.804	0.34	6.23928e-187	L5 PT ALM Npsr1	P12
Cers6	1.31723e-182	1.10139	0.894	0.634	4.75374e-178	L5 PT ALM Npsr1	P12
Piezo2	1.42612e-181	1.374	0.326	0.016	5.14671e-177	L5 PT ALM Npsr1	P12
Plcb4	7.3395e-172	1.09222	0.887	0.566	2.64875e-167	L5 PT ALM Npsr1	P12
Plxna2	8.35382e-163	0.983915	0.933	0.8	3.01481e-158	L5 PT ALM Npsr1	P12
Ltbp1	3.66041e-161	1.24785	0.609	0.153	1.321e-156	L5 PT ALM Npsr1	P12
Spock3	4.84277e-160	1.35594	0.531	0.167	1.74771e-155	L5 PT ALM Npsr1	P12
Htr2a	1.47913e-152	1.15226	0.619	0.224	5.33803e-148	L5 PT ALM Npsr1	P12
Lgr4	1.67157e-149	1.04946	0.608	0.251	6.03252e-145	L5 PT ALM Npsr1	P12
Nrxn3	2.18387e-148	0.666459	1	1	7.88136e-144	L5 PT ALM Npsr1	P12
Adamtsl1	4.69928e-140	1.43251	0.441	0.152	1.69592e-135	L5 PT ALM Npsr1	P12
Gm49171	1.86152e-138	1.08804	0.355	0.043	6.71802e-134	L5 PT ALM Npsr1	P12
Car10	1.74544e-134	1.30504	0.591	0.256	6.29911e-130	L5 PT ALM Npsr1	P12
Pak7	2.3521e-125	0.909967	0.9	0.726	8.48848e-121	L5 PT ALM Npsr1	P12
Fam19a1	1.18877e-123	0.522757	1	0.999	4.29014e-119	L5 PT ALM Npsr1	P12
Cntn3	2.43487e-123	0.795311	0.974	0.9	8.78722e-119	L5 PT ALM Npsr1	P12
Asic2	6.23612e-119	0.633303	1	0.998	2.25055e-114	L5 PT ALM Npsr1	P12
Nwd2	1.25501e-118	0.962671	0.807	0.612	4.52919e-114	L5 PT ALM Npsr1	P12
Kcnk2	2.26864e-117	0.930202	0.514	0.138	8.18729e-113	L5 PT ALM Npsr1	P12
Wdpcp	5.82765e-116	0.932533	0.682	0.41	2.10314e-111	L5 PT ALM Npsr1	P12
Frmpd4	9.86619e-112	0.710003	0.99	0.918	3.56061e-107	L5 PT ALM Npsr1	P12
Lsamp	6.17937e-111	0.91611	0.996	0.874	2.23007e-106	L5 PT ALM Npsr1	P12
Ankrd33b	8.37792e-111	0.696431	0.385	0.067	3.02351e-106	L5 PT ALM Npsr1	P12
Sash1	3.42594e-105	0.734161	0.401	0.086	1.23639e-100	L5 PT ALM Npsr1	P12
Syndig1	4.2063e-101	0.76777	0.91	0.764	1.51801e-96	L5 PT ALM Npsr1	P12
Satb2	1.1262e-100	0.842353	0.907	0.684	4.06435e-96	L5 PT ALM Npsr1	P12
Npnt	2.35039e-96	0.868935	0.618	0.246	8.48231e-92	L5 PT ALM Npsr1	P12
Egflam	4.15962e-96	0.67592	0.235	0.024	1.50117e-91	L5 PT ALM Npsr1	P12
Pou6f2	8.47188e-96	0.772448	0.339	0.066	3.05742e-91	L5 PT ALM Npsr1	P12
Aff2	1.00082e-95	0.903159	0.754	0.533	3.61184e-91	L5 PT ALM Npsr1	P12
Olfm3	4.09396e-95	0.917616	0.468	0.175	1.47747e-90	L5 PT ALM Npsr1	P12
Otx1	4.094e-94	0.515601	0.282	0.038	1.47748e-89	L5 PT ALM Npsr1	P12
Postn	2.88546e-93	1.32995	0.418	0.167	1.04133e-88	L5 PT ALM Npsr1	P12
Chrnb3	1.36582e-92	0.450621	0.197	0.011	4.9291e-88	L5 PT ALM Npsr1	P12
Nrip1	3.69404e-92	0.833059	0.617	0.327	1.33314e-87	L5 PT ALM Npsr1	P12
Utrn	3.90391e-92	0.919447	0.817	0.638	1.40888e-87	L5 PT ALM Npsr1	P12
Cdh8	2.55237e-91	0.790468	0.97	0.868	9.21124e-87	L5 PT ALM Npsr1	P12
Gm20754	1.27633e-89	0.701965	0.98	0.913	4.60614e-85	L5 PT ALM Npsr1	P12
Brinp3	2.58499e-89	0.985053	0.871	0.674	9.32897e-85	L5 PT ALM Npsr1	P12
Gm13936	2.72398e-89	0.644605	0.27	0.045	9.83059e-85	L5 PT ALM Npsr1	P12
Epha6	4.79058e-88	0.698154	0.979	0.878	1.72887e-83	L5 PT ALM Npsr1	P12
Cpne4	5.44698e-85	0.947101	0.442	0.149	1.96576e-80	L5 PT ALM Npsr1	P12
Brinp2	9.67833e-85	0.785973	0.675	0.389	3.49281e-80	L5 PT ALM Npsr1	P12
Gm48749	1.19362e-82	0.455218	0.22	0.021	4.30765e-78	L5 PT ALM Npsr1	P12
Tmeff2	2.39566e-82	0.857199	0.911	0.822	8.64569e-78	L5 PT ALM Npsr1	P12
Cnih3	4.31479e-81	0.790526	0.692	0.441	1.55716e-76	L5 PT ALM Npsr1	P12
Apba2	9.42686e-81	0.671123	0.924	0.826	3.40206e-76	L5 PT ALM Npsr1	P12
Tcf12	2.4112e-80	0.770138	0.753	0.592	8.70179e-76	L5 PT ALM Npsr1	P12
Adcy8	1.44351e-78	0.710859	0.906	0.692	5.20947e-74	L5 PT ALM Npsr1	P12
Grik2	2.19079e-78	0.577882	0.994	0.99	7.90635e-74	L5 PT ALM Npsr1	P12
Macrod2	3.88432e-78	0.500798	1	0.993	1.40181e-73	L5 PT ALM Npsr1	P12
Car4	8.87454e-77	0.35426	0.172	0.011	3.20273e-72	L5 PT ALM Npsr1	P12
Lrp2	1.77151e-76	0.352949	0.156	0.007	6.39322e-72	L5 PT ALM Npsr1	P12
Rarb	1.76433e-75	0.846508	0.524	0.255	6.36728e-71	L5 PT ALM Npsr1	P12
Grm5	1.14941e-74	0.514625	0.997	0.989	4.14809e-70	L5 PT ALM Npsr1	P12
Dnm3	1.98618e-74	0.713456	0.813	0.589	7.16793e-70	L5 PT ALM Npsr1	P12
Kcnh5	2.71666e-74	0.676422	0.398	0.119	9.80416e-70	L5 PT ALM Npsr1	P12
Zmat4	4.16186e-73	0.761521	0.671	0.405	1.50197e-68	L5 PT ALM Npsr1	P12
Satb1	5.47317e-73	0.724493	0.691	0.417	1.97521e-68	L5 PT ALM Npsr1	P12
Ildr2	3.25598e-72	0.678106	0.81	0.573	1.17505e-67	L5 PT ALM Npsr1	P12
Cdh4	5.37434e-71	0.97815	0.642	0.391	1.93955e-66	L5 PT ALM Npsr1	P12
Rbms3	1.87656e-70	0.728428	0.499	0.22	6.77234e-66	L5 PT ALM Npsr1	P12
Zfp462	1.95696e-70	0.700679	0.775	0.583	7.06248e-66	L5 PT ALM Npsr1	P12
Lypd1	3.85298e-70	0.79725	0.425	0.167	1.3905e-65	L5 PT ALM Npsr1	P12
Ptprn2	1.34249e-69	0.436139	0.997	0.987	4.84491e-65	L5 PT ALM Npsr1	P12
Pdzd2	2.33236e-67	0.598238	0.946	0.898	8.41725e-63	L5 PT ALM Npsr1	P12
Dgkb	2.32138e-66	0.701085	0.907	0.764	8.37763e-62	L5 PT ALM Npsr1	P12
Nol4	3.94069e-66	0.611455	0.904	0.774	1.42216e-61	L5 PT ALM Npsr1	P12
Cxxc4	7.73707e-66	0.638837	0.602	0.36	2.79223e-61	L5 PT ALM Npsr1	P12
Prrg1	1.1414e-65	0.64129	0.388	0.13	4.11919e-61	L5 PT ALM Npsr1	P12
Ccdc136	1.87214e-64	0.65304	0.611	0.339	6.75638e-60	L5 PT ALM Npsr1	P12
Gm32647	7.34013e-63	0.647073	0.23	0.039	2.64898e-58	L5 PT ALM Npsr1	P12
Fat3	2.94997e-62	0.520793	0.989	0.952	1.06462e-57	L5 PT ALM Npsr1	P12
Robo3	3.09329e-61	0.693258	0.541	0.259	1.11634e-56	L5 PT ALM Npsr1	P12
Klhl32	1.73787e-60	0.614854	0.81	0.61	6.2718e-56	L5 PT ALM Npsr1	P12
Il1rapl1	3.78089e-60	0.417698	0.999	0.993	1.36448e-55	L5 PT ALM Npsr1	P12
Lrrn3	5.56148e-60	0.674998	0.393	0.176	2.00708e-55	L5 PT ALM Npsr1	P12
4930587E11Rik	9.46459e-60	0.70702	0.452	0.178	3.41568e-55	L5 PT ALM Npsr1	P12
Arap2	1.24223e-59	0.567493	0.884	0.759	4.48309e-55	L5 PT ALM Npsr1	P12
Unc13c	1.73773e-59	0.552519	0.237	0.05	6.27131e-55	L5 PT ALM Npsr1	P12
Sbf2	8.42948e-59	0.573717	0.89	0.722	3.04212e-54	L5 PT ALM Npsr1	P12
Mctp1	7.6969e-58	0.661368	0.847	0.697	2.77774e-53	L5 PT ALM Npsr1	P12
AC156026.1	1.41207e-57	0.330145	0.163	0.017	5.09604e-53	L5 PT ALM Npsr1	P12
Npas3	1.45555e-57	0.730306	0.385	0.187	5.25295e-53	L5 PT ALM Npsr1	P12
Anks1b	7.60831e-57	0.288709	1	0.999	2.74576e-52	L5 PT ALM Npsr1	P12
Cacna1c	1.36431e-56	0.507068	0.98	0.911	4.92366e-52	L5 PT ALM Npsr1	P12
Gm45352	4.59062e-56	0.482835	0.275	0.073	1.65671e-51	L5 PT ALM Npsr1	P12
Myo1b	4.49872e-55	0.603635	0.409	0.16	1.62354e-50	L5 PT ALM Npsr1	P12
Rcan2	4.52648e-55	0.564469	0.536	0.251	1.63356e-50	L5 PT ALM Npsr1	P12
Pcsk6	5.54987e-55	0.551811	0.322	0.095	2.00289e-50	L5 PT ALM Npsr1	P12
Cblb	1.44598e-54	0.624682	0.541	0.316	5.21839e-50	L5 PT ALM Npsr1	P12
Gm45881	2.89611e-54	0.594554	0.345	0.109	1.04518e-49	L5 PT ALM Npsr1	P12
Galnt13	5.24659e-54	0.502663	0.946	0.876	1.89344e-49	L5 PT ALM Npsr1	P12
Auts2	7.71347e-54	0.365222	1	0.993	2.78371e-49	L5 PT ALM Npsr1	P12
Nr3c2	1.77559e-53	0.601136	0.858	0.718	6.40794e-49	L5 PT ALM Npsr1	P12
Galnt17	1.00338e-52	0.75052	0.627	0.338	3.62109e-48	L5 PT ALM Npsr1	P12
Hs6st2	3.12691e-52	0.589129	0.83	0.663	1.12847e-47	L5 PT ALM Npsr1	P12
Col12a1	4.69572e-52	0.398314	0.173	0.025	1.69464e-47	L5 PT ALM Npsr1	P12
[truncated: 1,432 more rows]
