# Supplementary material for: Developmental molecular controls over arealization of descending cortical motor pathways
Source: Research Square preprint supplement (doi:10.21203/rs.3.rs-3166328/v1), 2023-07-24
Supplement: Supplementary file 4 [file 99da193e70ec459622472aef.xlsx]

## Sheet: Abbreviations_Area-ETtargets_na
Name	safe_name	Parent	Parent_full	category
MOp	Primary motor area	MO	Somatomotor areas	Cortical area
SSp-ll	Primary somatosensory area lower limb	SSp	Primary somatosensory area	Cortical area
SSp-ul	Primary somatosensory area upper limb	SSp	Primary somatosensory area	Cortical area
AUDd	Dorsal auditory area	AUD	Auditory areas	Cortical area
MOs	Secondary motor area	MO	Somatomotor areas	Cortical area
SSp-m	Primary somatosensory area mouth	SSp	Primary somatosensory area	Cortical area
ACAd	Anterior cingulate area dorsal part	ACA	Anterior cingulate area	Cortical area
PL	Prelimbic area	Isocortex	Isocortex	Cortical area
GU	Gustatory areas	Isocortex	Isocortex	Cortical area
SSp-tr	Primary somatosensory area trunk	SSp	Primary somatosensory area	Cortical area
AUDv	Ventral auditory area	AUD	Auditory areas	Cortical area
SSp-n	Primary somatosensory area nose	SSp	Primary somatosensory area	Cortical area
SSs	Supplemental somatosensory area	SS	Somatosensory areas	Cortical area
RSPagl	Retrosplenial area lateral agranular part	RSP	Retrosplenial area	Cortical area
VISC	Visceral area	Isocortex	Isocortex	Cortical area
VISam	Anteromedial visual area	VIS	Visual areas	Cortical area
SSp-bfd	Primary somatosensory area barrel field	SSp	Primary somatosensory area	Cortical area
ORBm	Orbital area medial part	ORB	Orbital area	Cortical area
ILA	Infralimbic area	Isocortex	Isocortex	Cortical area
AId	Agranular insular area dorsal part	AI	Agranular insular area	Cortical area
PTLp	Posterior parietal association areas	Isocortex	Isocortex	Cortical area
ACAv	Anterior cingulate area ventral part	ACA	Anterior cingulate area	Cortical area
AUDp	Primary auditory area	AUD	Auditory areas	Cortical area
TEa	Temporal association areas	Isocortex	Isocortex	Cortical area
RSPd	Retrosplenial area dorsal part	RSP	Retrosplenial area	Cortical area
ORBl	Orbital area lateral part	ORB	Orbital area	Cortical area
RSPv	Retrosplenial area ventral part	RSP	Retrosplenial area	Cortical area
AUDpo	Posterior auditory area	AUD	Auditory areas	Cortical area
VISal	Anterolateral visual area	VIS	Visual areas	Cortical area
PERI	Perirhinal area	Isocortex	Isocortex	Cortical area
AIp	Agranular insular area posterior part	AI	Agranular insular area	Cortical area
ECT	Ectorhinal area	Isocortex	Isocortex	Cortical area
ORBvl	Orbital area ventrolateral part	ORB	Orbital area	Cortical area
AIv	Agranular insular area ventral part	AI	Agranular insular area	Cortical area
VISl	Lateral visual area	VIS	Visual areas	Cortical area
VISpm	posteromedial visual area	VIS	Visual areas	Cortical area
VISpl	Posterolateral visual area	VIS	Visual areas	Cortical area
FRP	Frontal pole cerebral cortex	Isocortex	Isocortex	Cortical area
VISp	Primary visual area	VIS	Visual areas	Cortical area
ORB	Orbital area	Isocortex	Isocortex	Cortical area
ACA	Anterior cingulate area	Isocortex	Isocortex	Cortical area
Acs5	Accessory trigeminal nucleus	P-mot	Pons motor related	ET strurcture
ACVII	Accessory facial motor nucleus	MY-mot	Medulla motor related	ET strurcture
AD	Anterodorsal nucleus	ATN	Anterior group of the dorsal thalamus	ET strurcture
AM	Anteromedial nucleus	ATN	Anterior group of the dorsal thalamus	ET strurcture
AMB	Nucleus ambiguus	MY-mot	Medulla motor related	ET strurcture
AT	Anterior tegmental nucleus	MBmot	Midbrain motor related	ET strurcture
AV	Anteroventral nucleus of thalamus	ATN	Anterior group of the dorsal thalamus	ET strurcture
B	Barrington's nucleus	P-mot	Pons motor related	ET strurcture
CL	Central lateral nucleus of the thalamus	ILM	Intralaminar nuclei of the dorsal thalamus	ET strurcture
CM	Central medial nucleus of the thalamus	ILM	Intralaminar nuclei of the dorsal thalamus	ET strurcture
CN	Cochlear nuclei	MY-sen	Medulla sensory related	ET strurcture
CS	Superior central nucleus raphe	P-sat	Pons behavioral state related	ET strurcture
CUN	Cuneiform nucleus	MBmot	Midbrain motor related	ET strurcture
DCN	Dorsal column nuclei	MY-sen	Medulla sensory related	ET strurcture
DMX	Dorsal motor nucleus of the vagus nerve	MY-mot	Medulla motor related	ET strurcture
DT	Dorsal terminal nucleus of the accessory optic tract	MBmot	Midbrain motor related	ET strurcture
DTN	Dorsal tegmental nucleus	P-mot	Pons motor related	ET strurcture
ECU	External cuneate nucleus	MY-sen	Medulla sensory related	ET strurcture
Eth	Ethmoid nucleus of the thalamus	LAT	Lateral group of the dorsal thalamus	ET strurcture
EW	Edinger-Westphal nucleus	MBmot	Midbrain motor related	ET strurcture
GRN	Gigantocellular reticular nucleus	MY-mot	Medulla motor related	ET strurcture
I5	Intertrigeminal nucleus	P-mot	Pons motor related	ET strurcture
IAD	Interanterodorsal nucleus of the thalamus	ATN	Anterior group of the dorsal thalamus	ET strurcture
IAM	Interanteromedial nucleus of the thalamus	ATN	Anterior group of the dorsal thalamus	ET strurcture
IC	Inferior colliculus	MBsen	Midbrain sensory related	ET strurcture
ICB	Infracerebellar nucleus	MY-mot	Medulla motor related	ET strurcture
IGL	Intergeniculate leaflet of the lateral geniculate complex	GENv	Geniculate group ventral thalamus	ET strurcture
III	Oculomotor nucleus	MBmot	Midbrain motor related	ET strurcture
IMD	Intermediodorsal nucleus of the thalamus	MED	Medial group of the dorsal thalamus	ET strurcture
IntG	Intermediate geniculate nucleus	GENv	Geniculate group ventral thalamus	ET strurcture
IO	Inferior olivary complex	MY-mot	Medulla motor related	ET strurcture
IRN	Intermediate reticular nucleus	MY-mot	Medulla motor related	ET strurcture
ISN	Inferior salivatory nucleus	MY-mot	Medulla motor related	ET strurcture
LC	Locus ceruleus	P-sat	Pons behavioral state related	ET strurcture
LD	Lateral dorsal nucleus of thalamus	ATN	Anterior group of the dorsal thalamus	ET strurcture
LDT	Laterodorsal tegmental nucleus	P-sat	Pons behavioral state related	ET strurcture
LGd	Dorsal part of the lateral geniculate complex	GENd	Geniculate group dorsal thalamus	ET strurcture
LGv	Ventral part of the lateral geniculate complex	GENv	Geniculate group ventral thalamus	ET strurcture
LH	Lateral habenula	EPI	Epithalamus	ET strurcture
LP	Lateral posterior nucleus of the thalamus	LAT	Lateral group of the dorsal thalamus	ET strurcture
LRN	Lateral reticular nucleus	MY-mot	Medulla motor related	ET strurcture
LT	Lateral terminal nucleus of the accessory optic tract	MBmot	Midbrain motor related	ET strurcture
MA3	Medial accesory oculomotor nucleus	MBmot	Midbrain motor related	ET strurcture
MARN	Magnocellular reticular nucleus	MY-mot	Medulla motor related	ET strurcture
MD	Mediodorsal nucleus of thalamus	MED	Medial group of the dorsal thalamus	ET strurcture
MEV	Midbrain trigeminal nucleus	MBsen	Midbrain sensory related	ET strurcture
MG	Medial geniculate complex	GENd	Geniculate group dorsal thalamus	ET strurcture
MH	Medial habenula	EPI	Epithalamus	ET strurcture
MRN	Midbrain reticular nucleus	MBmot	Midbrain motor related	ET strurcture
MT	Medial terminal nucleus of the accessory optic tract	MBmot	Midbrain motor related	ET strurcture
NB	Nucleus of the brachium of the inferior colliculus	MBsen	Midbrain sensory related	ET strurcture
NI	Nucleus incertus	P-sat	Pons behavioral state related	ET strurcture
NLL	Nucleus of the lateral lemniscus	P-sen	Pons sensory related	ET strurcture
NTB	Nucleus of the trapezoid body	MY-sen	Medulla sensory related	ET strurcture
NTS	Nucleus of the solitary tract	MY-sen	Medulla sensory related	ET strurcture
P5	Peritrigeminal zone	P-mot	Pons motor related	ET strurcture
Pa4	Paratrochlear nucleus	MBmot	Midbrain motor related	ET strurcture
Pa5	Paratrigeminal nucleus	MY-sen	Medulla sensory related	ET strurcture
PAG	Periaqueductal gray	MBmot	Midbrain motor related	ET strurcture
PARN	Parvicellular reticular nucleus	MY-mot	Medulla motor related	ET strurcture
PAS	Parasolitary nucleus	MY-mot	Medulla motor related	ET strurcture
PB	Parabrachial nucleus	P-sen	Pons sensory related	ET strurcture
PBG	Parabigeminal nucleus	MBsen	Midbrain sensory related	ET strurcture
PC5	Parvicellular motor 5 nucleus	P-mot	Pons motor related	ET strurcture
PCG	Pontine central gray	P-mot	Pons motor related	ET strurcture
PCN	Paracentral nucleus	ILM	Intralaminar nuclei of the dorsal thalamus	ET strurcture
PDTg	Posterodorsal tegmental nucleus	P-mot	Pons motor related	ET strurcture
PF	Parafascicular nucleus	ILM	Intralaminar nuclei of the dorsal thalamus	ET strurcture
PG	Pontine gray	P-mot	Pons motor related	ET strurcture
PGRN	Paragigantocellular reticular nucleus	MY-mot	Medulla motor related	ET strurcture
PHY	Perihypoglossal nuclei	MY-mot	Medulla motor related	ET strurcture
PIL	Posterior intralaminar thalamic nucleus	ILM	Intralaminar nuclei of the dorsal thalamus	ET strurcture
PN	Paranigral nucleus	MBmot	Midbrain motor related	ET strurcture
PO	Posterior complex of the thalamus	LAT	Lateral group of the dorsal thalamus	ET strurcture
POL	Posterior limiting nucleus of the thalamus	LAT	Lateral group of the dorsal thalamus	ET strurcture
PoT	Posterior triangular thalamic nucleus	VENT	Ventral group of the dorsal thalamus	ET strurcture
PPN	Pedunculopontine nucleus	MBsta	Midbrain behavioral state related	ET strurcture
PPY	Parapyramidal nucleus	MY-mot	Medulla motor related	ET strurcture
PR	Perireunensis nucleus	MED	Medial group of the dorsal thalamus	ET strurcture
PRNc	Pontine reticular nucleus caudal part	P-mot	Pons motor related	ET strurcture
PRNr	Pontine reticular nucleus	P-sat	Pons behavioral state related	ET strurcture
PRT	Pretectal region	MBmot	Midbrain motor related	ET strurcture
PSV	Principal sensory nucleus of the trigeminal	P-sen	Pons sensory related	ET strurcture
PT	Parataenial nucleus	MTN	Midline group of the dorsal thalamus	ET strurcture
PVT	Paraventricular nucleus of the thalamus	MTN	Midline group of the dorsal thalamus	ET strurcture
RAmb	Midbrain raphe nuclei	MBsta	Midbrain behavioral state related	ET strurcture
RE	Nucleus of reuniens	MTN	Midline group of the dorsal thalamus	ET strurcture
RH	Rhomboid nucleus	ILM	Intralaminar nuclei of the dorsal thalamus	ET strurcture
RM	Nucleus raphe magnus	MY-sat	Medulla behavioral state related	ET strurcture
RN	Red nucleus	MBmot	Midbrain motor related	ET strurcture
RO	Nucleus raphe obscurus	MY-sat	Medulla behavioral state related	ET strurcture
RPA	Nucleus raphe pallidus	MY-sat	Medulla behavioral state related	ET strurcture
RPO	Nucleus raphe pontis	P-sat	Pons behavioral state related	ET strurcture
RR	Midbrain reticular nucleus retrorubral area	MBmot	Midbrain motor related	ET strurcture
SAG	Nucleus sagulum	MBsen	Midbrain sensory related	ET strurcture
SCm	Superior colliculus motor related	MBmot	Midbrain motor related	ET strurcture
SCO	Subcommissural organ	MBsen	Midbrain sensory related	ET strurcture
SCs	Superior colliculus sensory related	MBsen	Midbrain sensory related	ET strurcture
SG	Supragenual nucleus	P-mot	Pons motor related	ET strurcture
SGN	Suprageniculate nucleus	LAT	Lateral group of the dorsal thalamus	ET strurcture
SLC	Subceruleus nucleus	P-sat	Pons behavioral state related	ET strurcture
SLD	Sublaterodorsal nucleus	P-sat	Pons behavioral state related	ET strurcture
SMT	Submedial nucleus of the thalamus	MED	Medial group of the dorsal thalamus	ET strurcture
SNc	Substantia nigra compact part	MBsta	Midbrain behavioral state related	ET strurcture
SNr	Substantia nigra reticular part	MBmot	Midbrain motor related	ET strurcture
SOC	Superior olivary complex	P-sen	Pons sensory related	ET strurcture
SPFm	Subparafascicular nucleus magnocellular part	SPF	Subparafascicular nucleus	ET strurcture
SPFp	Subparafascicular nucleus parvicellular part	SPF	Subparafascicular nucleus	ET strurcture
SPVI	Spinal nucleus of the trigeminal interpolar part	MY-sen	Medulla sensory related	ET strurcture
SPVO	Spinal nucleus of the trigeminal oral part	MY-sen	Medulla sensory related	ET strurcture
SubG	Subgeniculate nucleus	GENv	Geniculate group ventral thalamus	ET strurcture
SUT	Supratrigeminal nucleus	P-mot	Pons motor related	ET strurcture
TRN	Tegmental reticular nucleus	P-mot	Pons motor related	ET strurcture
V	Motor nucleus of trigeminal	P-mot	Pons motor related	ET strurcture
VAL	Ventral anterior-lateral complex of the thalamus	VENT	Ventral group of the dorsal thalamus	ET strurcture
VI	Abducens nucleus	MY-mot	Medulla motor related	ET strurcture
VII	Facial motor nucleus	MY-mot	Medulla motor related	ET strurcture
VM	Ventral medial nucleus of the thalamus	VENT	Ventral group of the dorsal thalamus	ET strurcture
VNC	Vestibular nuclei	MY-mot	Medulla motor related	ET strurcture
VP	Ventral posterior complex of the thalamus	VENT	Ventral group of the dorsal thalamus	ET strurcture
VTA	Ventral tegmental area	MBmot	Midbrain motor related	ET strurcture
VTN	Ventral tegmental nucleus	MBmot	Midbrain motor related	ET strurcture
x	Nucleus x	MY-mot	Medulla motor related	ET strurcture
Xi	Xiphoid thalamic nucleus	MTN	Midline group of the dorsal thalamus	ET strurcture
XII	Hypoglossal nucleus	MY-mot	Medulla motor related	ET strurcture
y	Nucleus y	MY-mot	Medulla motor related	ET strurcture
IV	Trochlear nucleus	MBmot	Midbrain motor related	ET strurcture
LIN	Linear nucleus of the medulla	MY-mot	Medulla motor related	ET strurcture
AP	Area postrema	MY-sen	Medulla sensory related	ET strurcture
MDRN	Medullary reticular nucleus	MY-mot	Medulla motor related	ET strurcture
SPVC	Spinal nucleus of the trigeminal caudal part	MY-sen	Medulla sensory related	ET strurcture
