# Supplementary material for: Developmental molecular controls over arealization of descending cortical motor pathways
Source: Research Square preprint supplement (doi:10.21203/rs.3.rs-3166328/v1), 2023-07-24
Supplement: Supplementary file 5 [file b5673380a0e832a1556cc9e3.xlsx]

## Sheet: Top100SpaceGenes_Representative
Cluster (Pseudospace)	Gene
1	4930447C04Rik
1	6430573F11Rik
1	Adamts18
1	Adra1a
1	Astn2
1	Cntfr
1	Cntn1
1	Crim1
1	Csmd1
1	Csrnp3
1	Dpyd
1	Dync1i1
1	Enox1
1	Epha7
1	Ephb1
1	Fam171a1
1	Fras1
1	Frmd6
1	Gabrb2
1	Gabrb3
1	Gm12394
1	Gm28928
1	Gpc5
1	Gprin3
1	Gria3
1	Grik4
1	Il1rap
1	Kcnj3
1	Kcnq1
1	Klhl1
1	Lcorl
1	Mgat4c
1	Mkx
1	Nckap5
1	Ndst3
1	Nedd4l
1	Nr3c2
1	Nrcam
1	Opcml
1	Pantr1
1	Pcdh17
1	Pcsk2
1	Phf20l1
1	Pigk
1	Rn18s-rs5
1	Samd4
1	Sergef
1	Sez6l
1	Shc3
1	St6galnac5
1	Stk39
1	Stxbp5l
1	Tcte2
1	Tmeff1
1	Tnr
1	Vwc2
1	Wwc1
1	Xist
2	9330162G02Rik
2	A230103L15Rik
2	A330076H08Rik
2	Aff2
2	Agbl4
2	Ano4
2	Arid5b
2	Arl15
2	Arpp21
2	Atp2b1
2	Atp6v0a1
2	Atp8a1
2	Basp1
2	Cacna1a
2	Camk2a
2	Camkv
2	Cdc42bpa
2	Cdh10
2	Cdh12
2	Cdh13
2	Cntnap5b
2	Csmd2
2	Csmd3
2	Ctnna2
2	Dgkz
2	Dpp10
2	Efna5
2	Etl4
2	Etv5
2	Fam20a
2	Fat3
2	Gabra5
2	Gm4258
2	Gnas
2	Gpr158
2	Gria2
2	Grip1
2	Gucy1b3
2	Hdac9
2	Hdgfrp3
2	Igsf21
2	Ipcef1
2	Kalrn
2	Kcnq3
2	Klhl29
2	Lhfp
2	Lin7a
2	Lingo2
2	Lrfn5
2	Malat1
2	Mapk10
2	Meg3
2	Mical2
2	Mmp17
2	Ncam2
2	Neto1
2	Nfia
2	Nos1ap
2	Nrg3
2	Ntng1
2	Pcdh7
2	Pde4a
2	Pex5l
2	Ppfia2
2	Ppm1l
2	Ppp3ca
2	Prkca
2	Ptpro
2	Rasgrp1
2	Rian
2	Sdk2
2	Sgcz
2	Shank2
2	Slc24a3
2	Slc35f1
2	Slc35f4
2	Slc9a9
2	Snhg14
2	Sorl1
2	Spock1
2	St8sia5
2	Syne1
2	Tenm1
2	Thsd7a
2	Tmem135
2	Tmtc1
2	Zeb2
2	Zfp804a
3	9630028H03Rik
3	A330102I10Rik
3	A830018L16Rik
3	Apbb2
3	Arhgap5
3	Arid1b
3	Arpc2
3	Brinp3
3	Cdh20
3	Chrm3
3	Cntnap5a
3	Ctnna3
3	Dock3
3	Dscam
3	Esrrg
3	Evi5
3	Faah
3	Fam189a1
3	Fam19a2
3	Farp1
3	Frmd5
3	Fut9
3	Gabbr2
3	Ghr
3	Gipr
3	Gtdc1
3	Hs2st1
3	Kcnj6
3	Kctd8
3	Lpp
3	Lrrtm3
3	Lrrtm4
3	Maml2
3	Mtus2
3	Myo5a
3	Myrip
3	Necab1
3	Negr1
3	Nfib
3	Nr3c1
3	Nrp1
3	Pcdh9
3	Pdzd2
3	Pdzrn3
3	Pdzrn4
3	Phlpp1
3	Plcb1
3	Pnn
3	Ppp1r16b
3	Prkacb
3	Ralyl
3	Rbms1
3	Rgs6
3	Rora
3	Ryr2
3	Slc4a10
3	Sorcs1
3	Sox5
3	Sox5os4
3	Specc1
3	Stxbp6
3	Syt2
3	Tcerg1l
3	Tiam2
3	Tjp1
3	Tnpo1
3	Ttc28
3	Ttll7
3	Vsnl1
3	Wscd2
3	Wwox
3	Zfp804b
4	4930402H24Rik
4	4930587E11Rik
4	5730522E02Rik
4	Aak1
4	AC129186.1
4	AC165953.2
4	Adcy8
4	Agap1
4	Arap2
4	Asap2
4	Bcl11a
4	Bicdl1
4	Bicral
4	Chst11
4	Clk1
4	Cntn3
4	Cntn6
4	Cwc22
4	Ddx39b
4	Dennd1b
4	Disp1
4	Dlg1
4	Dock7
4	Edil3
4	Esyt2
4	Fam19a1
4	Fbxl2
4	Fgf12
4	Galnt18
4	Galntl6
4	Gas6
4	Gm26905
4	Gm42418
4	Gucy1b1
4	Hs3st5
4	Hs6st3
4	Htr1f
4	Ildr2
4	Kcnk9
4	Kcnt2
4	Kctd16
4	Kifap3
4	Klf12
4	Lmo7
4	Lrrk2
4	Ltbp1
4	Mia2
4	Nipsnap2
4	Npnt
4	Nsd2
4	Nsd3
4	Pde8b
4	Pla2g4e
4	Pnisr
4	Ppm1h
4	Ppp4r3a
4	Ppp4r3b
4	Ptpn5
4	Rgma
4	Rnf152
4	Rnpc3
4	Robo1
4	Rufy2
4	Rxfp1
4	Satb1
4	Sfpq
4	Sgk1
4	Sh2d5
4	Slf2
4	Son
4	Sorbs1
4	Tcf25
4	Tcf4
4	Thoc1
4	Tmem132b
4	Tmem44
4	Tpr
4	Trpm3
4	Tspoap1
4	Ttc3
4	Ttc8
4	Uggt2
4	Utrn
4	Virma
4	Vps13c
4	Vrk2
4	Vti1a
4	Zeb1
5	Acvr2a
5	Aff4
5	Ankib1
5	Arsb
5	Astn1
5	Atp2c1
5	Chd9
5	Clasp2
5	Cnih3
5	Cnnm1
5	D430041D05Rik
5	Dip2a
5	Dip2b
5	Dpysl3
5	Egfem1
5	Ep400
5	Fus
5	Galnt17
5	Gm20754
5	Gm3764
5	Gm48742
5	Gpc1
5	Grin3a
5	Hs3st4
5	Hsp90aa1
5	Hsp90ab1
5	Kcnab1
5	Kmt2e
5	Lgr4
5	Lhfpl3
5	Limch1
5	Lix1
5	Lrch1
5	Lrrc8c
5	Map3k5
5	Mapk4
5	March1
5	Matr3
5	Mb21d2
5	Mcf2l
5	Mlip
5	Msantd2
5	Mvb12b
5	Nbeal1
5	Ncald
5	Nln
5	Nudcd3
5	Pak1
5	Pak7
5	Pde10a
5	Pou6f2
5	Psd3
5	Pvt1
5	Retreg1
5	Ripor2
5	Runx1t1
5	Samd5
5	Scn1a
5	Setd5
5	Sez6
5	St7
5	Stac
5	Tcf12
5	Thoc2
5	Tia1
5	Tiam1
5	Tmem131l
5	Tmem132d
5	Tmtc2
5	Trank1
5	Tsc1
5	Tshz3
5	Ubr5
5	Unc13b
5	Unc5d
5	Usp43
5	Wdpcp
5	Xrn1
6	4930419G24Rik
6	Adcy9
6	Aff3
6	Ano3
6	Apba1
6	Asic2
6	Atp2b4
6	B3galt1
6	Braf
6	Btbd9
6	Cacna2d3
6	Cacnb2
6	Caln1
6	Cdh11
6	Cdk17
6	Celf4
6	Cep112
6	Cntn5
6	Cpe
6	Cpne8
6	Cttnbp2
6	Dcc
6	Dmd
6	Epha5
6	Epha6
6	Eps8
6	Fchsd2
6	Flrt2
6	Foxp1
6	Fstl5
6	Fut8
6	Gabra2
6	Galnt7
6	Gm26848
6	Gnaq
6	Gria1
6	Grm3
6	Kcnb2
6	Kcnd3
6	Khdrbs3
6	Ldb2
6	Lgi1
6	Magi1
6	Mast4
6	Mbp
6	Mctp1
6	Meis2
6	Mmp16
6	Mpped2
6	Msra
6	Nrip1
6	Nrxn3
6	Ntrk3
6	Pam
6	Parp8
6	Pbx1
6	Pcdh10
6	Pde1a
6	Ptprt
6	Rab3c
6	Rasgrf2
6	Ryr3
6	Sgcd
6	Sgms1
6	Slit3
6	Smyd3
6	Snap25
6	Sobp
6	Spon1
6	St6galnac3
6	Stxbp5
6	Syn3
6	Tox
6	Trpc5
6	Wasf1
6	Xylt1
6	Zdhhc14
