# Supplementary material for: Developmental molecular controls over arealization of descending cortical motor pathways
Source: Research Square preprint supplement (doi:10.21203/rs.3.rs-3166328/v1), 2023-07-24
Supplement: Supplementary file 6 [file ee9286c37728dfd4899ea7c0.xlsx]

## Sheet: Tracer
Name	tracer type	Titer	Injected volumn in nl	Source	Link
rAAV2-retro-CAG-tdTomato	retrograde	2.6 x 10E12 vg/ml	~200	Vector core facility, University of North Carolina	https://www.med.unc.edu/genetherapy/vectorcore/in-stock-aav-vectors/
rAAV2-retro-CAG-GFP	retrograde	3.5 x 10E12 vg/ml	~200	Vector core facility, University of North Carolina	https://www.med.unc.edu/genetherapy/vectorcore/in-stock-aav-vectors/
rAAV2-retro-CAG-Cre	retrograde	4.1 x 10E12 vg/ml	~200	Vector core facility, University of North Carolina	https://www.med.unc.edu/genetherapy/vectorcore/in-stock-aav-vectors/
rAAV1-CAG-tdTomato	anterograde	5.3 x 10E12 vg/ml	~140	Vector core facility, University of North Carolina	https://www.med.unc.edu/genetherapy/vectorcore/in-stock-aav-vectors/
ssAAV-1/2-CAG-dlox-tdTomato(rev)-dlox-WPRE-bGHp(A) (v167-1)	anterograde (Cre dependent)	7.9 x 10E12 vg/ml	~110	Viral Vector Facility, ETH Zurich	https://vvf.ethz.ch/
ssAAV-retro/2-shortCAG-H2BJ_EGFP-WPRE-SV40p(A) (v509-retro)	retrograde	4.3 x 10E12 vg/ml	~200	Viral Vector Facility, ETH Zurich	https://vvf.ethz.ch/
ssAAV-retro/2-shortCAG-H2BJ_mScarlet-I-WPRE-SV40p(A) (v547-retro)	retrograde	8.2 x 10E12 vg/ml	~200	Viral Vector Facility, ETH Zurich	https://vvf.ethz.ch/
Sindbis virus barcode library expressing GFP	retrograde	2 x 10E9 vg/ml	~80	MAPseq core facility, Cold Spring Harbor Laboratory	https://cshl.ilabsolutions.com/service_center/show_external/4539
Red Retrobeads™	retrograde	NA	200-250	Lumafluor	https://lumafluor.com/shop/ols/products/xn-red-retrobeads-100-l-o9a1330r

## Sheet: coordinates
Age	Target structure	AP in mm (B, Bregma; L, Lambda)	ML in mm	DV in mm (from brain surface)
P0	MO	0.7, 0.2 (B)	0.8, 0.7	0.5
P0	Somatosensory cortex (primary)	1.5, 2.0 (L)	1.5	0.5
P3	MO	0.7, 0.2 (B)	0.8, 0.7	0.5
P3	Somatosensory cortex (primary)	2.5, 2.1 (L)	1.3, 1.8	0.5
P7	MO	0.7, 0.2 (B)	0.8, 0.8	0.5
P7	Somatosensory cortex (primary)	1.3, 1.8 (L)	2.5, 2.1	0.5
P7	visual cortex	0 (L)	2.0, 2.2	0.5
P56	MO	1.0, 2.0, 2.5 (B)	1.0 , 1.0 , 1.0	0.7-0.5
P56	Somatosensory cortex (primary)	-0.5, 0, -1 (B)	3.0, 3.0, 3.0	1
P56	visual cortex	1.0 (L)	2.0	0.5
P56	visual cortex	-3.6, -3.4 (B)	2.4, 2.4	0.5
P14	Motor cortex	1.0, 0.5 (B)	1.0, 1.0	0.7-0.5
P14	Visual + retrosplenial cortex	-2.6, -2.9 (B)	1.2, 1.2	0.7-0.5

## Sheet: Animal number
Figure	Experiment	Group	animal number	single L5 neurons	Note
1 & Ext.Fig.1	AAV2-retro	SpC at P3 to P70	4
	AAV2-retro	SpC at P8 to P70	4
	AAV2-retro	SpC at P12 to P70	4
	AAV2-retro	SpC at P21 to P70	5
	AAV2-retro	SpC at P56 to P70	4
1	AAV2-retro	Pons at P3 to P70	3
Ext.Fig.1	Retrobeads	SpC at P3 to P70	3
	Retrobeads	SpC at P10 to P70	3
	Retrobeads	SpC at P14 to P70	3
	Retrobeads	SpC at P21 to P70	3
	Retrobeads	SpC at P56 to P70	3
1 & Ext.Fig.2	MAPseq	MO P0 injection	2	21532
	MAPseq	SSp P0 injection	2	7099
	MAPseq	MO P3 injection	3	69681
	MAPseq	SSp P3 injection	3	36802
	MAPseq	MO P7 injection	7	85259
	MAPseq	SSp P7 injection	3	31024
	MAPseq	VIS P7 injection	4	30440
	MAPseq	MO P10 injection	2	41206
	MAPseq	SSp P10 injection	2	1811
	MAPseq	VIS P10 injection	2	11211
	MAPseq	MO P56 injection	6	6745
	MAPseq	SSp P56 injection	4	2610
	MAPseq	VIS P56 injection	2	4227
2, 3 & Ext.Fig.2 & 3	Retro-NucSeq	SpC at P0 to P4 MO	6	3256	color indicated, pooling of nuclei; number of QC L5 ET nuclei
	Retro-NucSeq	SpC at P0 to P4 SSp	6	1283
	Retro-NucSeq	SpC at P0 to P4 SSs	6	638
	Retro-NucSeq	SpC at P3 to P8 MO	6	5113
	Retro-NucSeq	SpC at P3 to P8 SSp	6	1524
	Retro-NucSeq	SpC at P3 to P8 SSs	7	420
	Retro-NucSeq	SpC at P3 to P10 MO	5	3627
	Retro-NucSeq	SpC at P3 to P10 SSp	5	367
	Retro-NucSeq	SpC at P3 to P10 SSs	5	316
	Retro-NucSeq	SpC at P3 to P12 MO	4	1466
	Retro-NucSeq	SpC at P3 to P12 SSp	4	876
	Retro-NucSeq	SpC at P3 to P12 SSs	4	103
	Retro-NucSeq	SpC at P3 to P21 MO	8	2048
	Retro-NucSeq	SpC at P3 to P21 SSp	8	801
	Retro-NucSeq	SpC at P3 to P21 SSs	9	379
	Retro-NucSeq	Pons at P0 to P4 MO	8	2402
	Retro-NucSeq	Pons at P0 to P4 SSp	8	1925
	Retro-NucSeq	Pons at P0 to P4 SSs	11	1415
	Retro-NucSeq	Pons at P0 to P4 VISp	11	648
	Retro-NucSeq	Pons at P3 to P8 MO	4	2774
	Retro-NucSeq	Pons at P3 to P8 SSp	4	1449
	Retro-NucSeq	Pons at P3 to P8 SSs	11	1252
	Retro-NucSeq	Pons at P3 to P8 VISp	15	2575
	Retro-NucSeq	Pons at P3 to P12 MO	7	2126
	Retro-NucSeq	Pons at P3 to P12 SSp	7	1610
	Retro-NucSeq	Pons at P3 to P12 SSs	10	837
	Retro-NucSeq	Pons at P3 to P12 VISp	10	903
	Retro-NucSeq	Pons at P3 to P21 MO	6	2906
	Retro-NucSeq	Pons at P3 to P21 SSp	6	1436
	Retro-NucSeq	Pons at P3 to P21 SSs	10	1456
	Retro-NucSeq	Pons at P3 to P21 VISp	14	1099
Ext.Fig.1	cC3 IHC	P7	3
	cC3 IHC	P10	2
	cC3 IHC	P14	2
4 & Ext.Fig.4	CRISPR-MO_control	SpC at P1, MO at P14, Ω P21	7
Ext.Fig.4	CRISPR-MO_Meis2	SpC at P1, MO at P14, Ω P21	4
Ext.Fig.4	CRISPR-MO_Nfia	SpC at P1, MO at P14, Ω P21	4
Ext.Fig.4	CRISPR-MO_Zbtb16	SpC at P1, MO at P14, Ω P21	4
4 & Ext.Fig.4	CRISPR-MO_Tfmix	SpC at P1, MO at P14, Ω P21	3
Ext.Fig.4	CRISPR-MO_Momix	SpC at P1, MO at P14, Ω P21	3
Ext.Fig.4	CRISPR-MO_Bcl6	SpC at P1, MO at P14, Ω P21	2
4 & Ext.Fig.4	CRISPR-Pons_VIS_control	Pons at P1, VIS/RSP at P14, Ω P21	4
Ext.Fig.4	CRISPR-Pons_MO_control	Pons at P1, MO at P14, Ω P21	2

## Sheet: MAPseq targets
Target	full_name	Note
cCTX	contralateral cortex	identifaction of intratelencphalic projection neurons (IT)
cSTR	contralateral striatum	identifaction of intratelencphalic projection neurons (L5 IT vs L5 ET)
TH	Thalamus	L5 ET target (Neurons with only thalamus as subcortical target were assigned as corticothalamic (CT) neurons and excluded from the pool of L5 ET neurons)
SC	Superior colliculus (Tectum)	L5 ET target ~corticotectal
RN	ventral midbrain (red nucleus)	Collection of ventral midbrain including the red nucleus; L5 ET target
P	Pons	L5 ET target ~corticopontine
MY	Medulla oblongata	L5 ET target ~corticobulbar
SpC-C	cervical spinal cord	L5 ET target ~ corticospinal, sum of SpC-C + SpC-L was combined to SpC
SpC-T	thoracic spinal cord	collected in only a subset of experiments; L5 ET target ~corticospinal
SpC-L	lumbar spinal cord	L5 ET target ~ corticospinal
Eye	Eye	CNS negative control
OB	Olfactory bulb	brain negative control (ambient barcode can be excluded)

## Sheet: CRISPR tools
AAV_ID	target_gene	Capsid	gRNA1_sequence	gRNA2_sequence	particles/uL	particles/mL	Group for axon qunatification
pAS156.4	Meis2	AAV2.retro	GCTCTGCAGACTTACGTGGT		6024000000	6024000000000	3KO|Meis2
pAS156.5	Nfia	AAV2.retro	TGAACAAGATCACCATGACG		5340000000	5340000000000	3KO|Nfia
pAS156.10	Zbtb16	AAV2.retro	TATCTCGAAGCATTCCAGCG		4480000000	4480000000000	3KO|Zbtb16
pAS158.6	Nfia	AAV2.retro	AGCCCTGGATTAGAGCACTG	TCCATACTTTATCTGCCTGG	4890000000	4890000000000	Nfia
pAS155.13	Control "Safe-habor"	AAV2.retro	GAGGGAAAGAAACCATCCCT		3940000000	3940000000000	control
