# Supplementary material for: Developmental molecular controls over arealization of descending cortical motor pathways
Source: Research Square preprint supplement (doi:10.21203/rs.3.rs-3166328/v1), 2023-07-24
Supplement: Supplementary file 7 [file efc7ddf1e2018565e5449d22.xlsx]

## Sheet: Top100perTimewave_Representativ
Cluster (Pseudotime)	Gene
1	Kcnn3
1	Negr1
1	Necab1
1	Gabrb1
1	Epha5
1	Cyth3
1	Snx10
1	Erc1
1	Sergef
1	Gabra5
1	Snrpn
1	Csgalnact1
1	Cntnap4
1	Adamts18
1	Bbs9
1	Elmod1
1	Csnk1g1
1	Mlip
1	Stac
1	Hs3st5
1	Sobp
1	Slc35f1
1	5730522E02Rik
1	Kcnip1
1	Arhgap44
1	Tanc2
1	Pitpnc1
1	Syt16
1	Slc8a3
1	Carmil1
1	C130071C03Rik
1	Rasgrf2
1	Arhgef28
1	Ipo11
1	Gpc5
1	Pvt1
1	Shank3
1	Ano6
1	Lsamp
1	Alcam
1	Fer
1	L3mbtl4
1	Crim1
1	AW554918
1	Rit2
1	Sema6a
1	Apba1
1	Clcn5
1	Slc16a2
1	Pak3
1	Glra2
1	Epha5
1	Grk3
1	Ntrk3
1	Hs3st2
1	Rbms3
1	Cep112
1	Prkd1
1	Slc8a3
1	Mctp1
1	C130071C03Rik
1	Pvt1
1	Gm26569
1	Lsamp
1	Slc16a2
1	Rxfp1
1	Cdkl2
1	Grk3
1	Met
1	Unc5d
1	Cdkl1
1	Nrep
1	Thsd7b
1	Gm16083
1	Cadm3
1	Kif26b
1	Grb14
1	Soga1
1	Nespas
1	Nbea
1	Col24a1
1	Runx1t1
1	Necab1
1	Epha7
1	Frmd3
1	Adamtsl1
1	9330182L06Rik
1	Lhfpl3
1	Jakmip1
1	Ttc28
1	Agk
1	Sbf2
1	Bbs9
1	Adam19
1	Slc8a3
1	Dlg5
1	Mtss1
1	Rfx3
1	Grk5
1	Glra2
2	Unc80
2	Grin1
2	Scn1a
2	Osbpl6
2	Dgkz
2	Rasgrp1
2	Ppip5k1
2	Dzank1
2	Sulf2
2	Ppm1l
2	Npnt
2	Lmo4
2	Nphp4
2	5031425E22Rik
2	Sorcs2
2	Sel1l3
2	Tmem132b
2	Mmp17
2	Ppp1r9a
2	Lncpint
2	Aak1
2	Iqsec1
2	Clstn3
2	Cacng8
2	Tacc1
2	Tmem38a
2	Slc35f3
2	Ppib
2	Gnb5
2	Syne1
2	P4ha1
2	Ogdh
2	Vmp1
2	Fbxl20
2	Sipa1l1
2	Chrm3
2	Mbnl2
2	Dip2b
2	Grin2a
2	Il1rap
2	Gm1976
2	Zeb1
2	Garem1
2	Atp9b
2	Pcsk5
2	Klf9
2	Hectd2
2	Cnnm2
2	Gpm6b
2	Rgl1
2	Dennd1a
2	Osbpl6
2	Zfp385b
2	Adar
2	9530036O11Rik
2	Tmem132d
2	Atp2b2
2	Pgbd5
2	Trank1
2	Sipa1l1
2	Atp8a2
2	Il1rap
2	Pacsin1
2	Pcsk5
2	Dmd
2	Unc80
2	Hdac4
2	Rgl1
2	Nebl
2	Rapgef4
2	Osbpl6
2	Zfp385b
2	Syt13
2	Fmn1
2	Ttc14
2	Sgip1
2	Adam22
2	Zfyve28
2	Ppargc1a
2	Gabra4
2	Tmem132d
2	Atp2b2
2	Psd3
2	Pcnx2
2	Rasgrf1
2	Rab6b
2	Anks1b
2	Lin7a
2	Sipa1l1
2	Thrb
2	Vps13b
2	Dgkg
2	Pkd1
2	Epb41l3
2	Garem1
2	Pcsk5
2	Magi2
2	Sorcs2
2	Peak1
2	Atxn1
3	Nck2
3	Ppip5k2
3	4930590L20Rik
3	Rabgap1
3	C1qtnf4
3	Adgrl2
3	Col15a1
3	Stmn1
3	Ttc28
3	Podxl2
3	Luzp2
3	Hook2
3	Maml2
3	Ncam1
3	Akap12
3	Plppr3
3	Nxn
3	Mef2c
3	Ly6h
3	St6gal2
3	Chka
3	Pdzd4
3	Las1l
3	4930590L20Rik
3	Pbx1
3	Cadm3
3	Fam129b
3	Zeb2
3	Acvr1
3	Sh3d19
3	Ddah1
3	Necab1
3	Ttc28
3	Fam20c
3	Mturn
3	Foxp1
3	Rimklb
3	Fchsd2
3	Unc5d
3	Gm26905
3	Gmip
3	Slc10a7
3	Itfg1
3	Gfod2
3	Map4
3	Slc35f1
3	Srgap1
3	Bcl11a
3	Ulk2
3	Heatr5a
3	Evl
3	Pfkp
3	Mef2c
3	Nln
3	Sh3bp5
3	Sybu
3	Cers5
3	Mb21d2
3	Nectin3
3	Robo2
3	Tulp4
3	Nrxn1
3	Cdh2
3	Tcf4
3	Pacs1
3	Grk5
3	Cask
3	Atp11c
3	Klf8
3	Sh3kbp1
3	Slco5a1
3	Gpsm1
3	C1qtnf4
3	Bhlhe22
3	Sh3d19
3	Adgrl2
3	Gm30382
3	Grm3
3	Nsg1
3	Ttc28
3	Auts2
3	Rimklb
3	Gm26905
3	Ncam1
3	Srgap1
3	Cacng4
3	Rac3
3	Pfkp
3	Dapk1
3	Mef2c
3	Basp1
3	Ndrg1
3	Tmem44
3	Nectin3
3	Tbc1d12
3	Cask
3	Atp11c
3	Bach2
3	Gm48742
3	Gm20275
4	Dst
4	Slc4a3
4	Prrc2c
4	Plxna2
4	Sptan1
4	Prrc2b
4	Ralgps1
4	Cwc22
4	Nop56
4	Atp11b
4	Gabbr2
4	Psip1
4	Ephb2
4	Ski
4	2900026A02Rik
4	Wscd2
4	Ybx3
4	Prkcg
4	Peg3
4	Slc8a2
4	Pou2f2
4	Sptbn4
4	Gpi1
4	Chd2
4	Mcf2l
4	Gas6
4	Zfp827
4	Adgrl1
4	Cmip
4	Dixdc1
4	Dmxl2
4	Ulk4
4	Ncoa7
4	Gng7
4	Camk2b
4	Kif3a
4	Gas7
4	Rap1gap2
4	Bptf
4	Ube2o
4	Ccdc88c
4	D130043K22Rik
4	Tnfrsf19
4	Cdh6
4	5031439G07Rik
4	Abcc1
4	Abcc5
4	Eif4g1
4	Syngap1
4	Bin1
4	Rnf165
4	Smc5
4	Slc4a3
4	Wscd2
4	Rasgef1a
4	Gpi1
4	Dixdc1
4	Ncoa7
4	Gng7
4	Camk2b
4	Rbfox1
4	Bin1
4	Ripor2
4	Eipr1
4	AC129186.1
4	Sphkap
4	Gpr158
4	Phf24
4	Nrd1
4	Gpi1
4	Herc2
4	Gas6
4	Nup93
4	Grik4
4	Osbpl10
4	Ncoa7
4	Gng7
4	Esyt2
4	Arsb
4	Bdp1
4	Pabpn1
4	Tnfrsf19
4	Cpne8
4	Syngap1
4	Sorbs1
4	Kdm6a
4	Rtl4
4	Gucy1b1
4	Gucy1a1
4	Virma
4	Hectd4
4	Gm49353
4	Mindy2
4	AC129186.1
4	Gm47283
4	Rarb
4	Ltbp1
4	Mcc
4	Dcc
4	Xist
5	Mkx
5	Gm28905
5	Mkx
5	Ube2w
5	Zdbf2
5	Speg
5	Smg7
5	Cep350
5	Rabgap1l
5	Mia3
5	Lpgat1
5	Golga1
5	Ubr3
5	Ralgapb
5	4932438A13Rik
5	Ash1l
5	Usp33
5	Rnf20
5	AI314180
5	Smap2
5	Psmb2
5	Phc2
5	Srrm1
5	Plekhm2
5	Gnai1
5	Kmt2e
5	Tmem214
5	Rab28
5	Cpeb2
5	Gak
5	Tra2a
5	Ptcd3
5	Setd5
5	Atp6v1e1
5	Lrp6
5	Plekha5
5	Sympk
5	Atp1a3
5	Supt5
5	Herc2
5	Whamm
5	Tmem135
5	Tnrc6a
5	Fus
5	Timm44
5	Atp6v1b2
5	Sugp1
5	Smarca5
5	Dnm2
5	Qrich1
5	Zfp445
5	Ccdc6
5	Zfc3h1
5	Agap2
5	Dtx3
5	Lrp1
5	Ewsr1
5	Mdh1
5	Mprip
5	Fxr2
5	2610507B11Rik
5	Rundc3a
5	Pnpla8
5	Map4k5
5	Psma3
5	Rbm25
5	Ylpm1
5	Ttll5
5	Arid4b
5	Cdk13
5	Jarid2
5	Cltb
5	Thoc7
5	Ddhd1
5	Chd8
5	Ubr5
5	Phf20l1
5	Ep300
5	Ppp6r2
5	Prpf40b
5	Tango2
5	Atp6v1a
5	Akap8
5	Safb
5	Pja2
5	Clip4
5	Heatr5b
5	Rnf14
5	Ndfip1
5	Ppp6r3
5	Rps6kb2
5	Esrra
5	Naa40
5	Rtn3
5	Tnks2
5	Pdcd4
5	Usp9x
5	Tspoap1
5	Bicral
5	Slf2
6	Npas2
6	Fam126b
6	Spred1
6	Idh3b
6	Acss2
6	Sclt1
6	Epb41l4b
6	Ptpn3
6	Iqsec3
6	Kcna1
6	Bicd1
6	Nell1
6	Cckbr
6	Slc16a10
6	Chpt1
6	Fnip1
6	Nlk
6	Etv1
6	Immp2l
6	Cdc14b
6	March11
6	Rcan2
6	Hecw2
6	Esrrg
6	Pde1a
6	Cplx1
6	Mast3
6	Tbc1d30
6	Jdp2
6	Rapgef5
6	Cpeb3
6	Fam126b
6	Dgkd
6	Mfsd4a
6	Snph
6	Camta1
6	Gm10419
6	Kcna1
6	Bckdhb
6	Rapgef5
6	Adcy9
6	Pip5k1b
6	Tnr
6	Cacnb4
6	Itgav
6	Abhd12
6	Snph
6	Sulf2
6	Prex1
6	Tmem189
6	Maml3
6	Kcna2
6	Tspan5
6	Epb41l4b
6	Ttc39b
6	Slc9a1
6	Nphp4
6	Ephx4
6	Gm10419
6	Galnt9
6	N4bp2l1
6	Kdm3a
6	St3gal5
6	Iqsec3
6	Rab30
6	Adgra1
6	Cx3cl1
6	Car7
6	Slc35f3
6	Pde4a
6	Igsf9b
6	Coro2b
6	Gnb5
6	Tfdp2
6	Bsn
6	Syne1
6	Atp2b1
6	Nlk
6	Dusp3
6	Fam20a
6	Immp2l
6	Jdp2
6	Rapgef5
6	Gfod1
6	Gmpr
6	Arhgef3
6	Samd4
6	March11
6	Trps1
6	Efr3a
6	Fam135b
6	Adcy9
6	Dexi
6	Clec16a
6	Kctd1
6	Synpo
6	St8sia5
6	Gria3
6	Catspere2
6	Jcad
